# Supplementary material for: Nitro-enabled catalytic enantioselective formal umpolung alkenylation of β-ketoesters
Source: PubMed Central journal article supplement — Chem Sci. 2017 Aug 2;8(9):6686–90. doi: 10.1039/c7sc02232h (PMC5625255; doi:10.1039/c7sc02232h), 2017-08-02
Supplement: SC-008-C7SC02232H-s002.pdf [file SC-008-C7SC02232H-s002.pdf]

## **Nitro-enabled catalytic enantioselective formal umpolung alkenylation of $\beta$ -ketoesters**

Abhijnan Ray Choudhury<sup>‡</sup>, Madhu Sudan Manna<sup>‡</sup> and Santanu Mukherjee\*

*Department of Organic Chemistry, Indian Institute of Science, Bangalore 560 012, INDIA*

sm@orgchem.iisc.ernet.in

### **SUPPORTING INFORMATION: PART B**

---

<sup>‡</sup> These authors contributed equally to this work

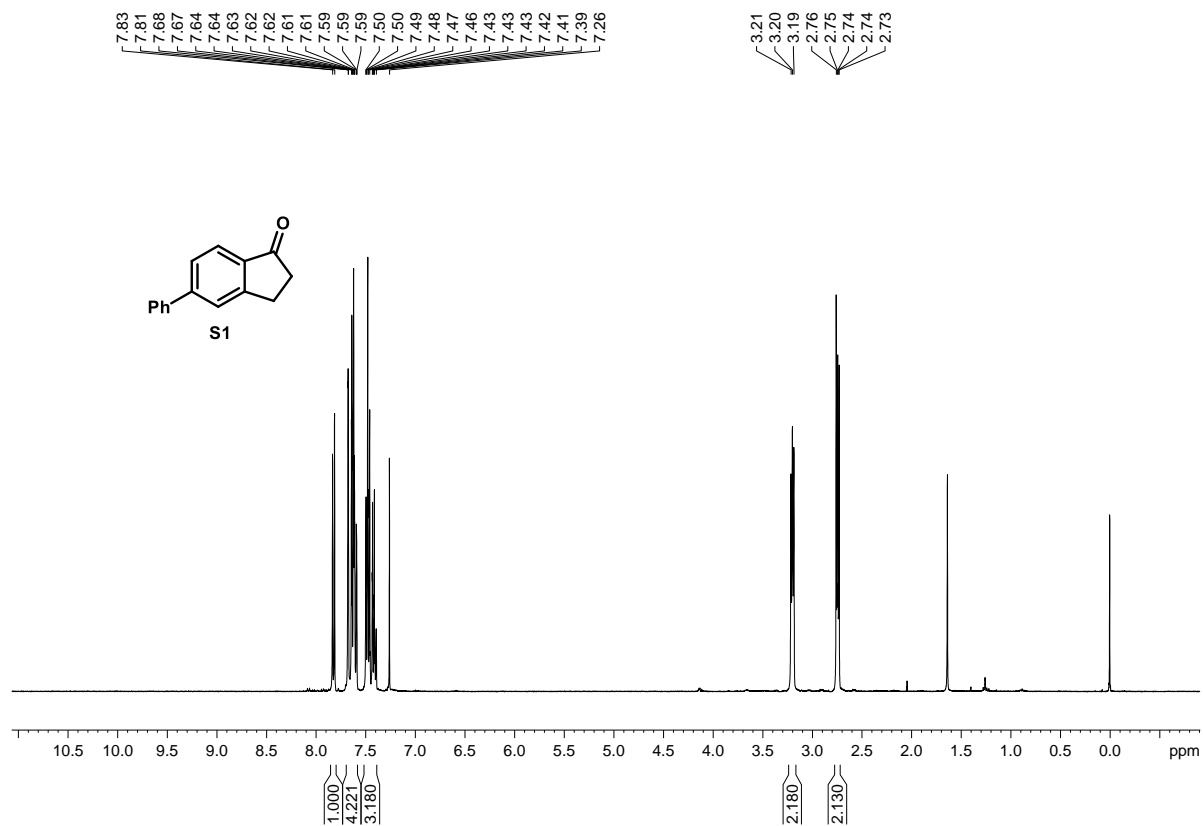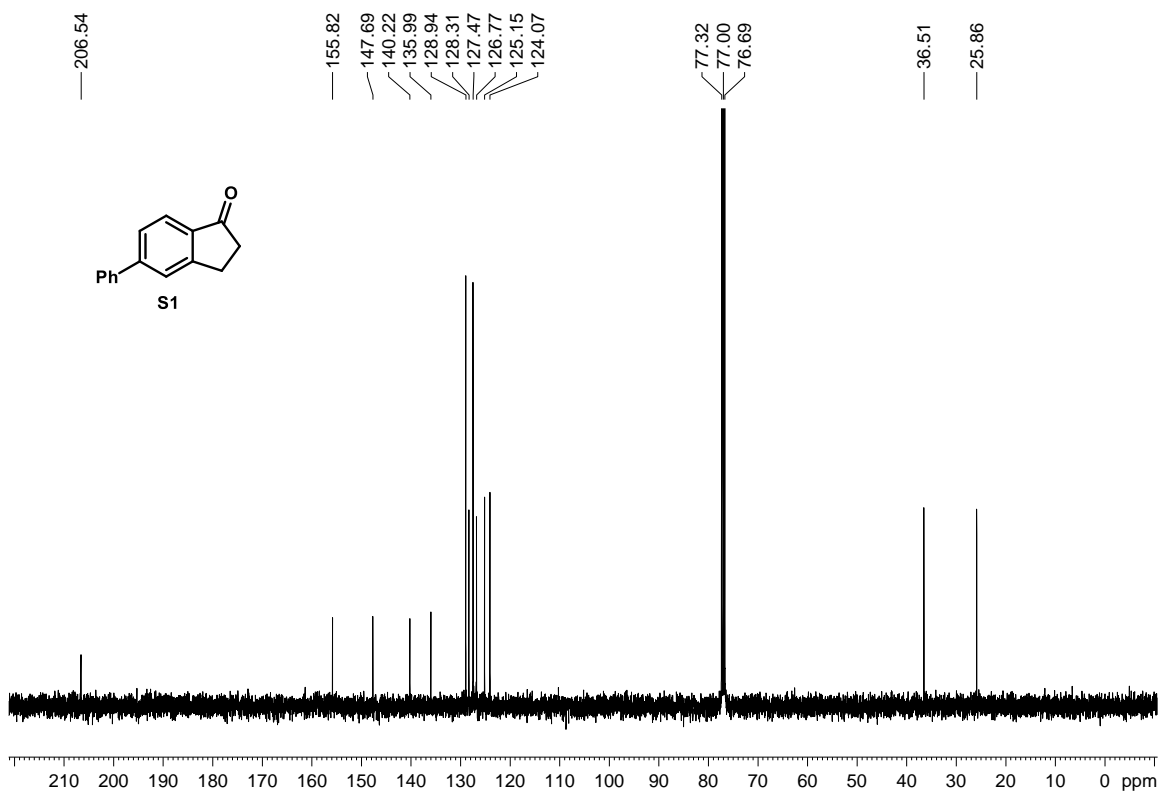

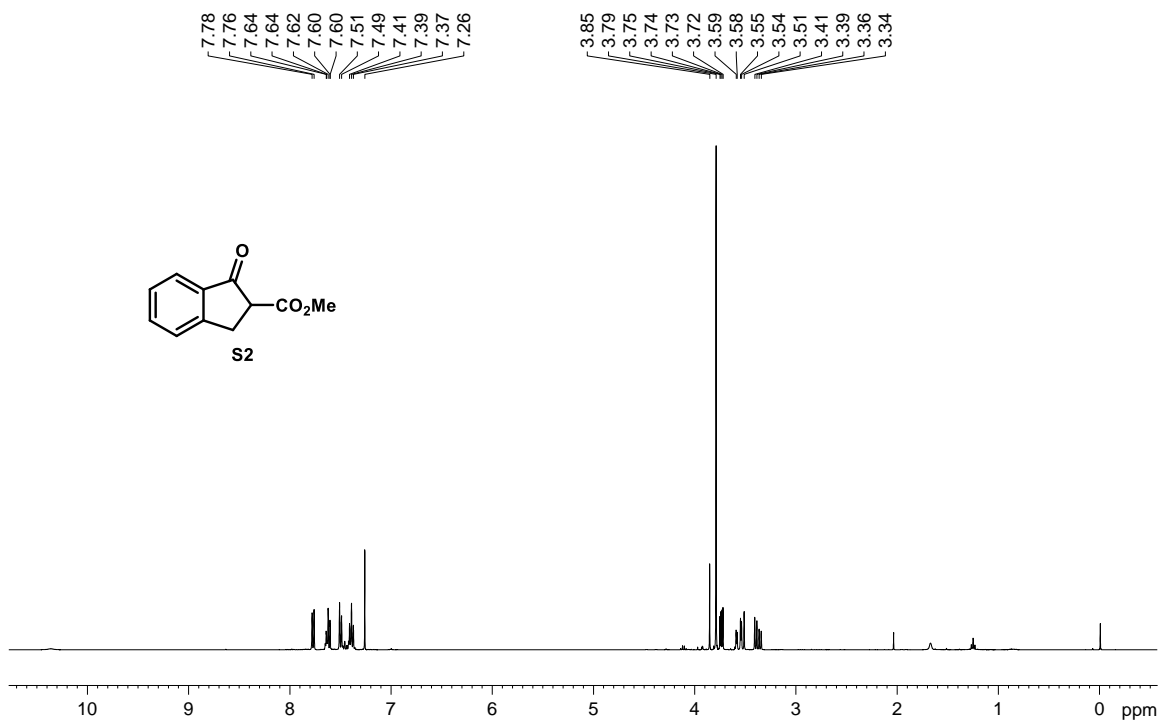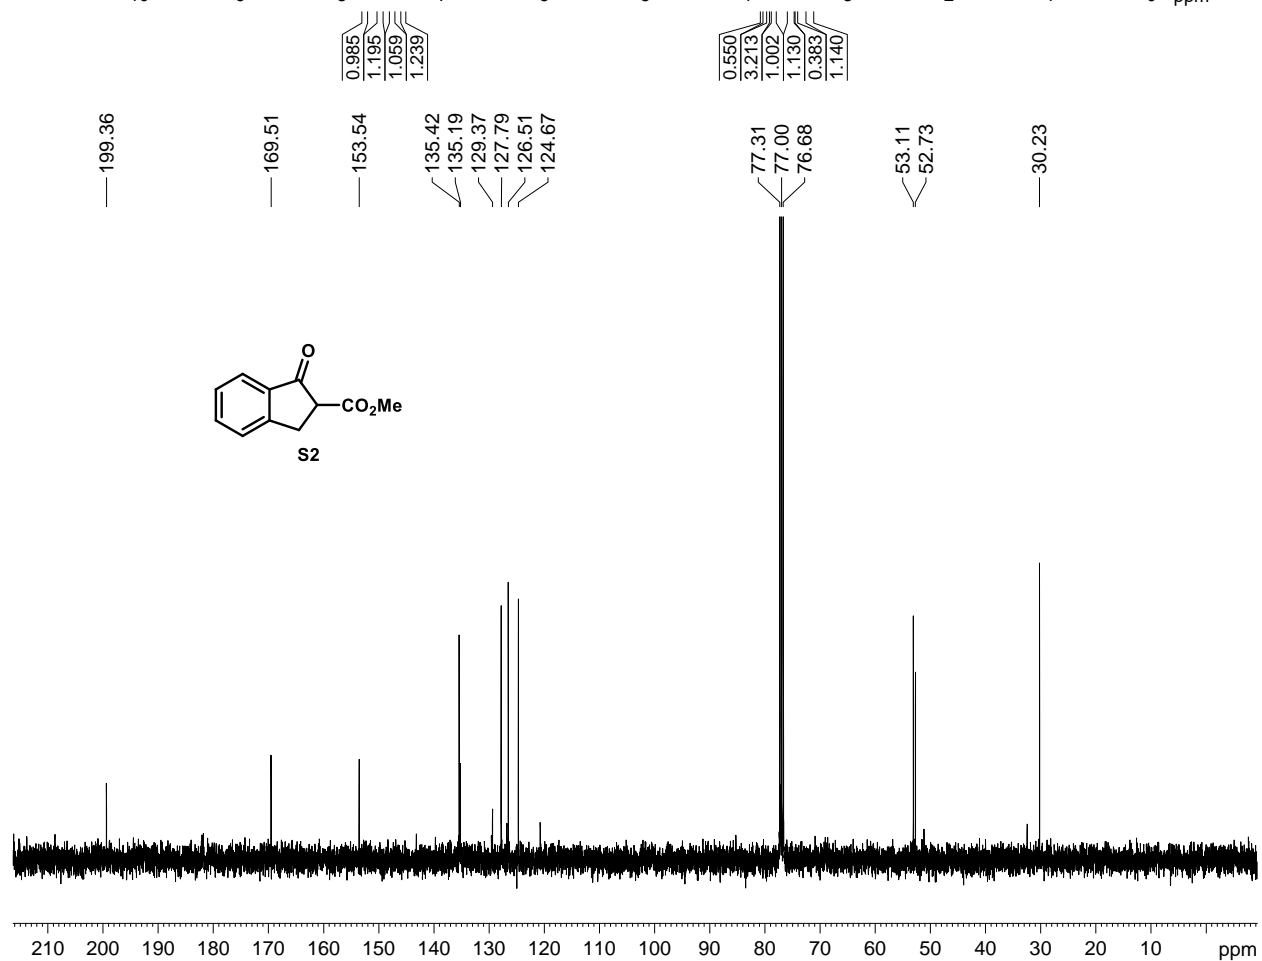

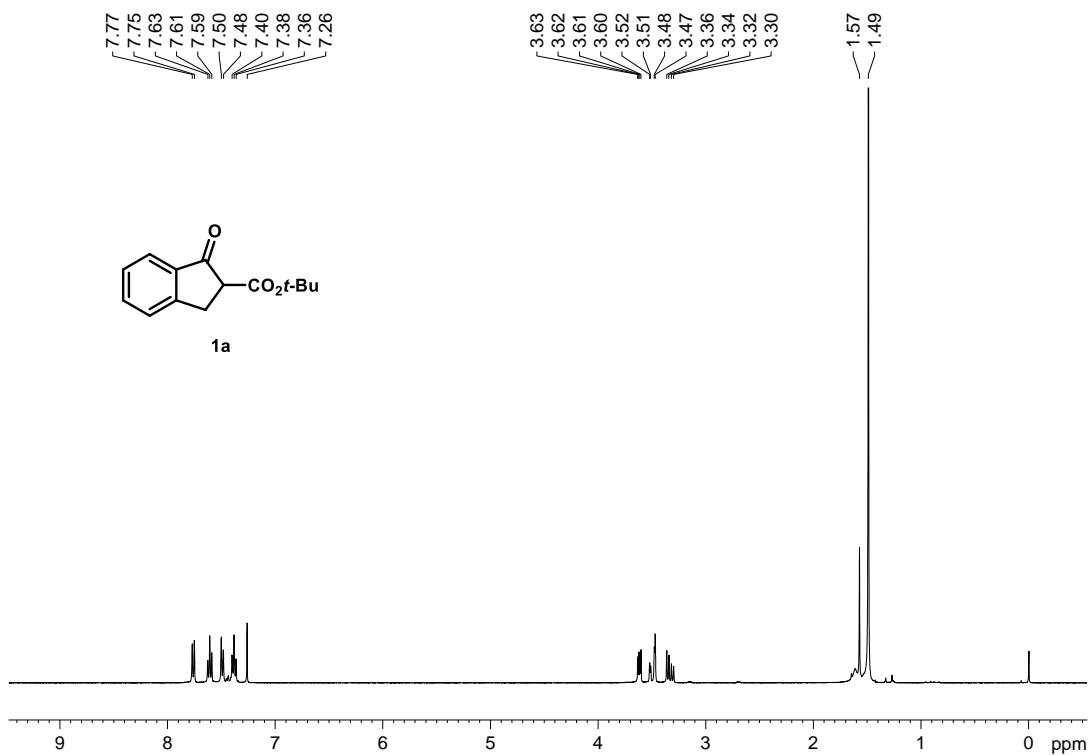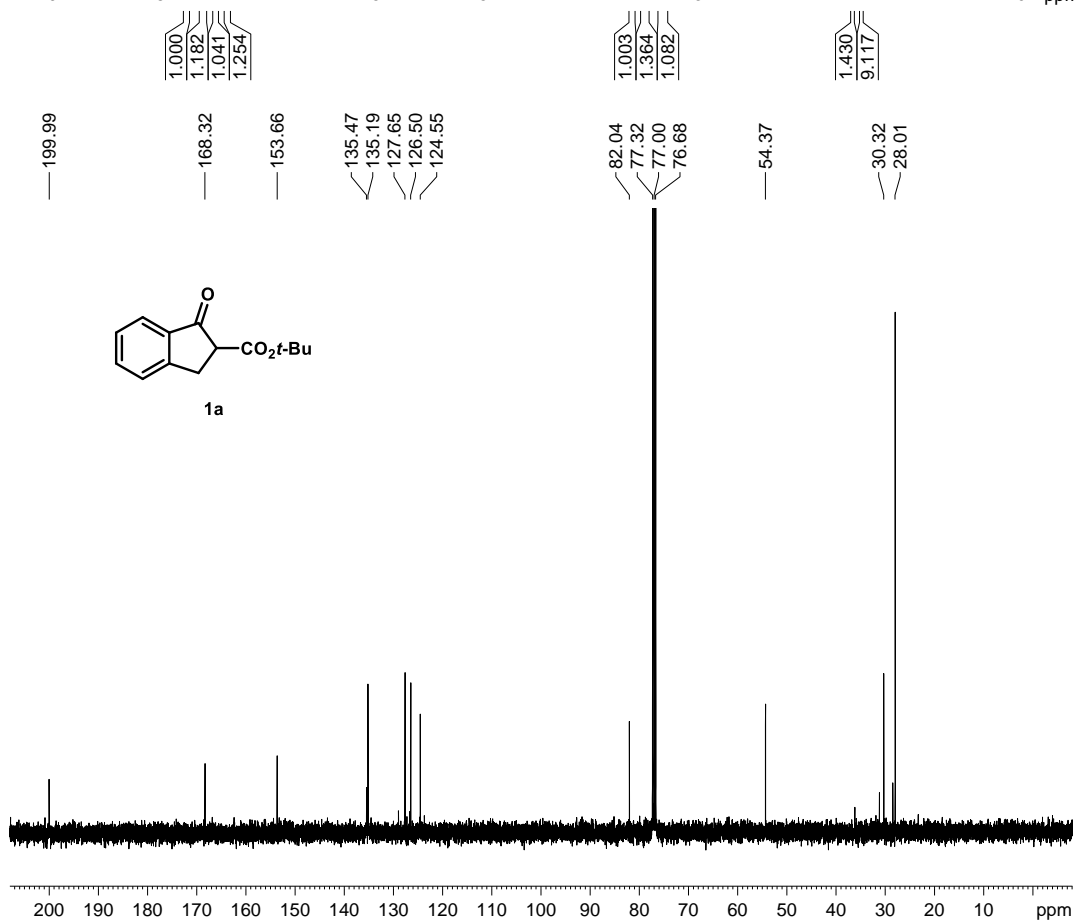



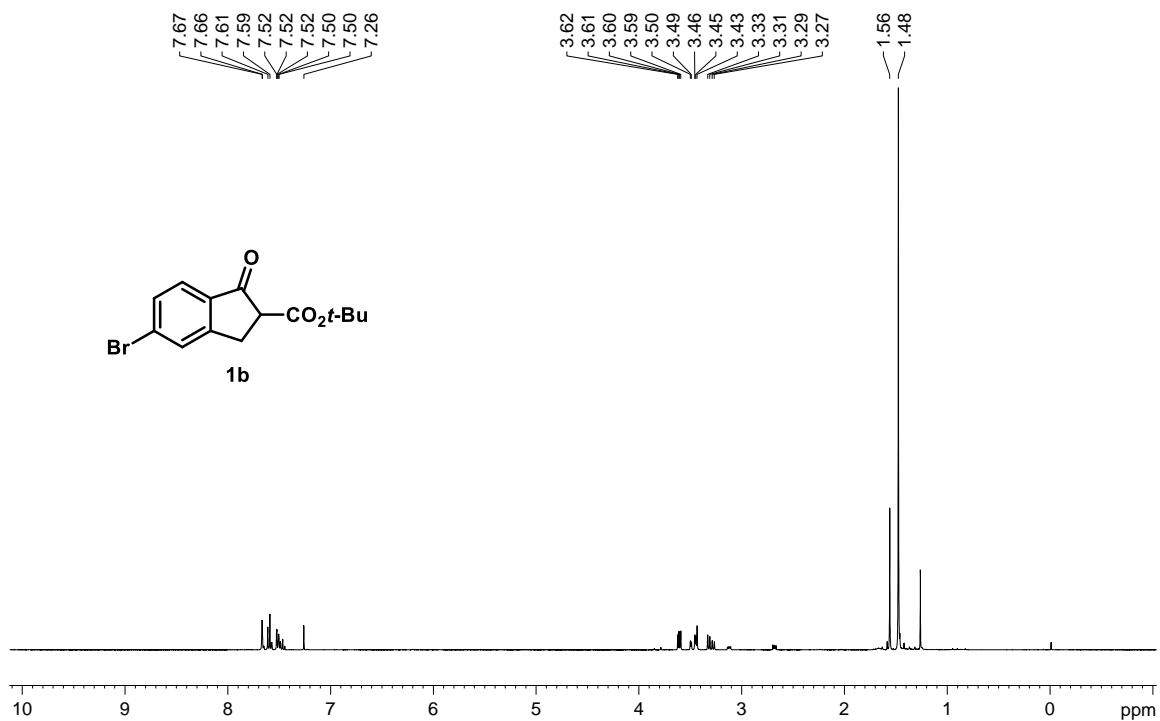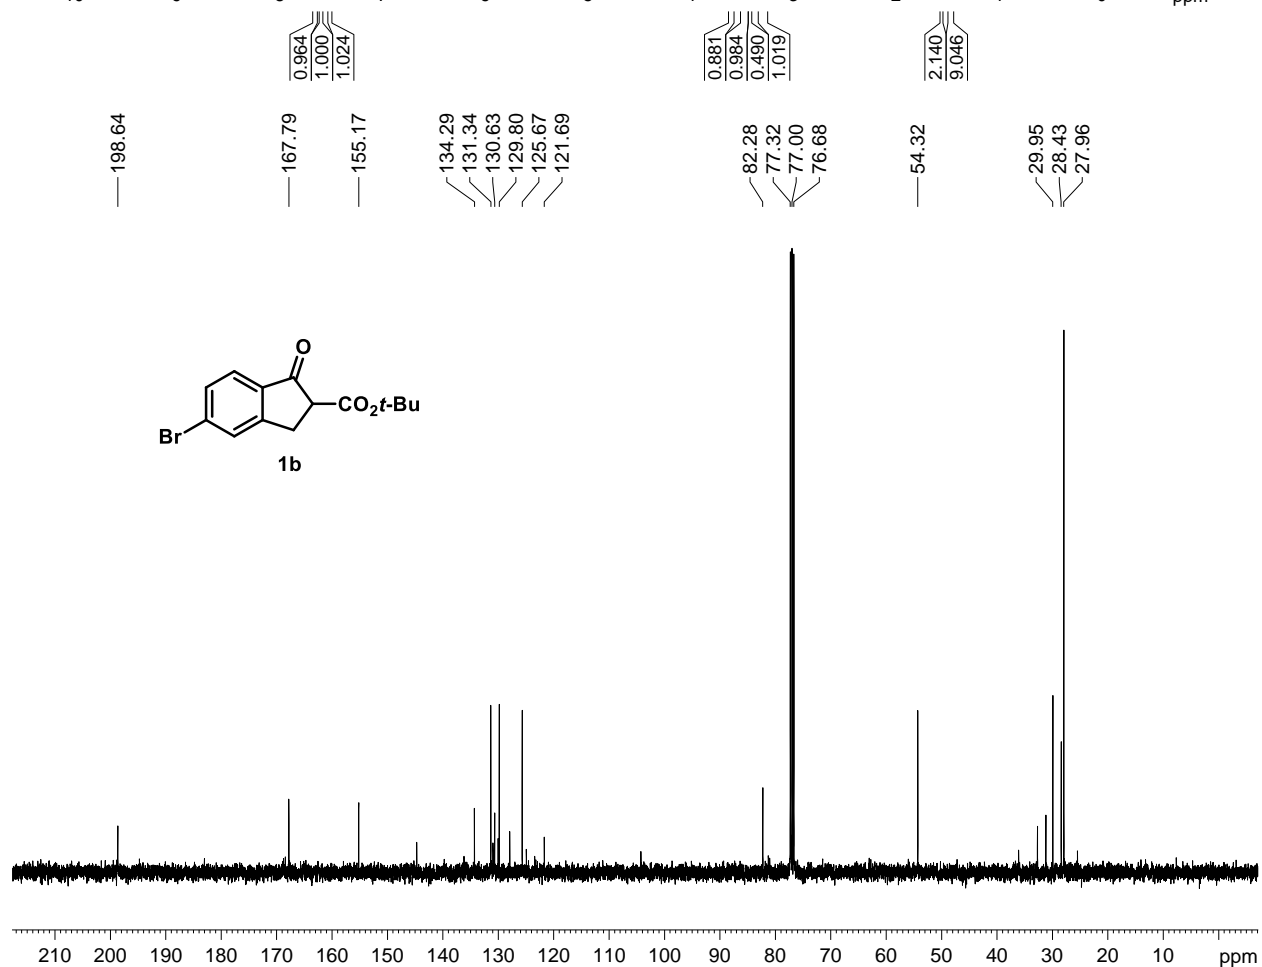

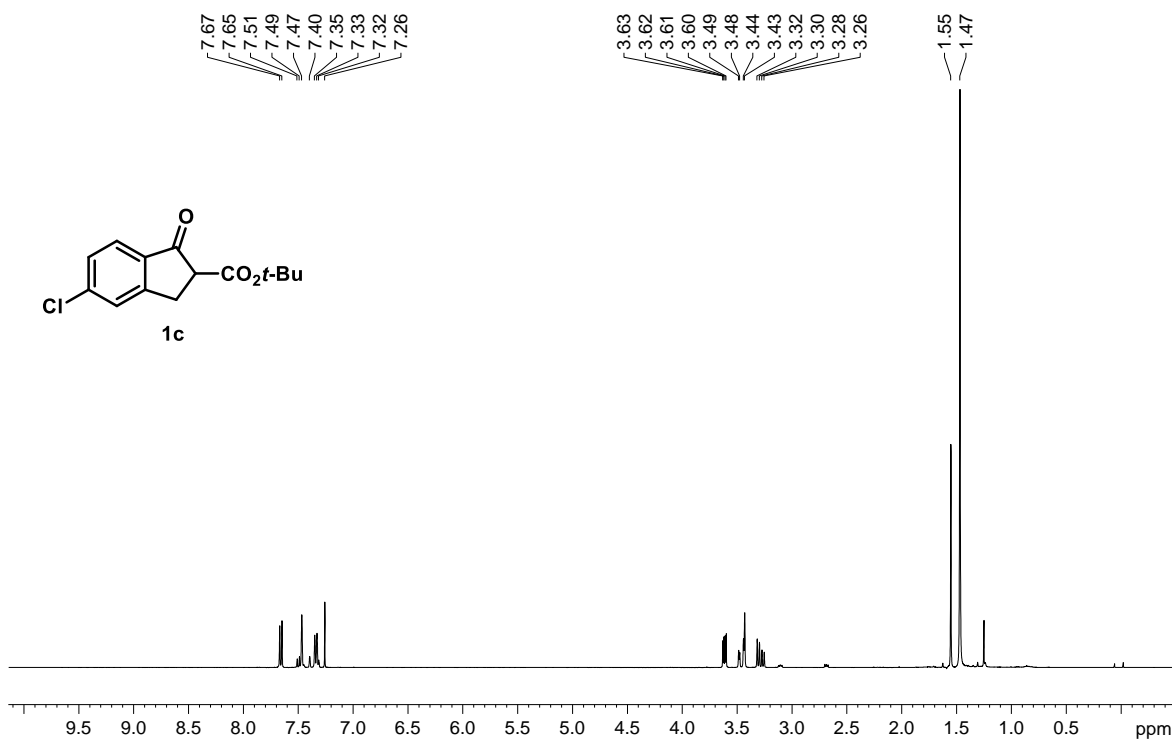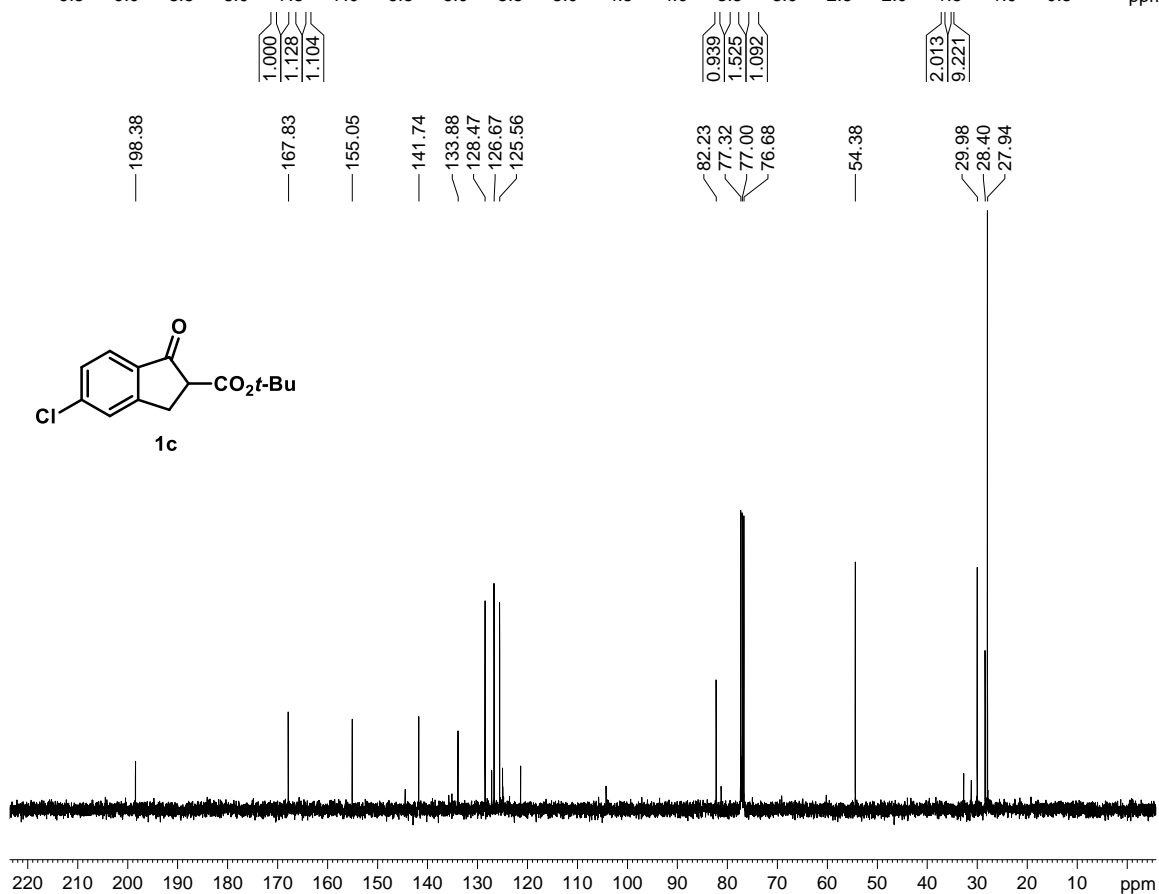

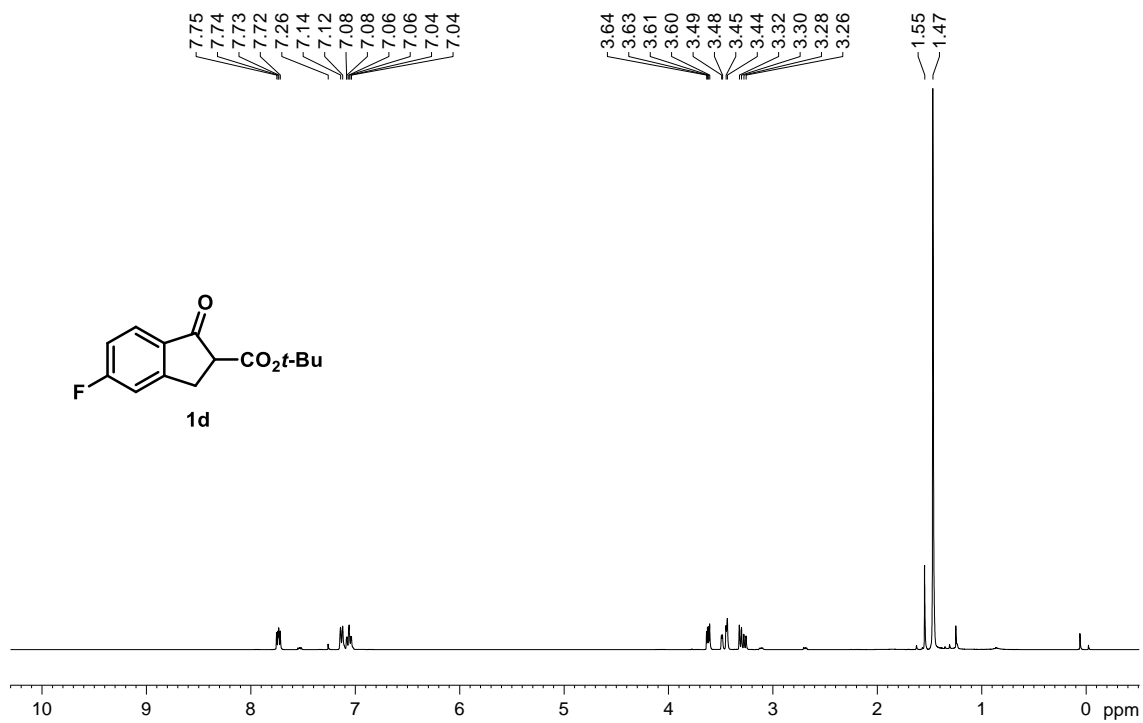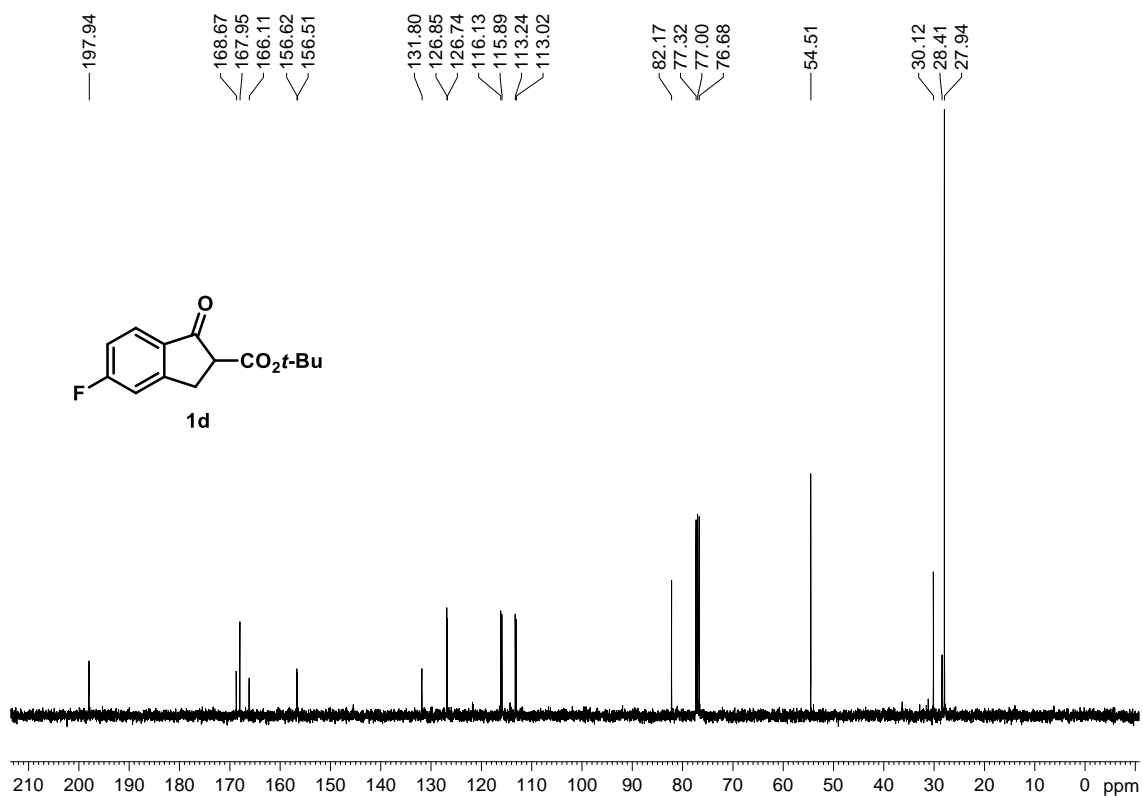

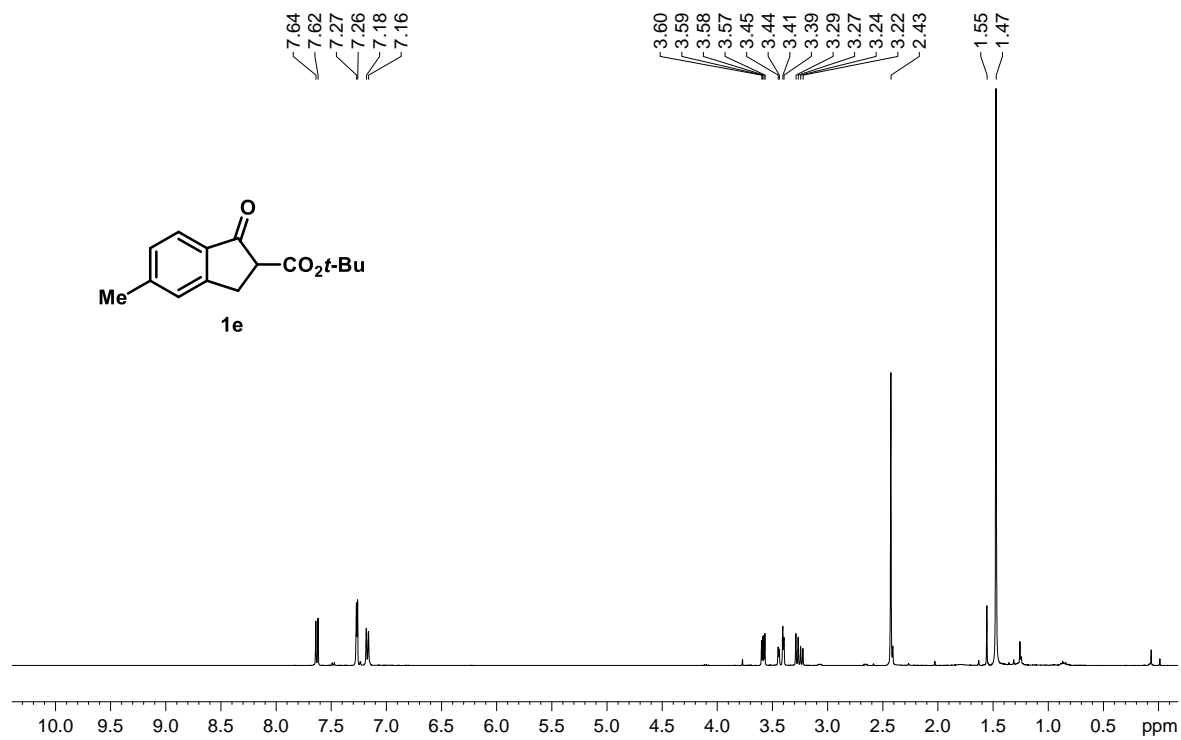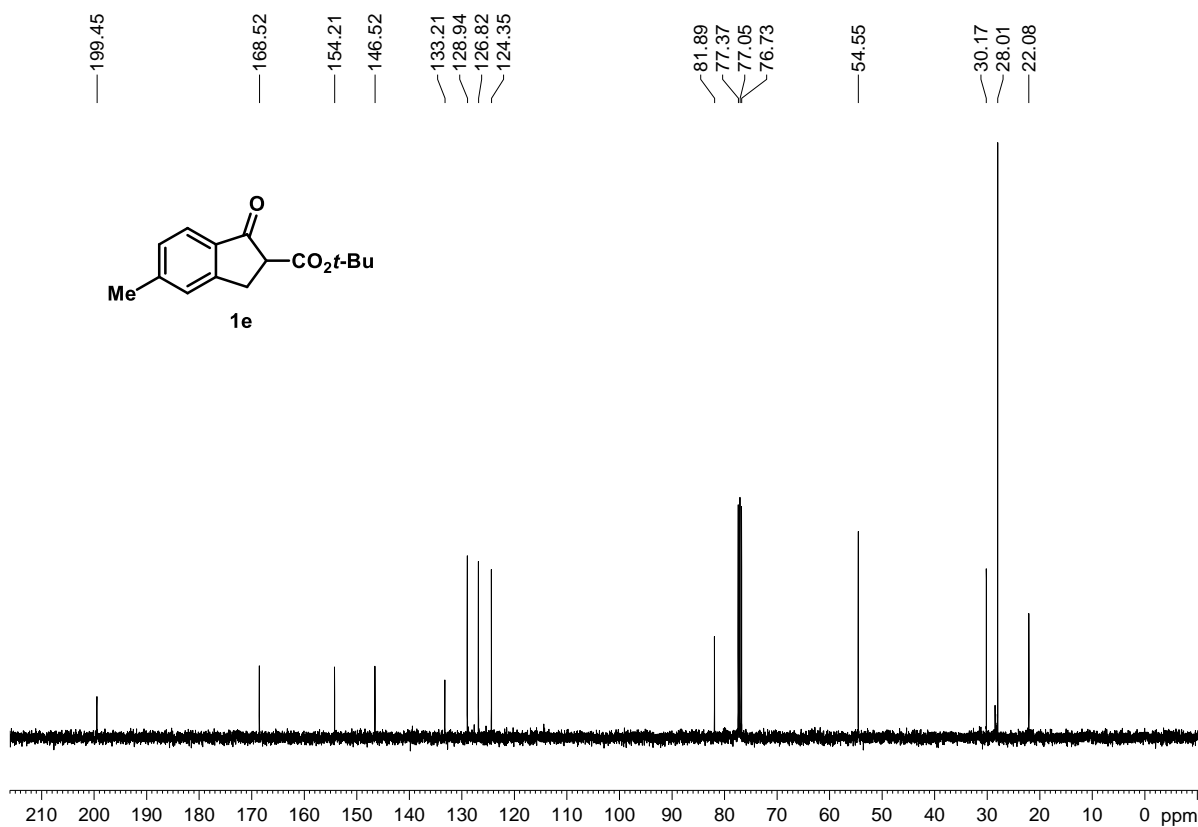

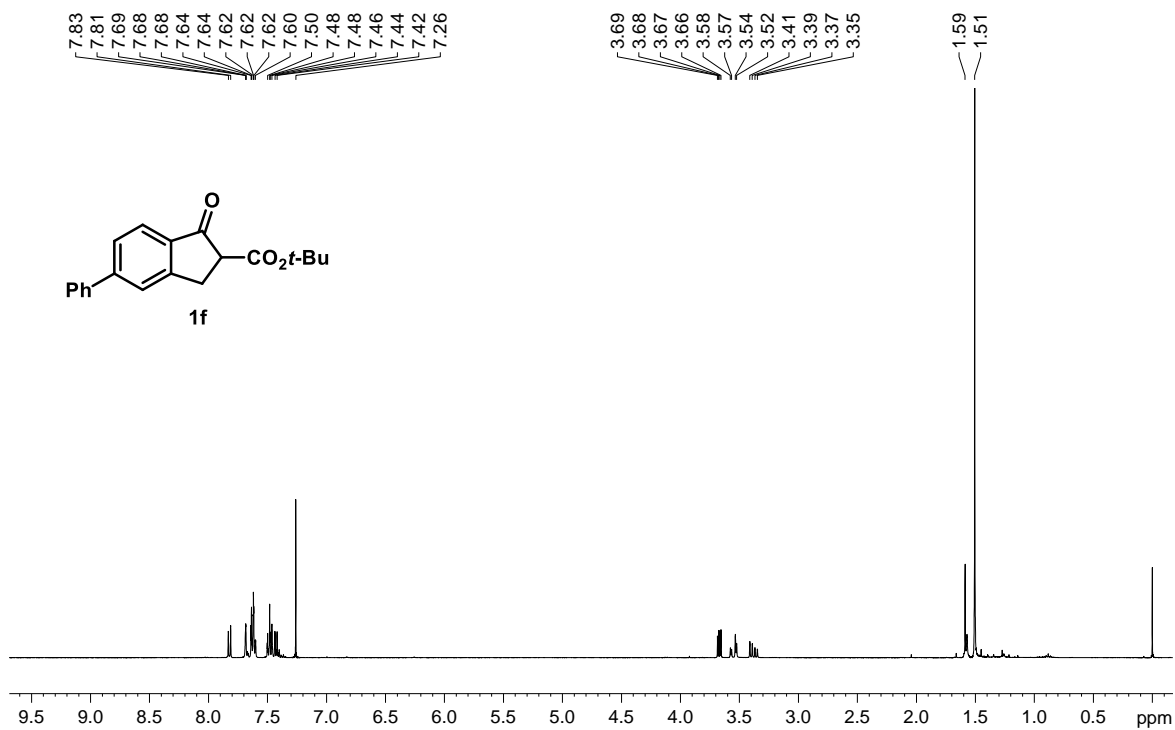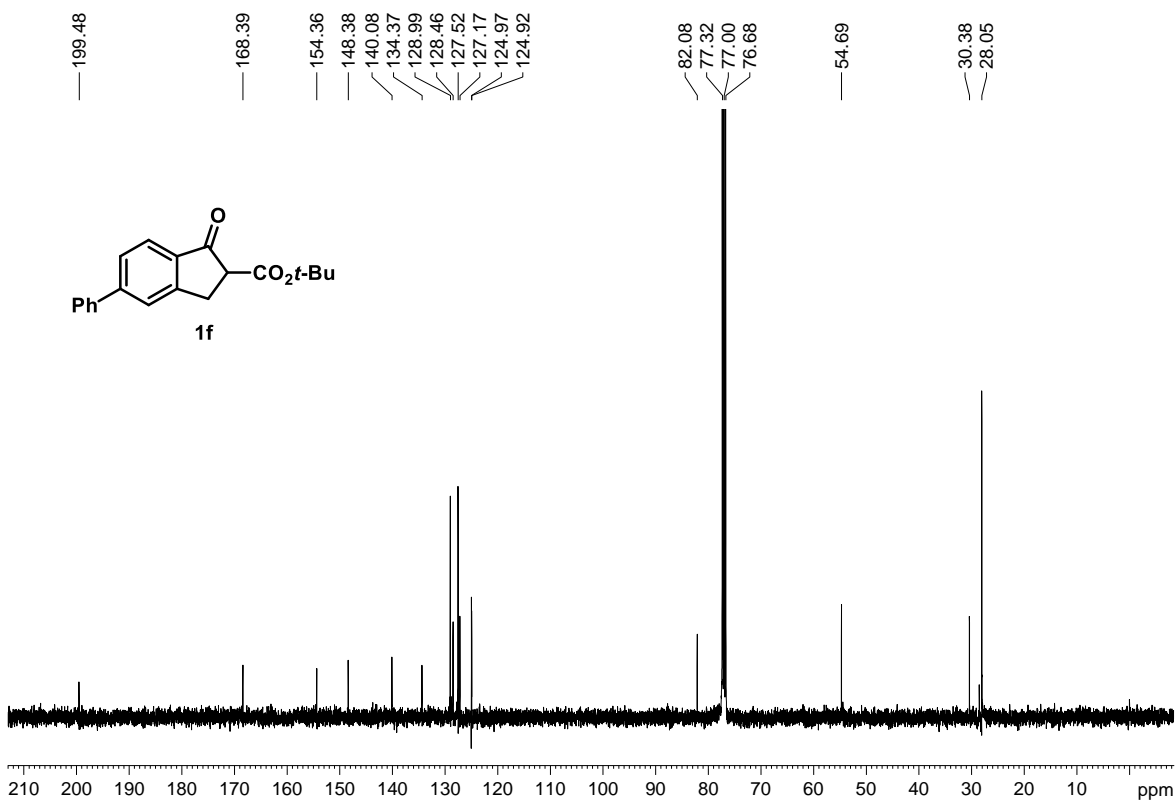

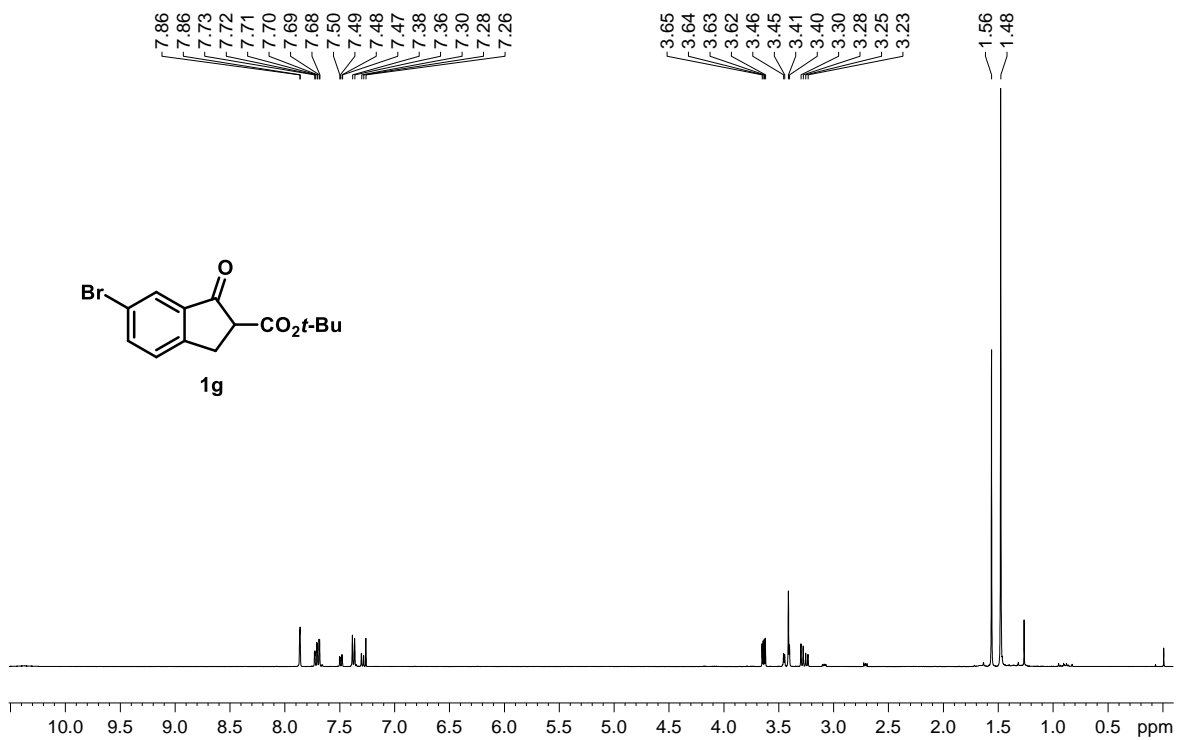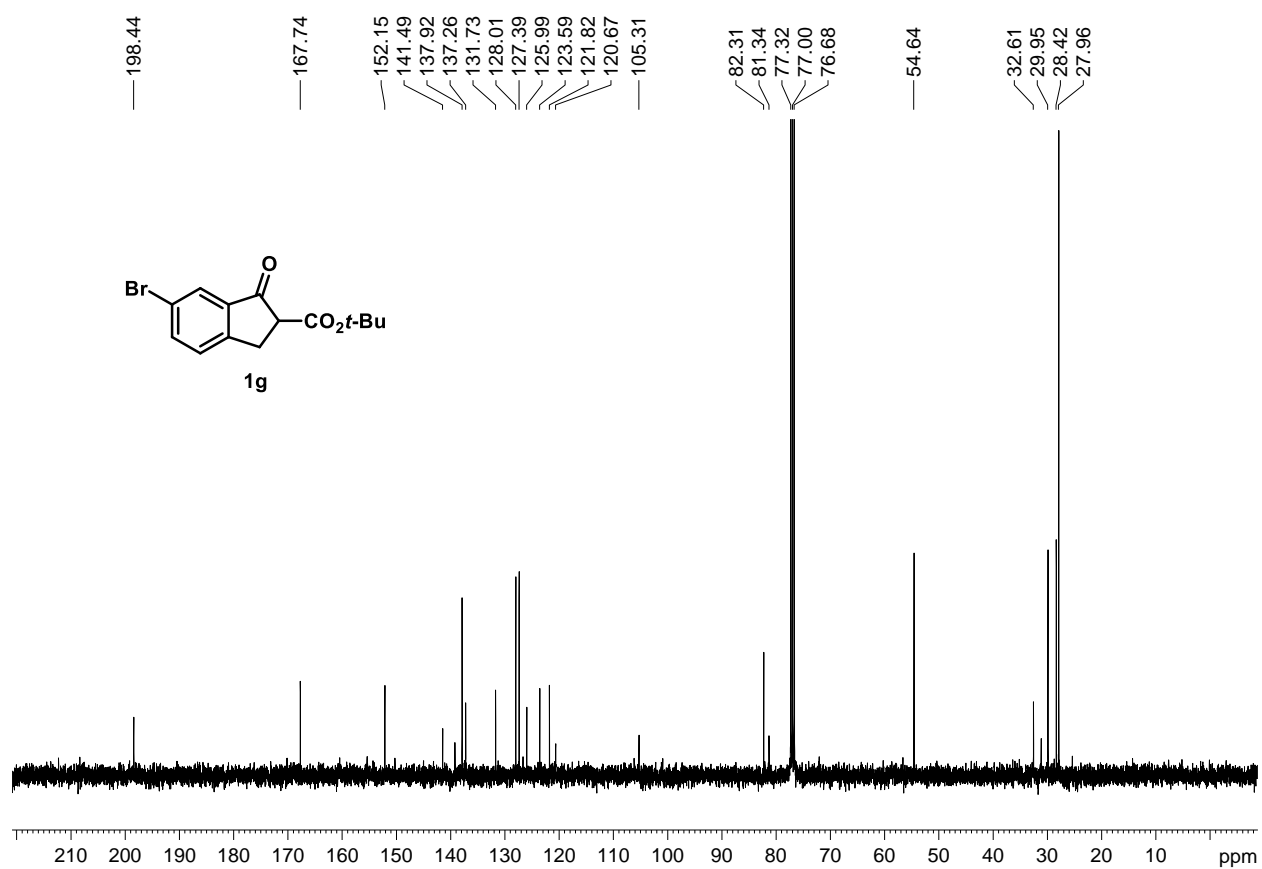

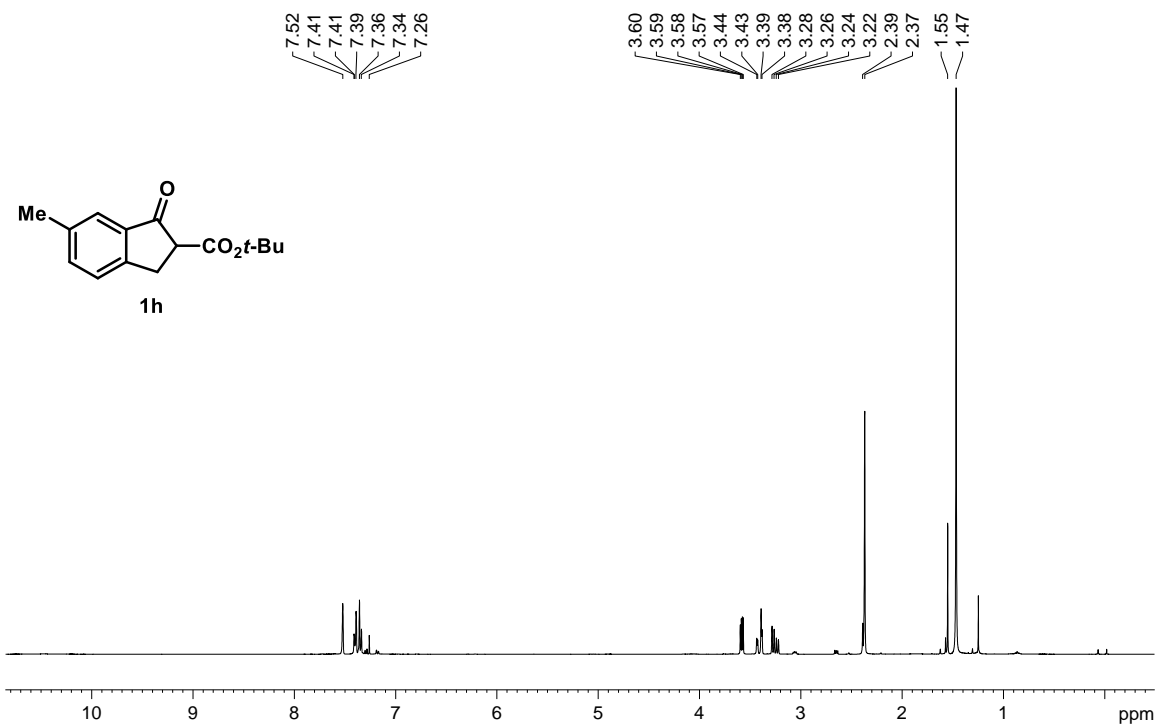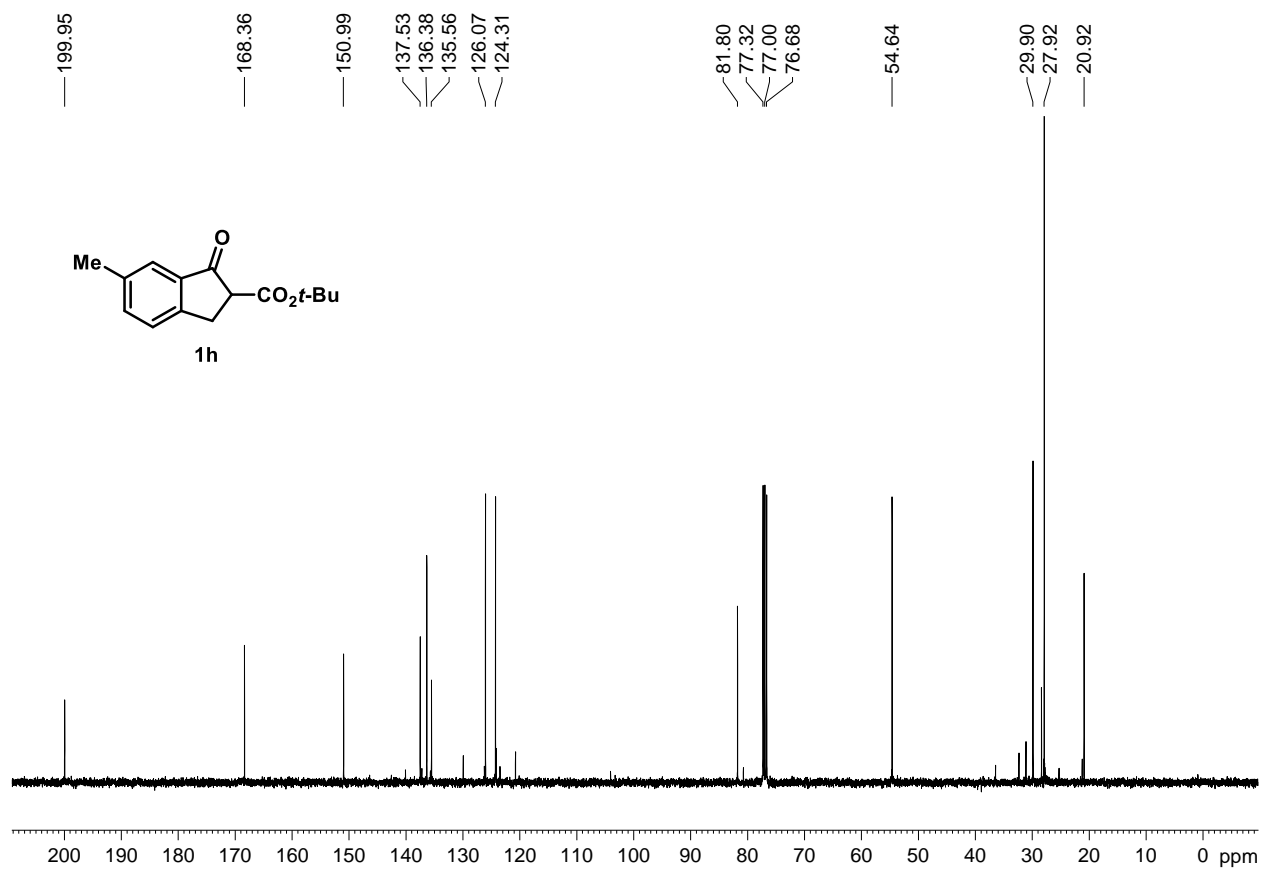

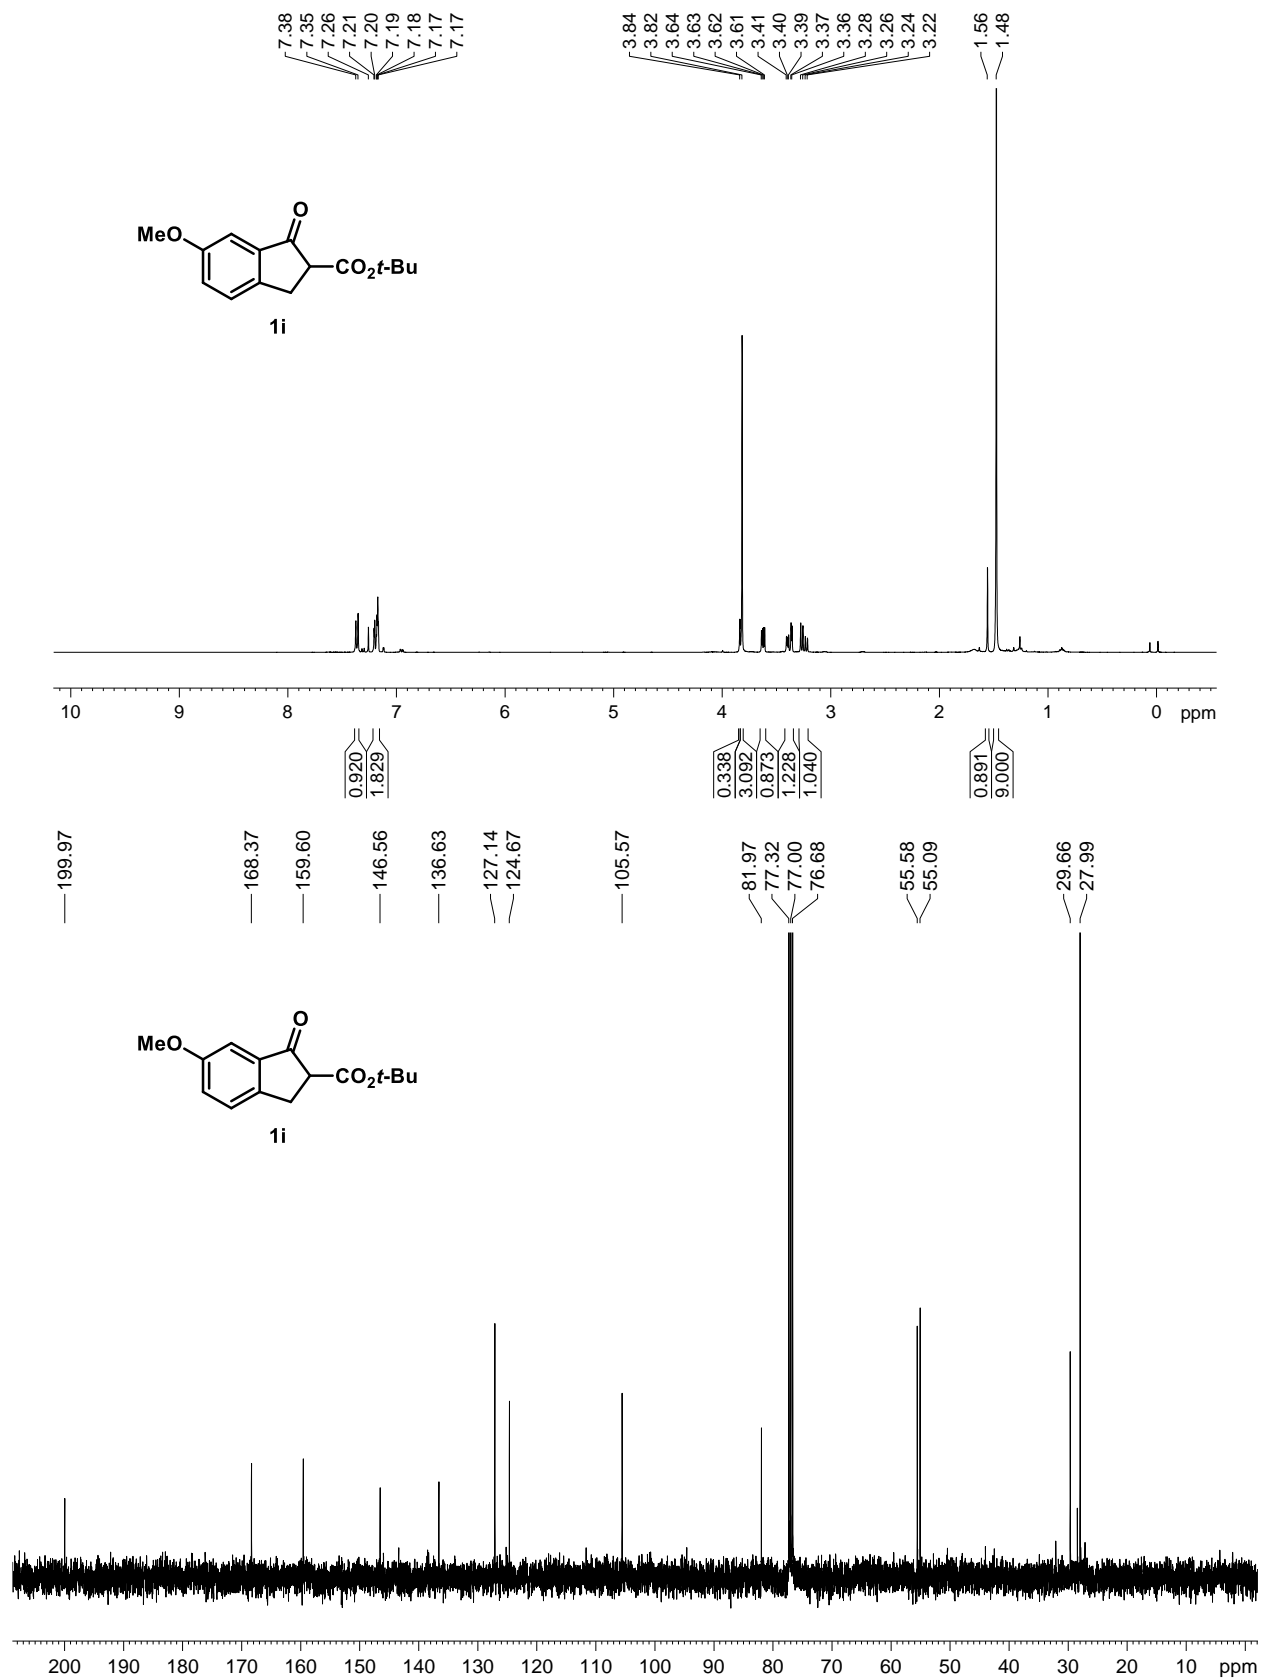



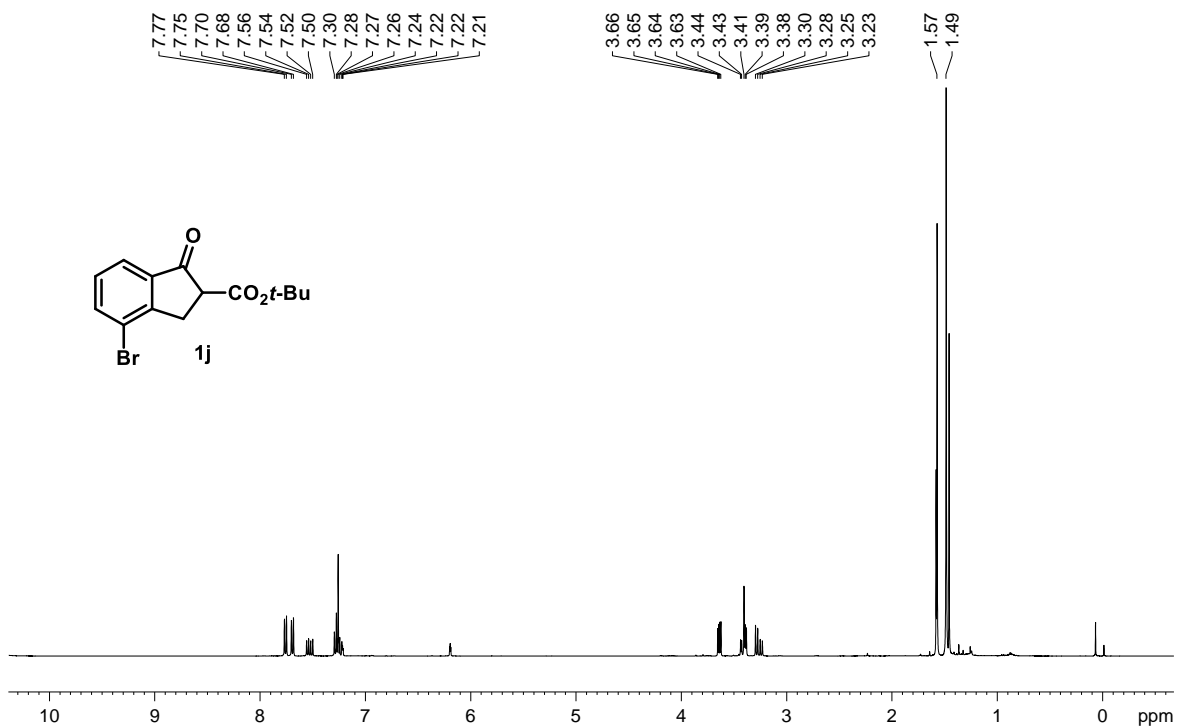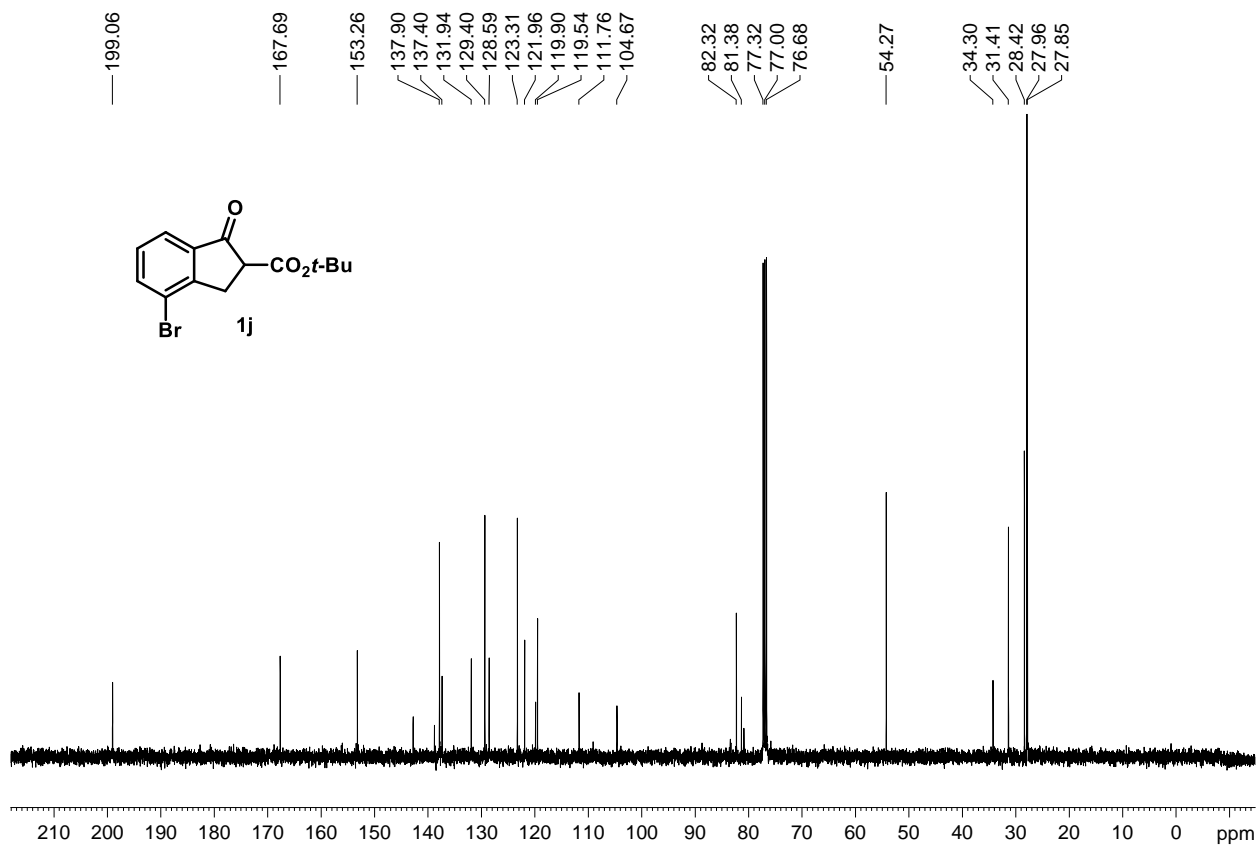

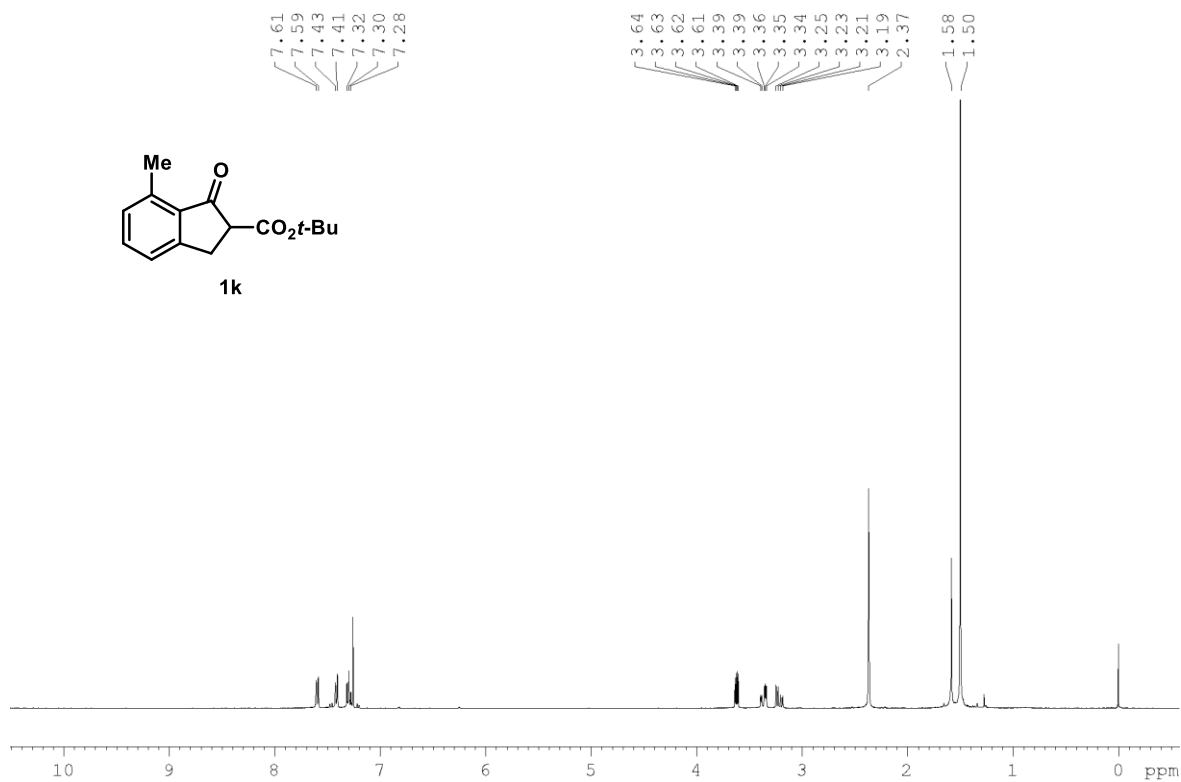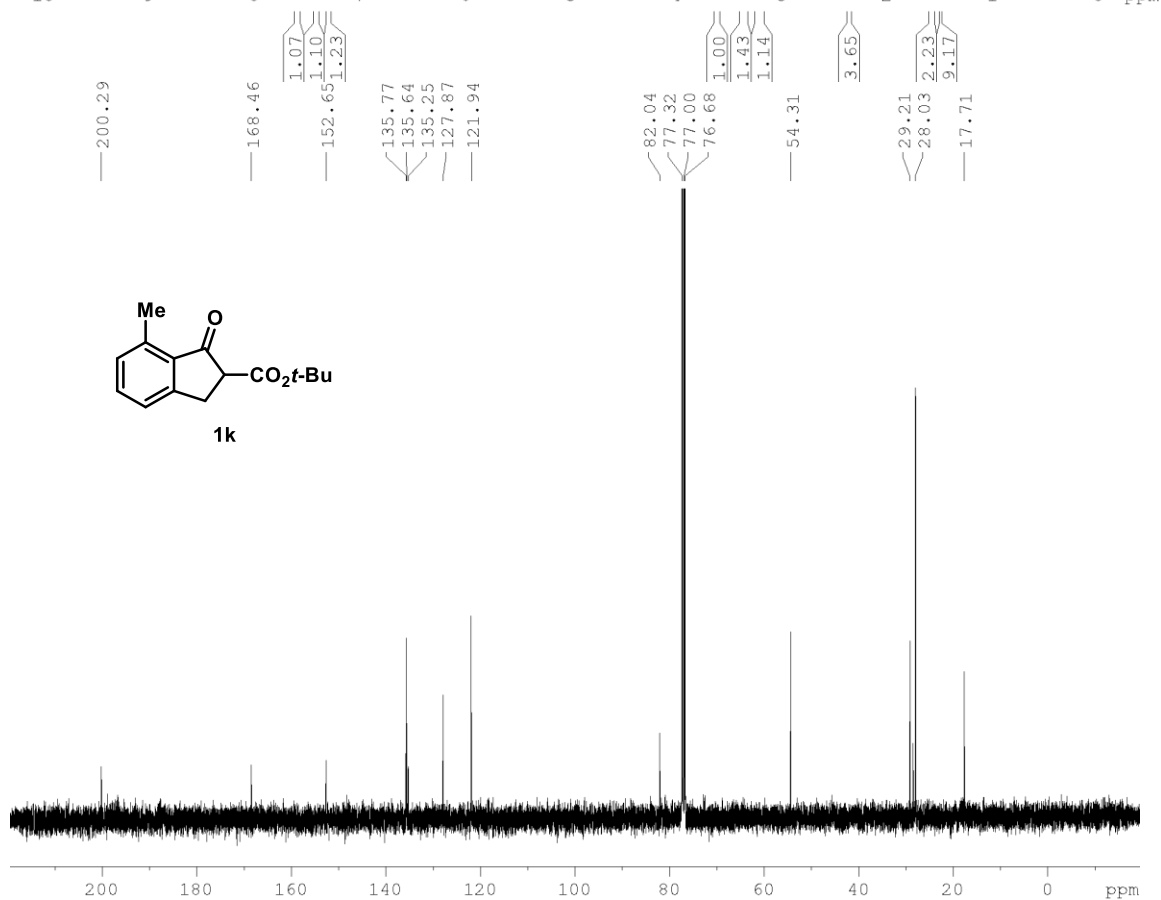

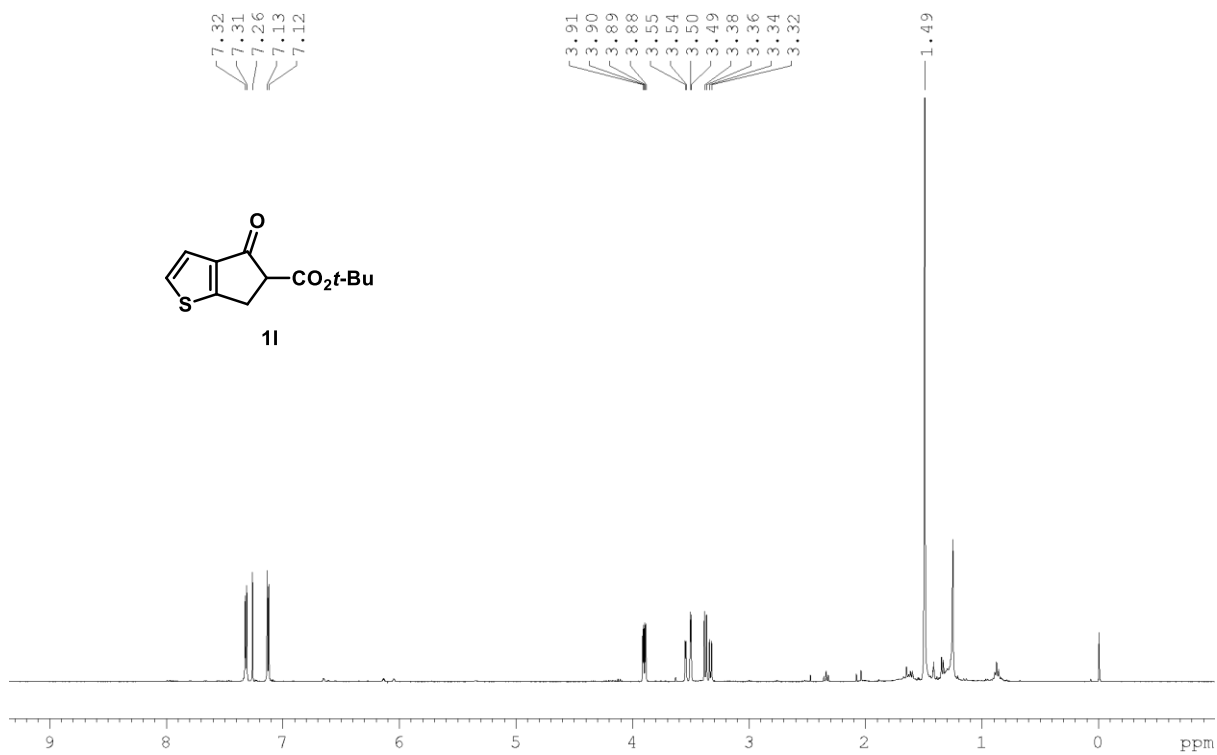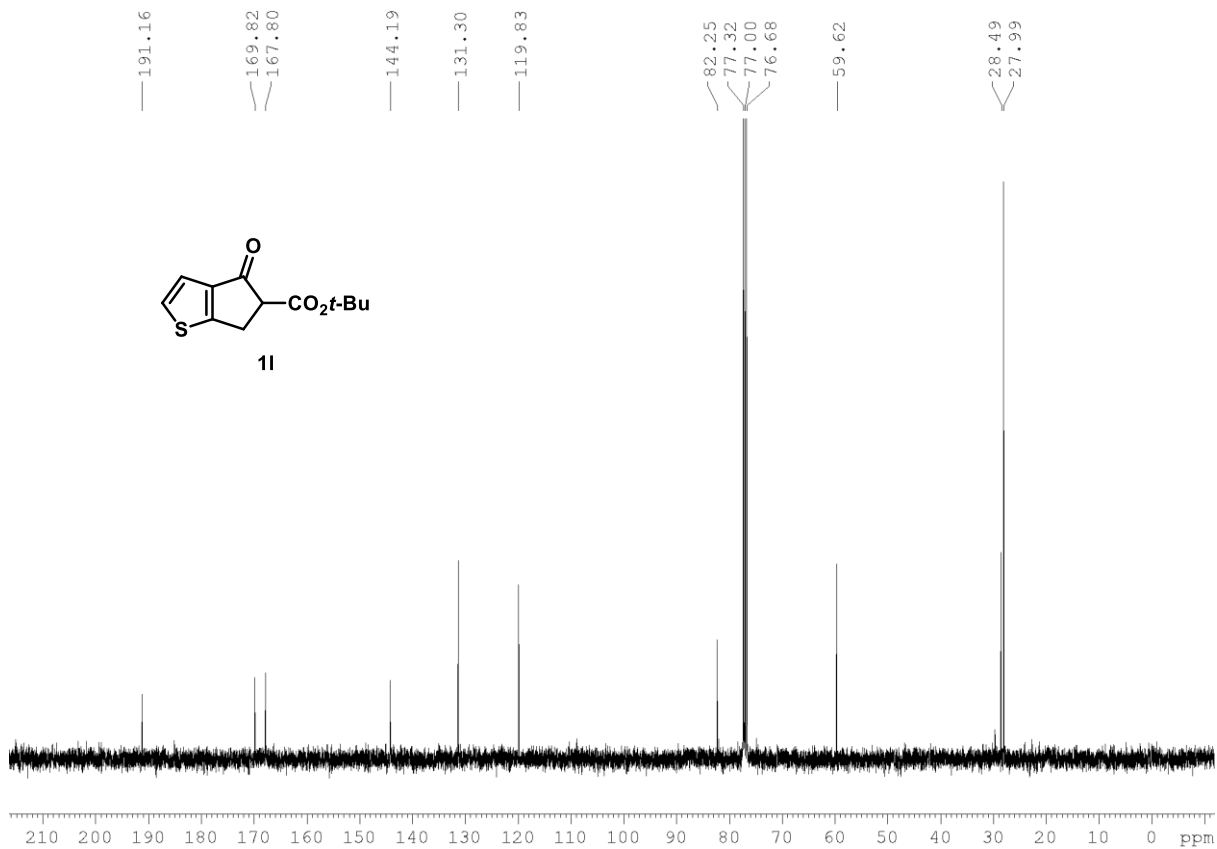

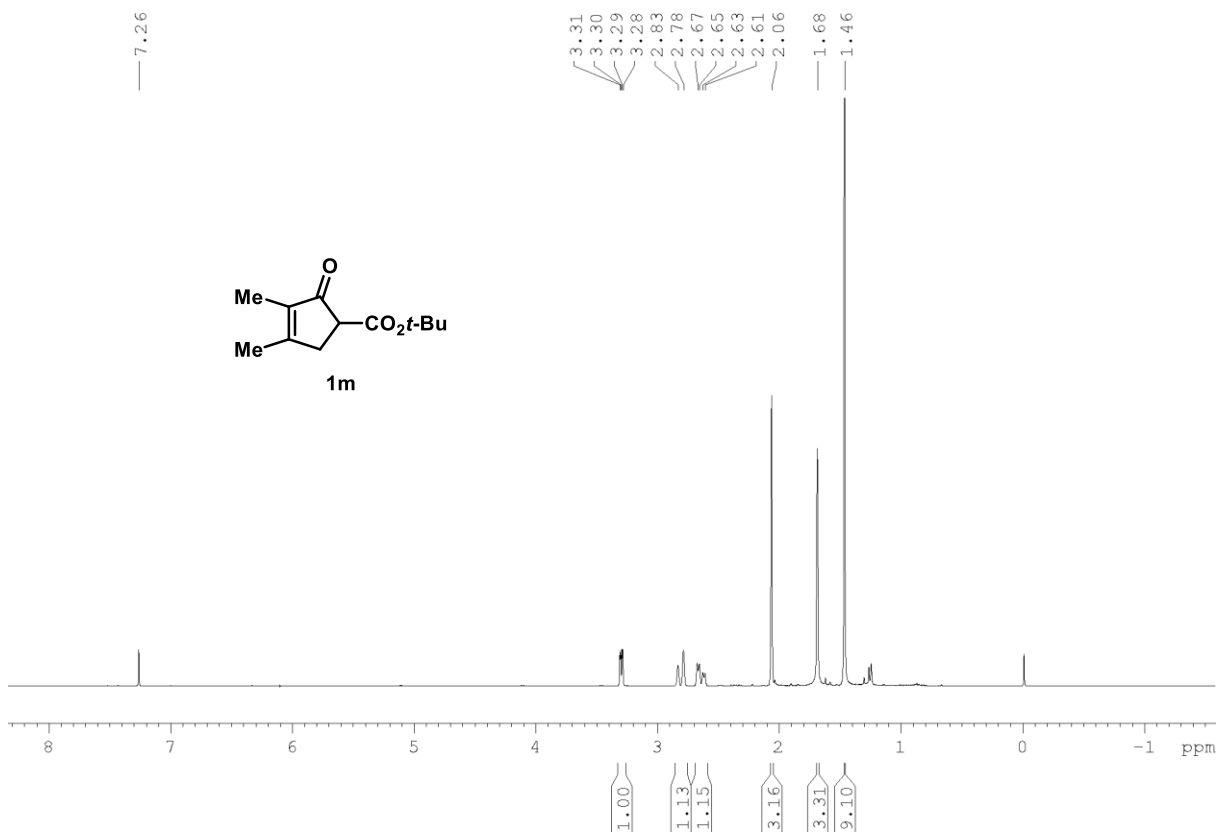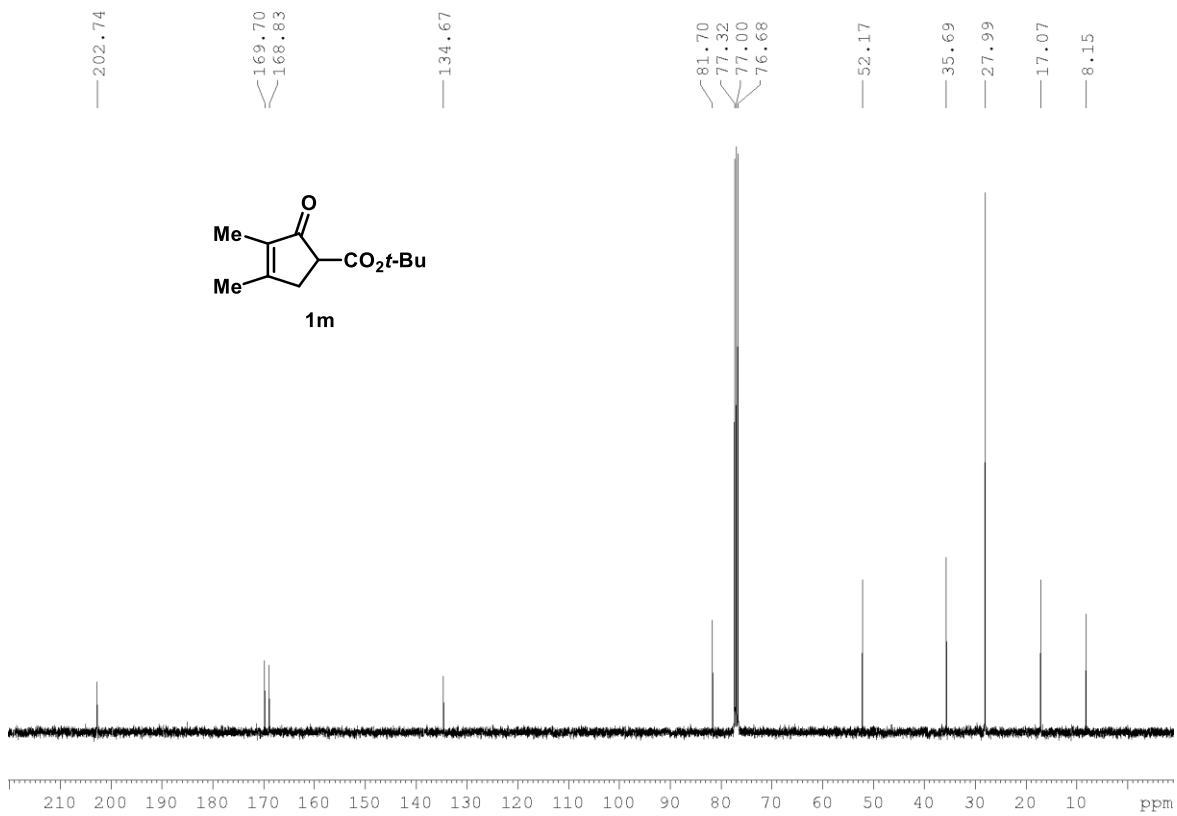

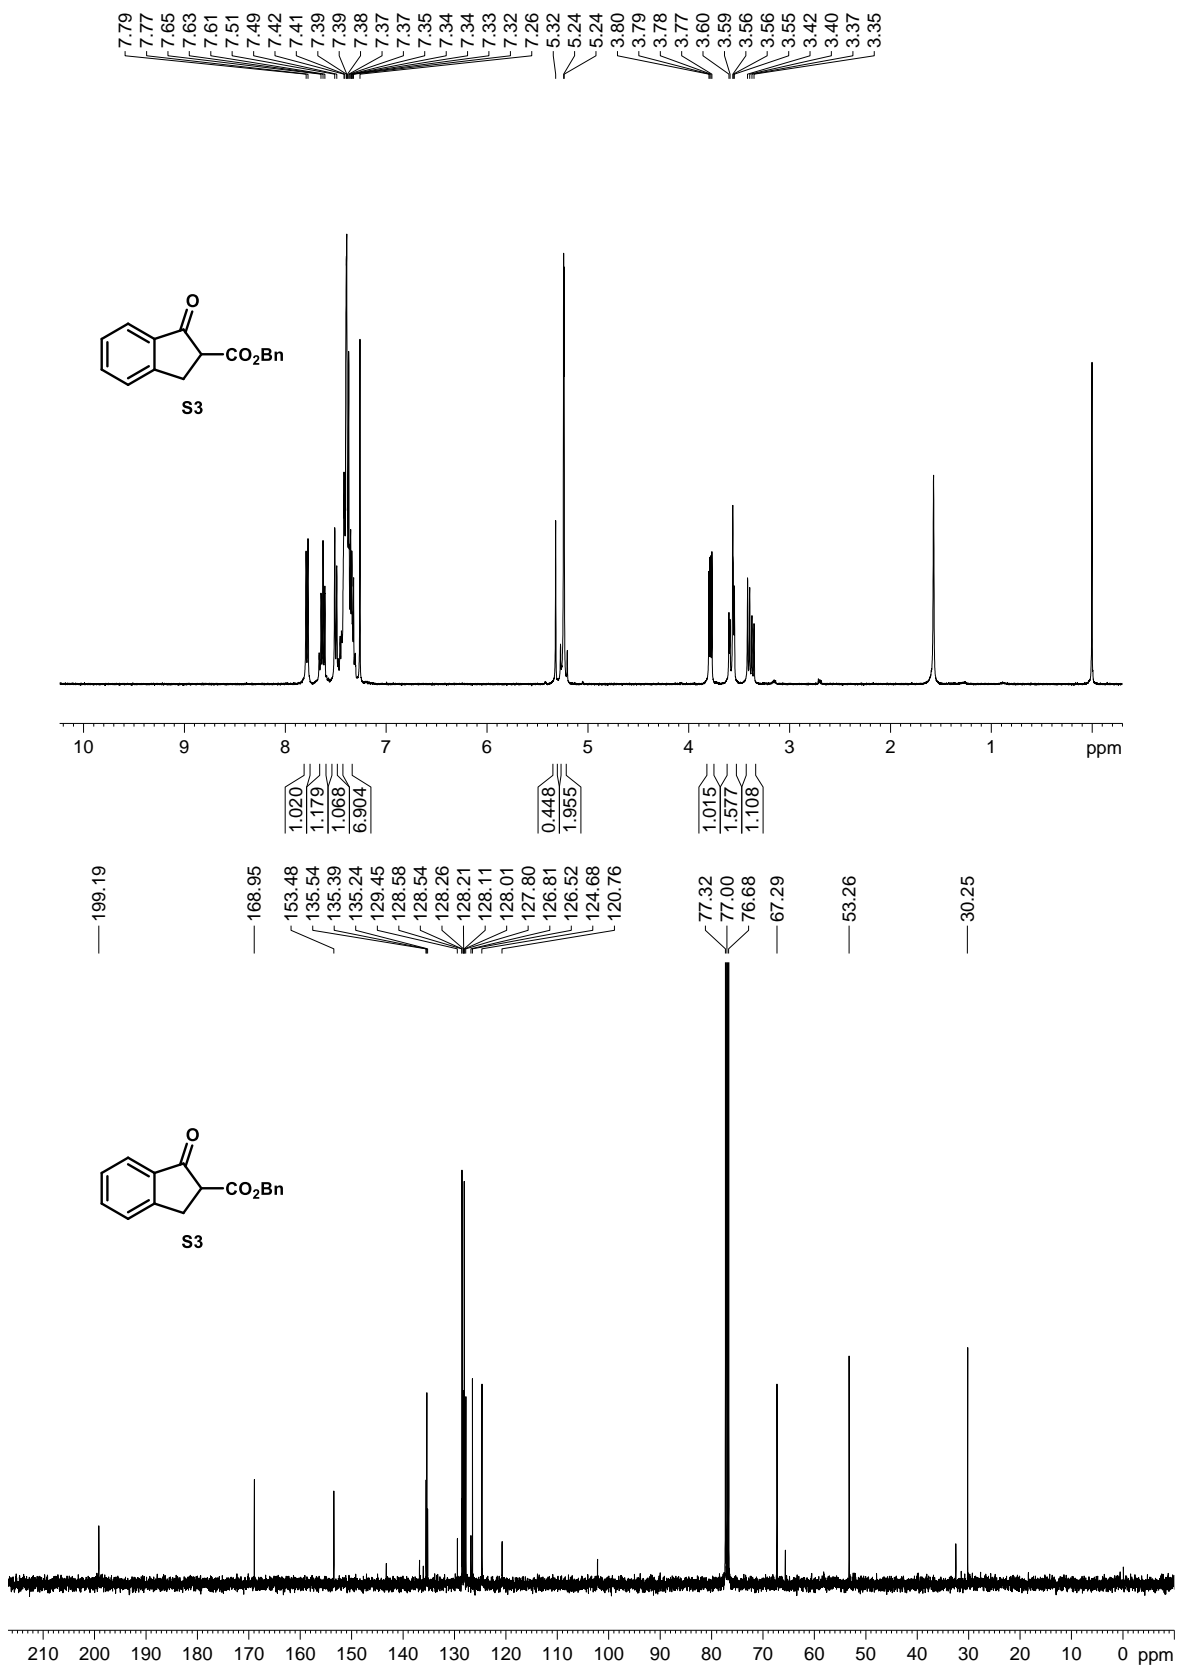

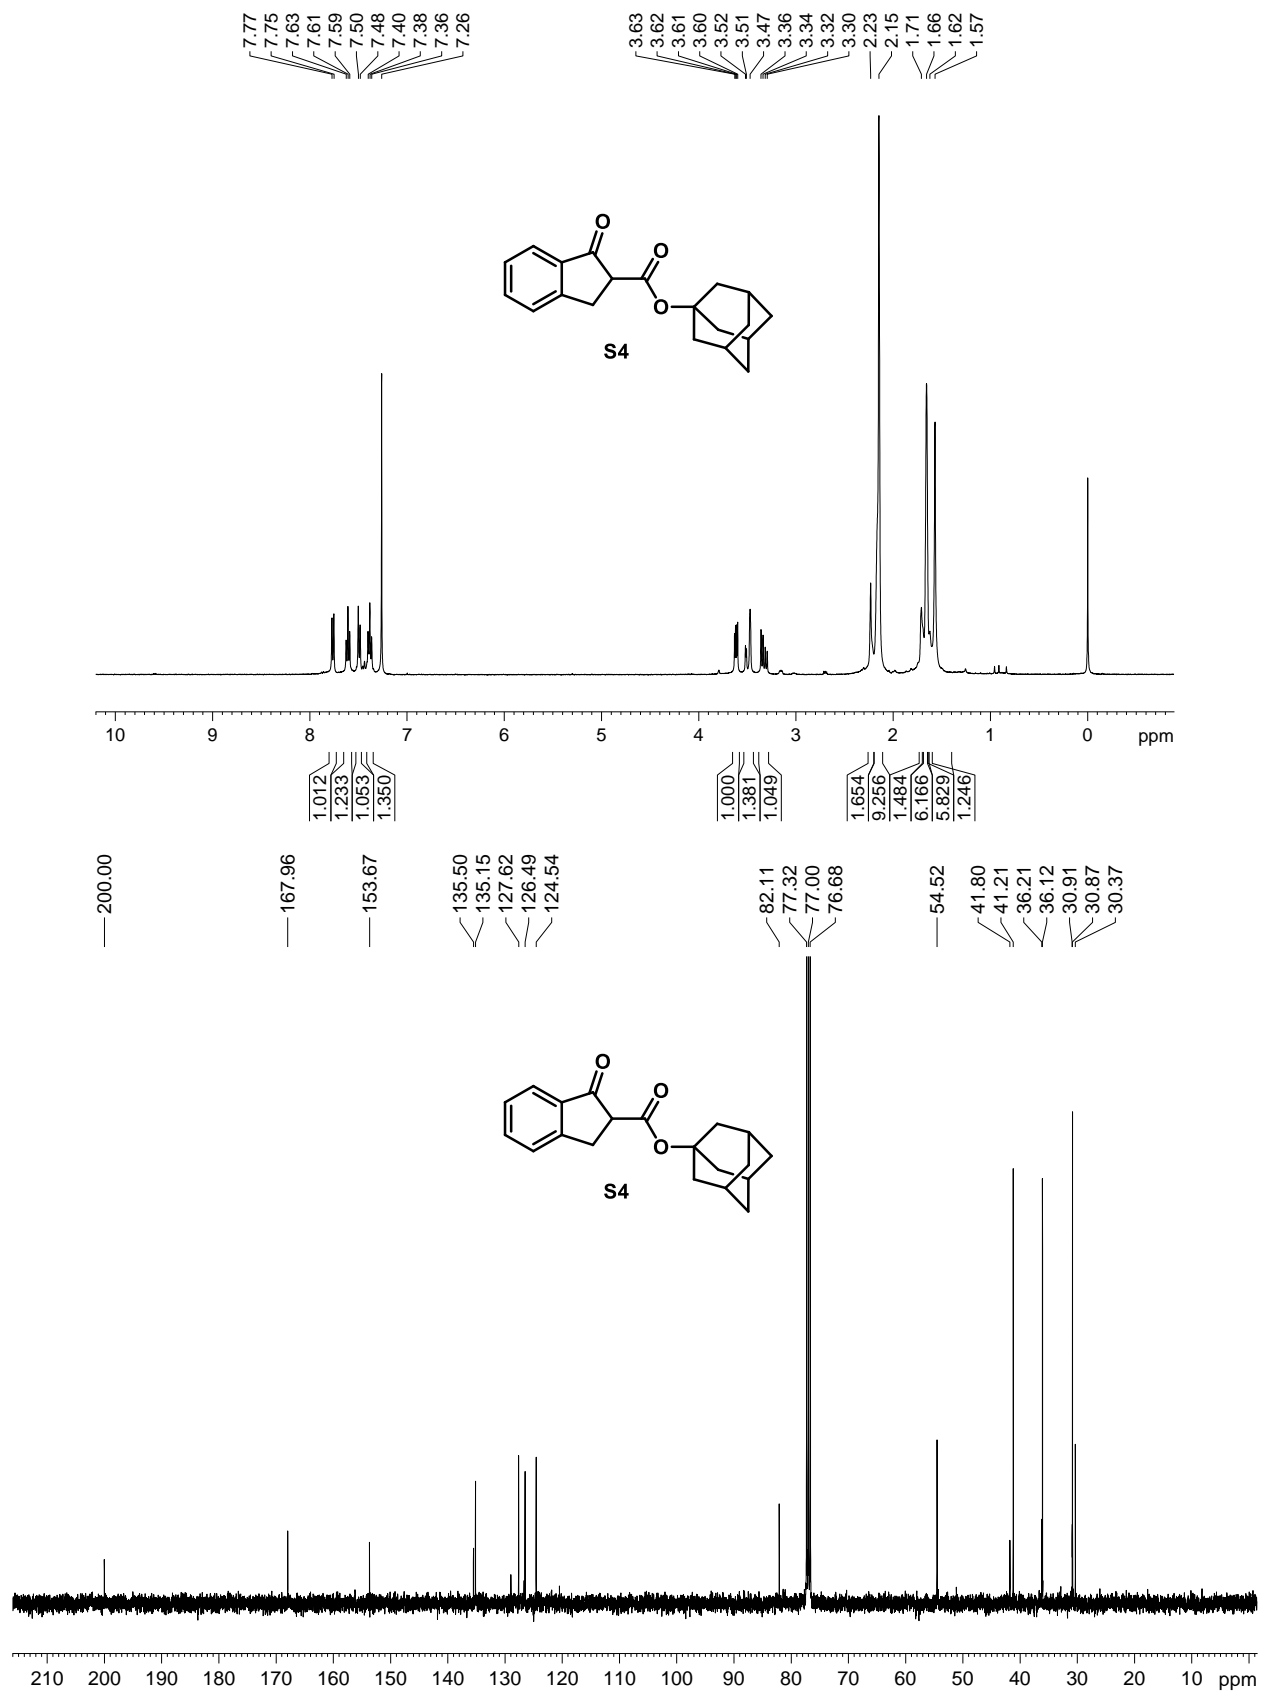

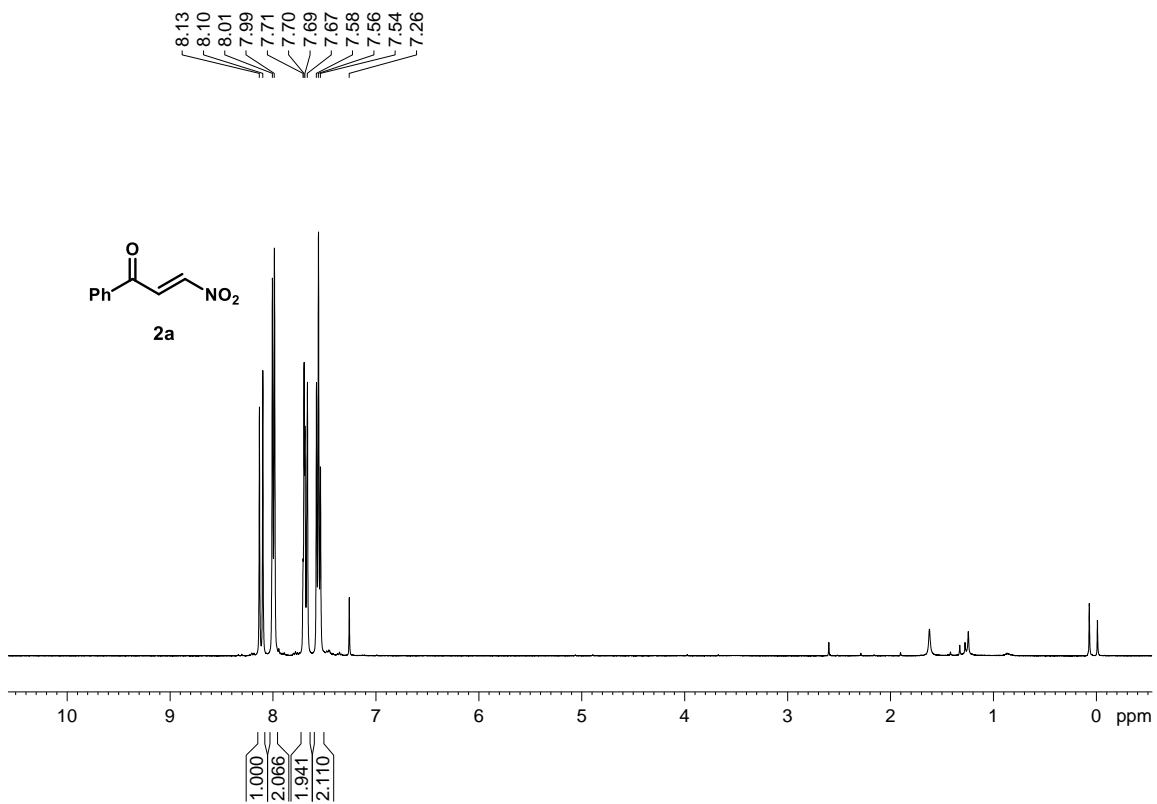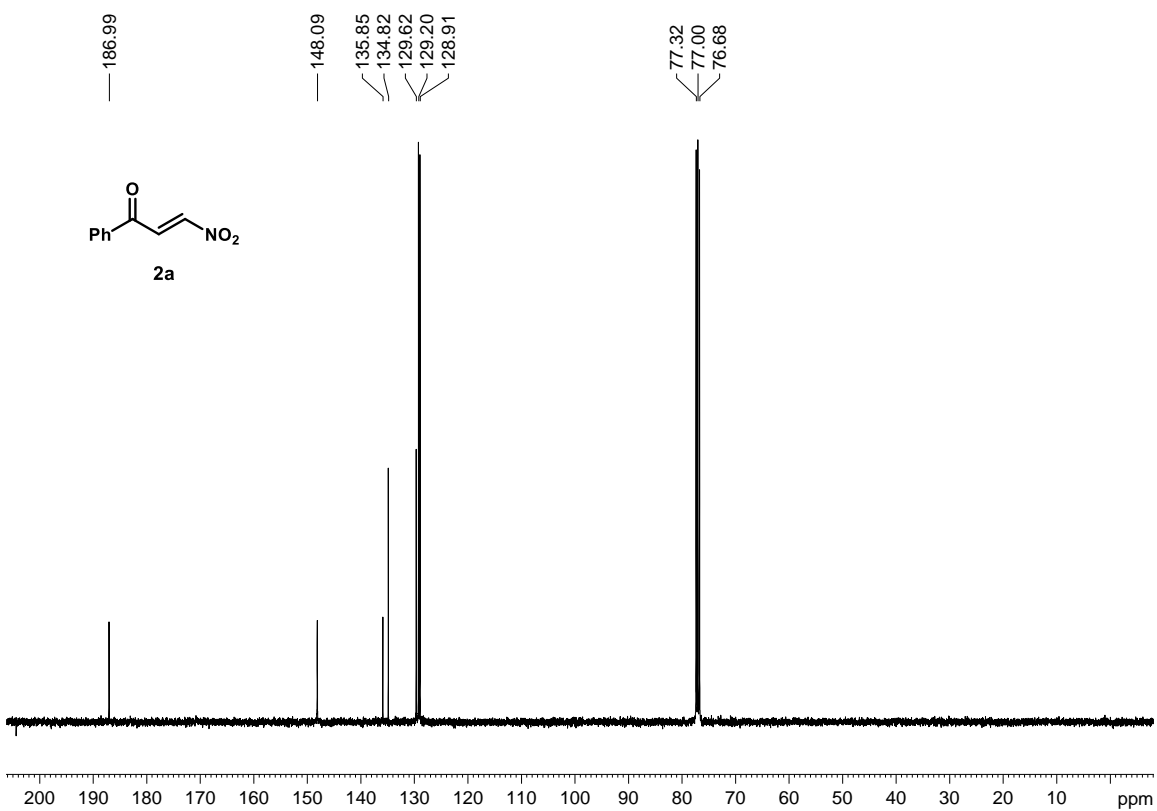

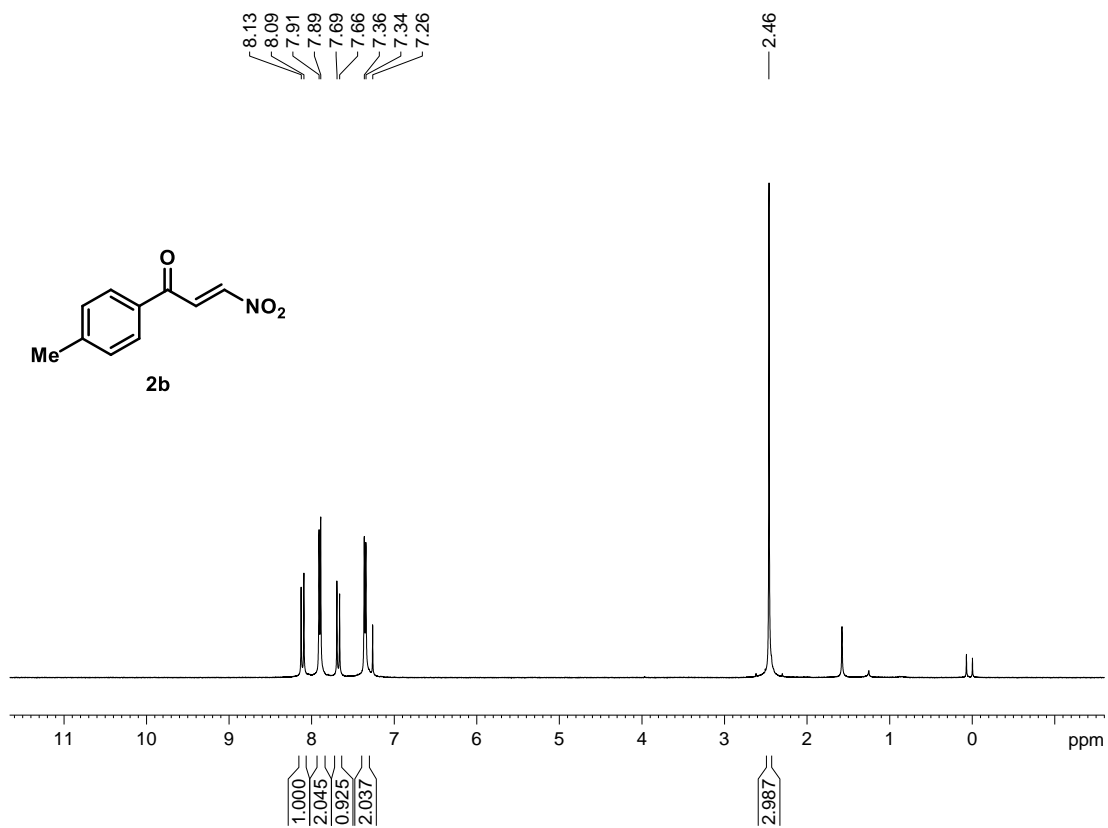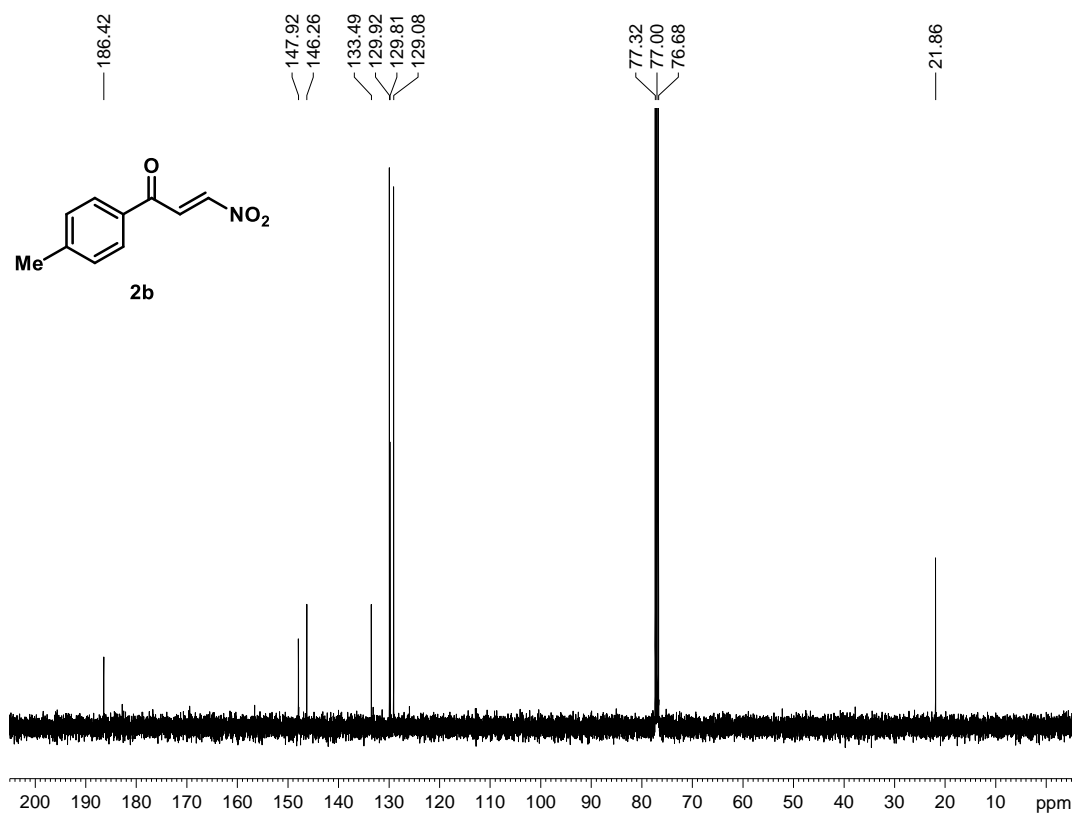



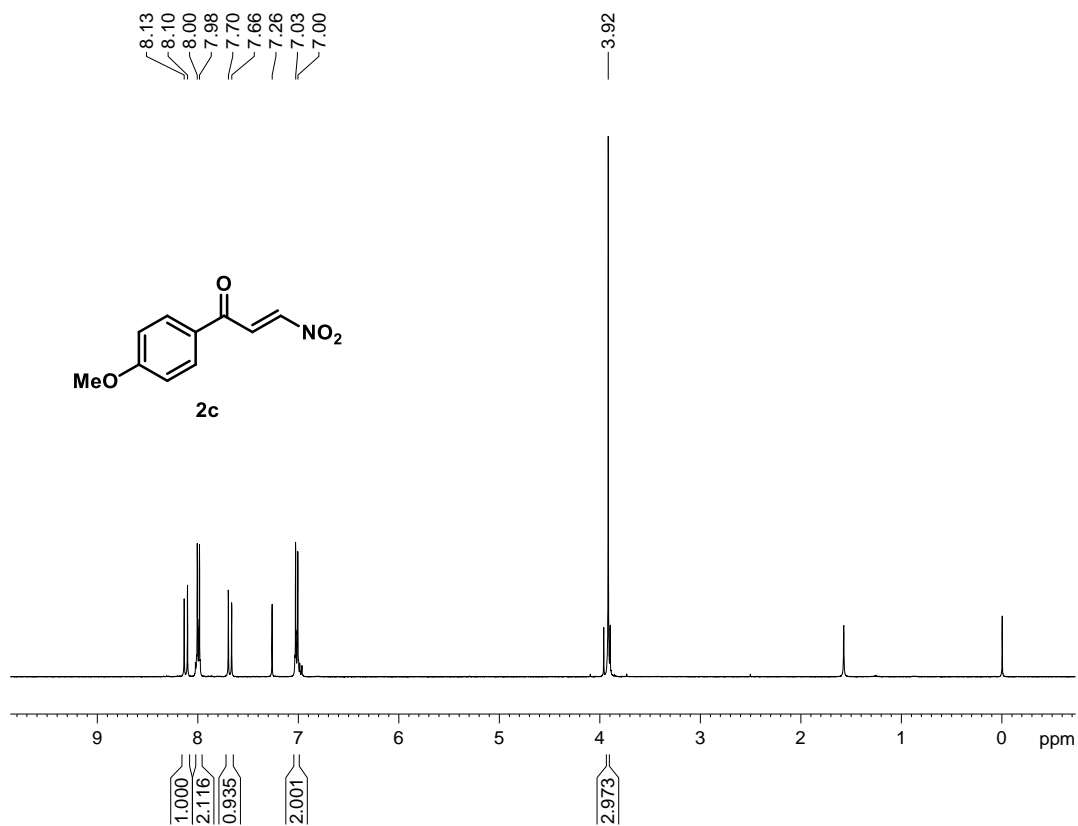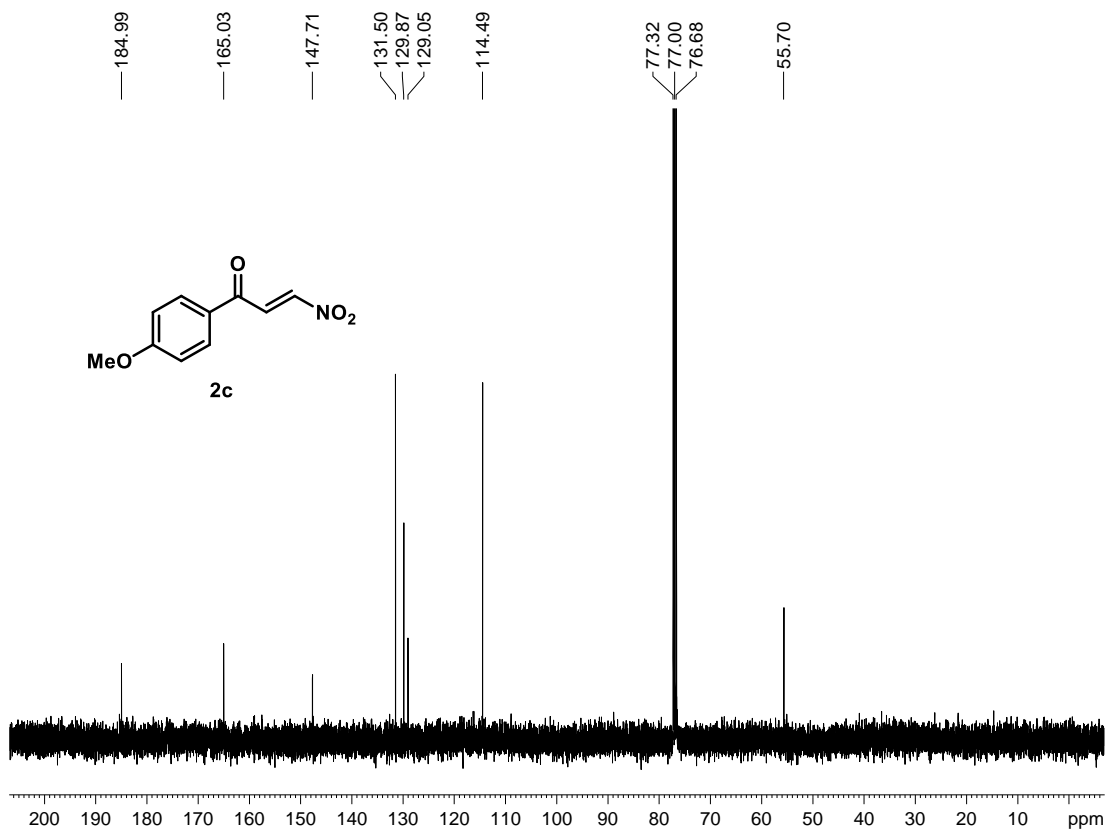

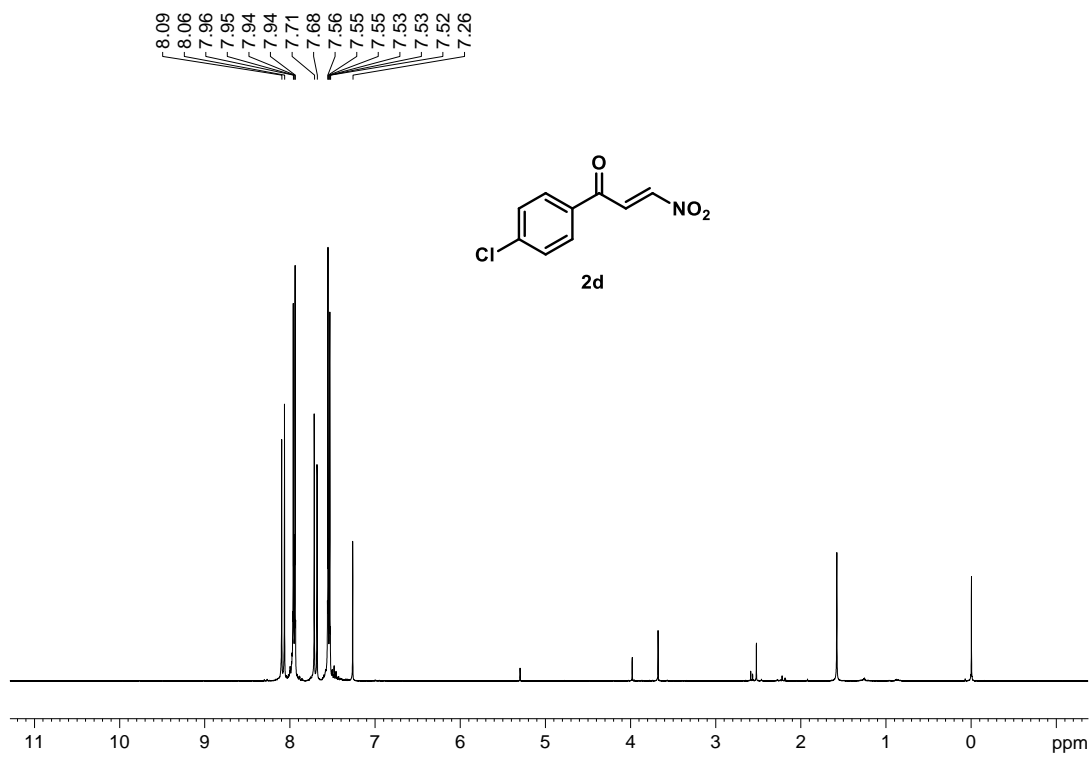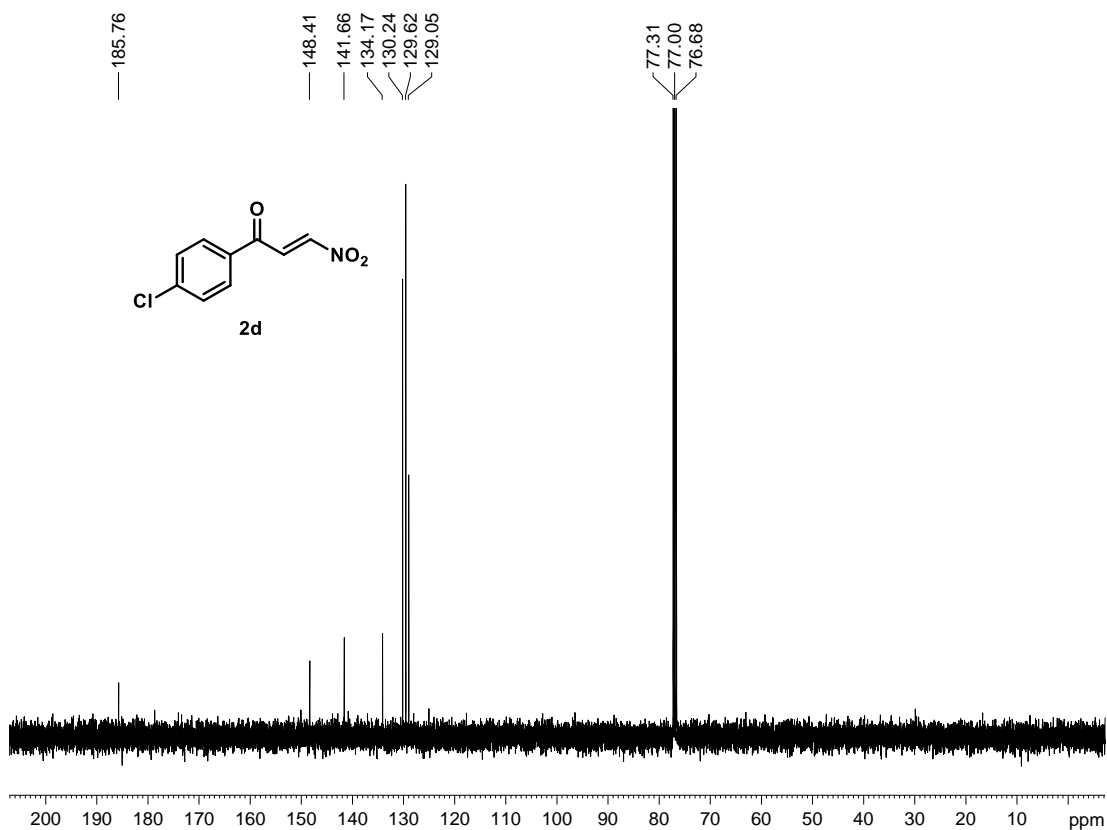

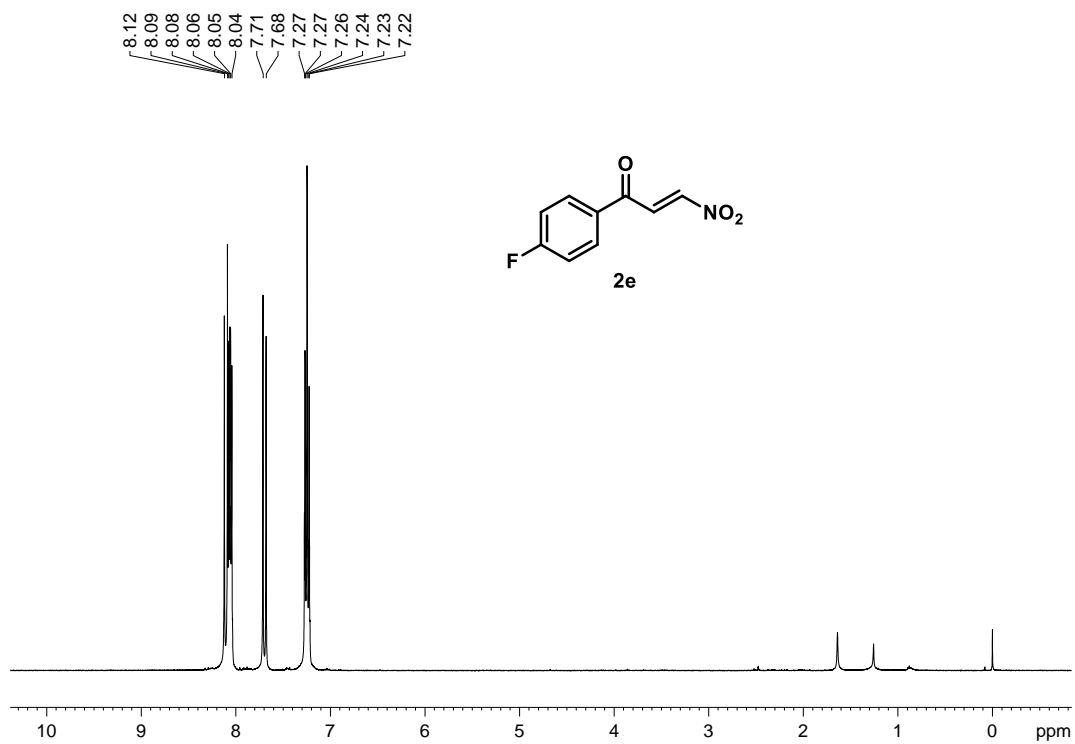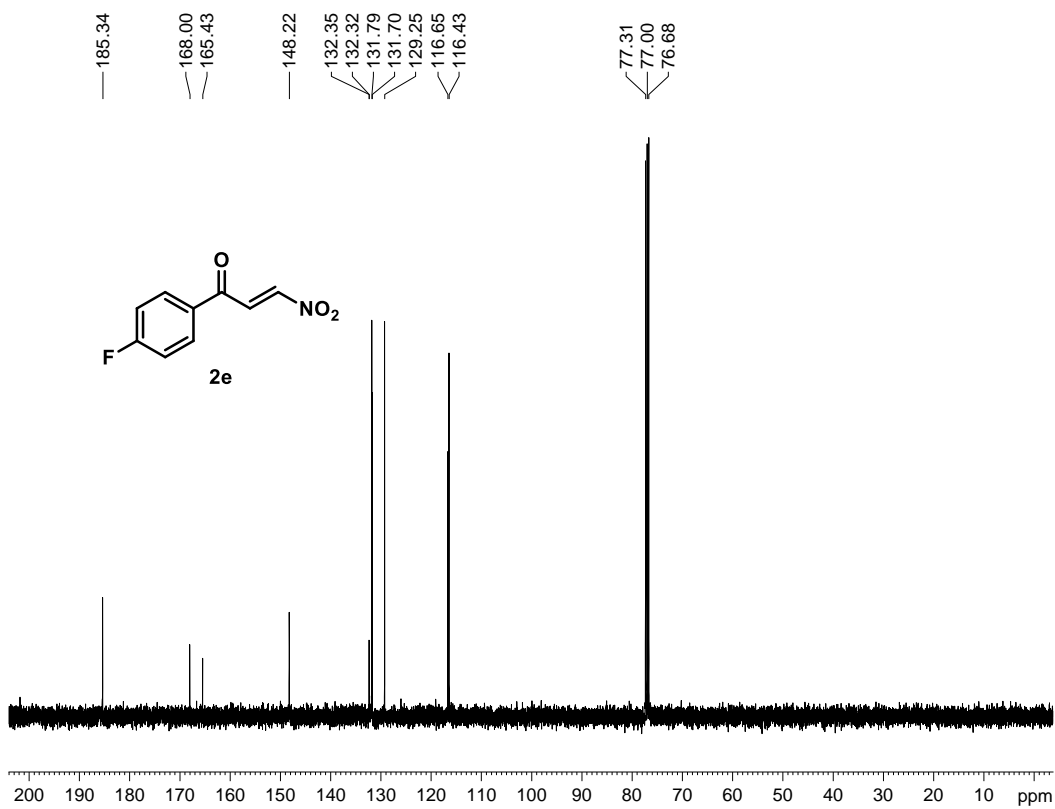

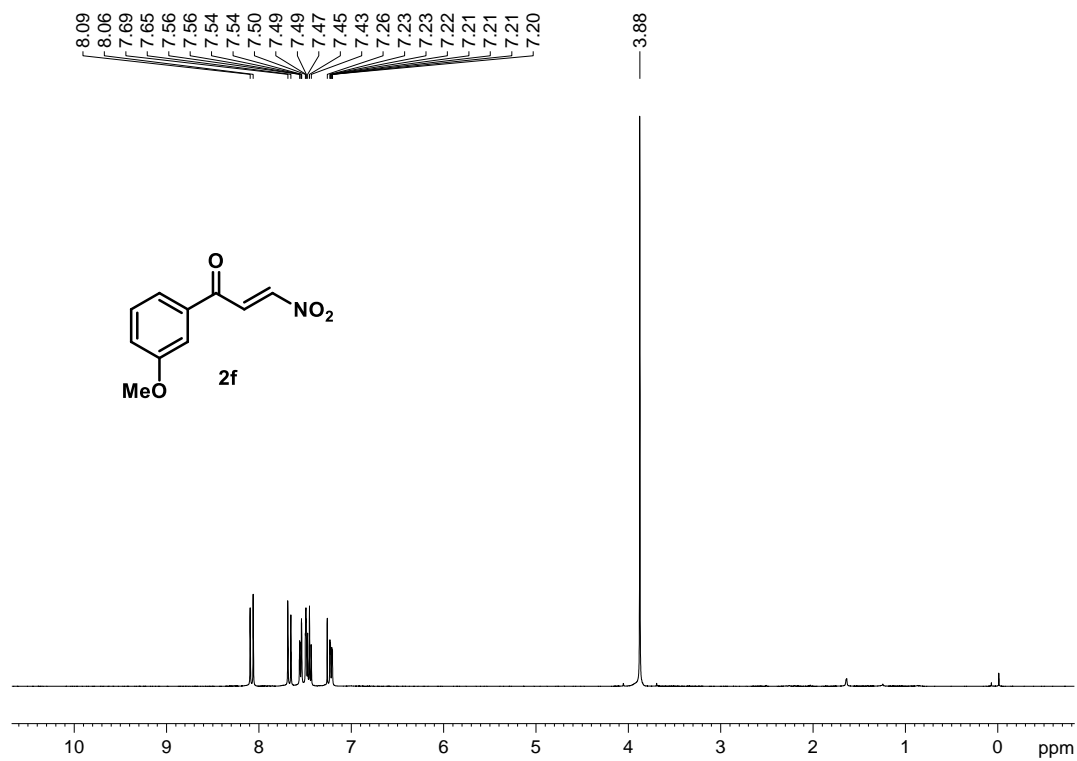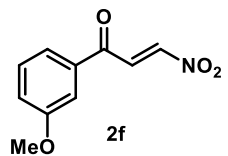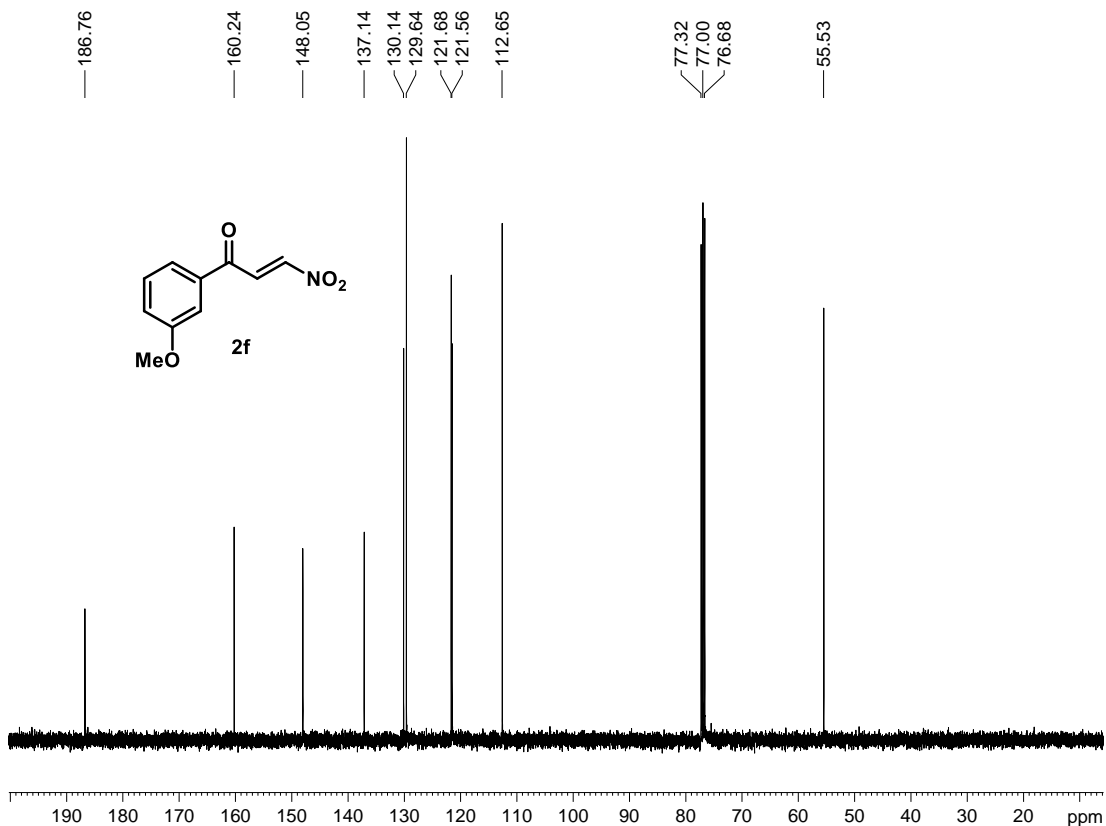

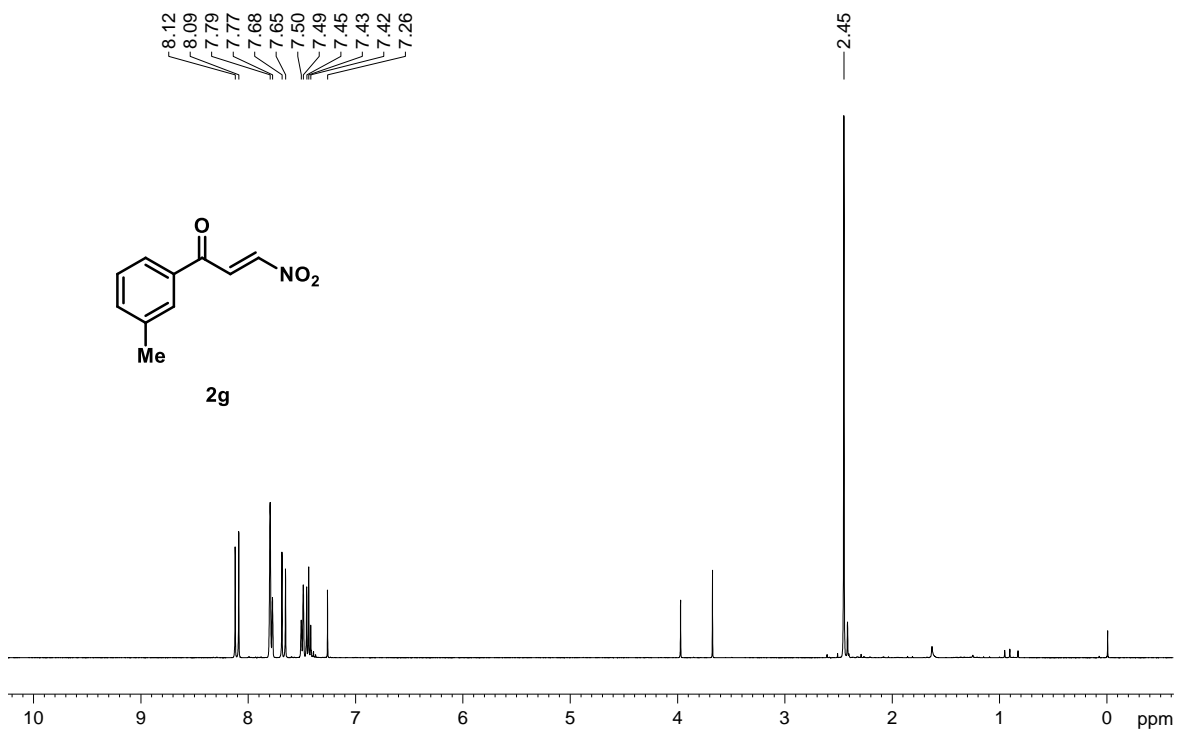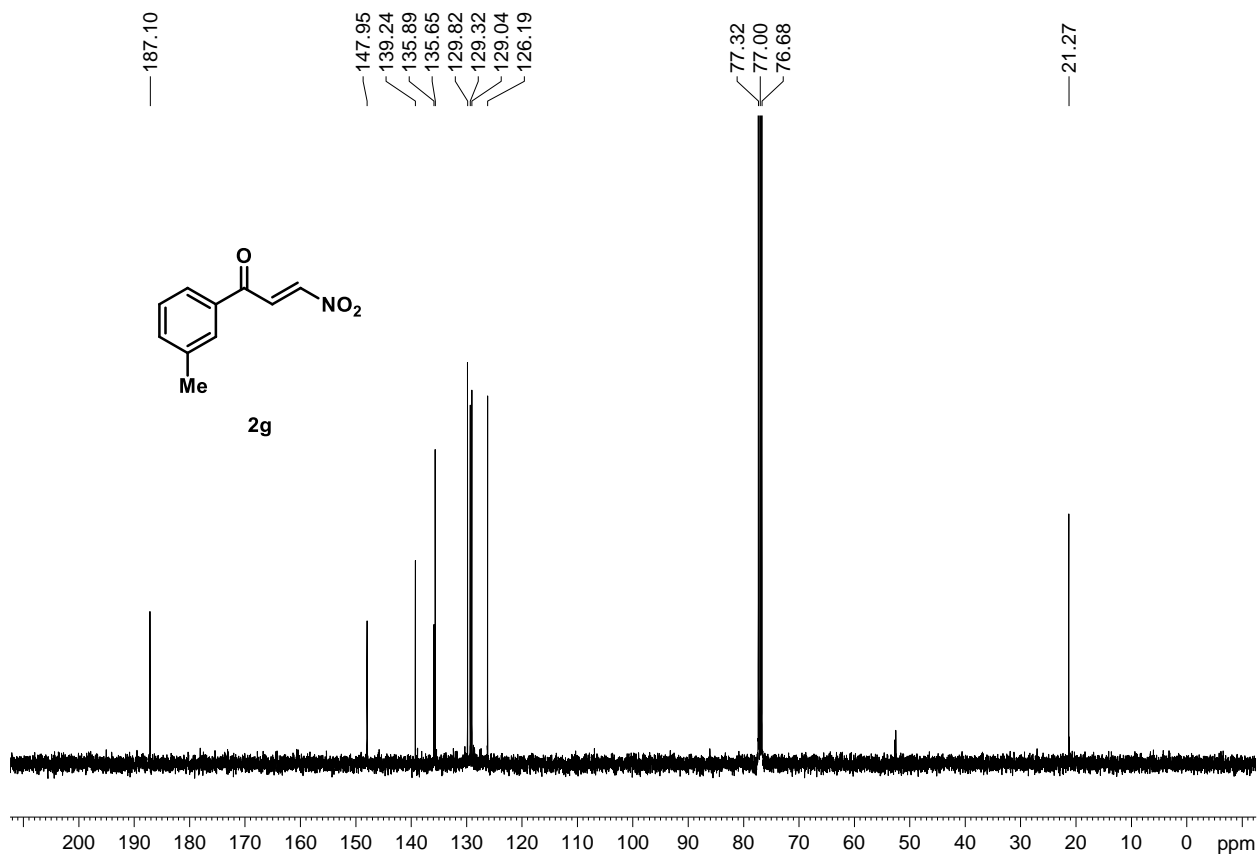

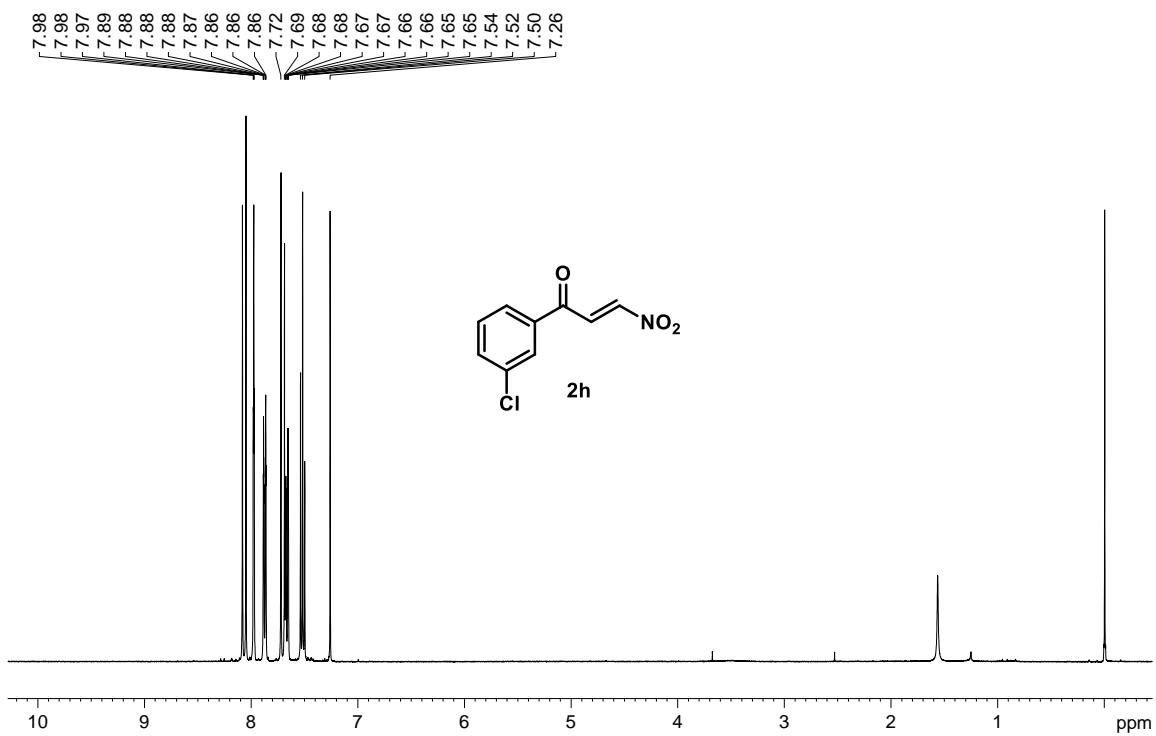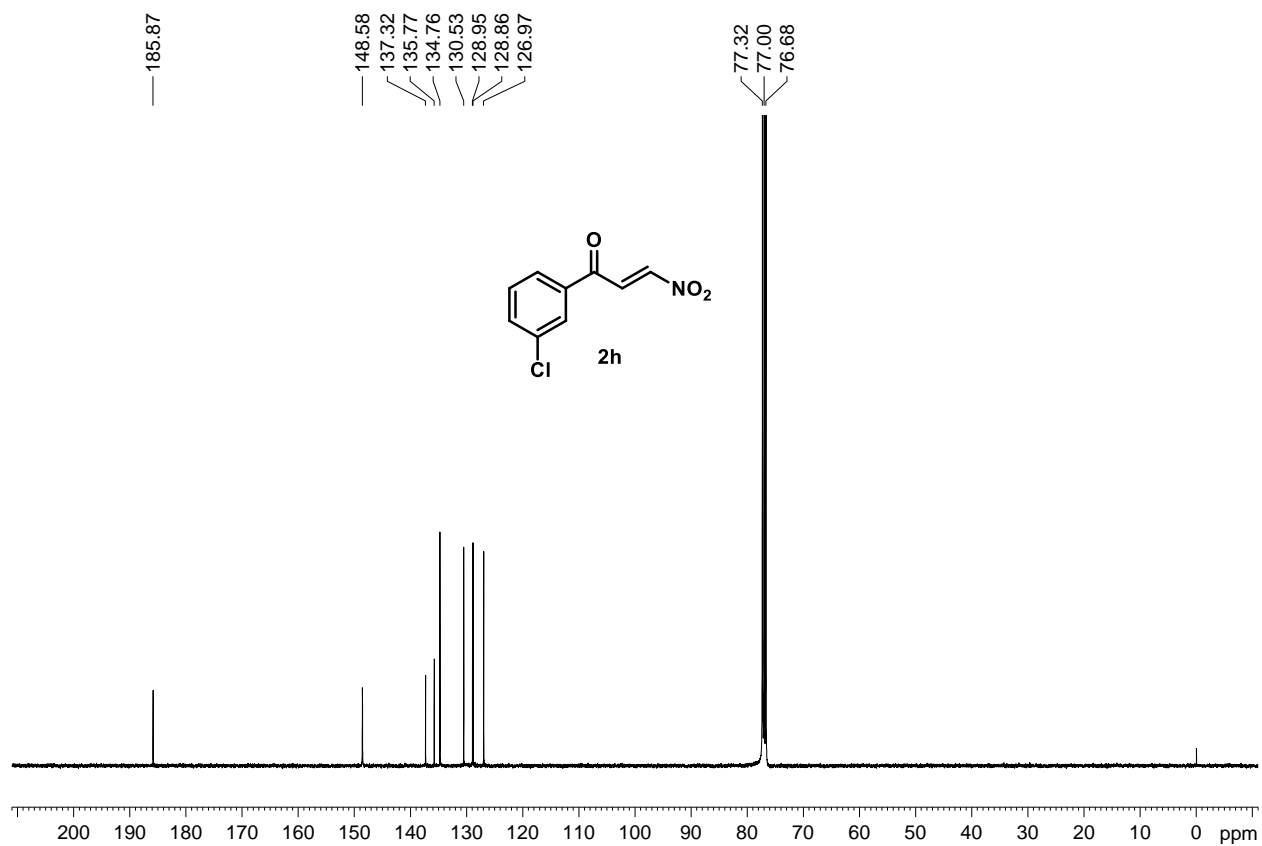

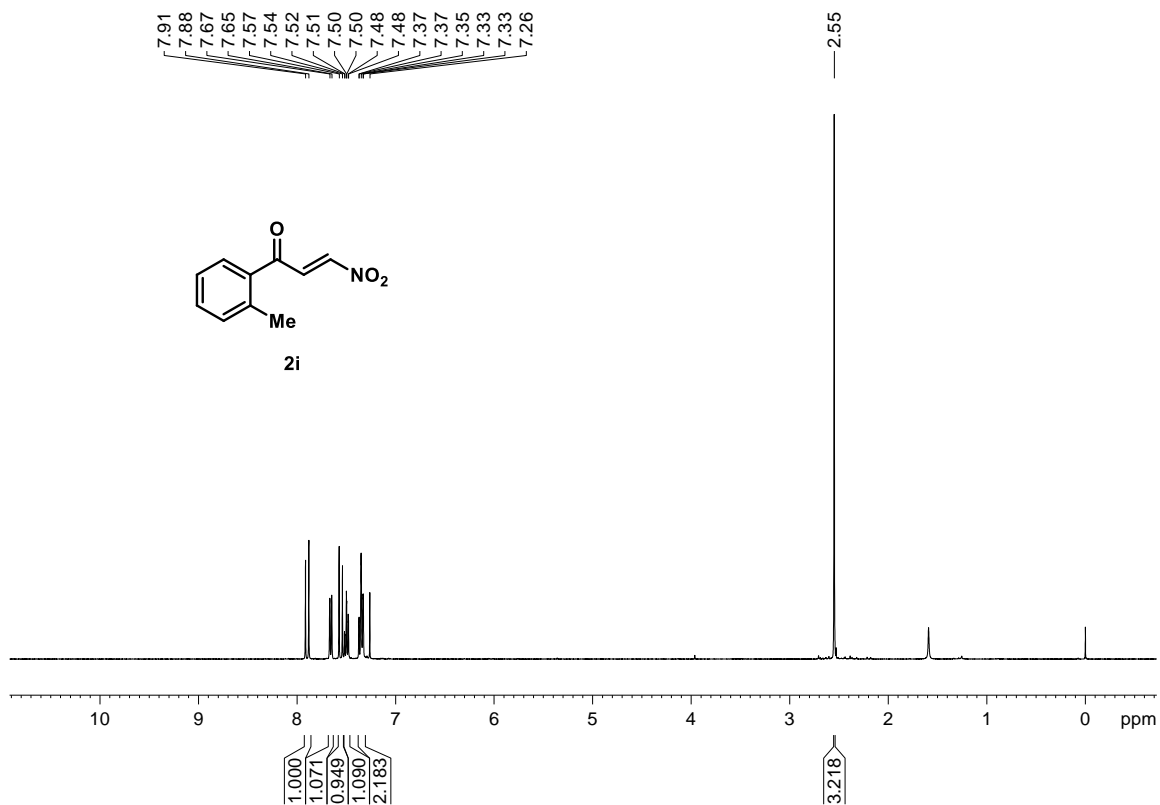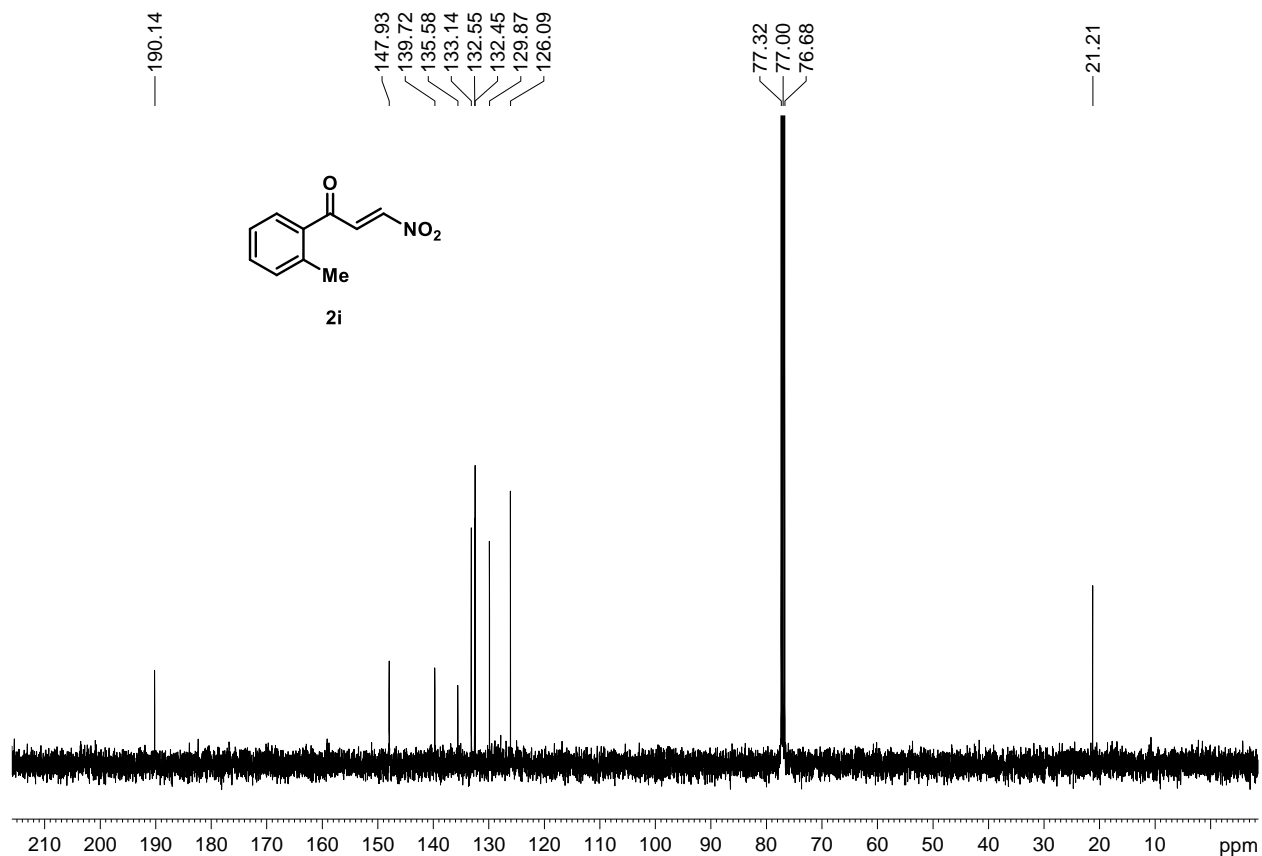

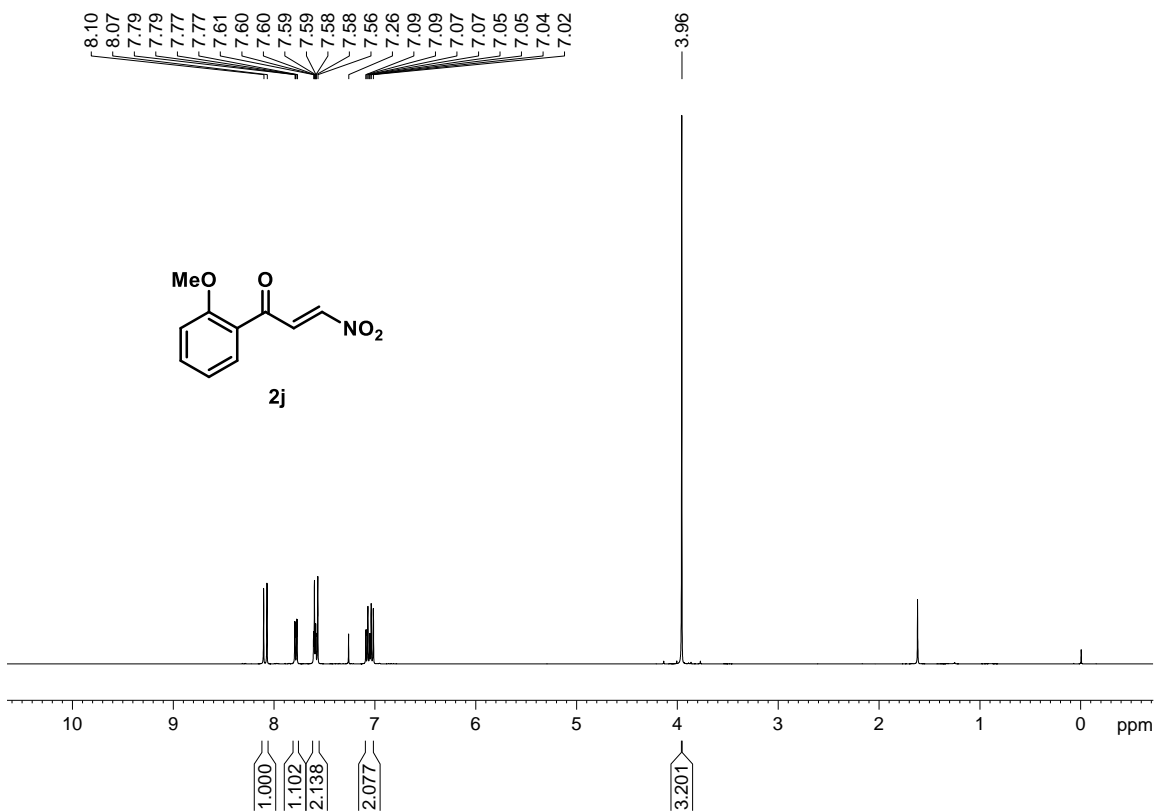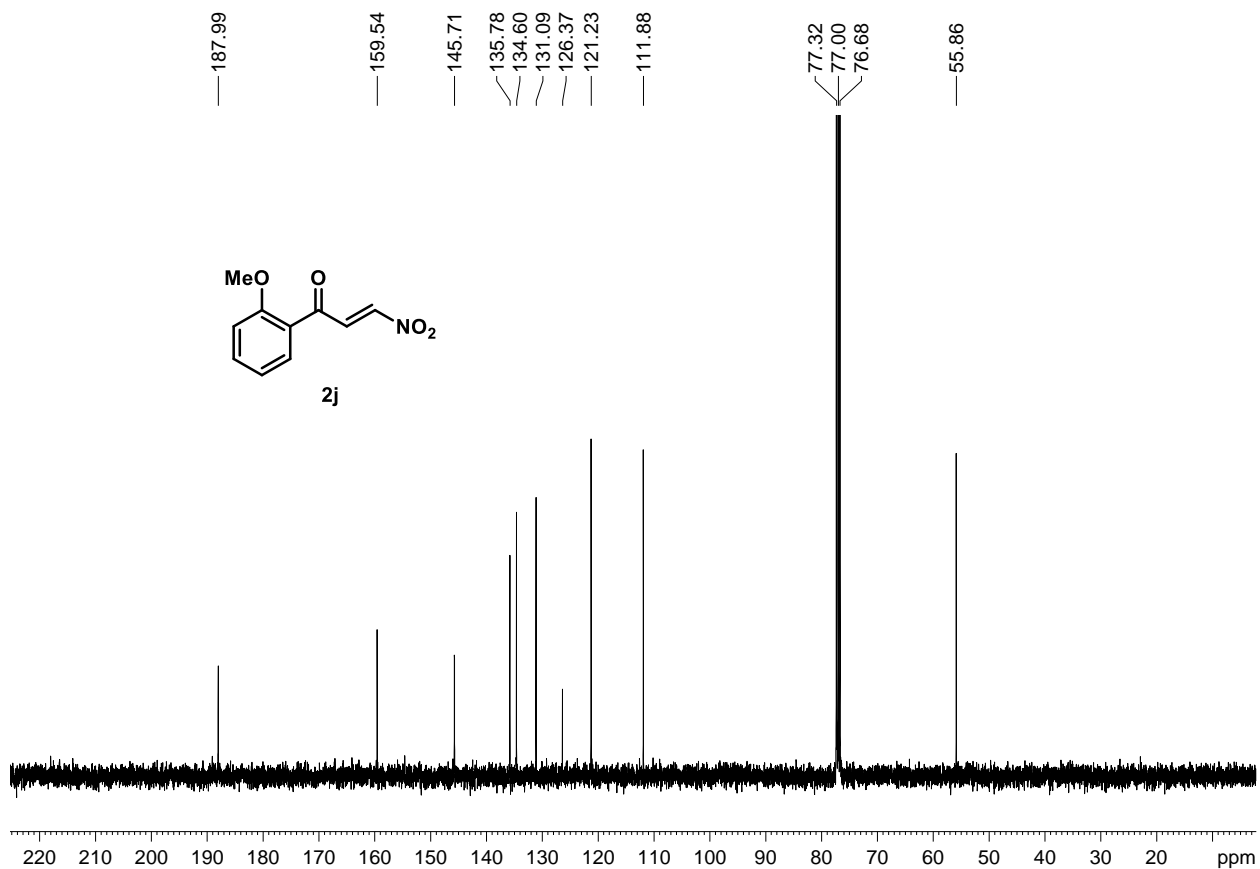



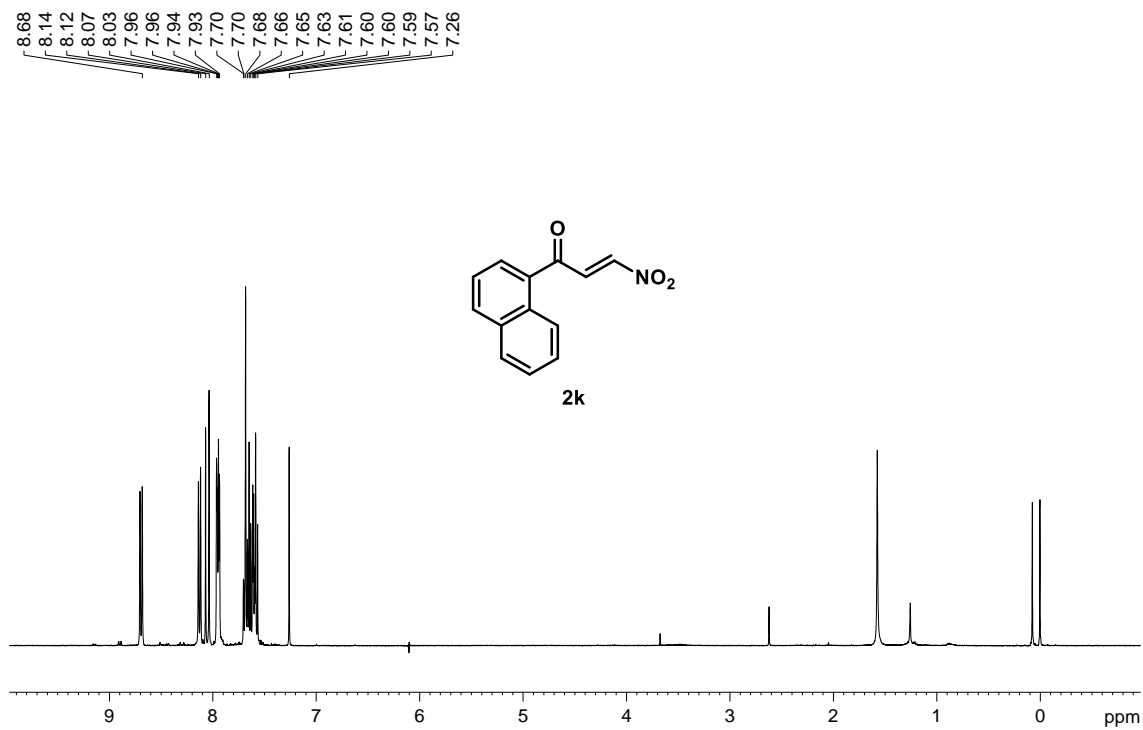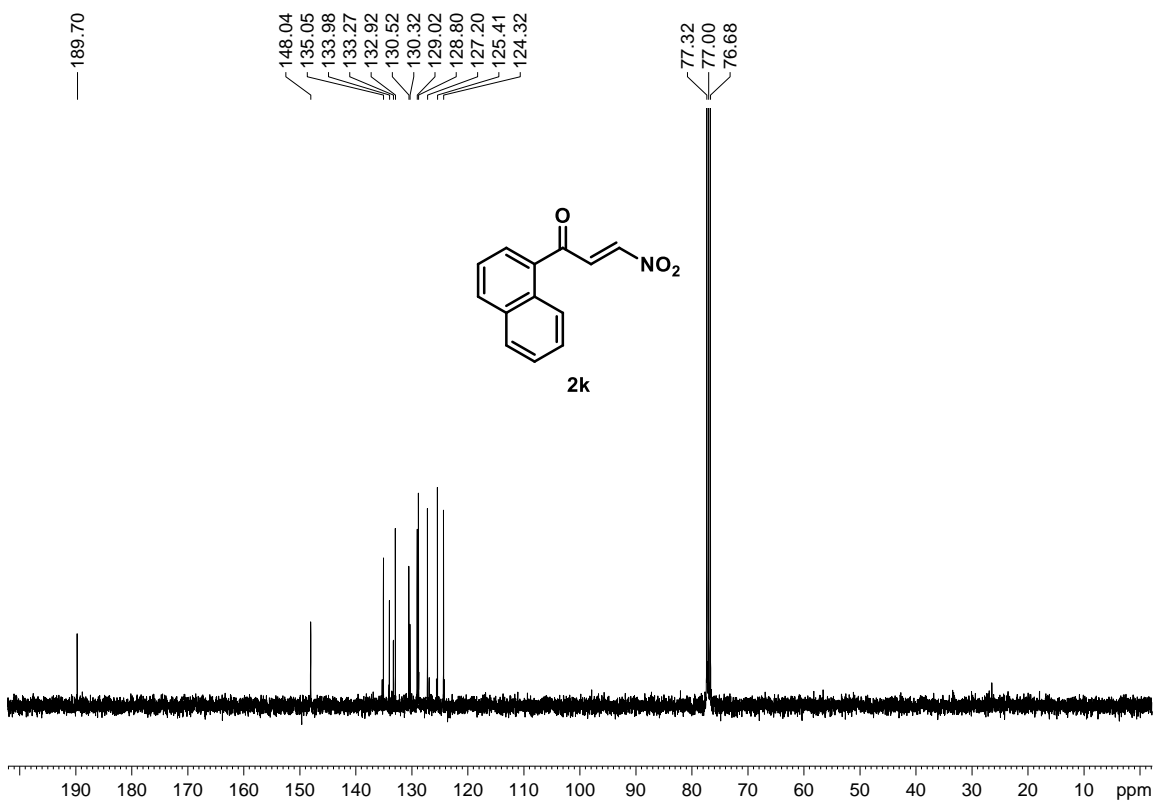

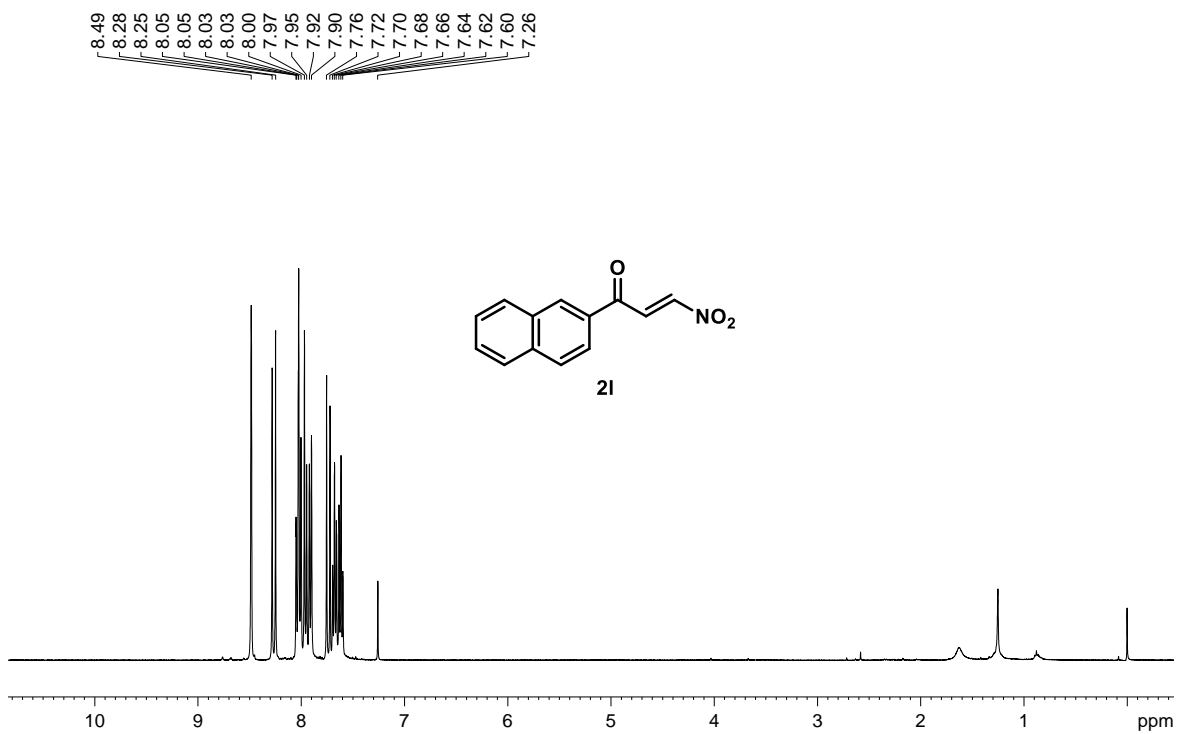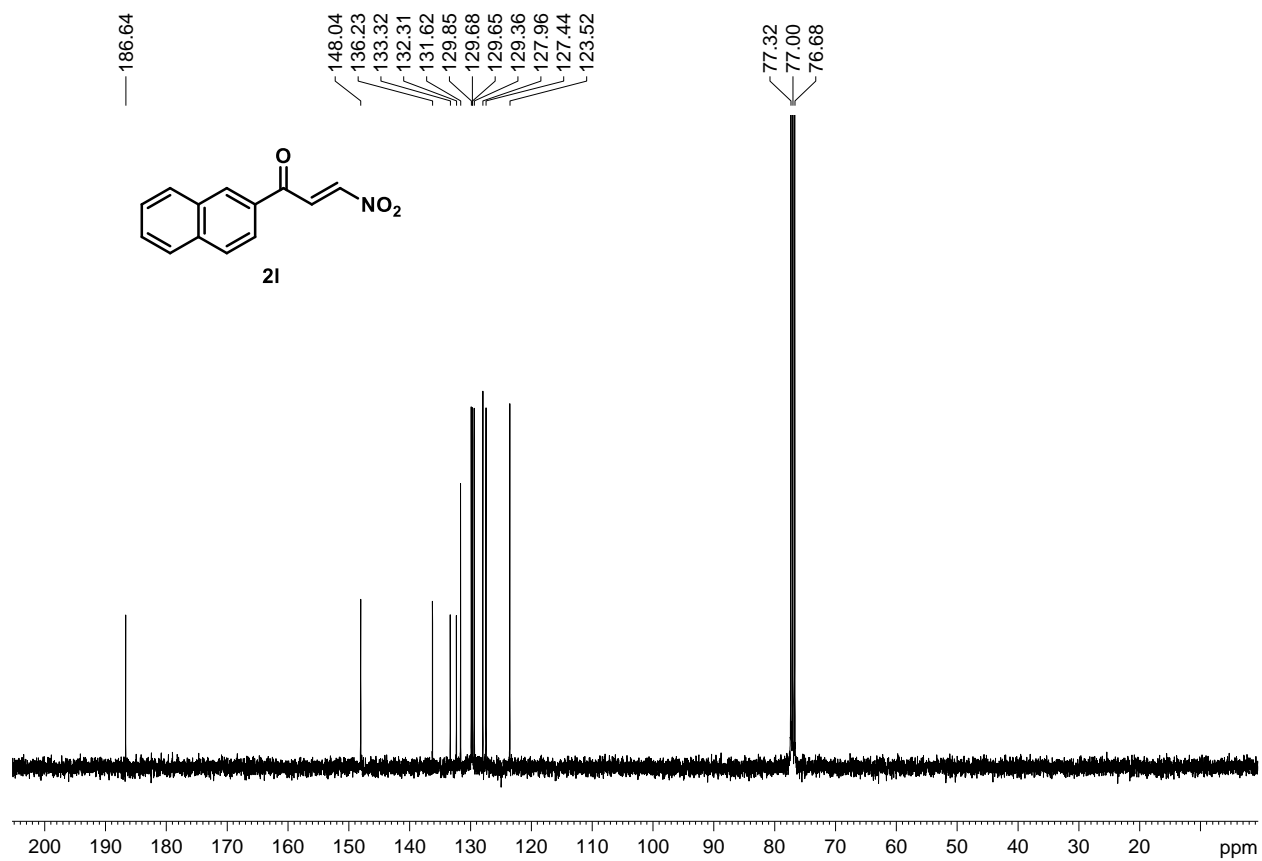

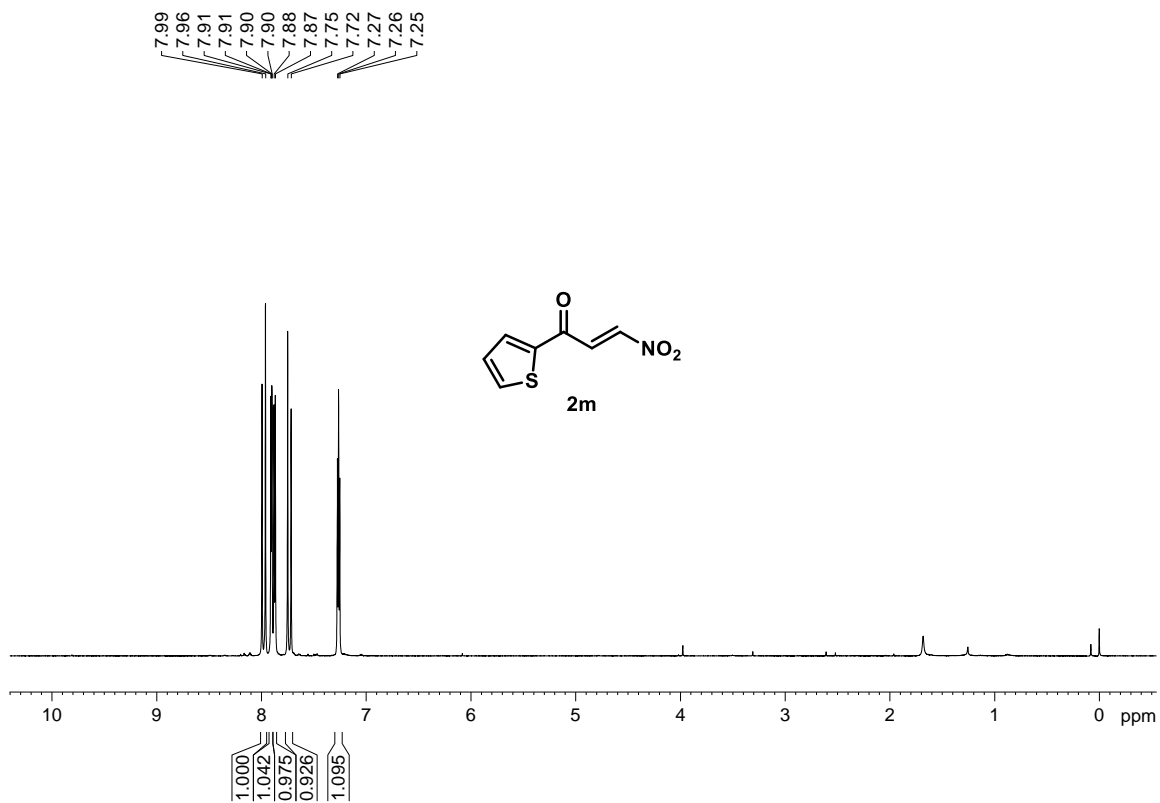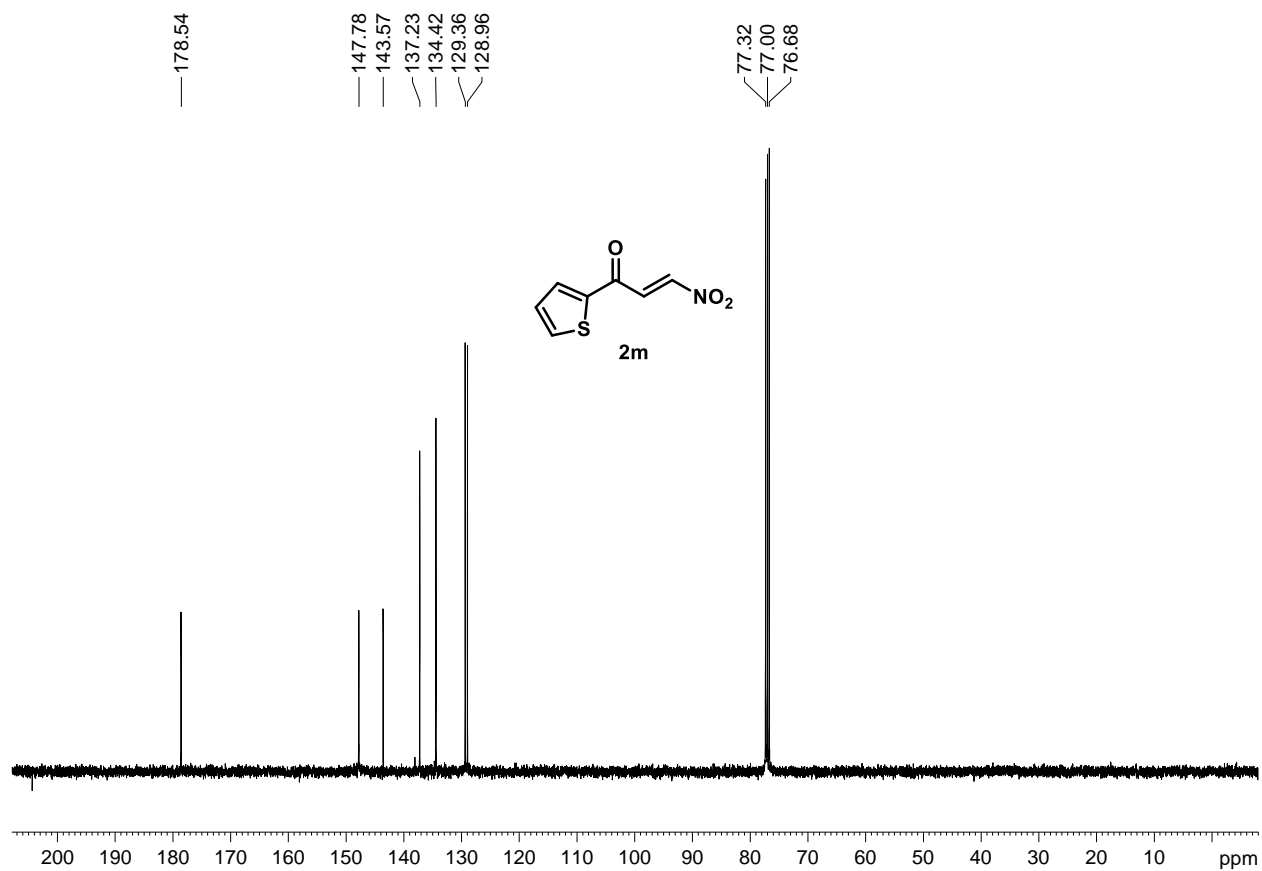

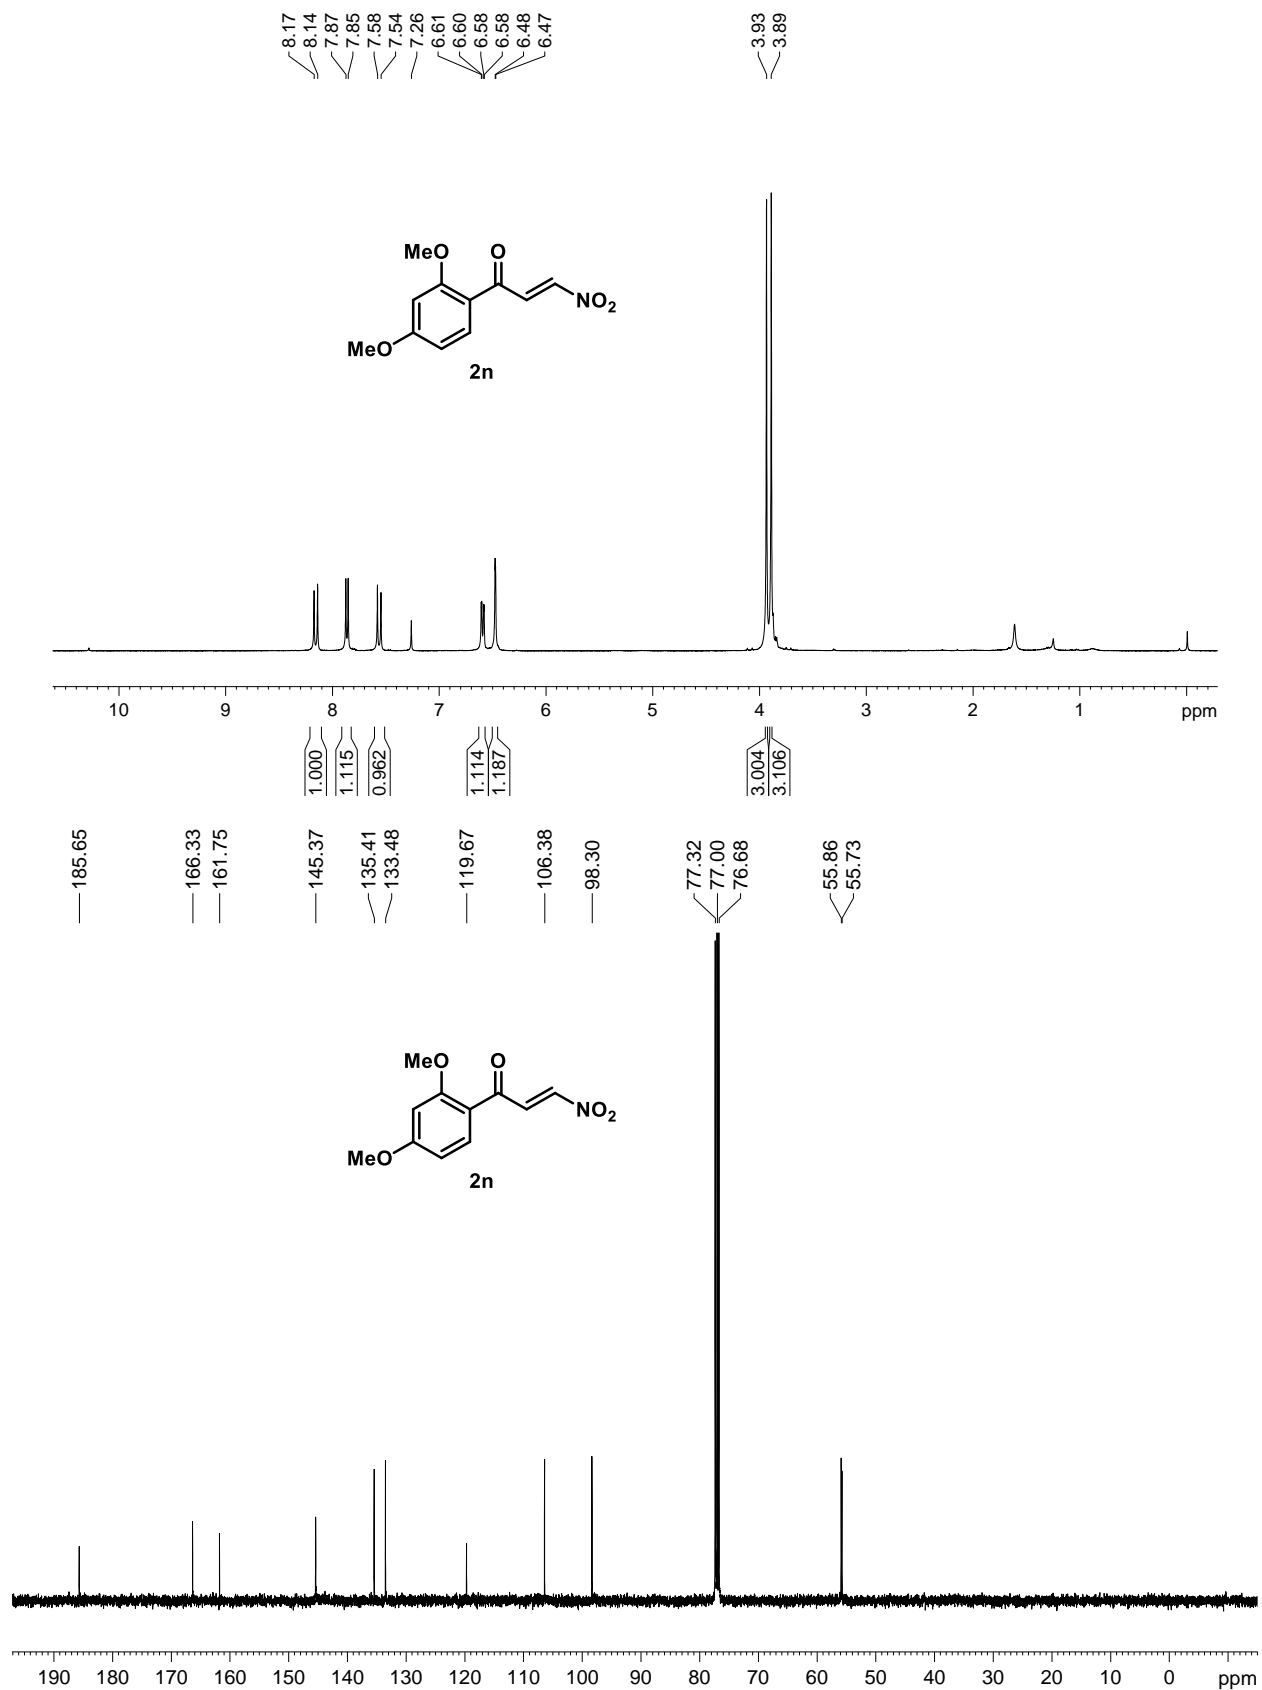

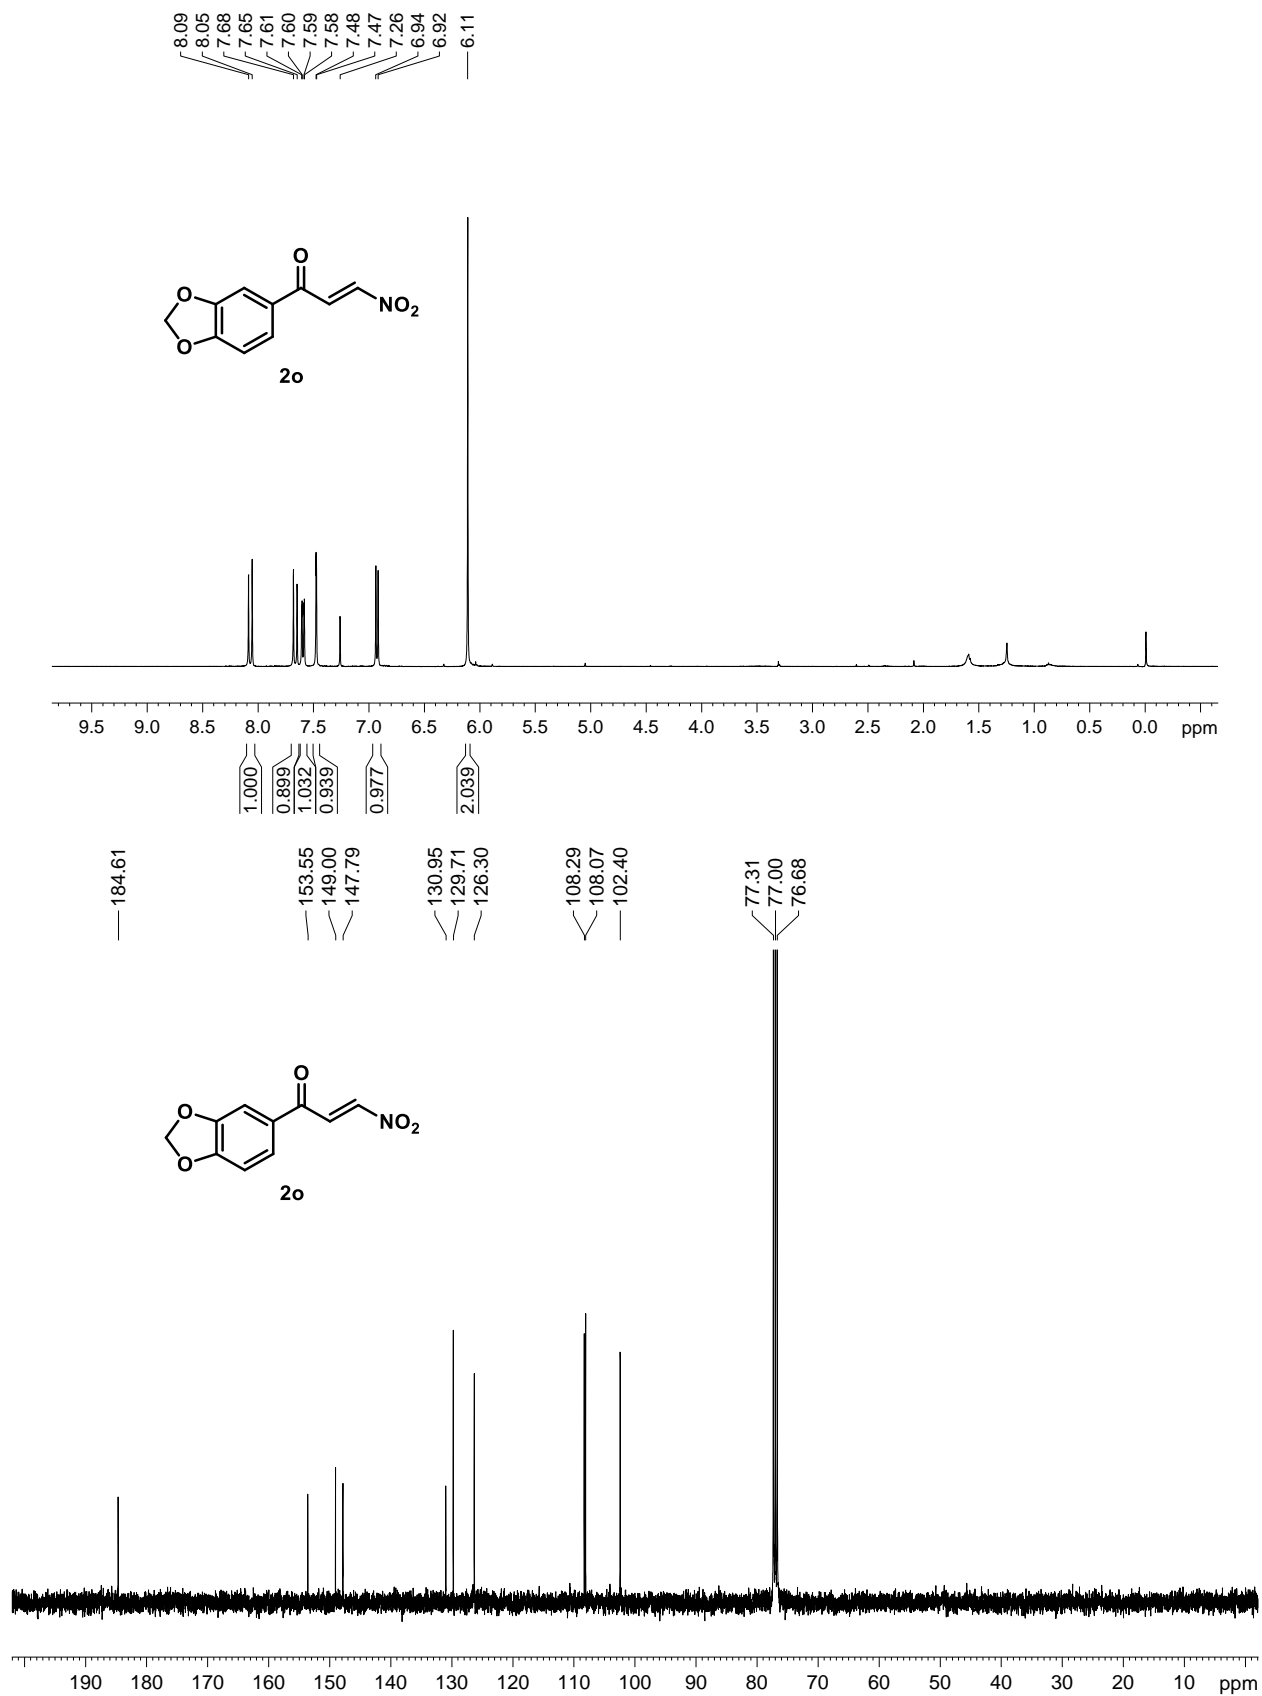

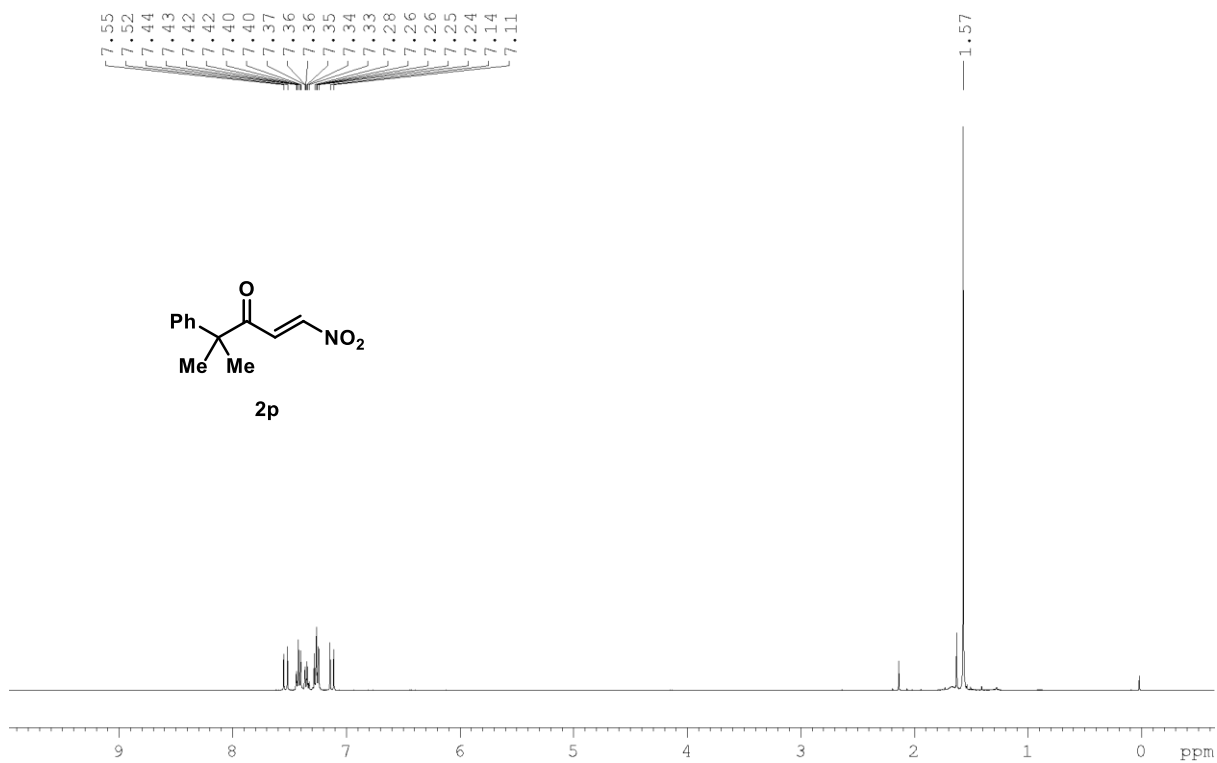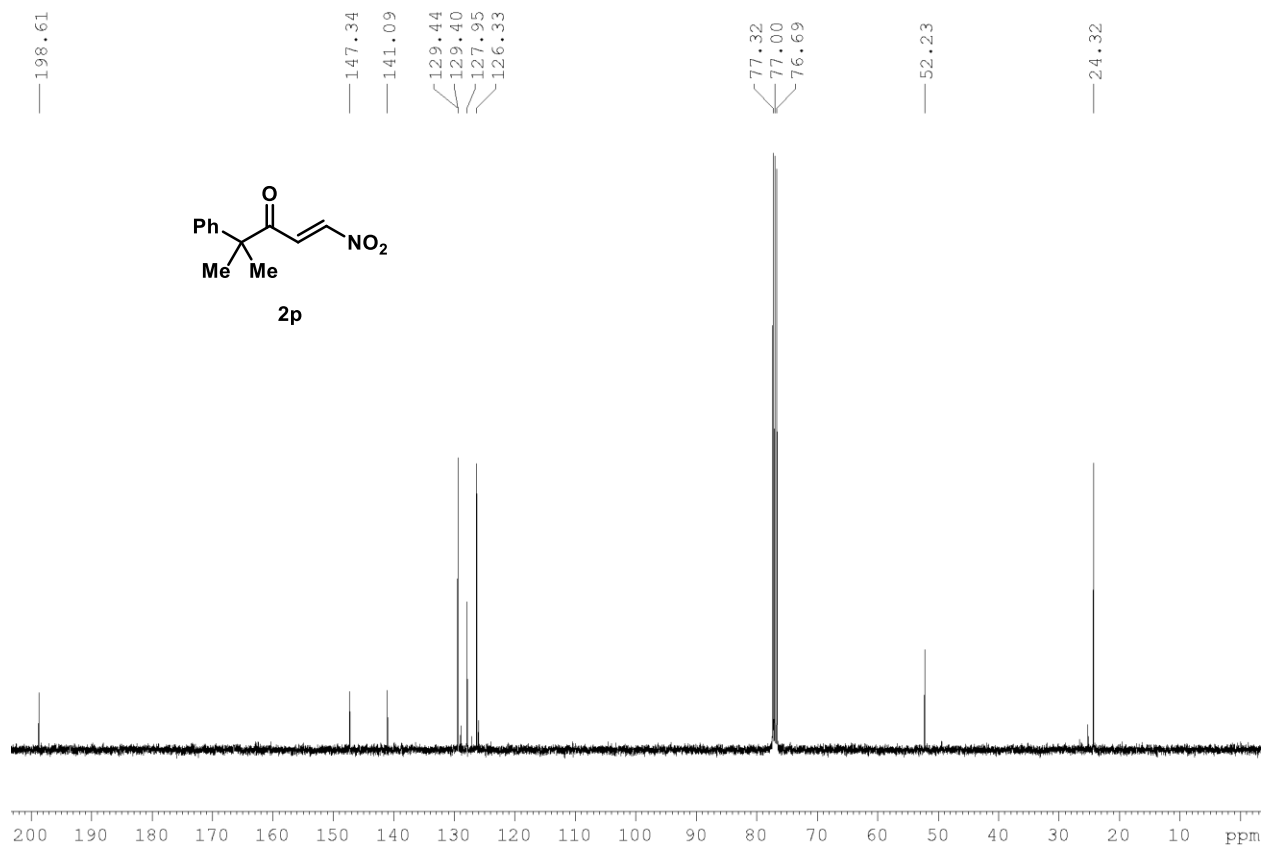

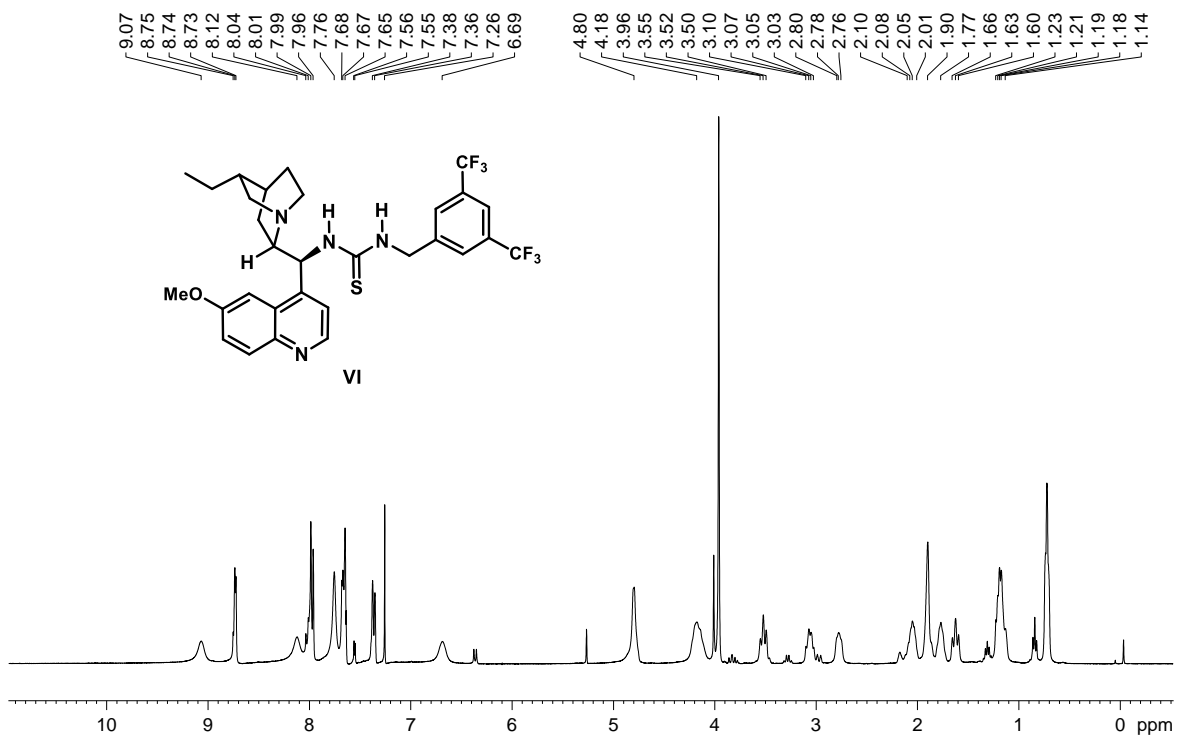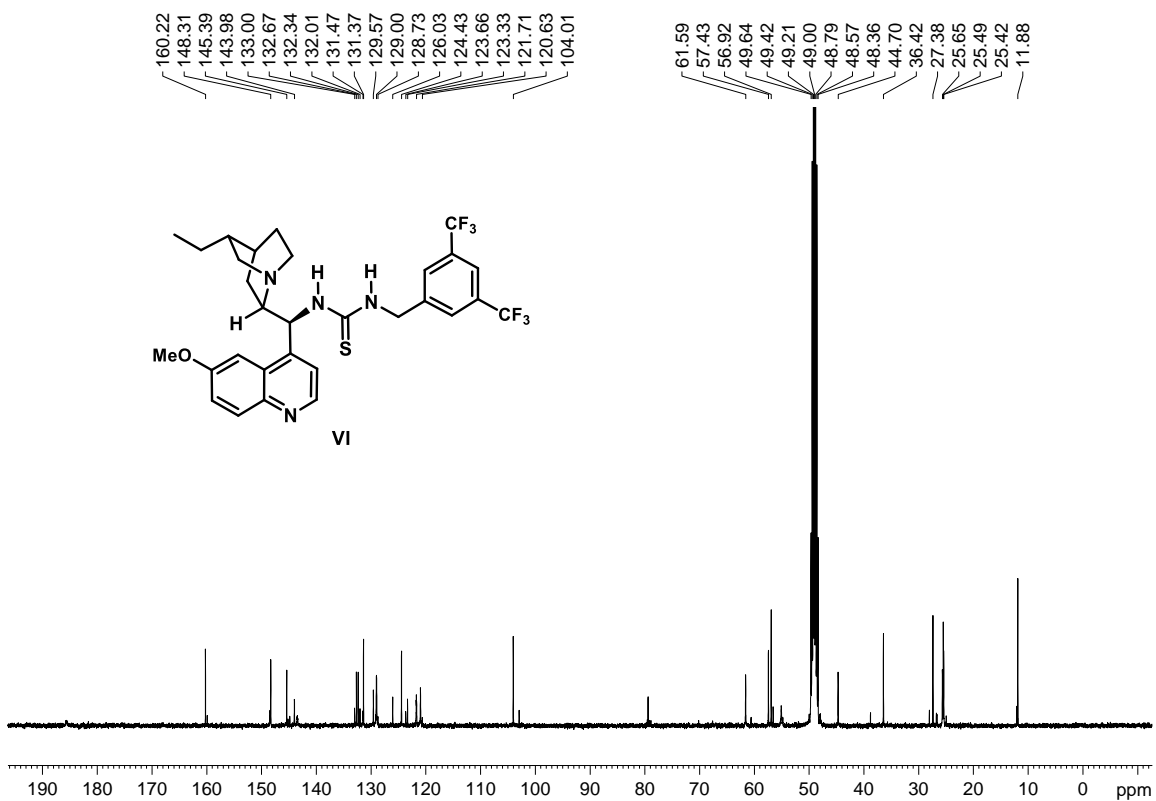

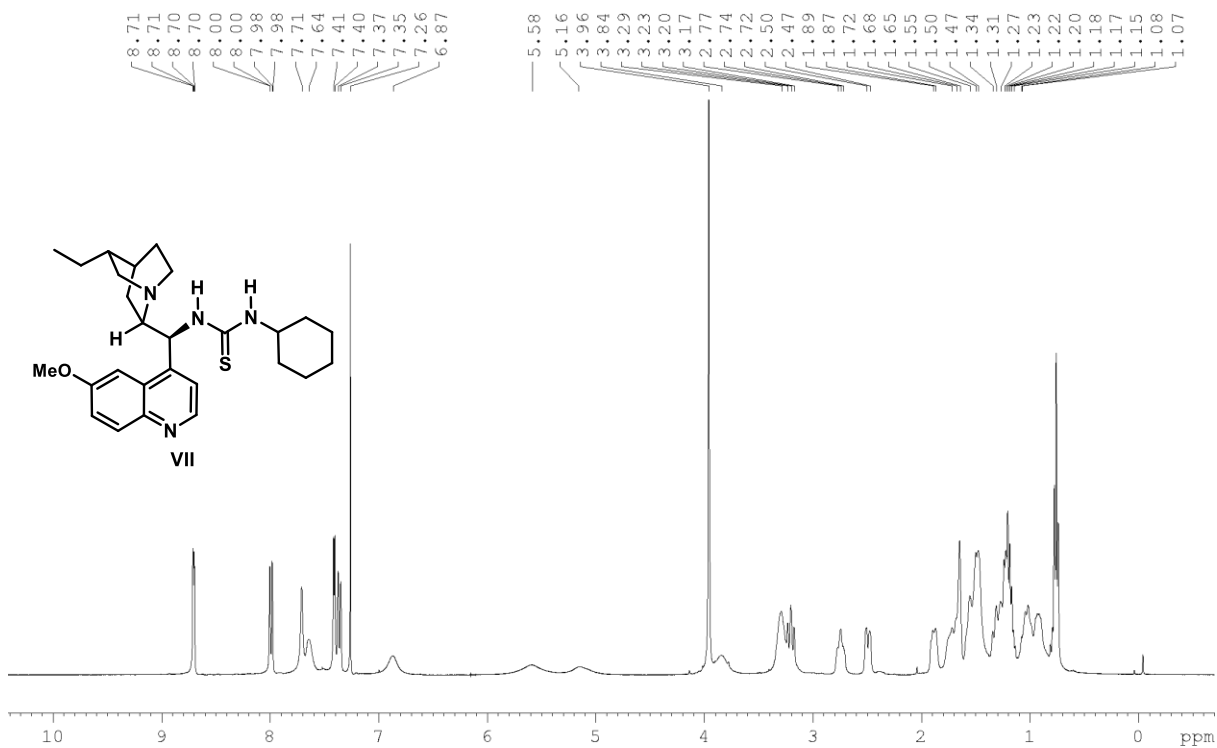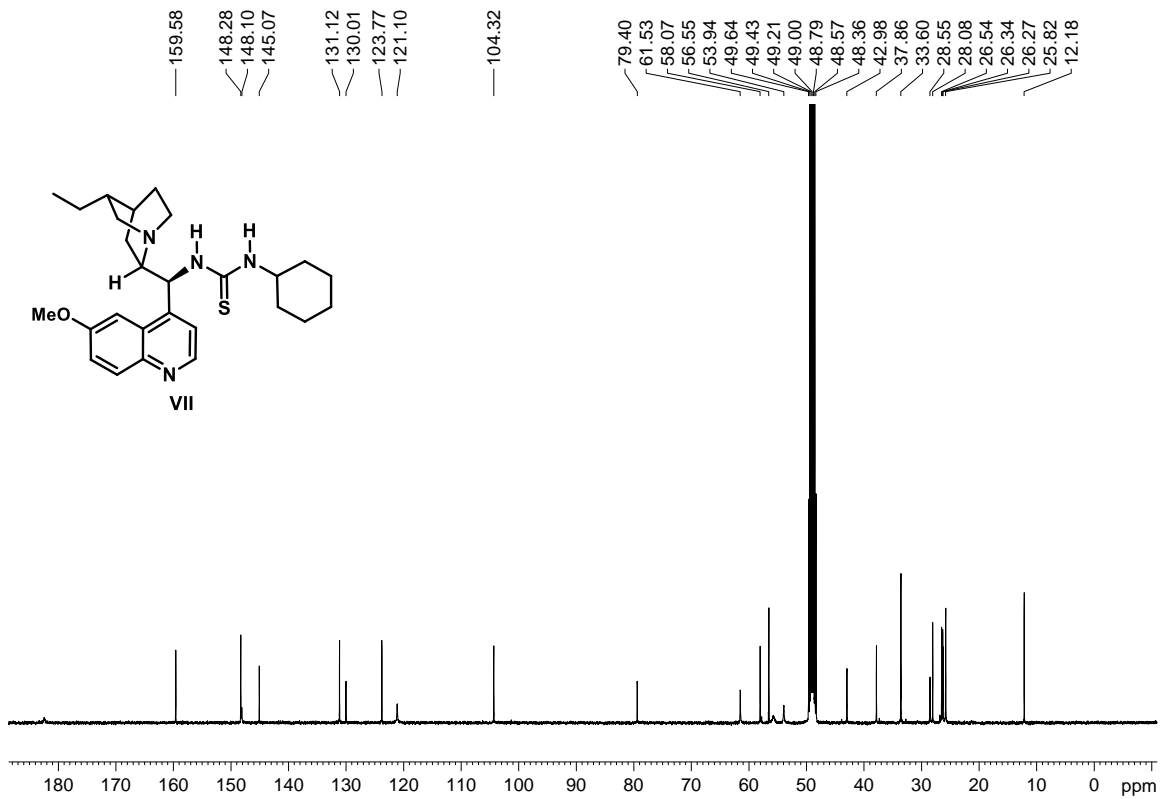



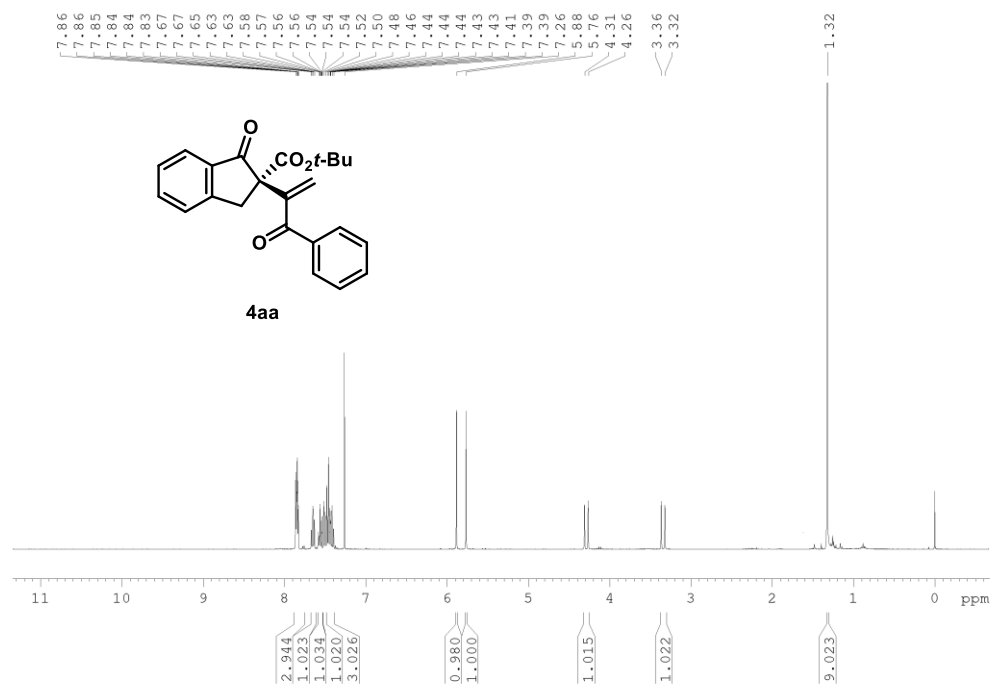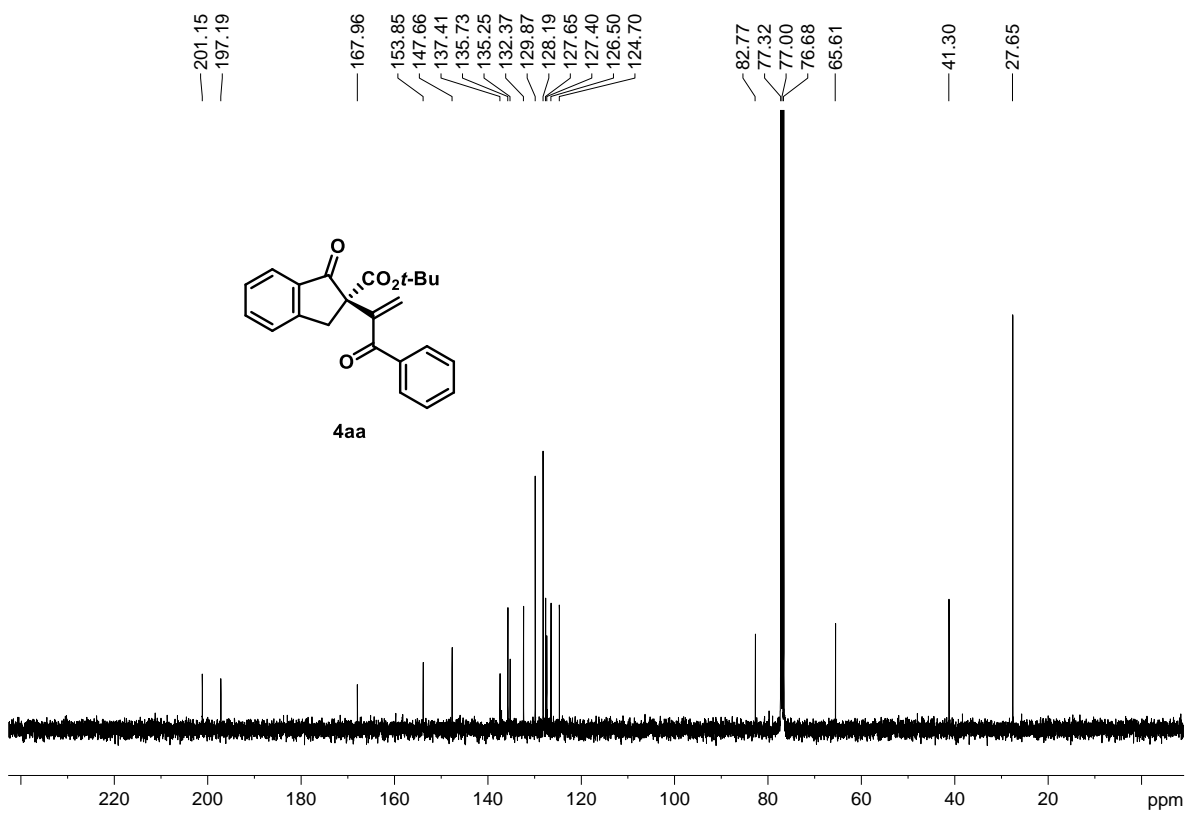

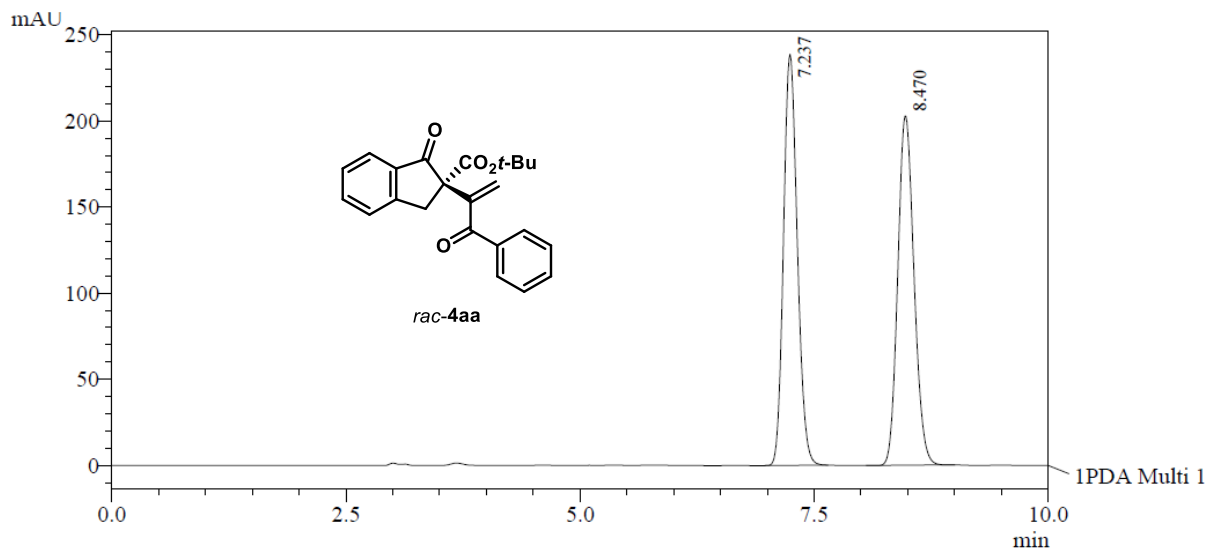

1 PDA Multi 1 / 254nm 4nm

PeakTable

PDA Ch1 254nm 4nm

| Peak# | Ret. Time | Area    | Area %  |
|-------|-----------|---------|---------|
| 1     | 7.237     | 2446403 | 50.004  |
| 2     | 8.470     | 2446025 | 49.996  |
| Total |           | 4892428 | 100.000 |

Daicel Chiralpak AD-H column (*n*-Hexane/IPA = 90:10, 1.0 mL min<sup>-1</sup>, 20 °C, 254 nm)

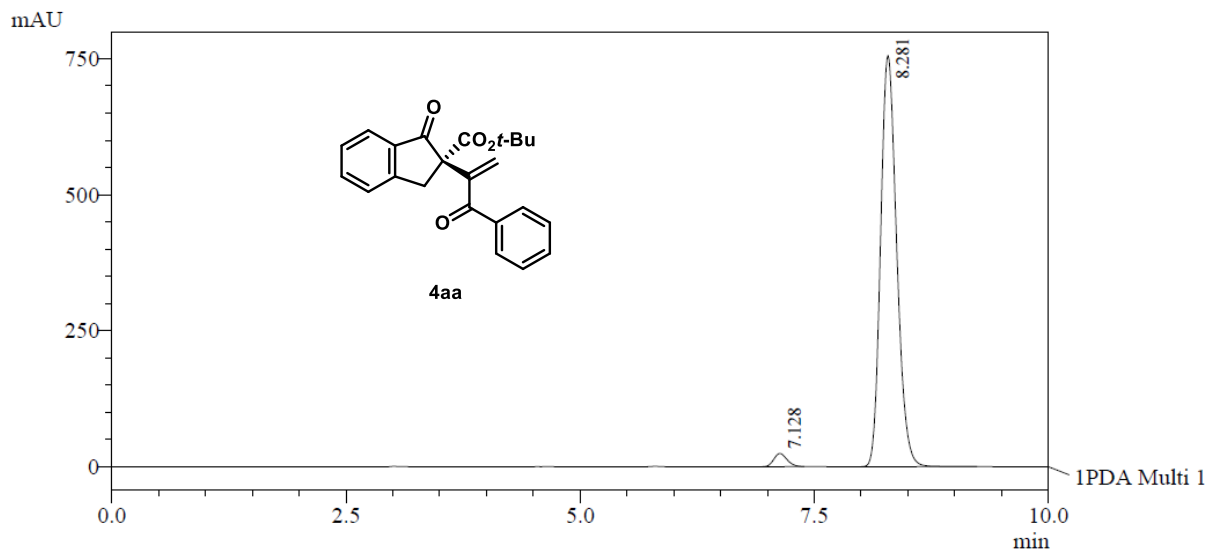

1 PDA Multi 1 / 254nm 4nm

PeakTable

PDA Ch1 254nm 4nm

| Peak# | Ret. Time | Area    | Area %  |
|-------|-----------|---------|---------|
| 1     | 7.128     | 236115  | 2.548   |
| 2     | 8.281     | 9030435 | 97.452  |
| Total |           | 9266550 | 100.000 |

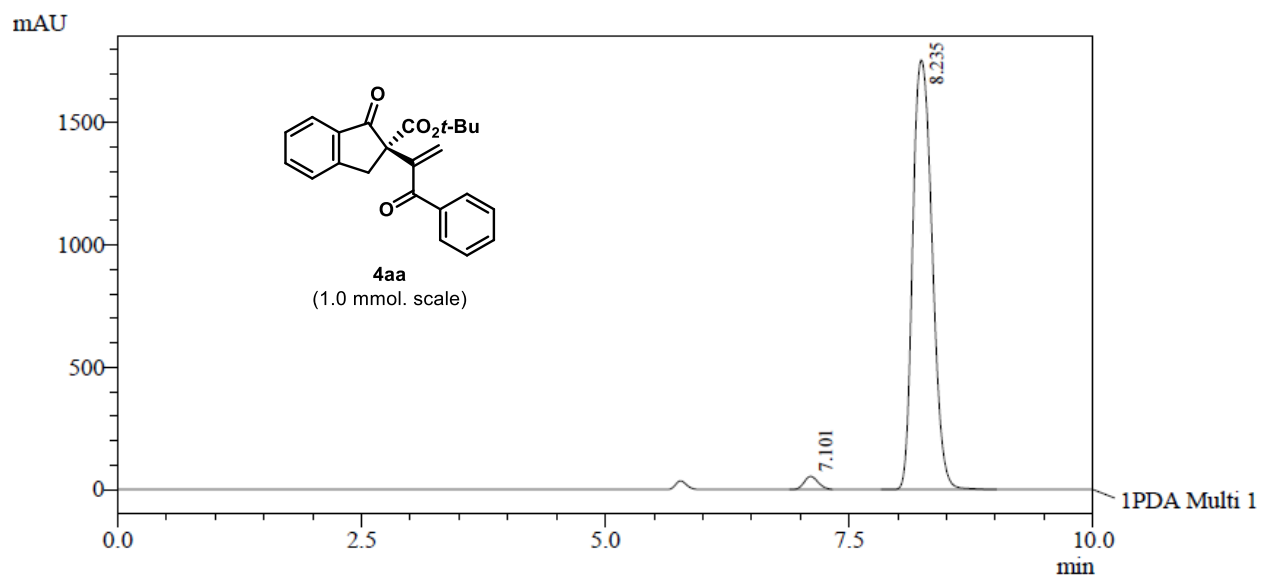

1 PDA Multi 1 / 254nm 4nm

PeakTable

PDA Ch1 254nm 4nm

| Peak# | Ret. Time | Area     | Area %  |
|-------|-----------|----------|---------|
| 1     | 7.101     | 529228   | 2.129   |
| 2     | 8.235     | 24324376 | 97.871  |
| Total |           | 24853603 | 100.000 |

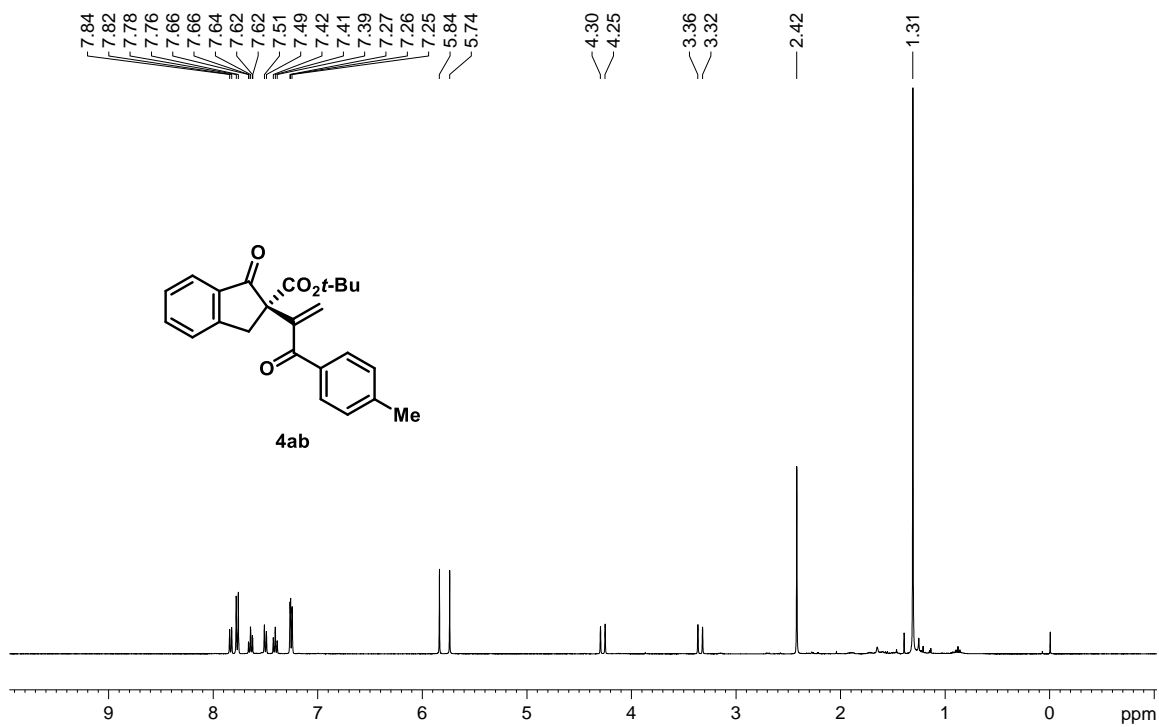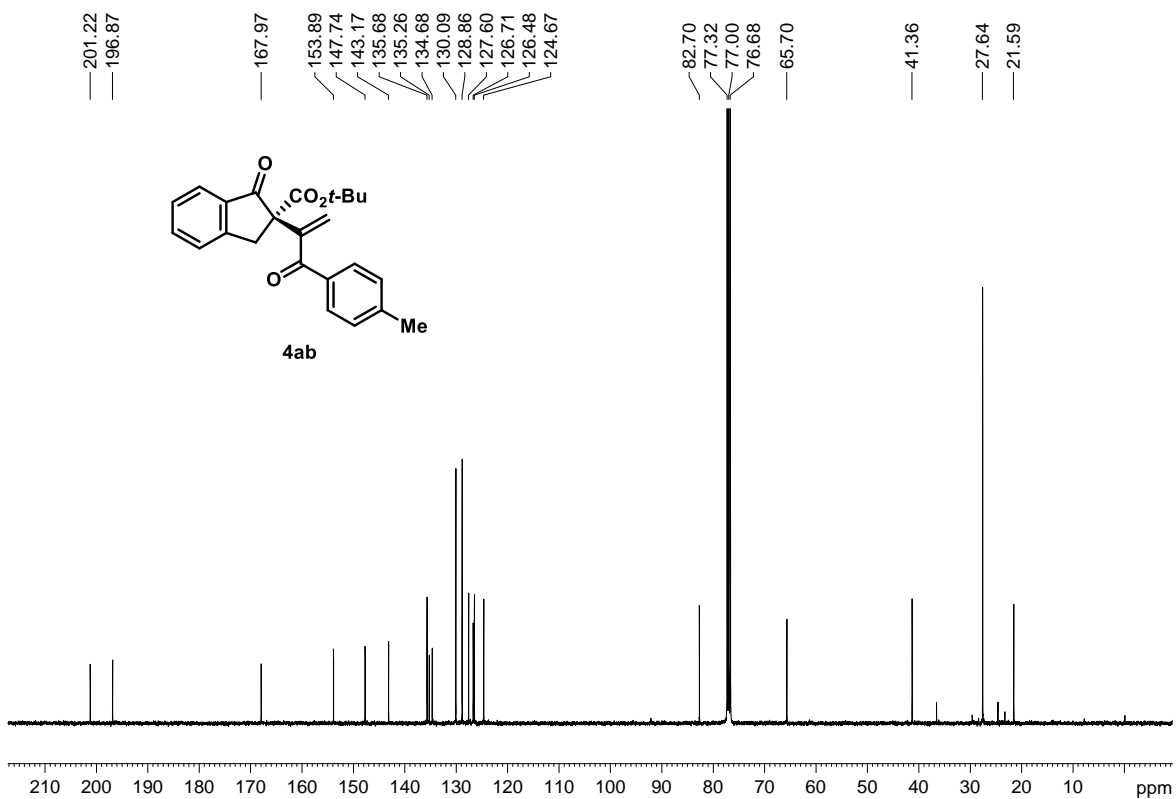

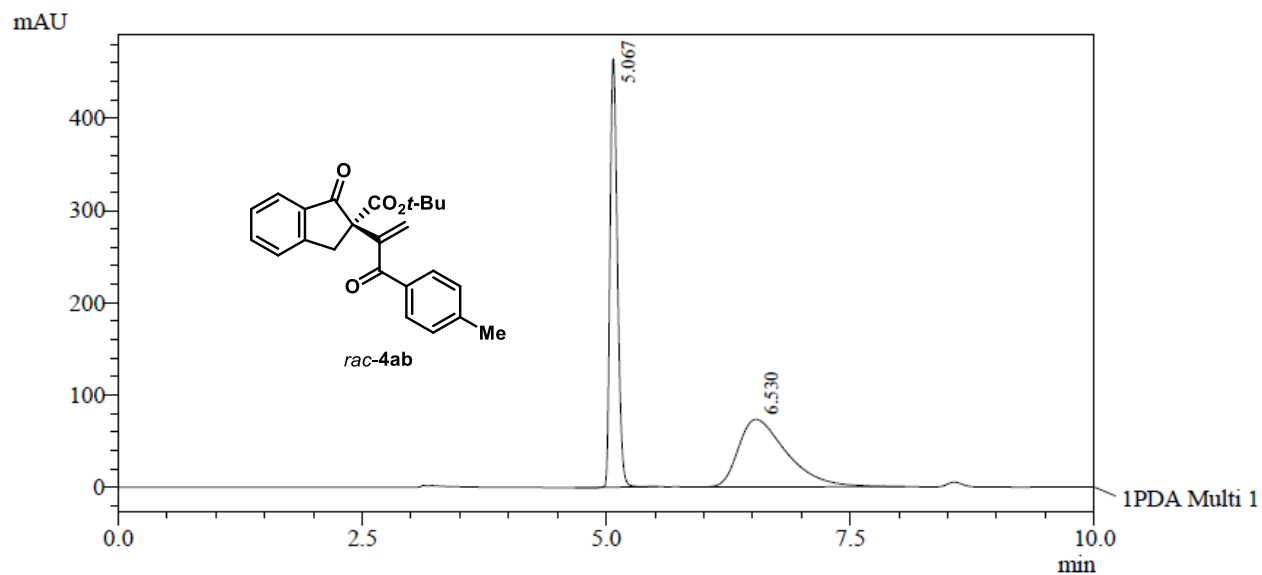

1 PDA Multi 1 / 254nm 4nm

PeakTable

PDA Ch1 254nm 4nm

| Peak# | Ret. Time | Area    | Area %  |
|-------|-----------|---------|---------|
| 1     | 5.067     | 2438054 | 49.246  |
| 2     | 6.530     | 2512738 | 50.754  |
| Total |           | 4950792 | 100.000 |

Daicel Chiralpak AS-H column (*n*-Hexane/EtOH = 95:5, 1.0 mL min<sup>-1</sup>, 20 °C, 254 nm)

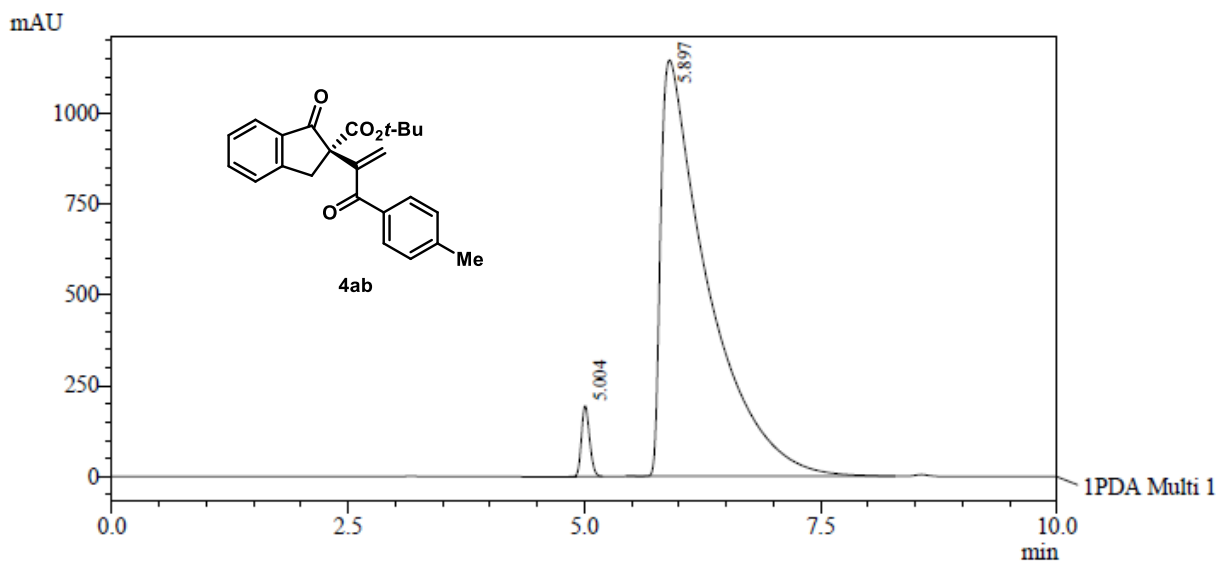

1 PDA Multi 1 / 254nm 4nm

PeakTable

PDA Ch1 254nm 4nm

| Peak# | Ret. Time | Area     | Area %  |
|-------|-----------|----------|---------|
| 1     | 5.004     | 1167436  | 2.876   |
| 2     | 5.897     | 39421534 | 97.124  |
| Total |           | 40588970 | 100.000 |

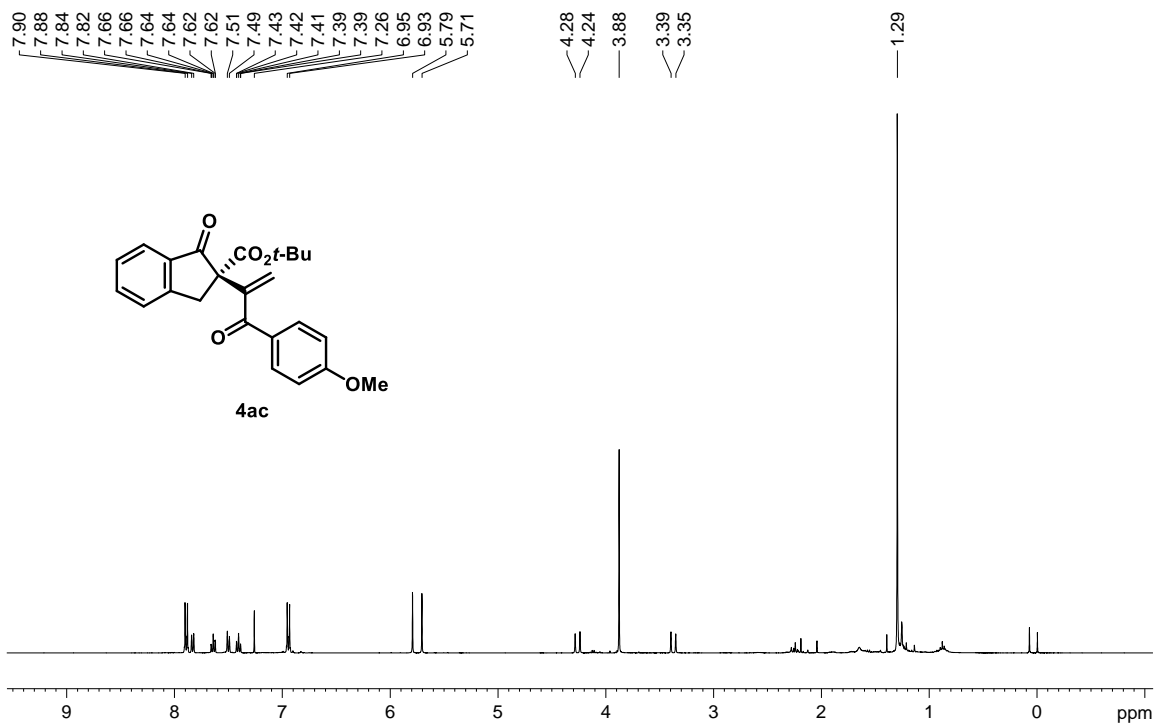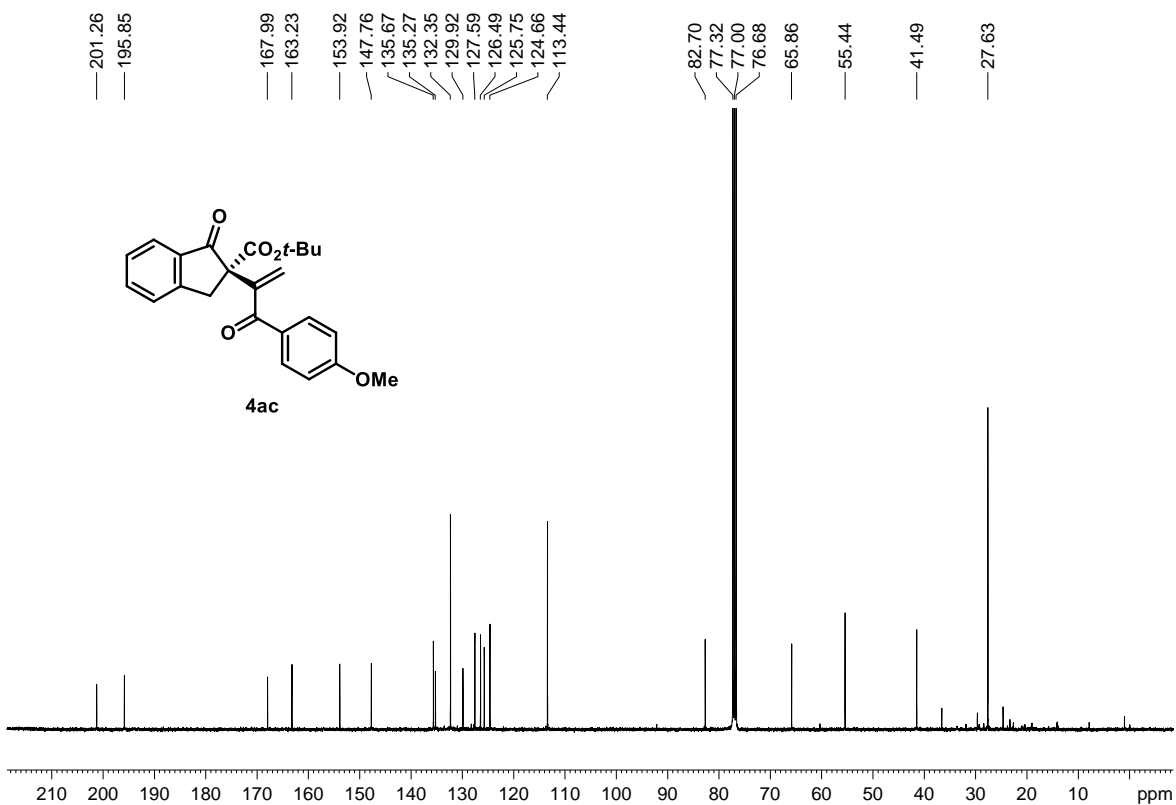

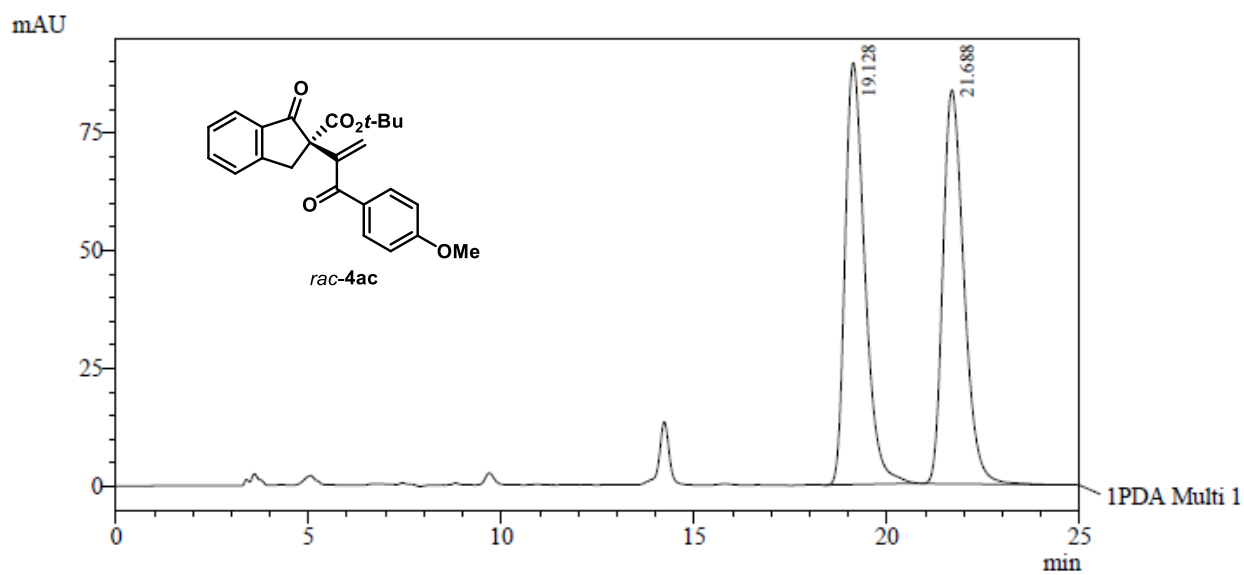

1 PDA Multi 1 / 254nm 4nm

PeakTable

PDA Ch1 254nm 4nm

| Peak# | Ret. Time | Area    | Area %  |
|-------|-----------|---------|---------|
| 1     | 19.128    | 3182036 | 50.150  |
| 2     | 21.688    | 3162949 | 49.850  |
| Total |           | 6344985 | 100.000 |

Daicel Chiralpak ID column (*n*-Hexane/IPA = 90:10, 1.0 mL min<sup>-1</sup>, 20 °C, 254 nm)

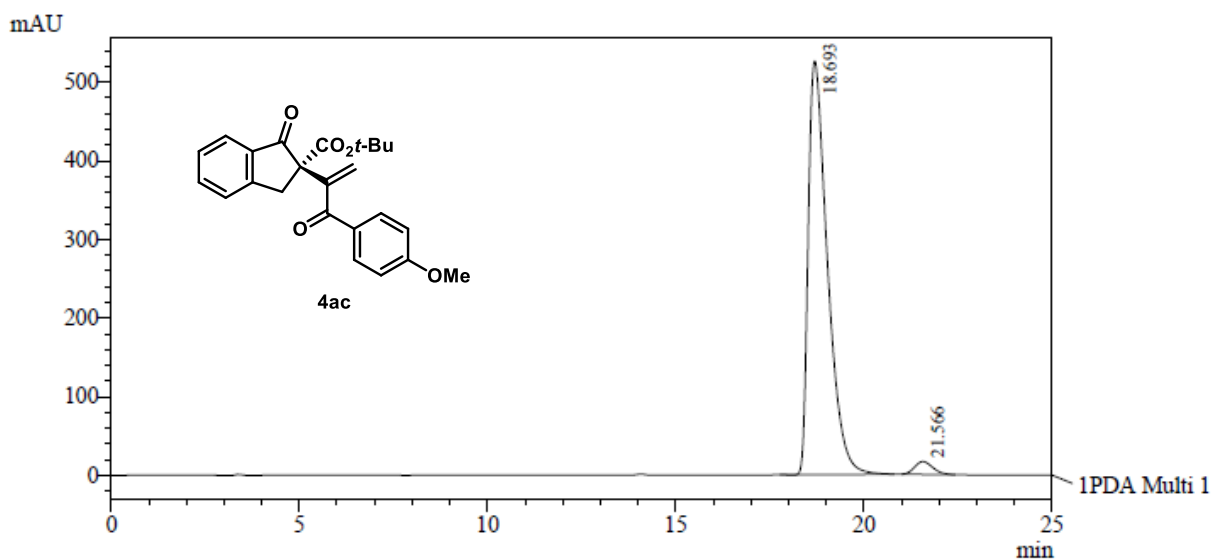

1 PDA Multi 1 / 254nm 4nm

PeakTable

PDA Ch1 254nm 4nm

| Peak# | Ret. Time | Area     | Area %  |
|-------|-----------|----------|---------|
| 1     | 18.693    | 18662970 | 97.160  |
| 2     | 21.566    | 545576   | 2.840   |
| Total |           | 19208546 | 100.000 |

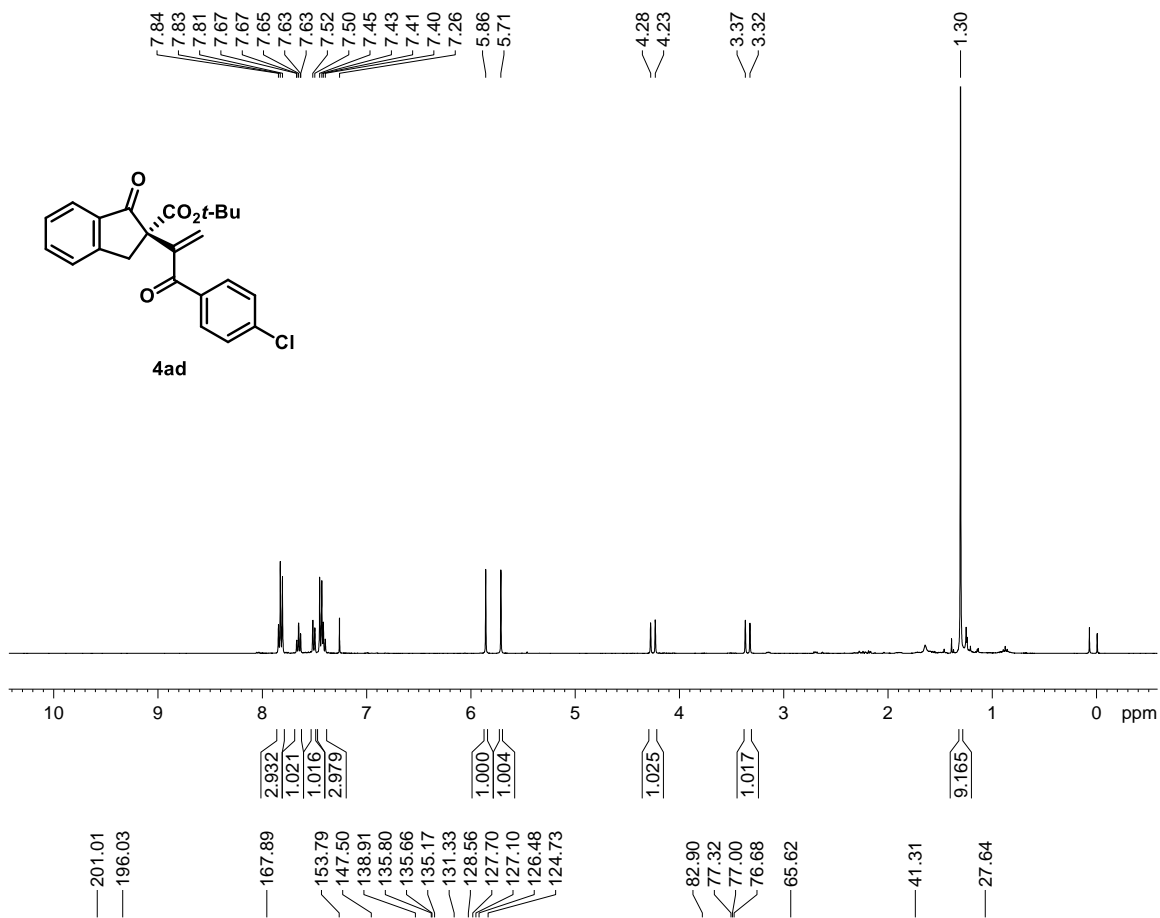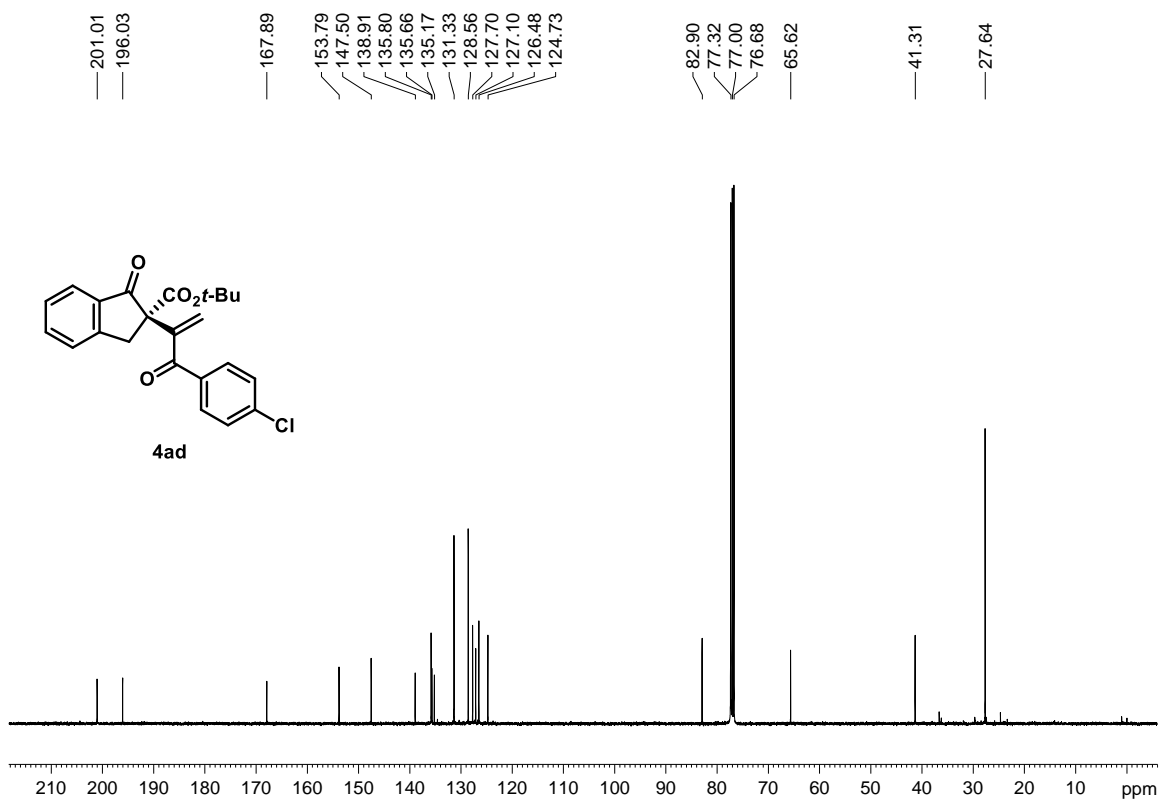



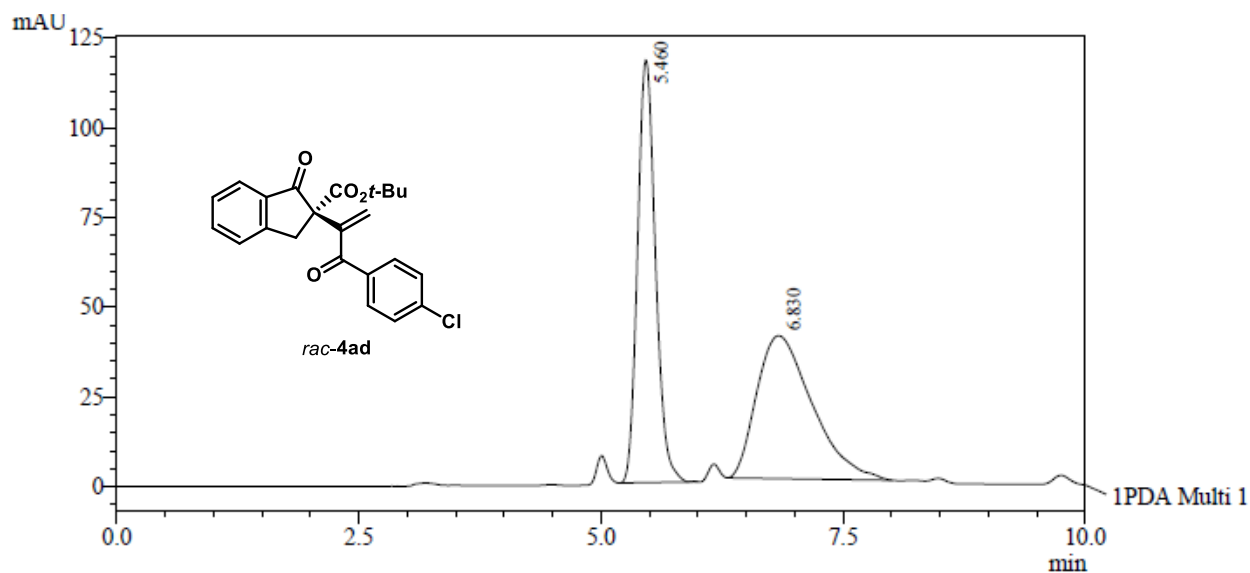

1 PDA Multi 1 / 254nm 4nm

PeakTable

PDA Ch1 254nm 4nm

| Peak# | Ret. Time | Area    | Area %  |
|-------|-----------|---------|---------|
| 1     | 5.460     | 1521336 | 48.871  |
| 2     | 6.830     | 1591617 | 51.129  |
| Total |           | 3112953 | 100.000 |

Daicel Chiralpak AS-H column (*n*-Hexane/IPA = 90:10, 1.0 mL min<sup>-1</sup>, 20 °C, 254 nm)

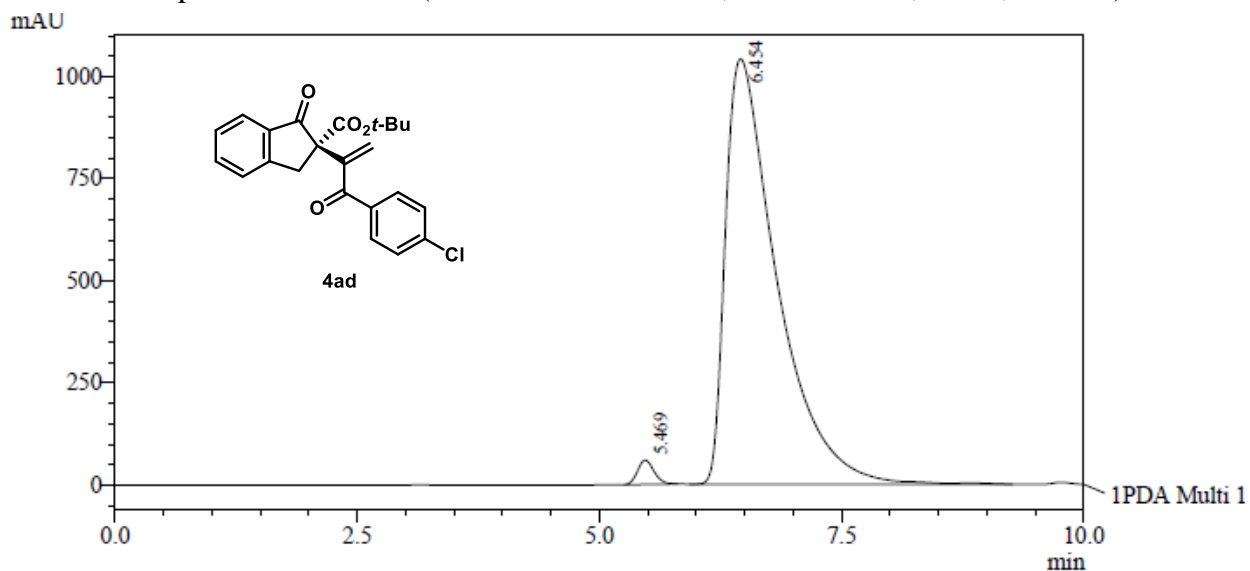

1 PDA Multi 1 / 254nm 4nm

PeakTable

PDA Ch1 254nm 4nm

| Peak# | Ret. Time | Area     | Area %  |
|-------|-----------|----------|---------|
| 1     | 5.469     | 702583   | 1.791   |
| 2     | 6.454     | 38526749 | 98.209  |
| Total |           | 39229332 | 100.000 |

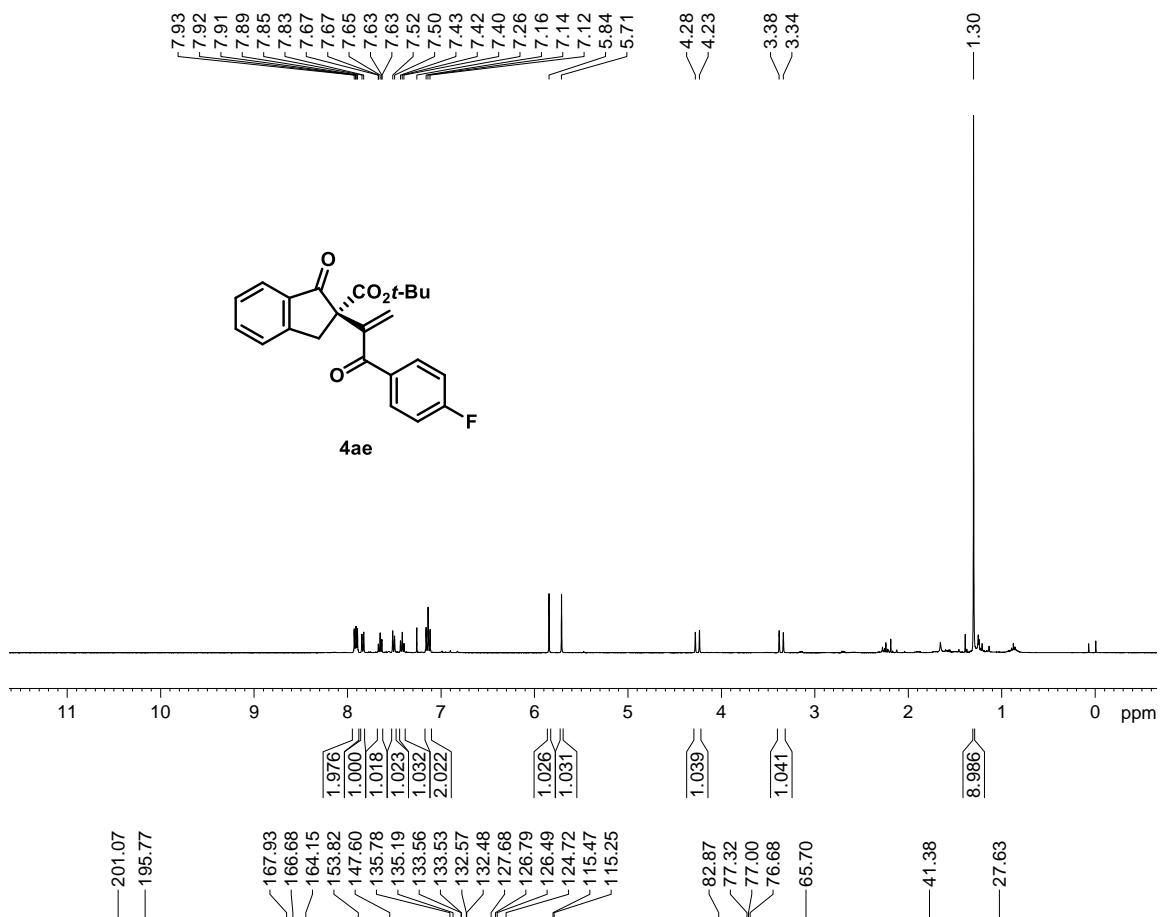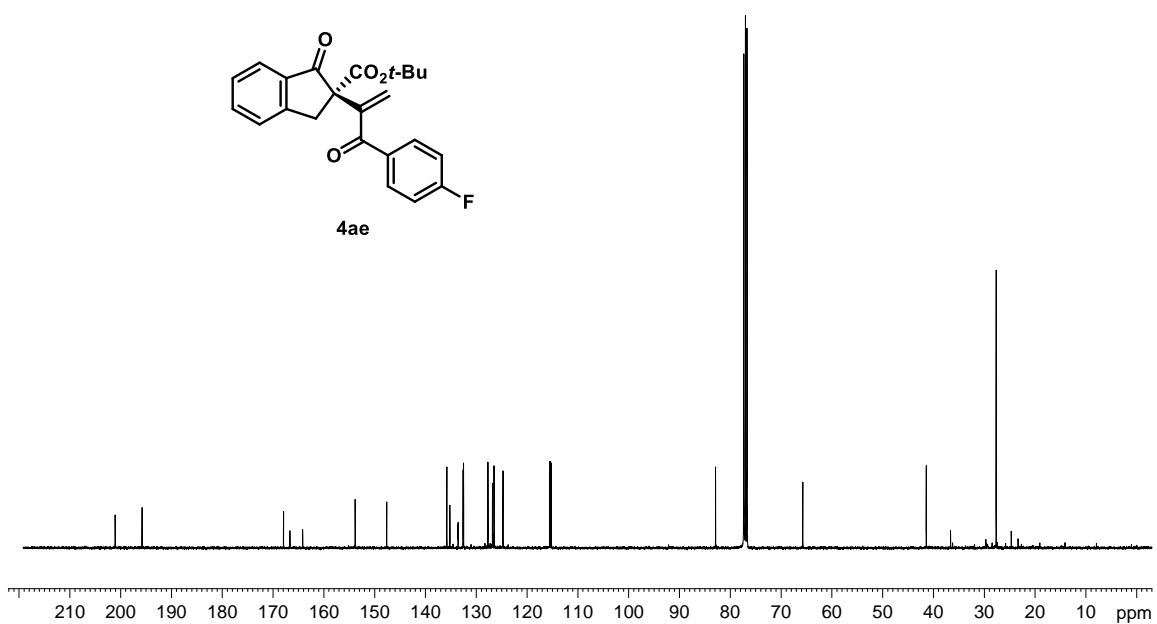

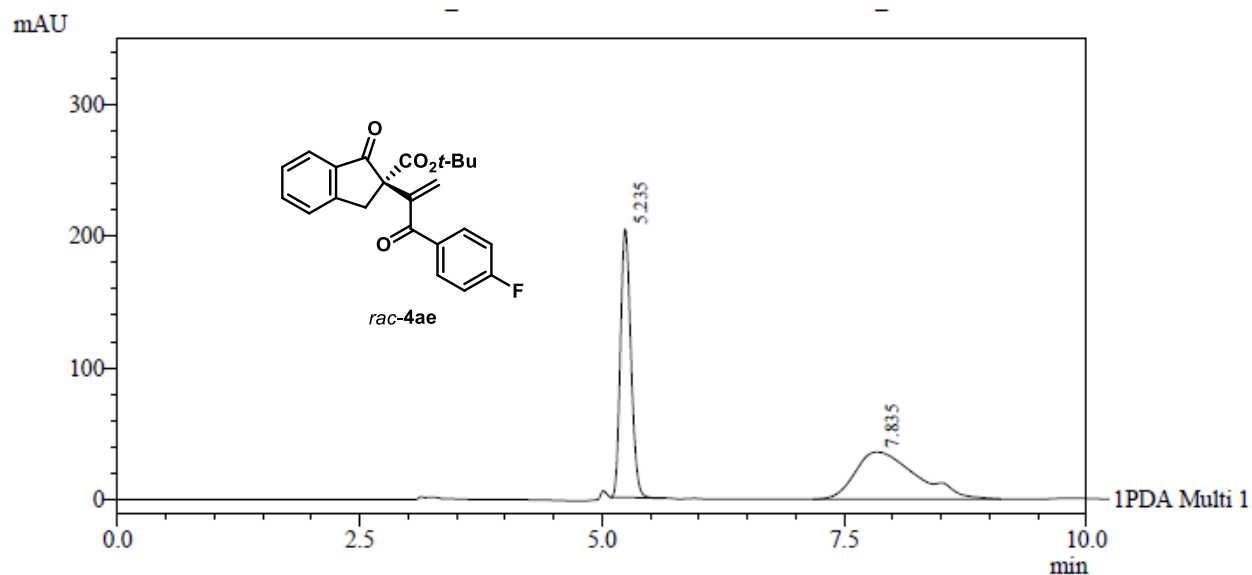

1 PDA Multi 1 / 254nm 4nm

PeakTable

PDA Ch1 254nm 4nm

| Peak# | Ret. Time | Area    | Area %  |
|-------|-----------|---------|---------|
| 1     | 5.235     | 1524429 | 49.068  |
| 2     | 7.835     | 1582339 | 50.932  |
| Total |           | 3106769 | 100.000 |

Daicel Chiralpak AS-H column (*n*-Hexane/EtOH = 95:5, 1.0 mL min<sup>-1</sup>, 20 °C, 254 nm)

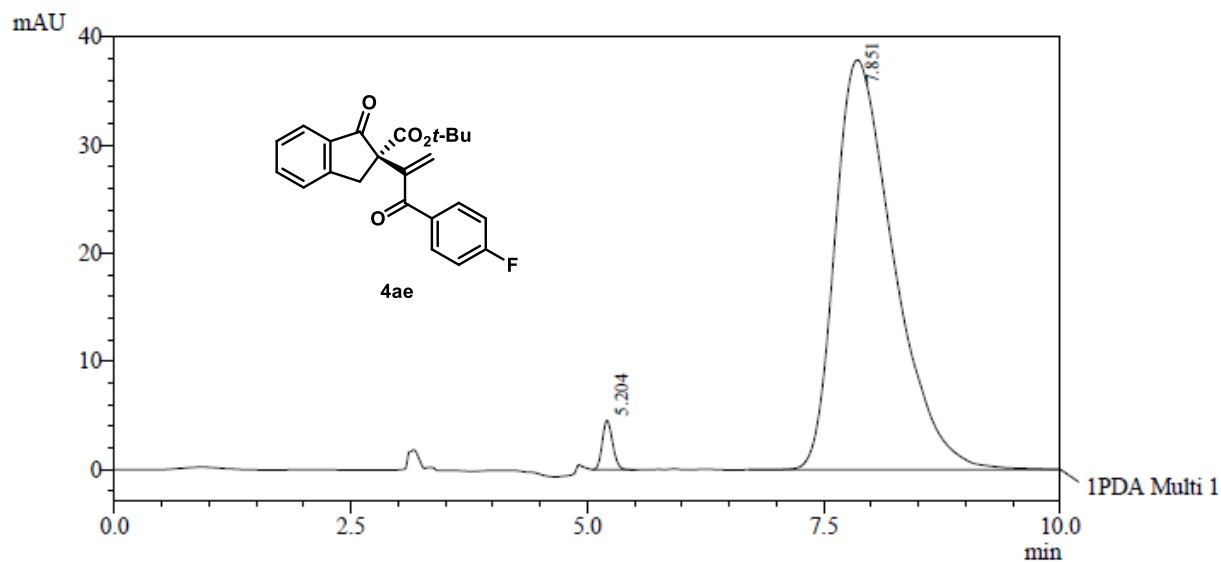

1 PDA Multi 1 / 254nm 4nm

PeakTable

PDA Ch1 254nm 4nm

| Peak# | Ret. Time | Area    | Area %  |
|-------|-----------|---------|---------|
| 1     | 5.204     | 34509   | 2.068   |
| 2     | 7.851     | 1634251 | 97.932  |
| Total |           | 1668761 | 100.000 |

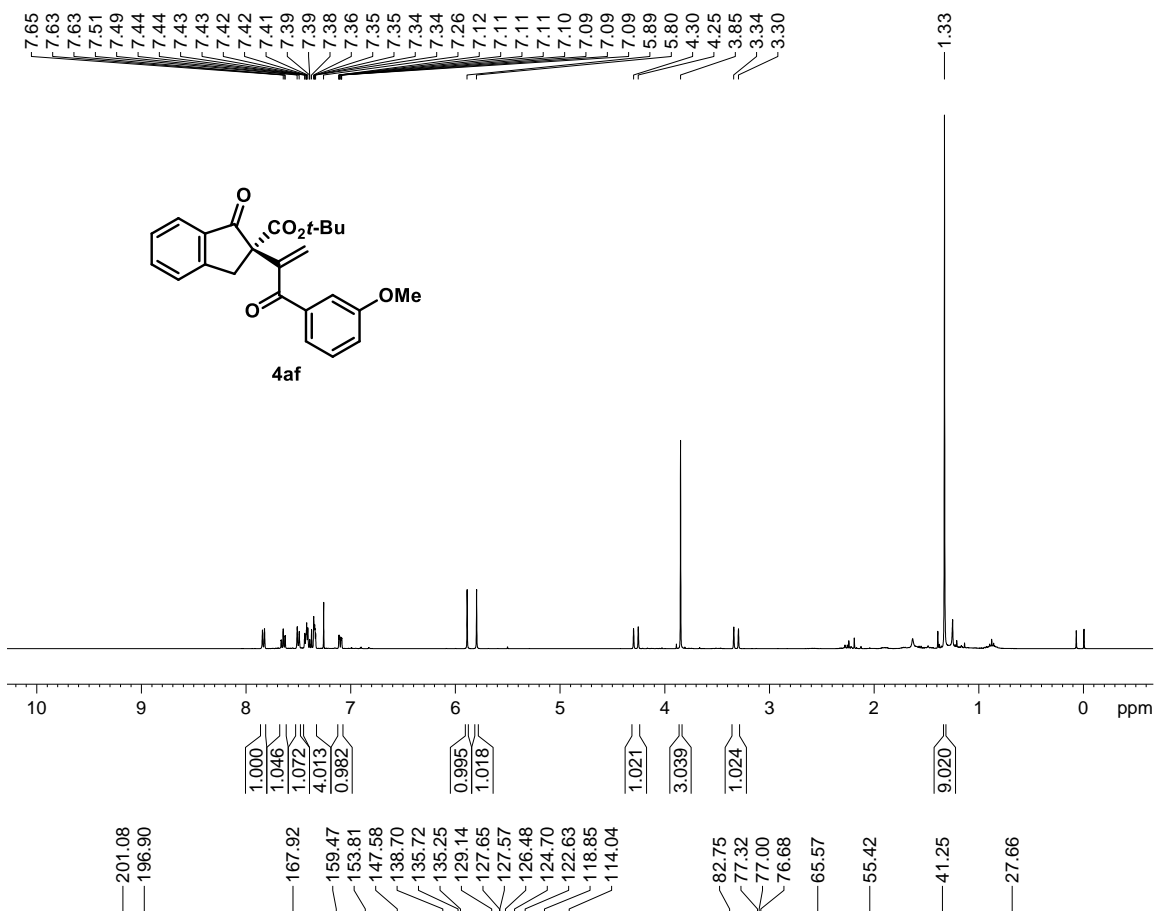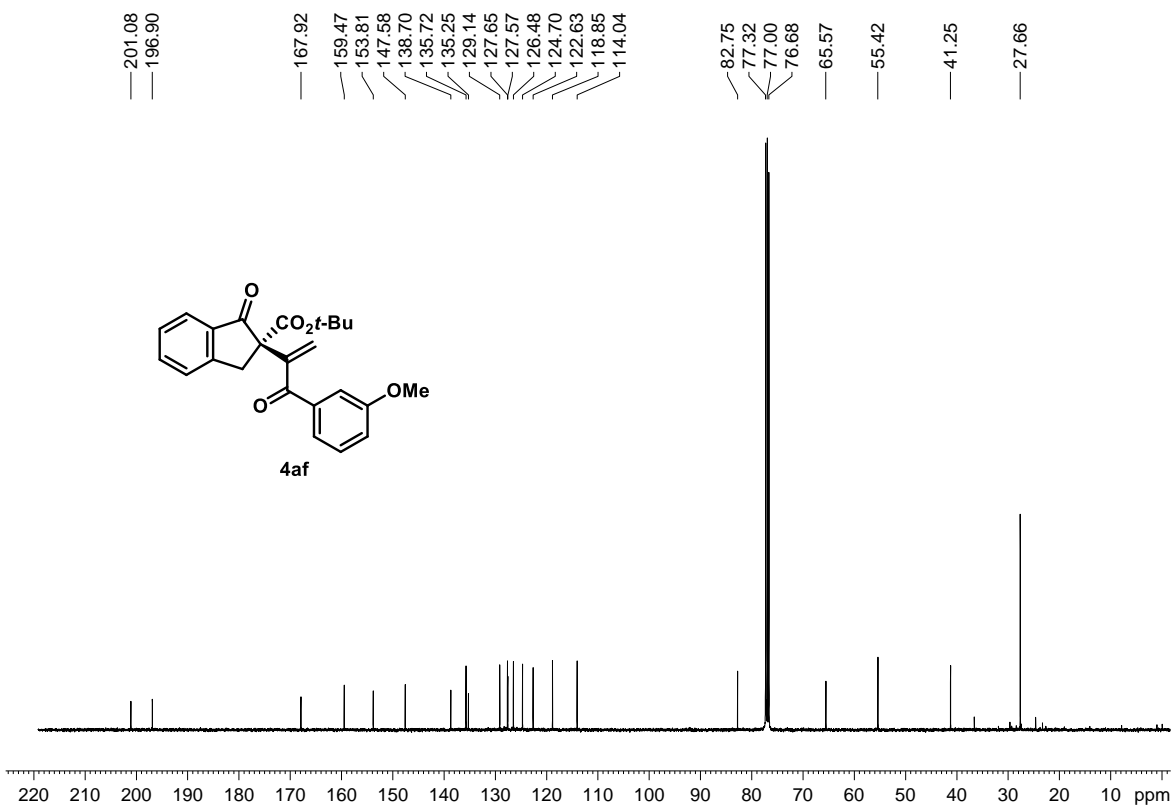

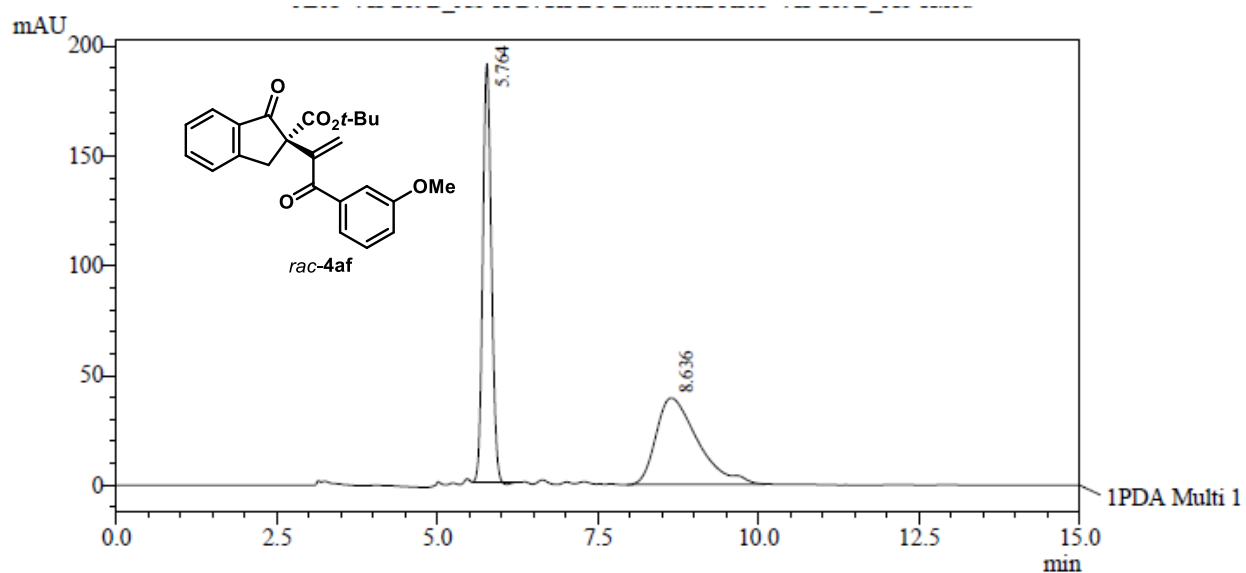

1 PDA Multi 1 / 254nm 4nm

PeakTable

PDA Ch1 254nm 4nm

| Peak# | Ret. Time | Area    | Area %  |
|-------|-----------|---------|---------|
| 1     | 5.764     | 1765094 | 49.733  |
| 2     | 8.636     | 1784073 | 50.267  |
| Total |           | 3549167 | 100.000 |

Daicel Chiralpak AS-H column (*n*-Hexane/EtOH = 95:5, 1.0 mL min<sup>-1</sup>, 20 °C, 254 nm)

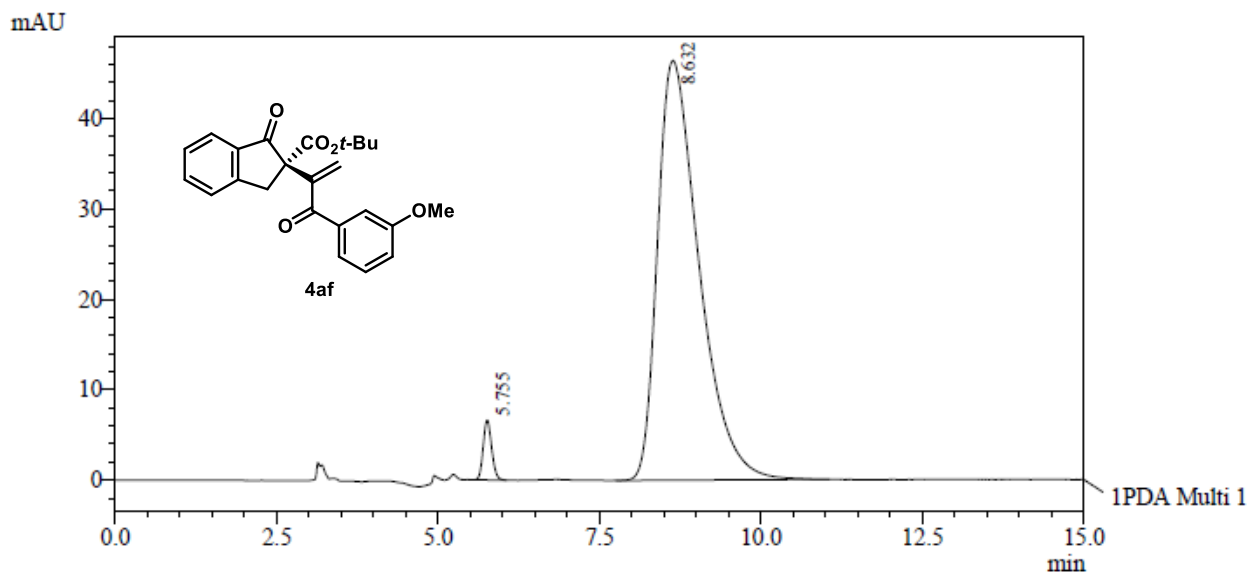

1 PDA Multi 1 / 254nm 4nm

PeakTable

PDA Ch1 254nm 4nm

| Peak# | Ret. Time | Area    | Area %  |
|-------|-----------|---------|---------|
| 1     | 5.755     | 60357   | 2.824   |
| 2     | 8.632     | 2077175 | 97.176  |
| Total |           | 2137532 | 100.000 |

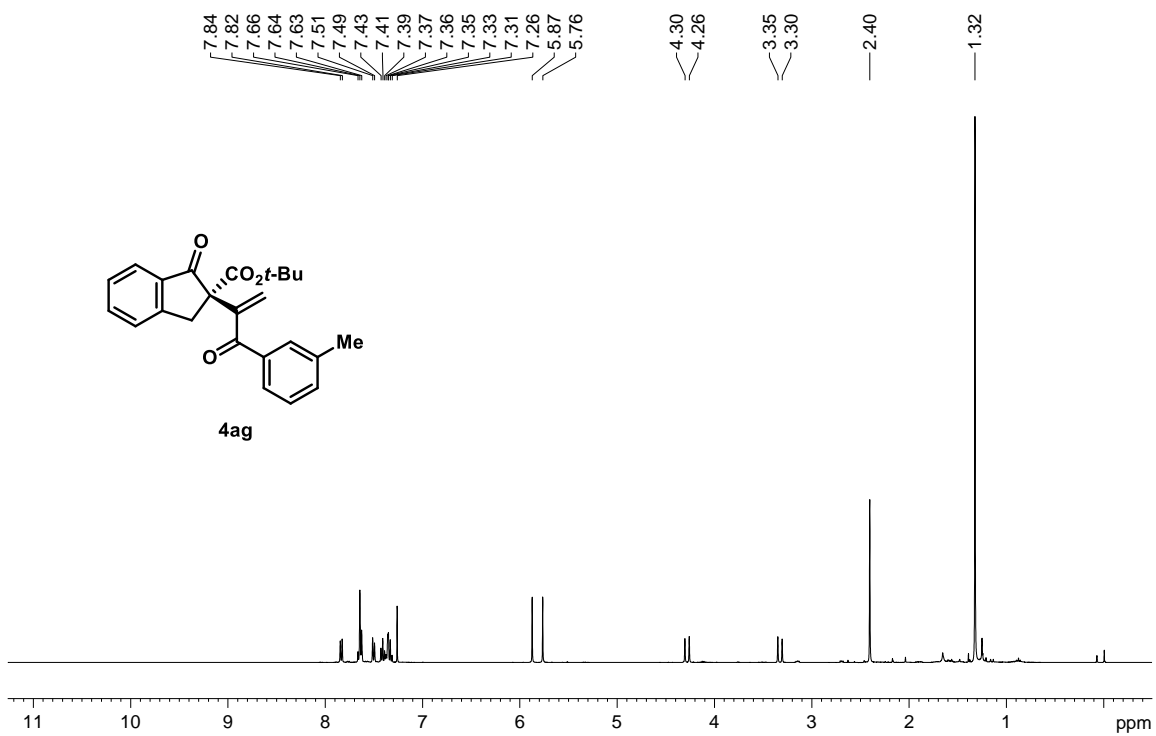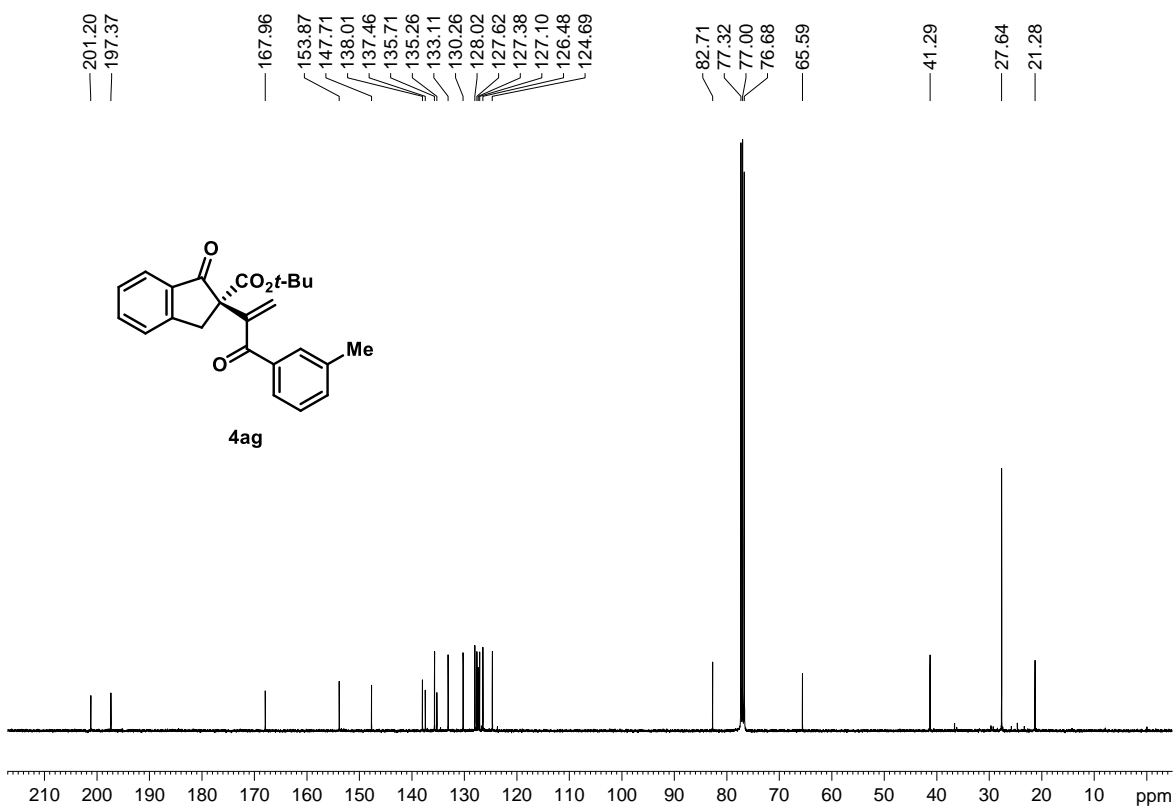

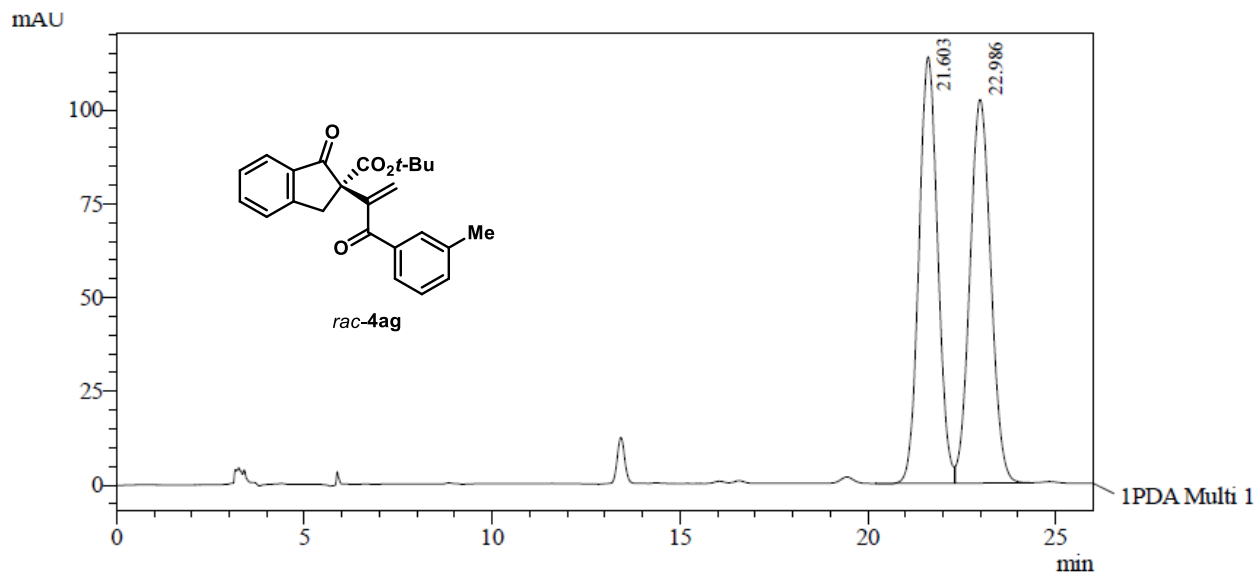

1 PDA Multi 1 / 254nm 4nm

PeakTable

PDA Ch1 254nm 4nm

| Peak# | Ret. Time | Area    | Area %  |
|-------|-----------|---------|---------|
| 1     | 21.603    | 3957952 | 49.905  |
| 2     | 22.986    | 3973055 | 50.095  |
| Total |           | 7931007 | 100.000 |

Daicel Chiralpak IG column (*n*-Hexane/EtOH = 95:5, 1.0 mL min<sup>-1</sup>, 20 °C, 254

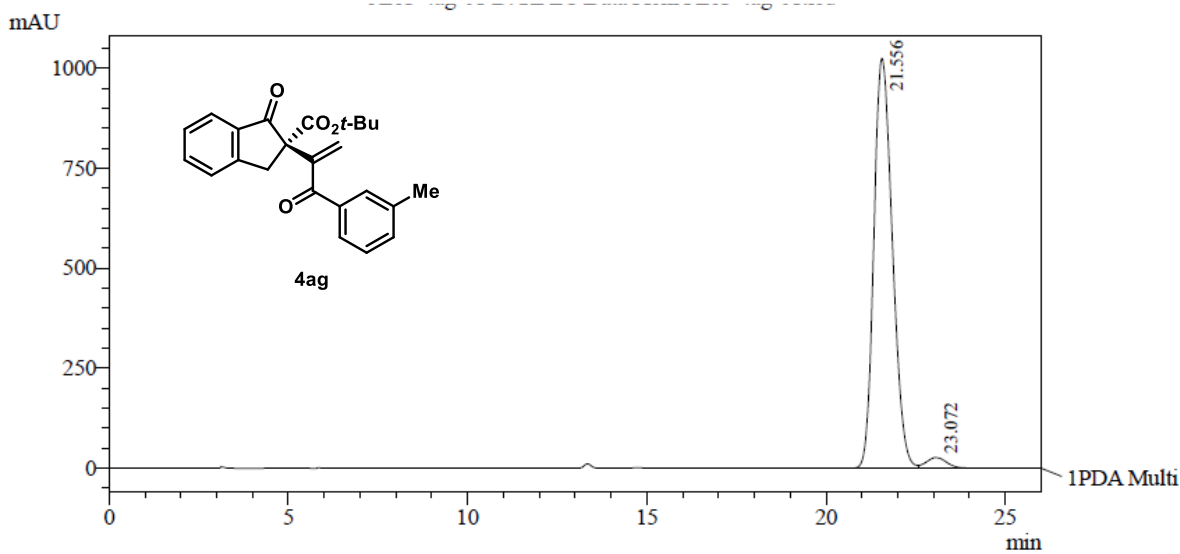

1 PDA Multi 1 / 254nm 4nm

PeakTable

PDA Ch1 254nm 4nm

| Peak# | Ret. Time | Area     | Area %  |
|-------|-----------|----------|---------|
| 1     | 21.556    | 36870630 | 97.227  |
| 2     | 23.072    | 1051770  | 2.773   |
| Total |           | 37922400 | 100.000 |

nm)

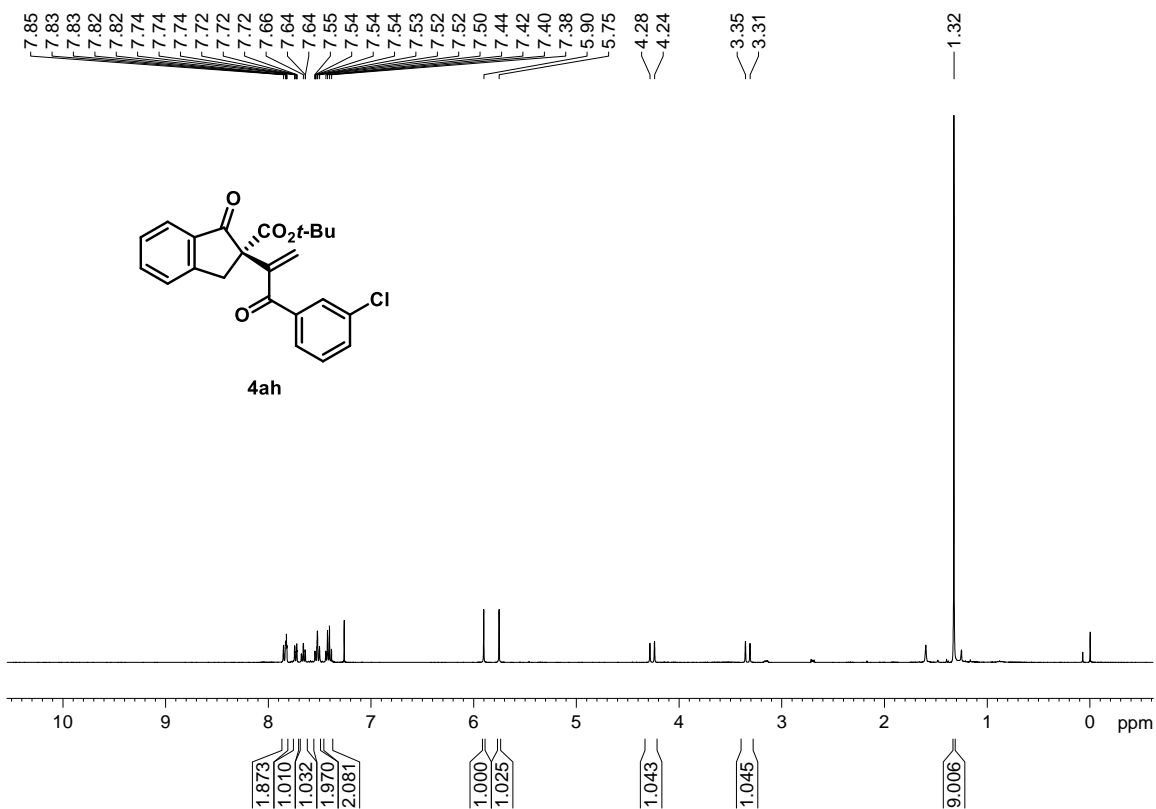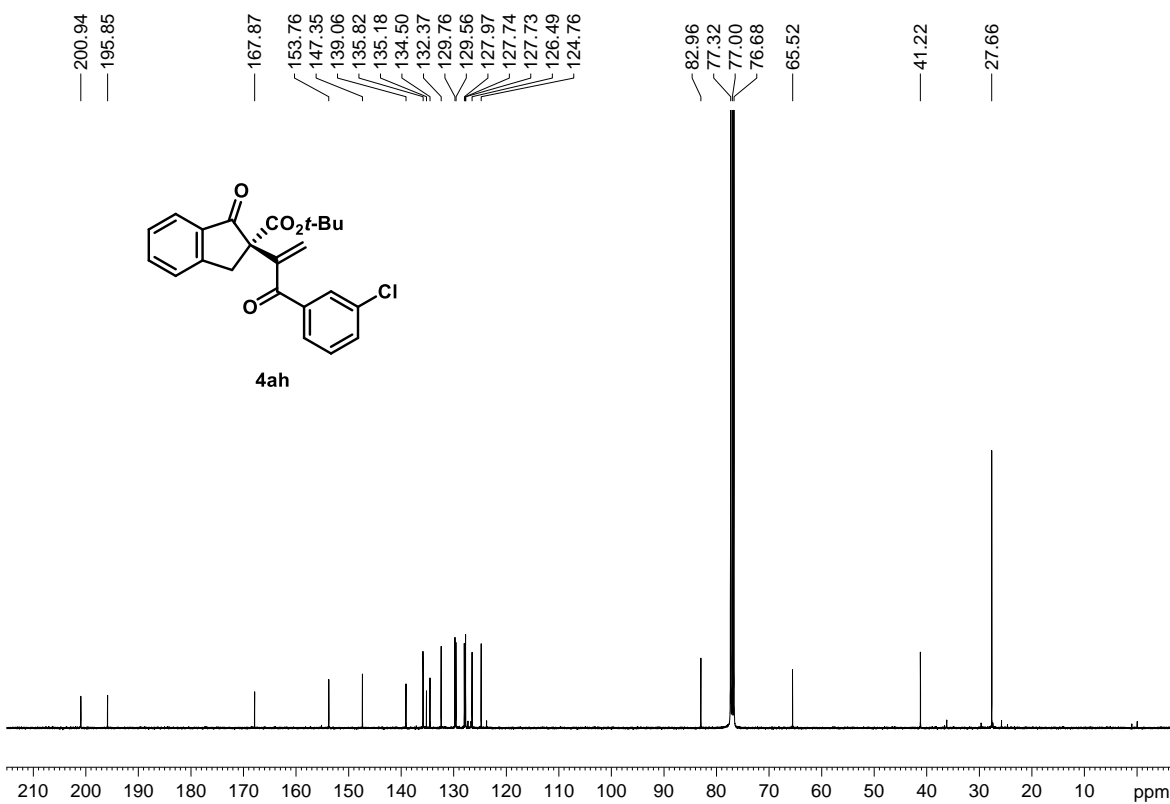



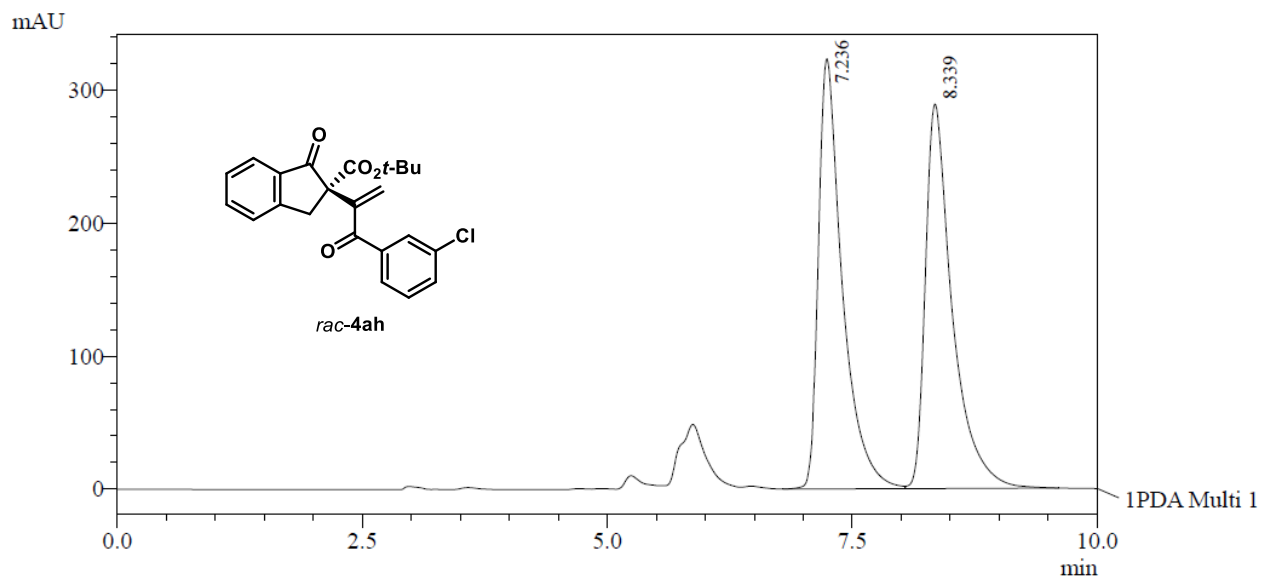

1 PDA Multi 1 / 254nm 4nm

PeakTable

PDA Ch1 254nm 4nm

| Peak# | Ret. Time | Area     | Area %  |
|-------|-----------|----------|---------|
| 1     | 7.236     | 5508303  | 49.937  |
| 2     | 8.339     | 5522214  | 50.063  |
| Total |           | 11030517 | 100.000 |

Daicel Chiralpak IG column (*n*-Hexane/IPA = 90:10, 1.0 mL min<sup>-1</sup>, 20 °C, 254 nm)

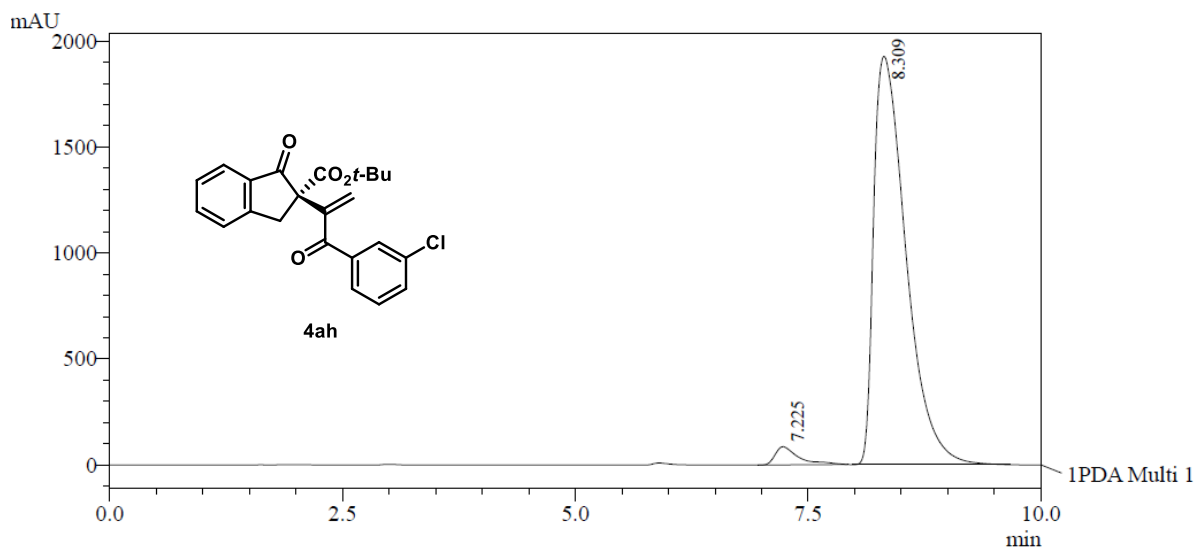

1 PDA Multi 1 / 254nm 4nm

PeakTable

PDA Ch1 254nm 4nm

| Peak# | Ret. Time | Area     | Area %  |
|-------|-----------|----------|---------|
| 1     | 7.225     | 1508143  | 3.144   |
| 2     | 8.309     | 46457758 | 96.856  |
| Total |           | 47965901 | 100.000 |

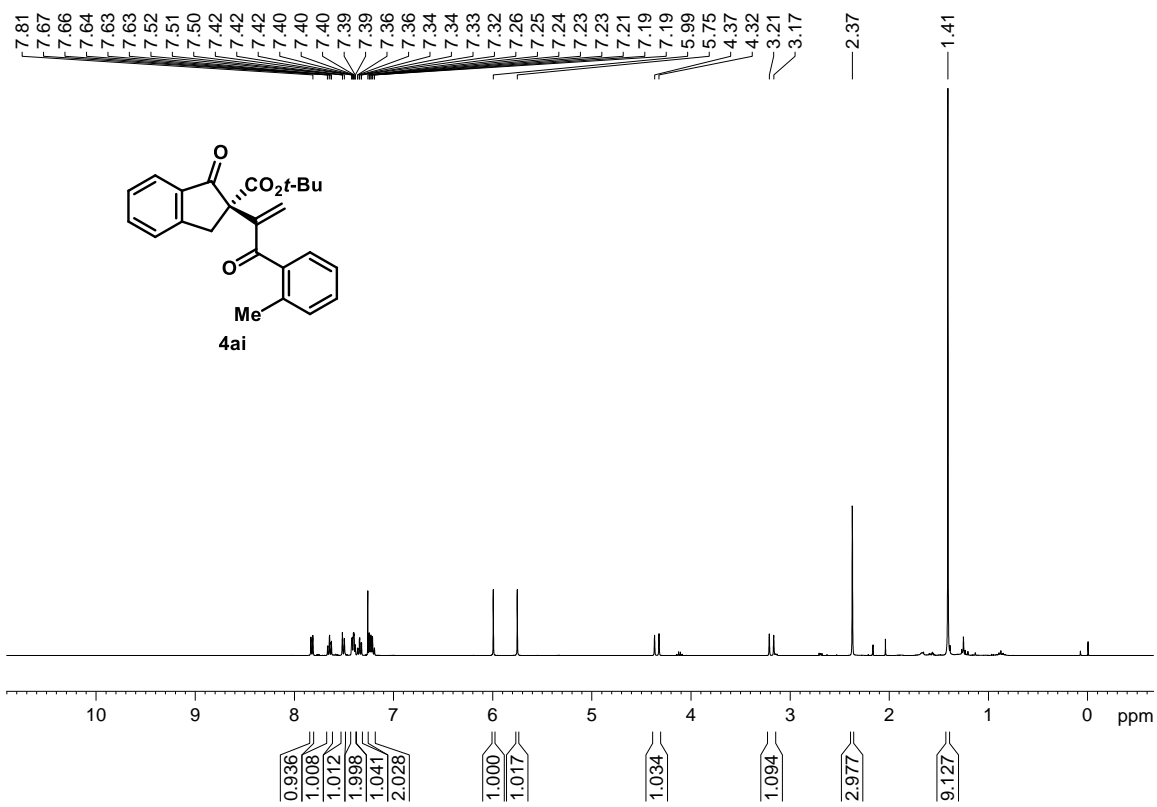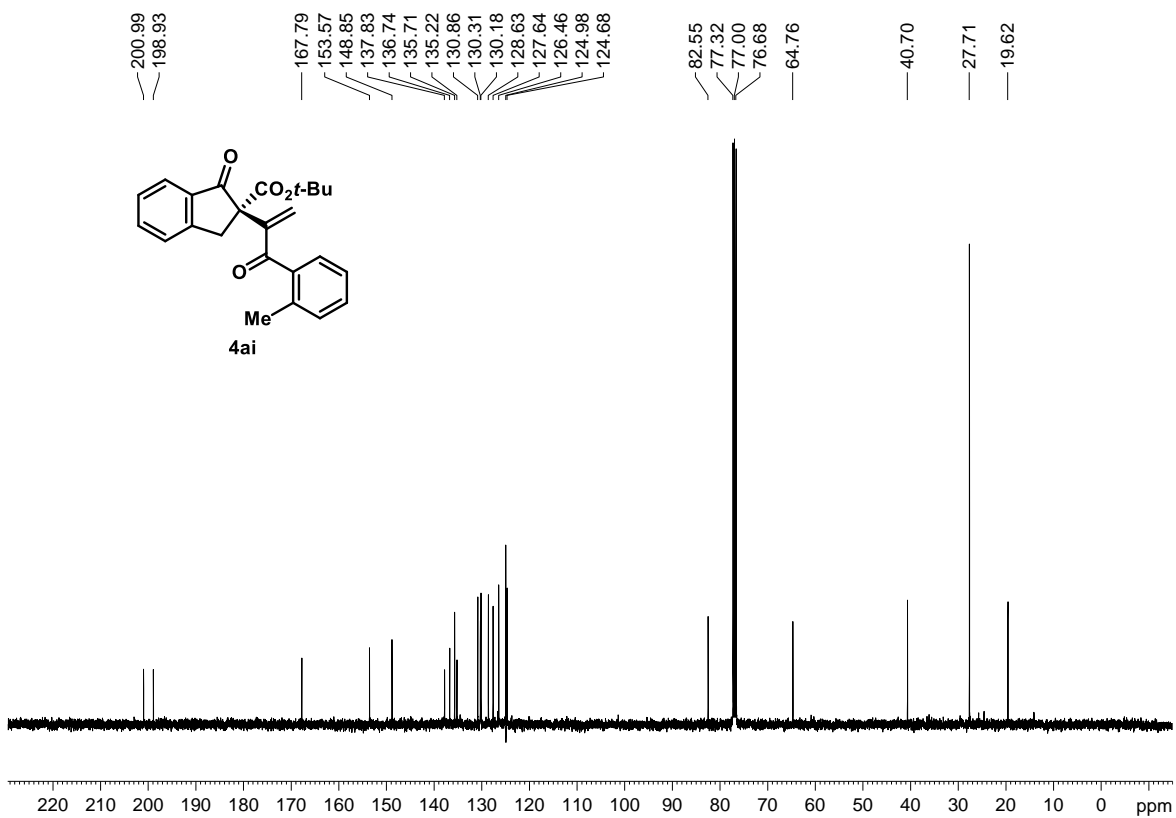

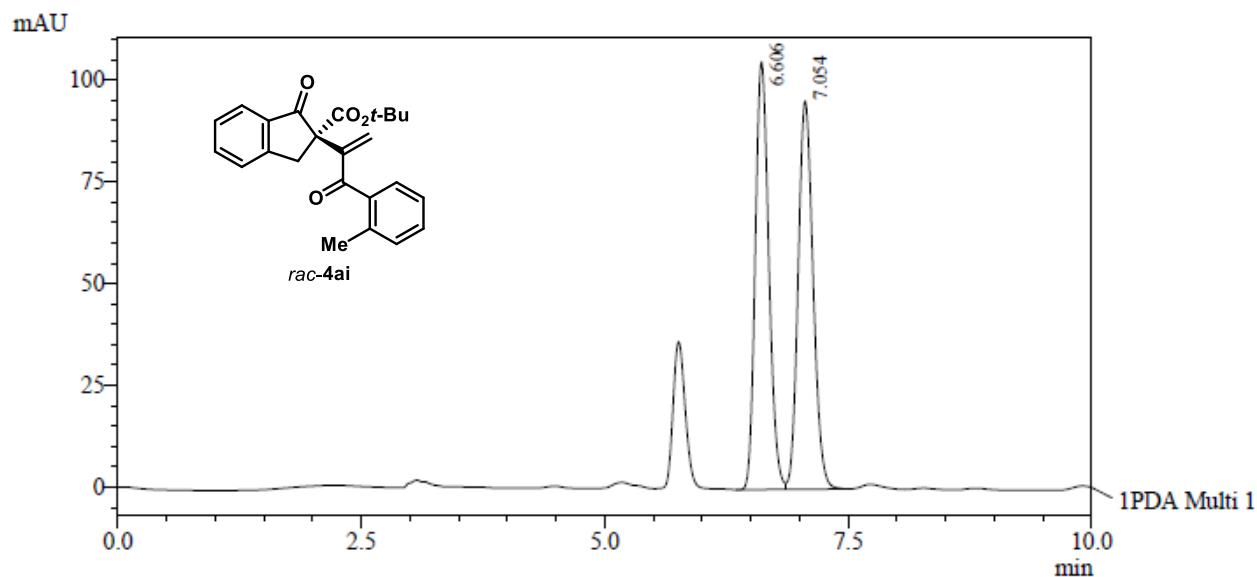

1 PDA Multi 1 / 254nm 4nm

PeakTable

PDA Ch1 254nm 4nm

| Peak# | Ret. Time | Area    | Area %  |
|-------|-----------|---------|---------|
| 1     | 6.606     | 1015388 | 49.877  |
| 2     | 7.054     | 1020416 | 50.123  |
| Total |           | 2035804 | 100.000 |

Daicel Chiralpak AD-H column (*n*-Hexane/IPA = 90:10, 1.0 mL min<sup>-1</sup>, 20 °C, 254 nm)

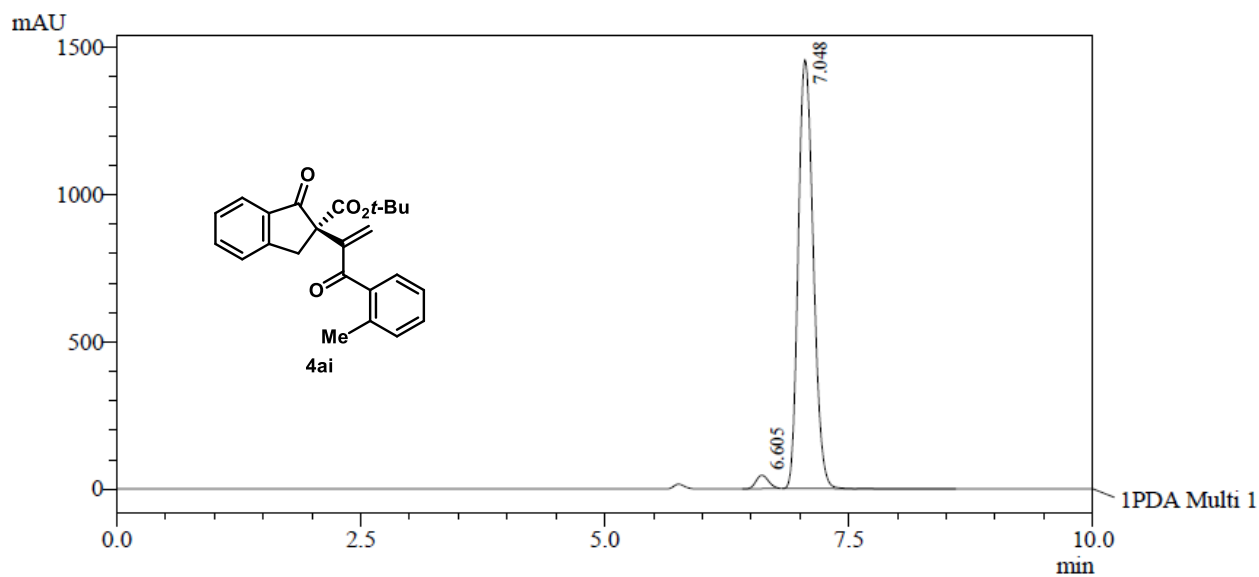

1 PDA Multi 1 / 254nm 4nm

PeakTable

PDA Ch1 254nm 4nm

| Peak# | Ret. Time | Area     | Area %  |
|-------|-----------|----------|---------|
| 1     | 6.605     | 408127   | 2.540   |
| 2     | 7.048     | 15659442 | 97.460  |
| Total |           | 16067569 | 100.000 |

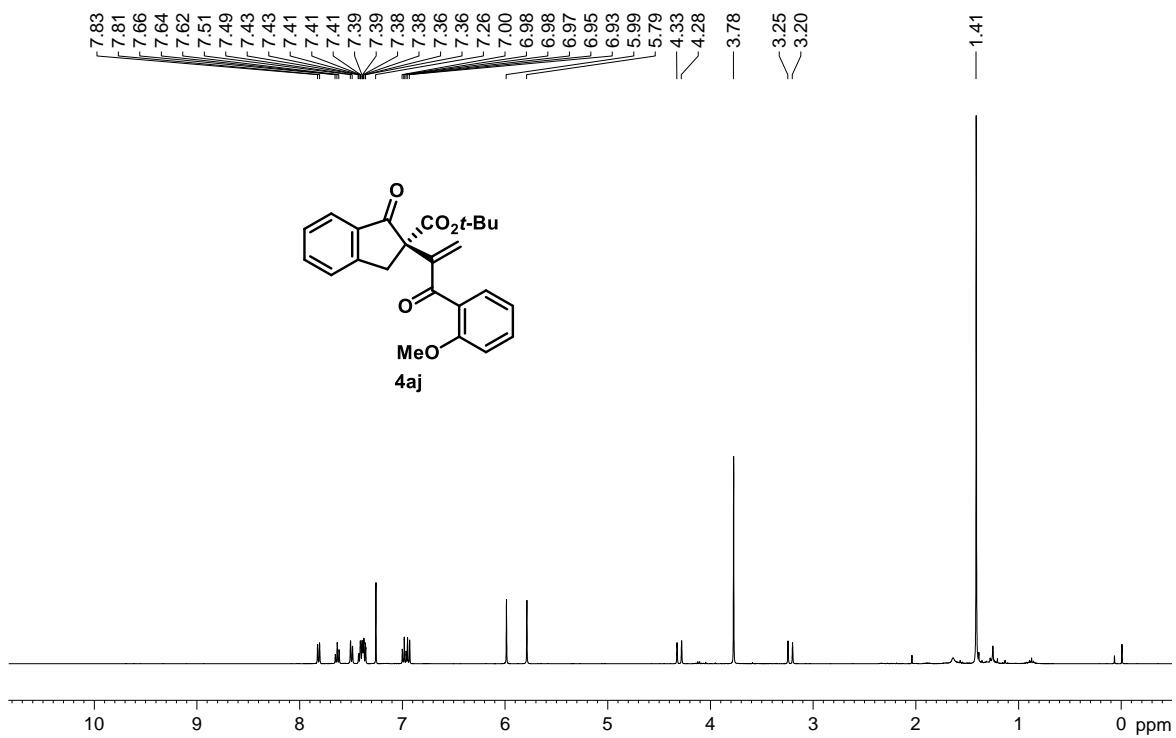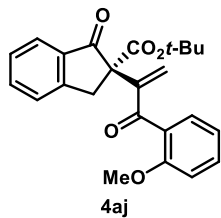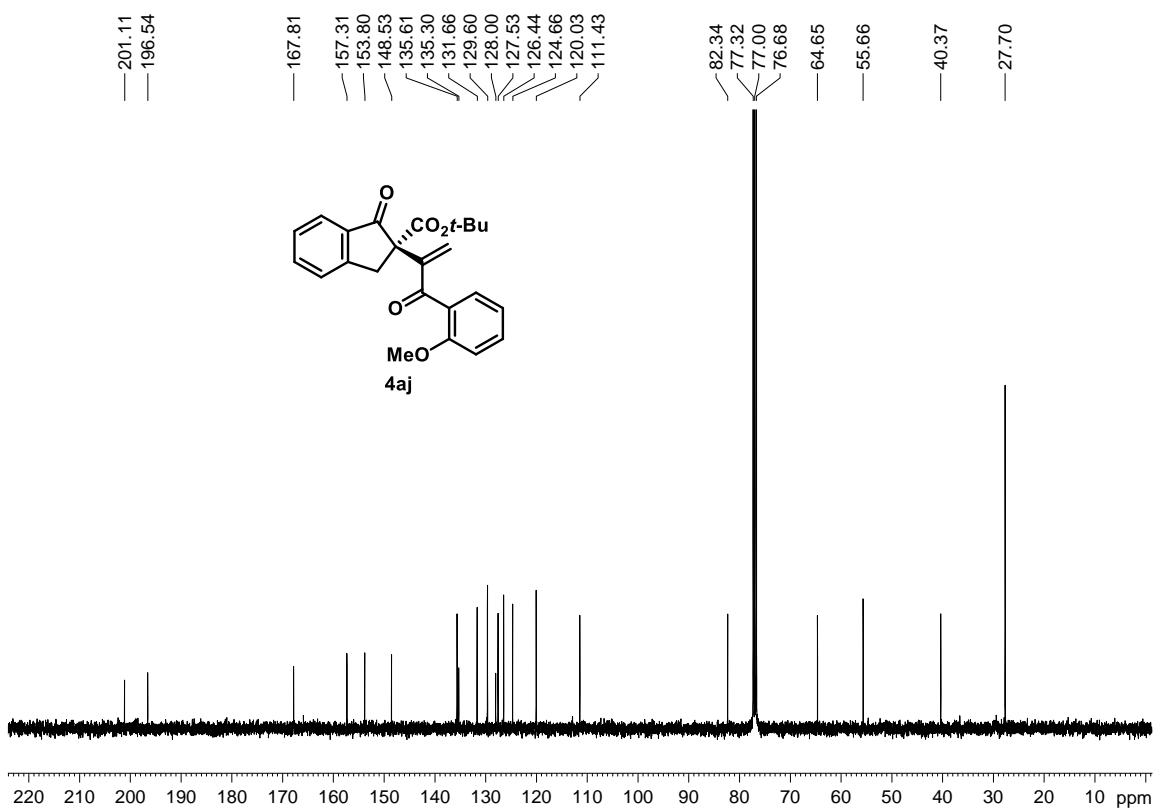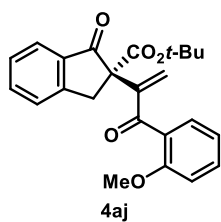

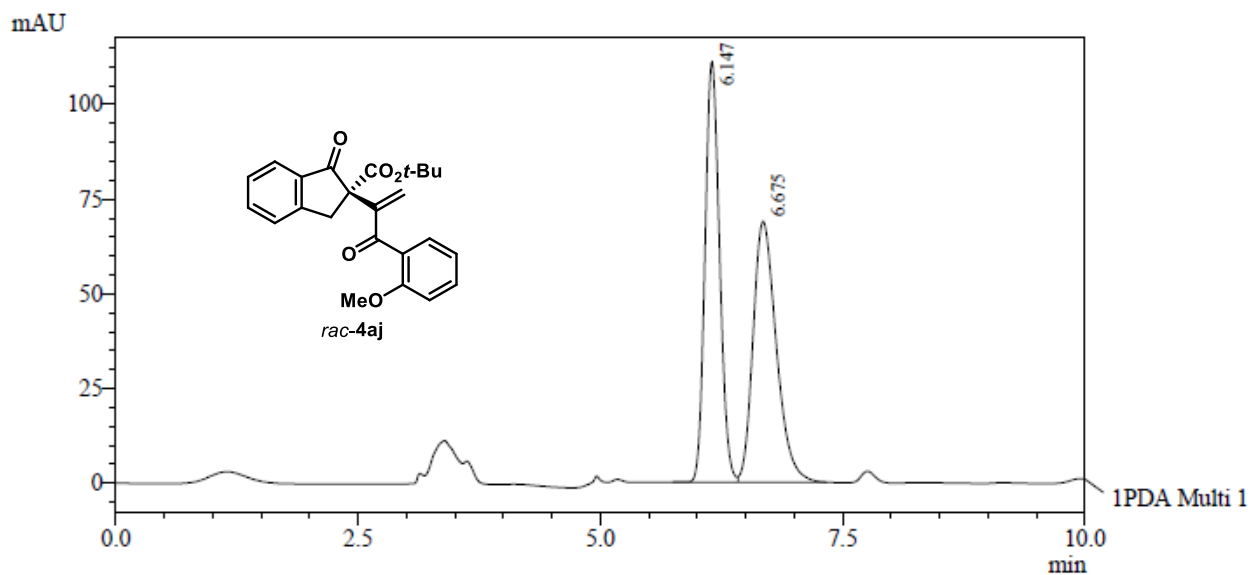

1 PDA Multi 1 / 254nm 4nm

PeakTable

PDA Ch1 254nm 4nm

| Peak# | Ret. Time | Area    | Area %  |
|-------|-----------|---------|---------|
| 1     | 6.147     | 1161038 | 50.227  |
| 2     | 6.675     | 1150541 | 49.773  |
| Total |           | 2311579 | 100.000 |

Daicel Chiralpak AS-H column (n-Hexane/EtOH = 95:5, 1.0 mL min<sup>-1</sup>, 20 °C, 254 nm)

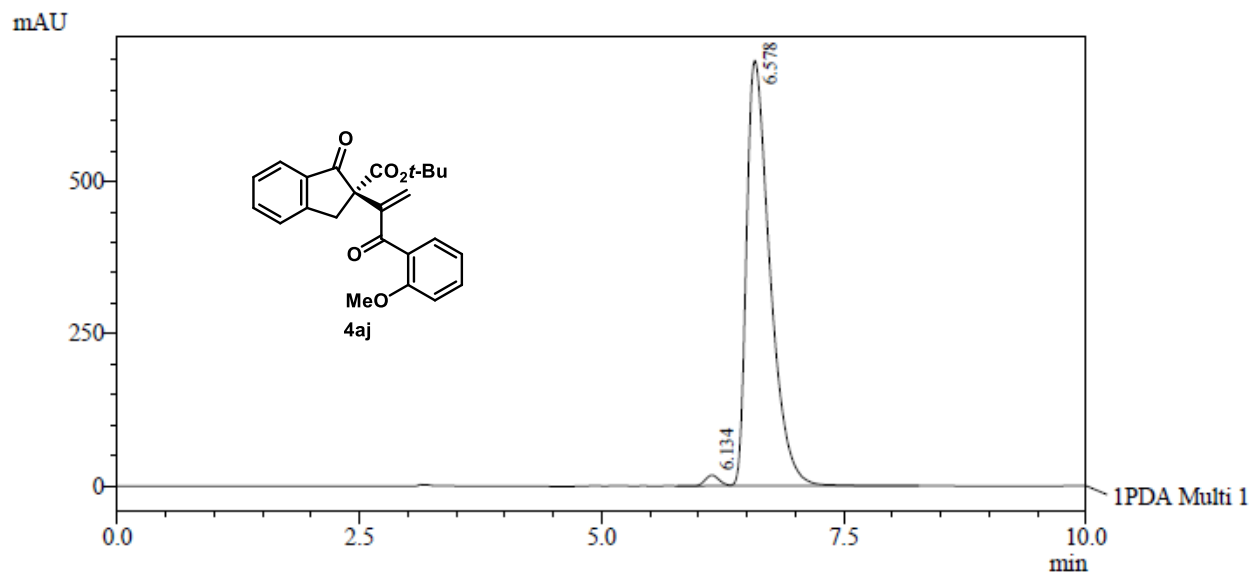

1 PDA Multi 1 / 254nm 4nm

PeakTable

PDA Ch1 254nm 4nm

| Peak# | Ret. Time | Area     | Area %  |
|-------|-----------|----------|---------|
| 1     | 6.134     | 178517   | 1.500   |
| 2     | 6.578     | 11723617 | 98.500  |
| Total |           | 11902134 | 100.000 |

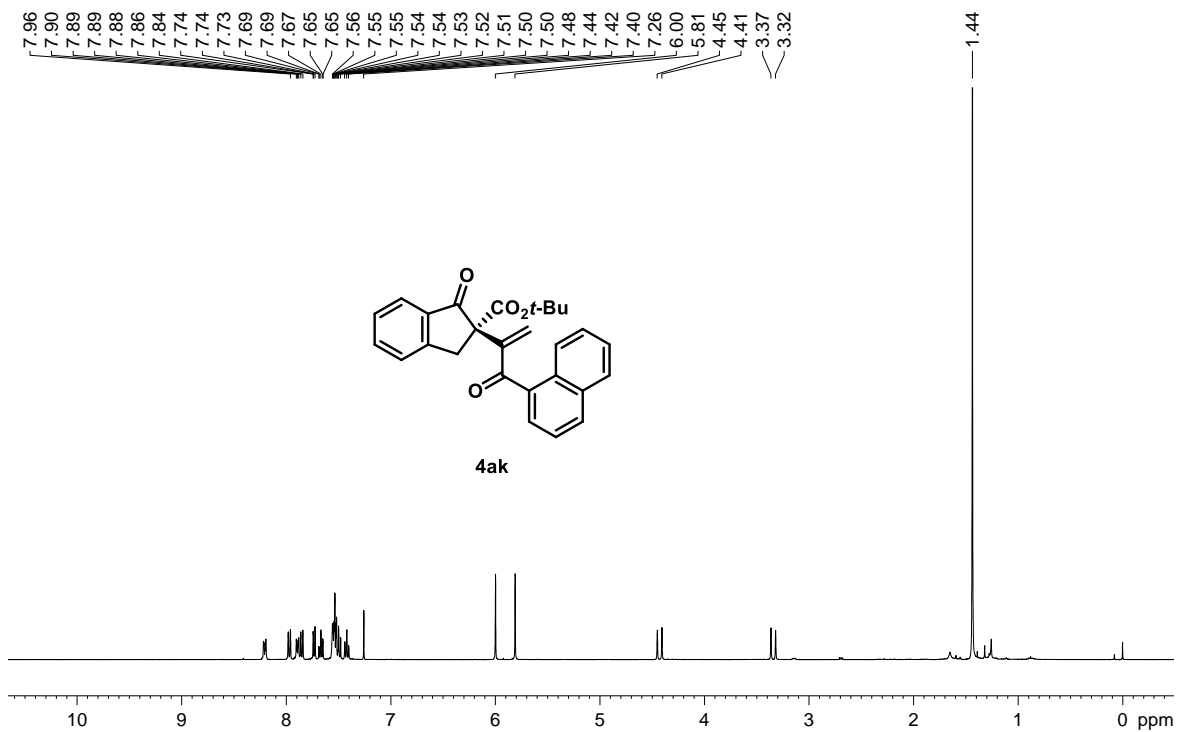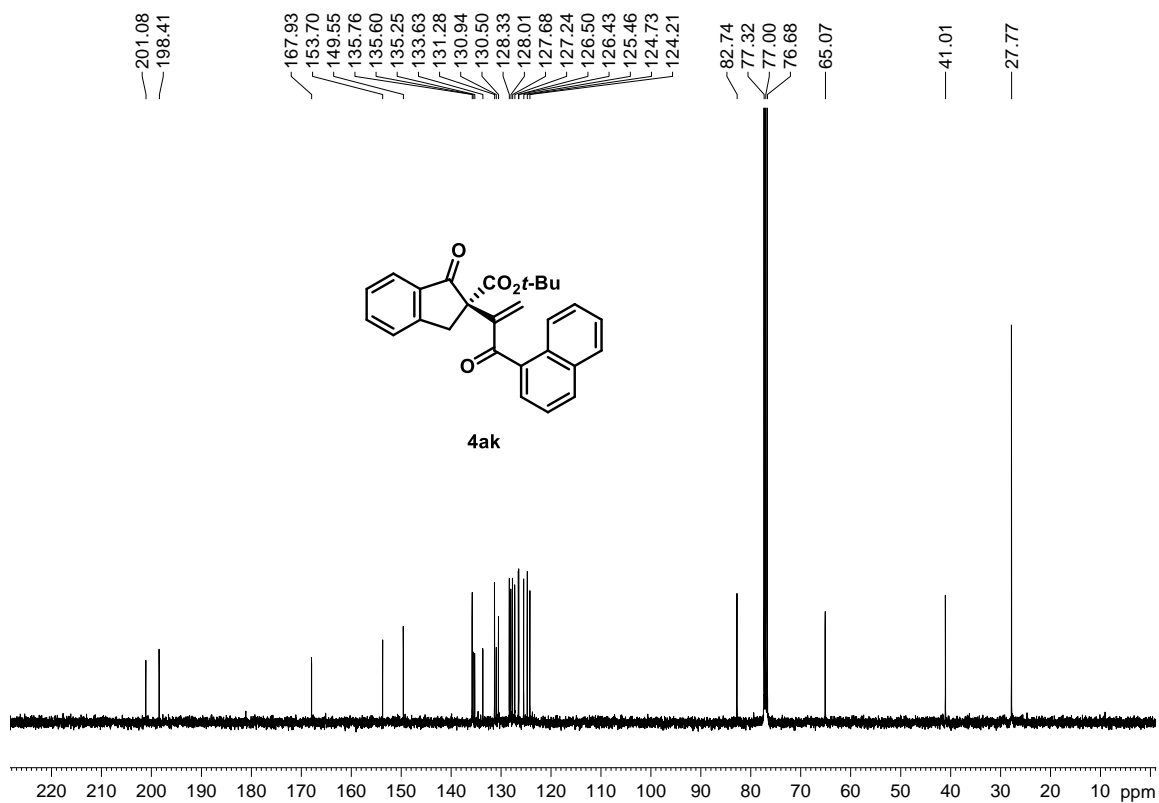

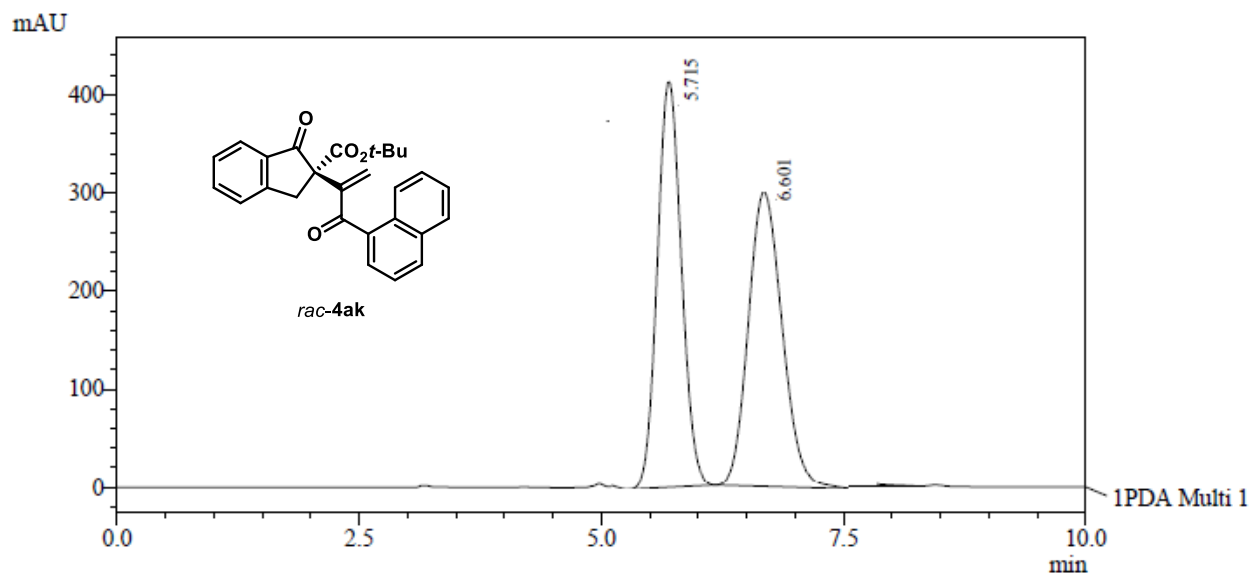

1 PDA Multi 1 / 254nm 4nm

PeakTable

PDA Ch1 254nm 4nm

| Peak# | Ret. Time | Area    | Area %  |
|-------|-----------|---------|---------|
| 1     | 5.715     | 836145  | 49.586  |
| 2     | 6.601     | 850102  | 50.414  |
| Total |           | 1686248 | 100.000 |

Daicel Chiralpak AS-H column (*n*-Hexane/EtOH = 95:5, 1.0 mL min<sup>-1</sup>, 20 °C, 254 nm)

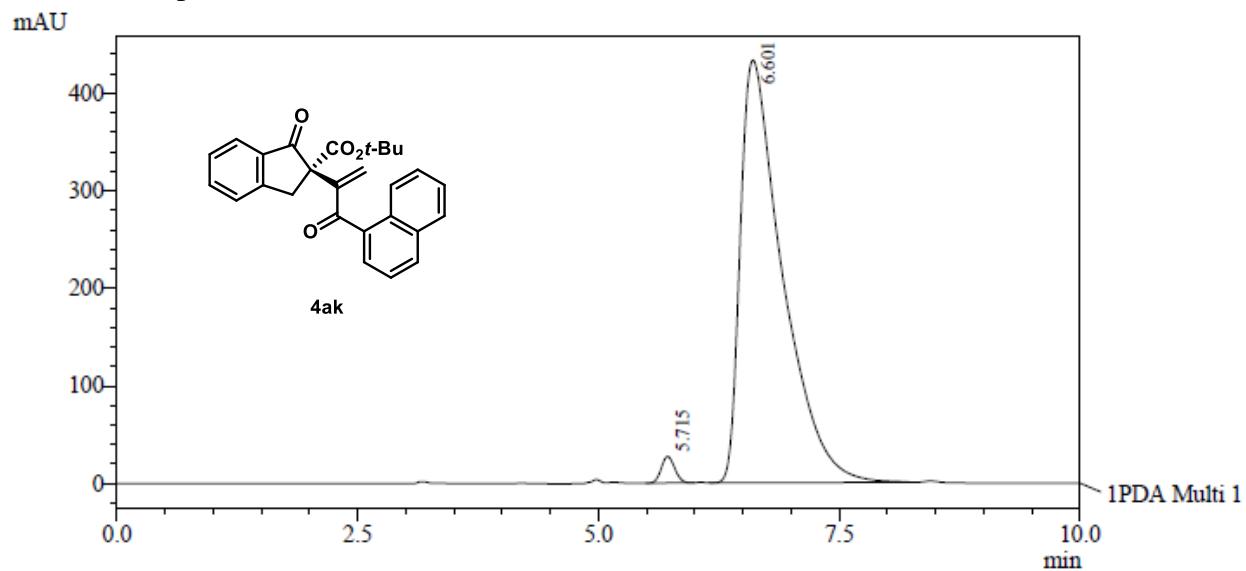

1 PDA Multi 1 / 254nm 4nm

PeakTable

PDA Ch1 254nm 4nm

| Peak# | Ret. Time | Area     | Area %  |
|-------|-----------|----------|---------|
| 1     | 5.715     | 261275   | 1.941   |
| 2     | 6.601     | 13198951 | 98.059  |
| Total |           | 13460226 | 100.000 |

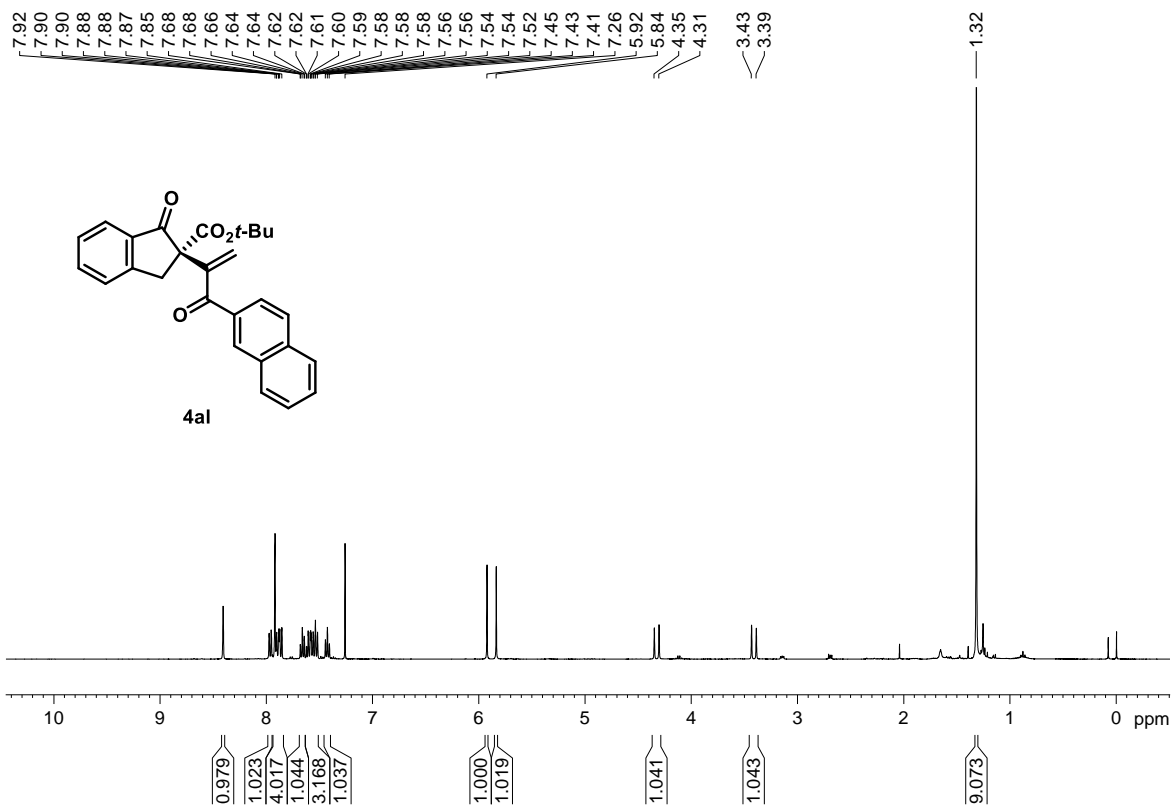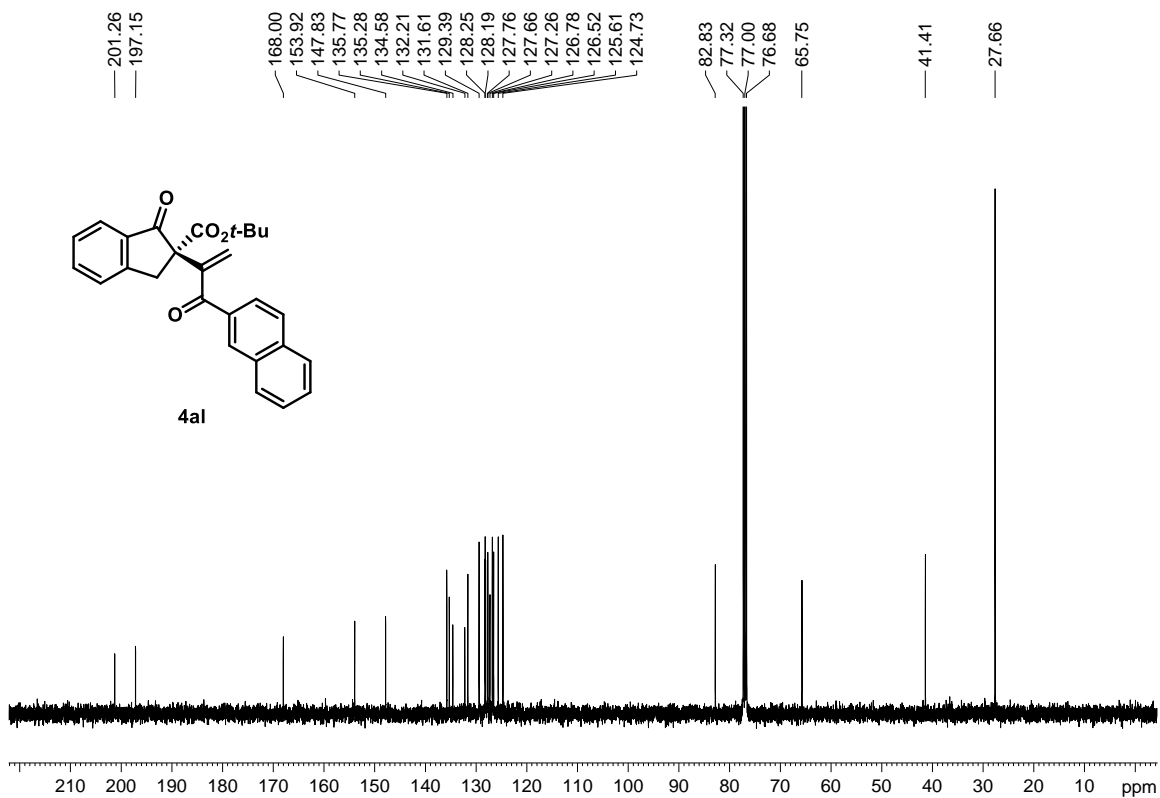



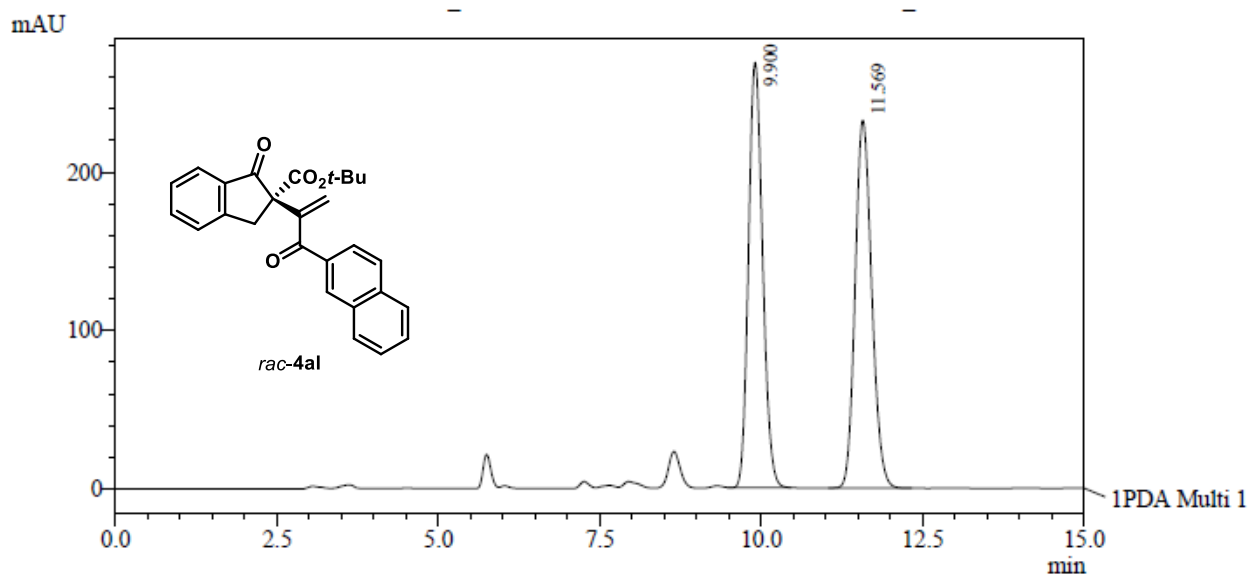

1 PDA Multi 1 / 254nm 4nm

PeakTable

PDA Ch1 254nm 4nm

| Peak# | Ret. Time | Area    | Area %  |
|-------|-----------|---------|---------|
| 1     | 9.900     | 4097008 | 49.666  |
| 2     | 11.569    | 4152104 | 50.334  |
| Total |           | 8249112 | 100.000 |

Daicel Chiralpak AD-H column (*n*-Hexane/IPA = 90:10, 1.0 mL min<sup>-1</sup>, 20 °C, 254 nm)

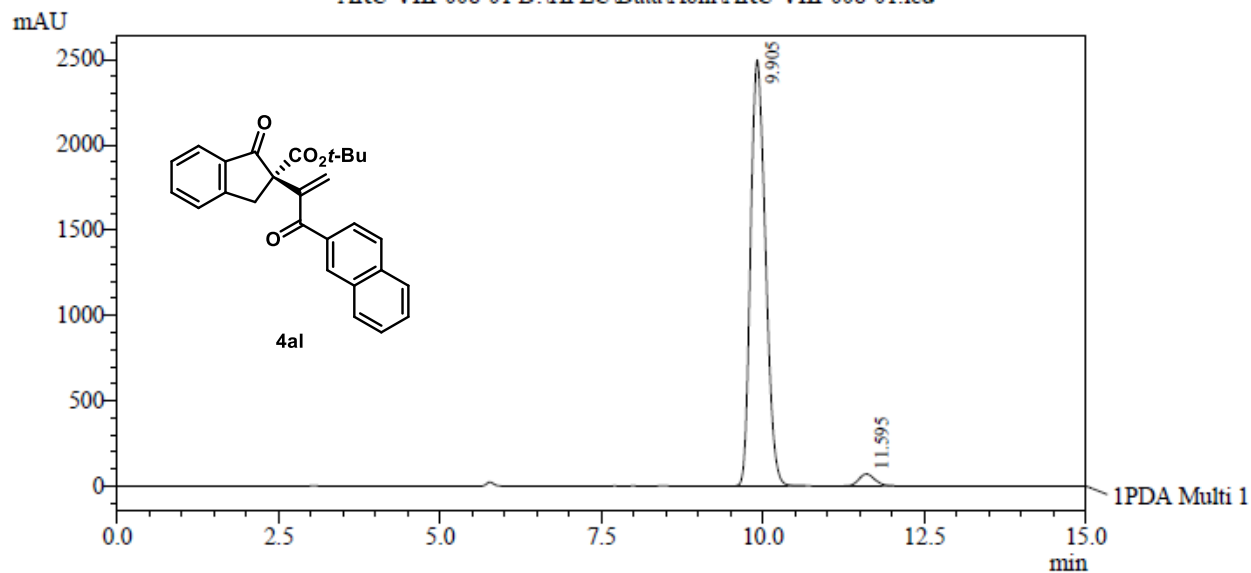

1 PDA Multi 1 / 254nm 4nm

PeakTable

PDA Ch1 254nm 4nm

| Peak# | Ret. Time | Area     | Area %  |
|-------|-----------|----------|---------|
| 1     | 9.905     | 40029105 | 97.075  |
| 2     | 11.595    | 1206070  | 2.925   |
| Total |           | 41235176 | 100.000 |

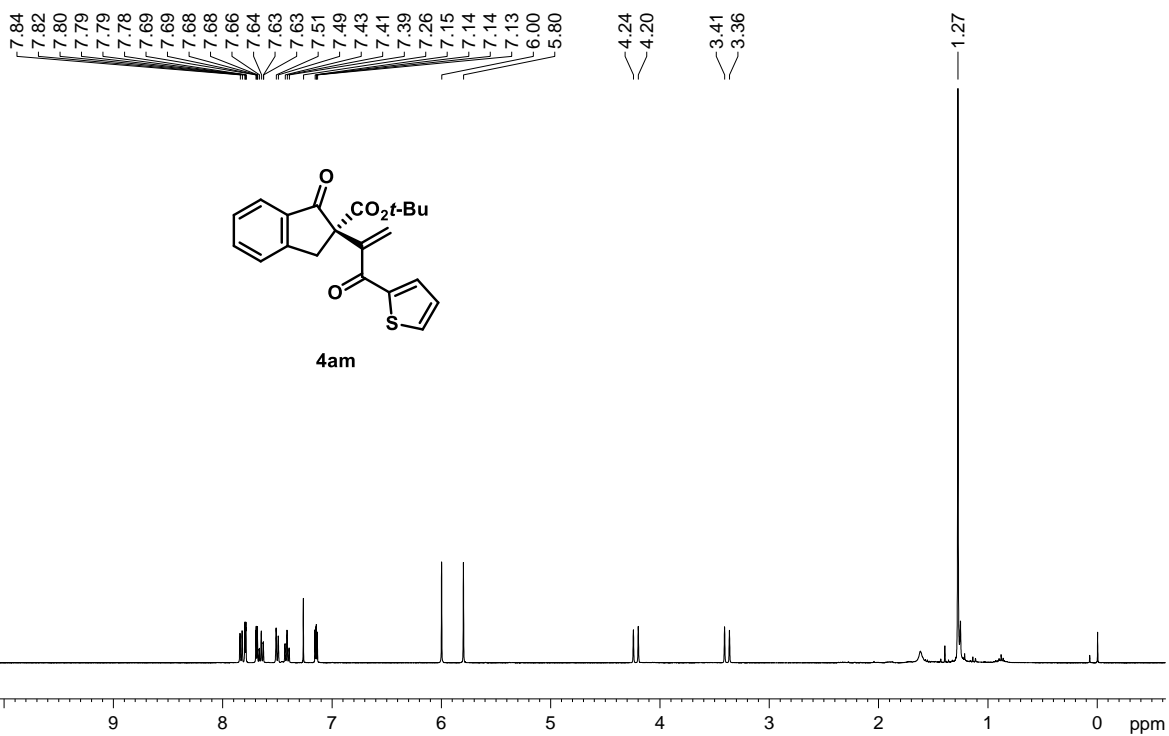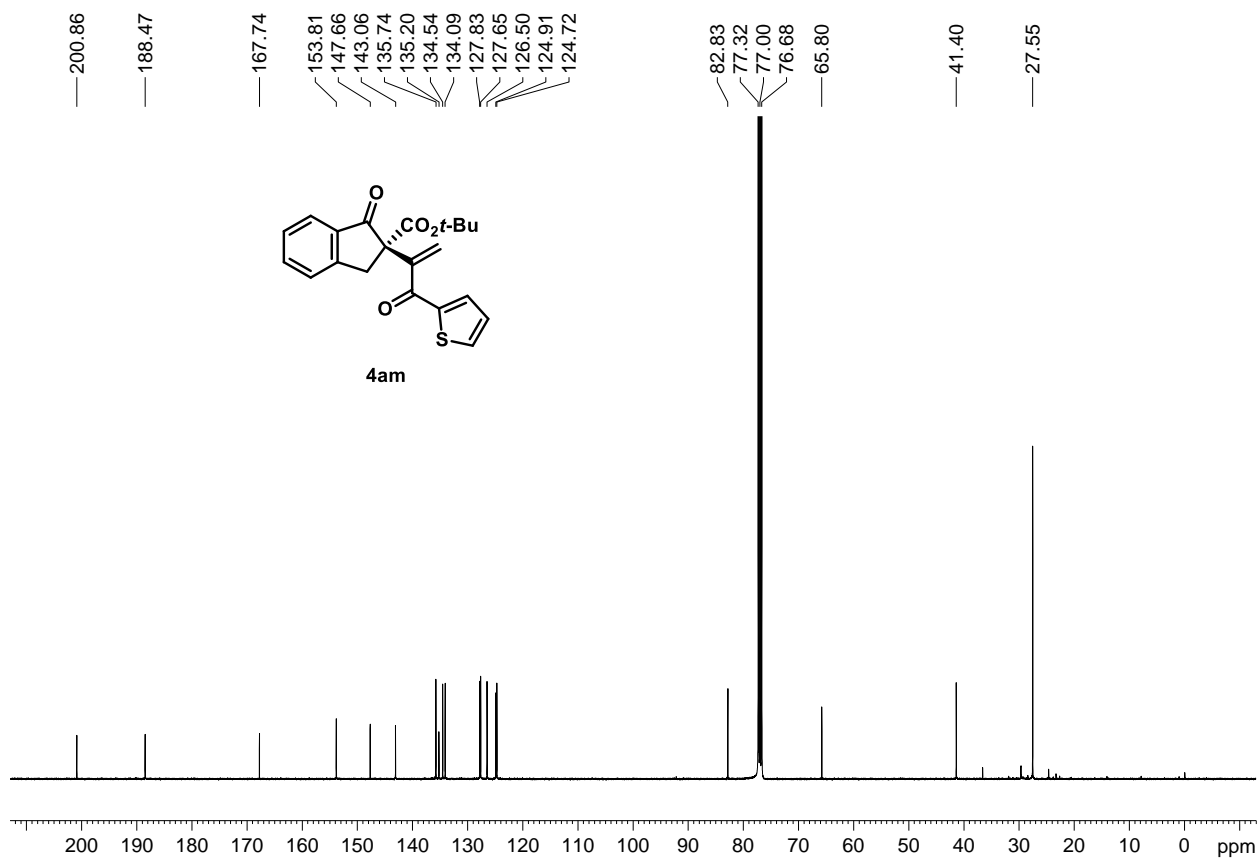

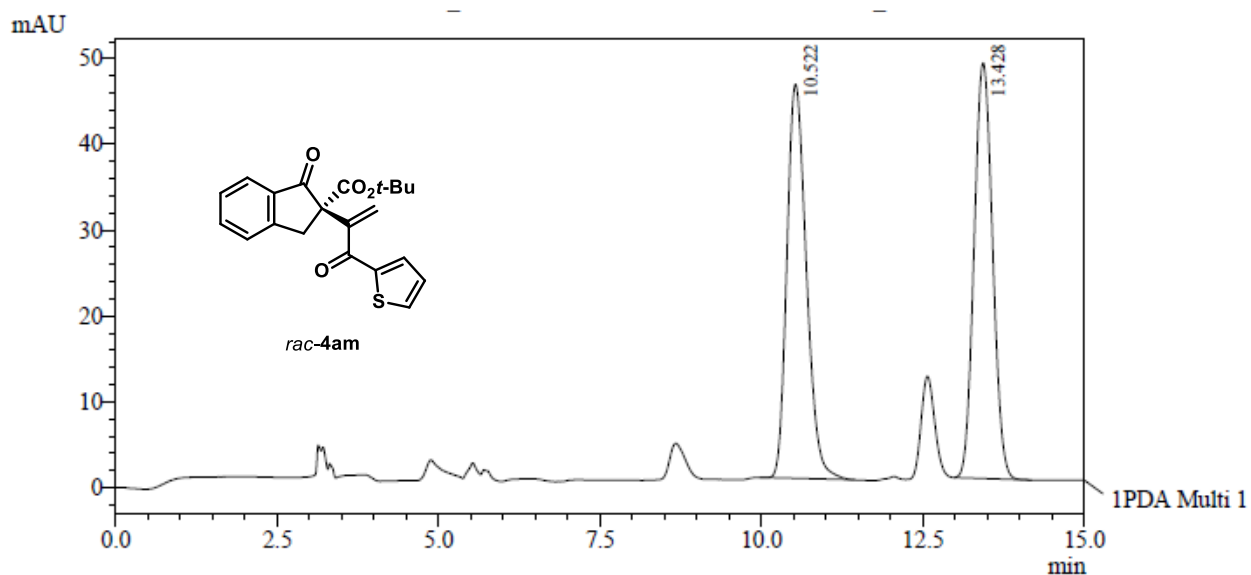

1 PDA Multi 1 / 254nm 4nm

PeakTable

PDA Ch1 254nm 4nm

| Peak# | Ret. Time | Area    | Area %  |
|-------|-----------|---------|---------|
| 1     | 10.522    | 962969  | 49.970  |
| 2     | 13.428    | 964121  | 50.030  |
| Total |           | 1927089 | 100.000 |

Daicel Chiralpak AD-H column (*n*-Hexane/EtOH = 95:5, 1.0 mL min<sup>-1</sup>, 20 °C, 254 nm)

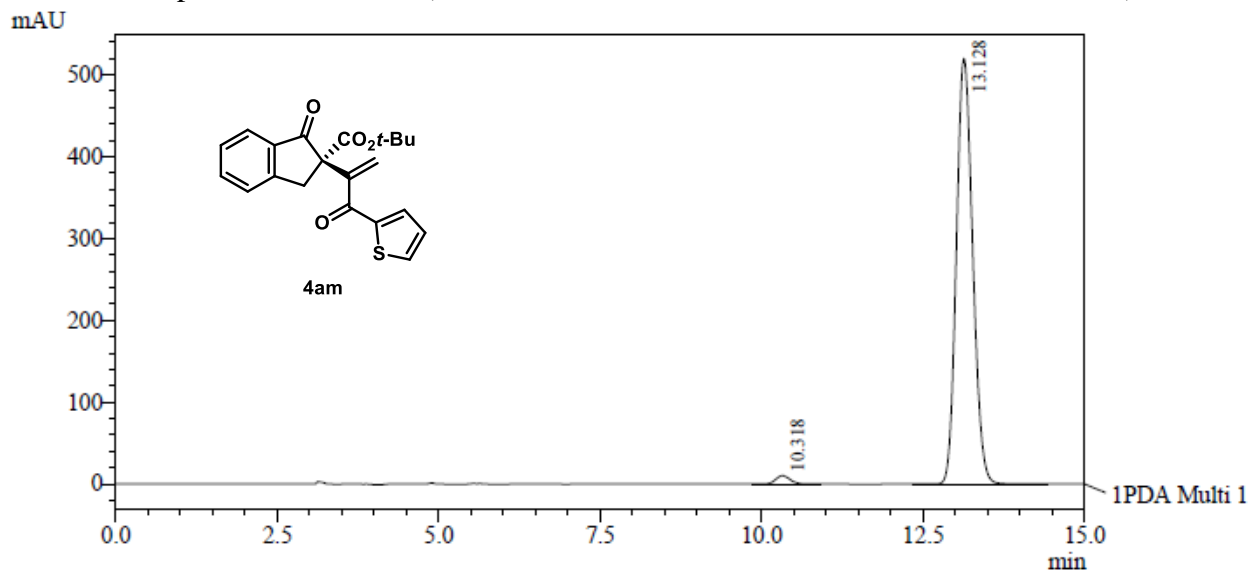

1 PDA Multi 1 / 254nm 4nm

PeakTable

PDA Ch1 254nm 4nm

| Peak# | Ret. Time | Area    | Area %  |
|-------|-----------|---------|---------|
| 1     | 10.318    | 158092  | 1.699   |
| 2     | 13.128    | 9144511 | 98.301  |
| Total |           | 9302603 | 100.000 |

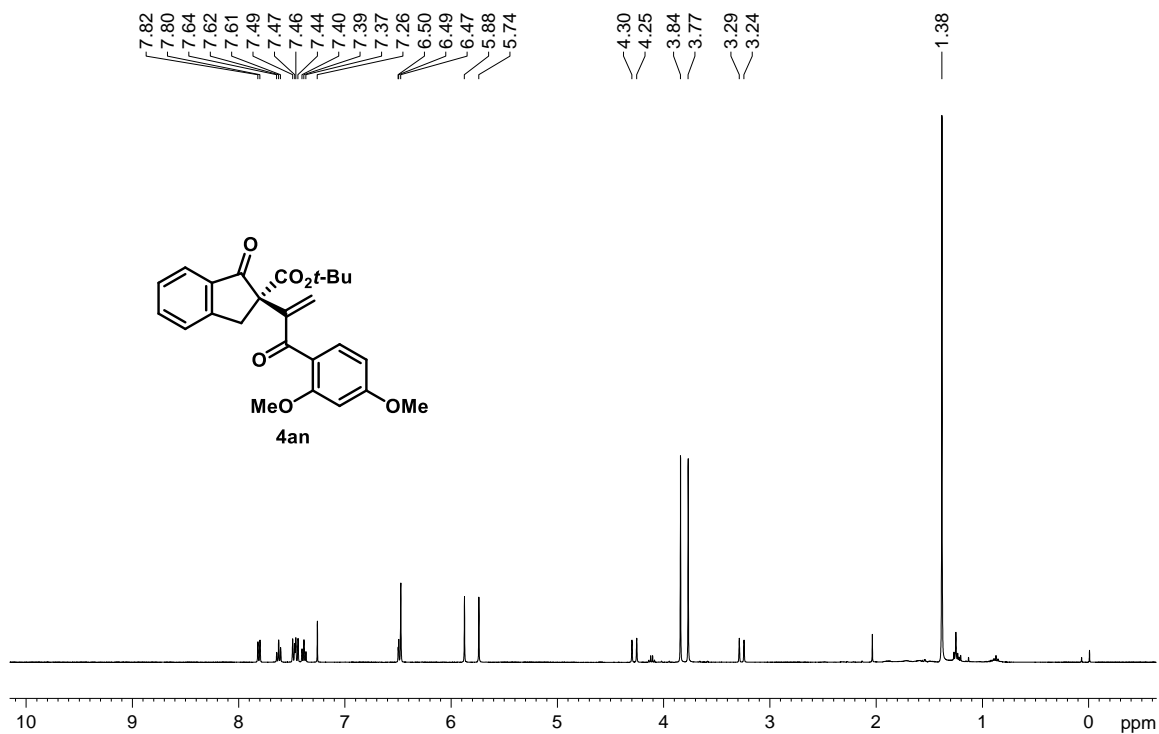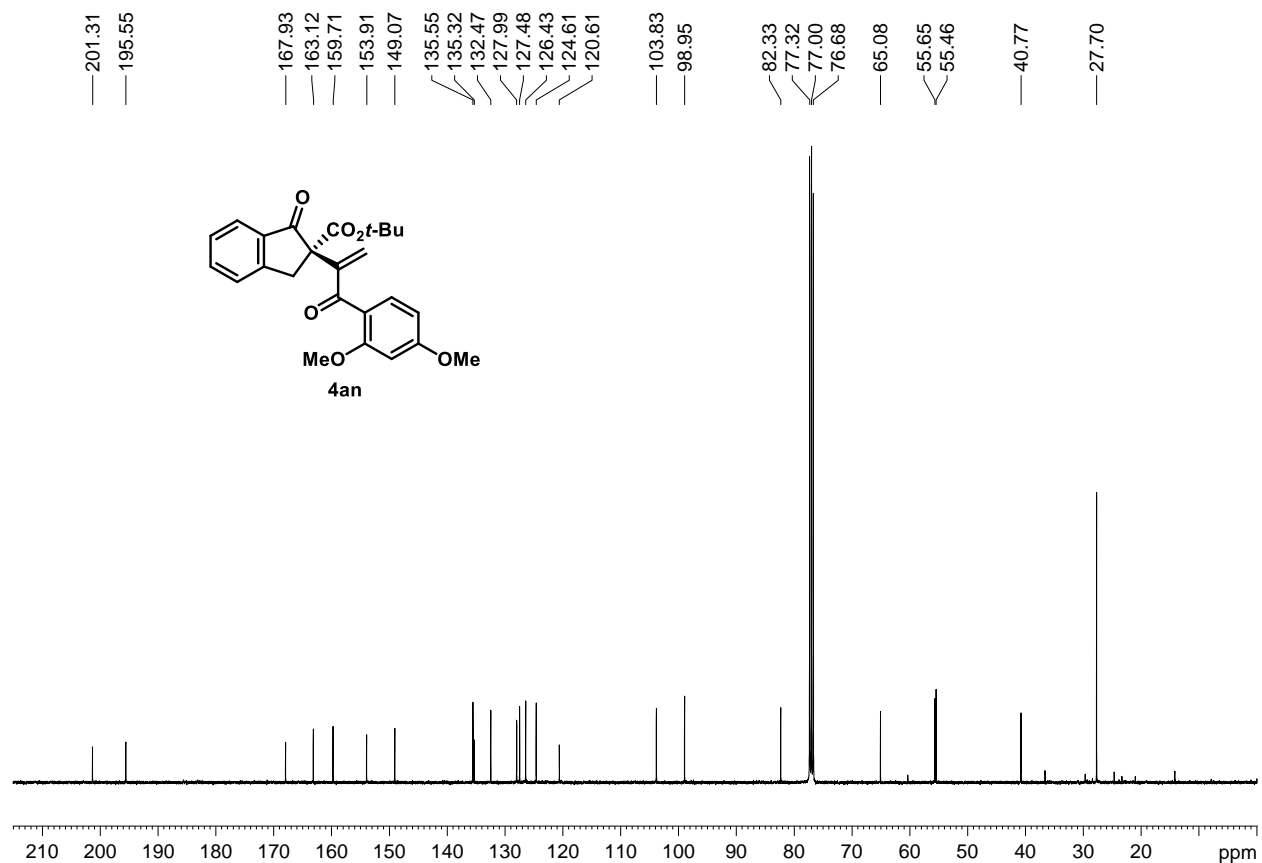

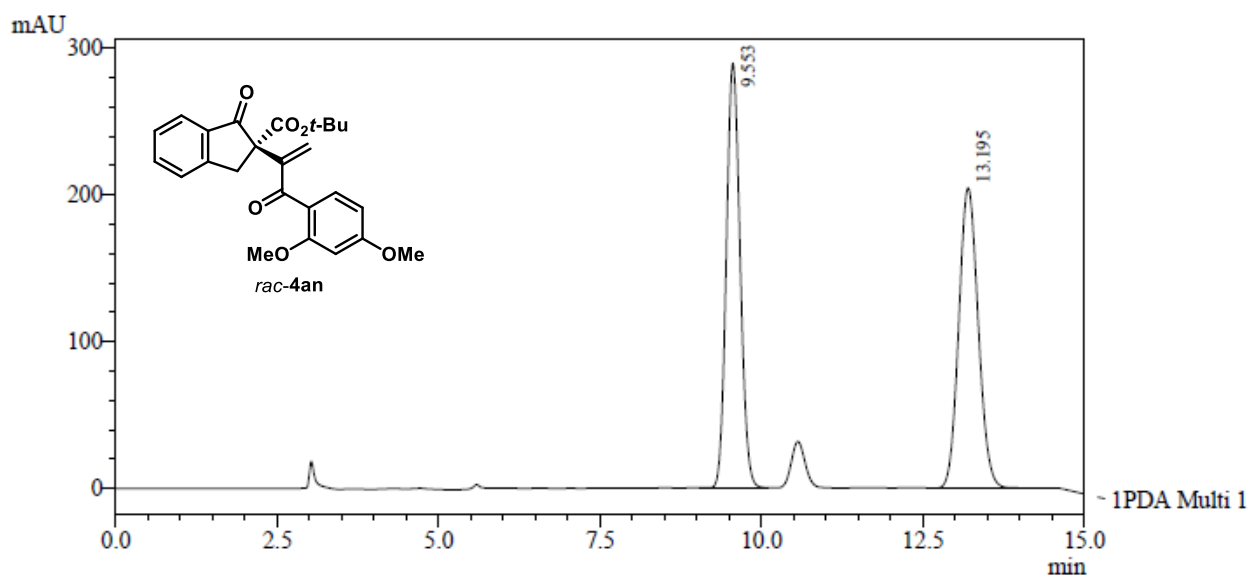

1 PDA Multi 1 / 254nm 4nm

PeakTable

PDA Ch1 254nm 4nm

| Peak# | Ret. Time | Area    | Area %  |
|-------|-----------|---------|---------|
| 1     | 9.553     | 4281621 | 50.004  |
| 2     | 13.195    | 4280856 | 49.996  |
| Total |           | 8562477 | 100.000 |

Phenomenex C-1 column (*n*-Hexane/EtOH = 95:5, 1.0 mL min<sup>-1</sup>, 20 °C, 254 nm)

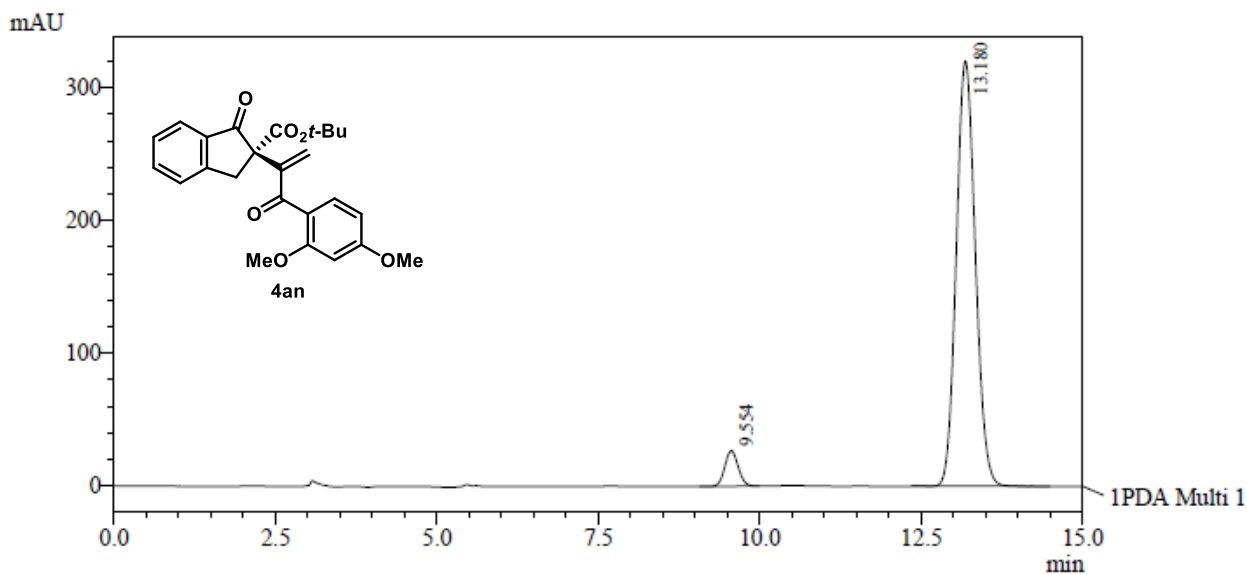

1 PDA Multi 1 / 254nm 4nm

PeakTable

PDA Ch1 254nm 4nm

| Peak# | Ret. Time | Area    | Area %  |
|-------|-----------|---------|---------|
| 1     | 9.554     | 382952  | 5.492   |
| 2     | 13.180    | 6589838 | 94.508  |
| Total |           | 6972790 | 100.000 |

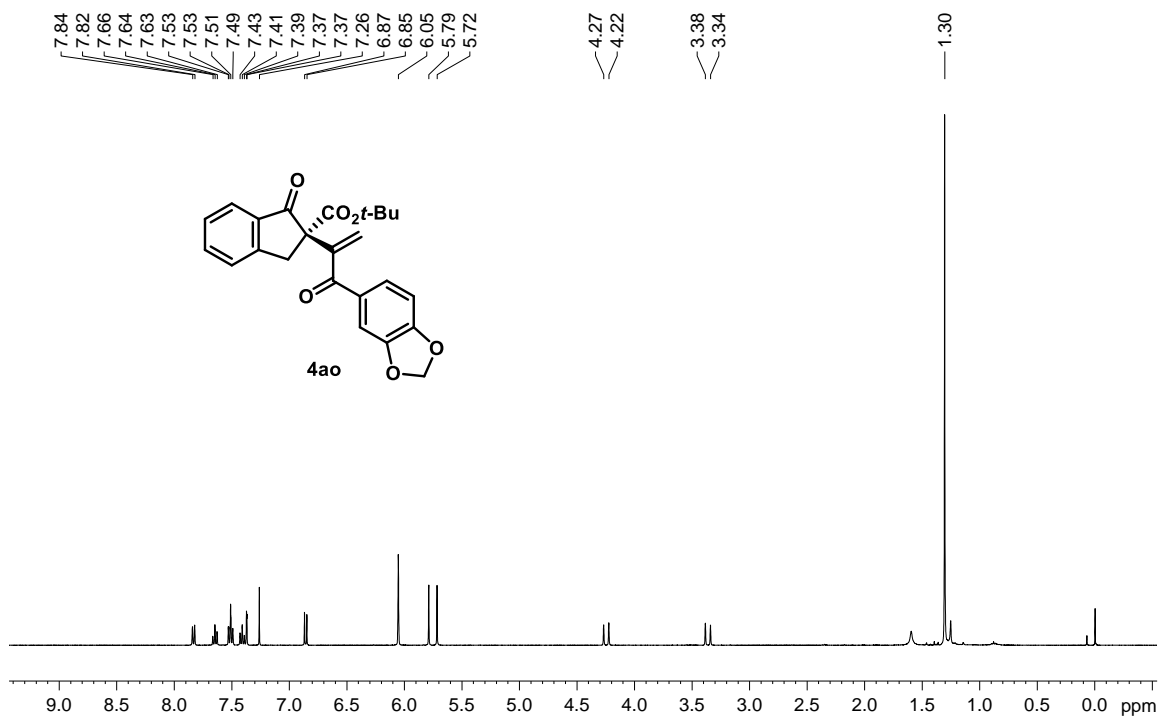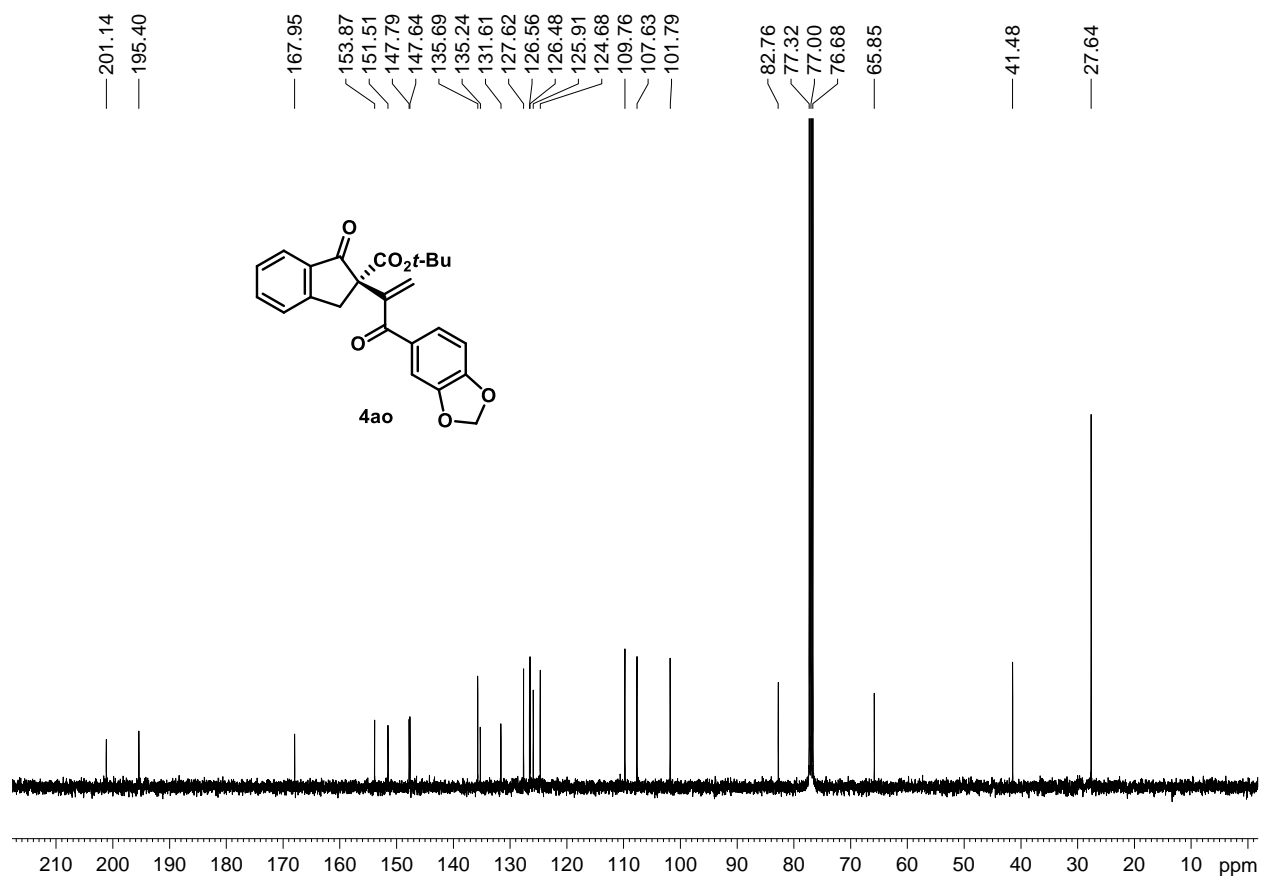

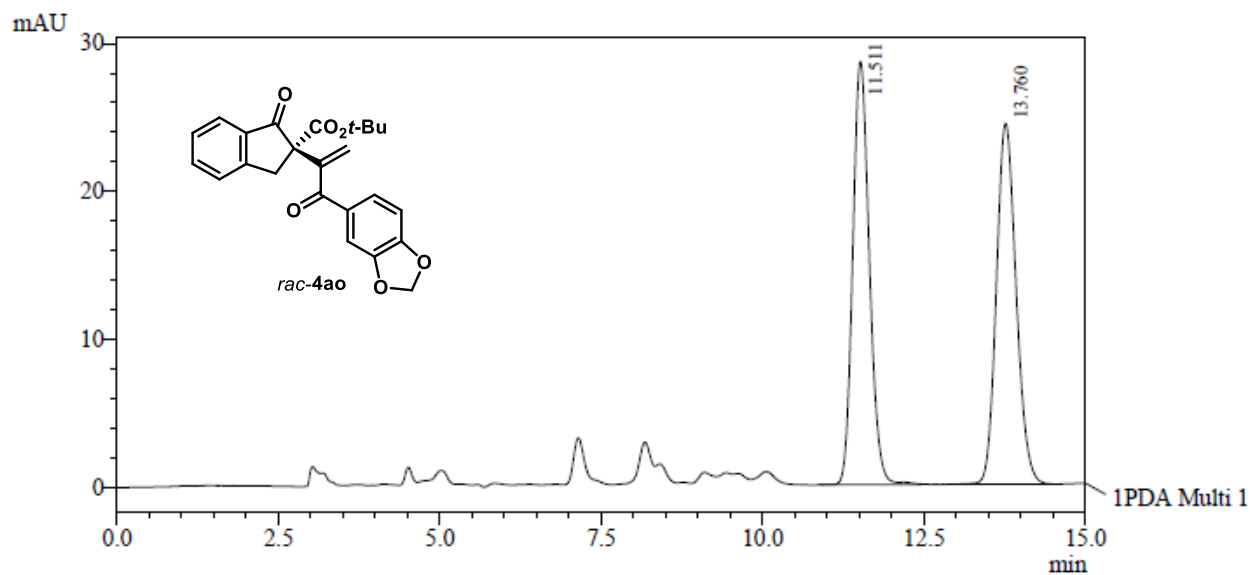

1 PDA Multi 1 / 254nm 4nm

PeakTable

PDA Ch1 254nm 4nm

| Peak# | Ret. Time | Area    | Area %  |
|-------|-----------|---------|---------|
| 1     | 11.511    | 510522  | 49.588  |
| 2     | 13.760    | 518998  | 50.412  |
| Total |           | 1029520 | 100.000 |

Daicel Chiralpak AD-H column (*n*-Hexane/IPA = 90:10, 1.0 mL min<sup>-1</sup>, 20 °C, 254 nm)

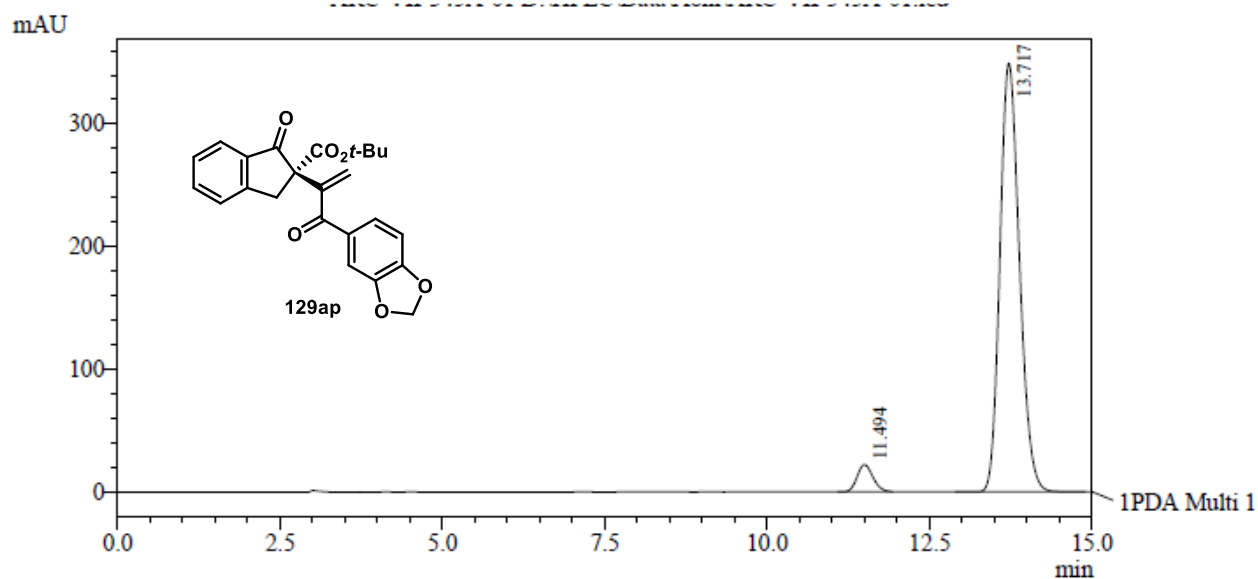

1 PDA Multi 1 / 254nm 4nm

PeakTable

PDA Ch1 254nm 4nm

| Peak# | Ret. Time | Area    | Area %  |
|-------|-----------|---------|---------|
| 1     | 11.494    | 373385  | 4.858   |
| 2     | 13.717    | 7311850 | 95.142  |
| Total |           | 7685236 | 100.000 |

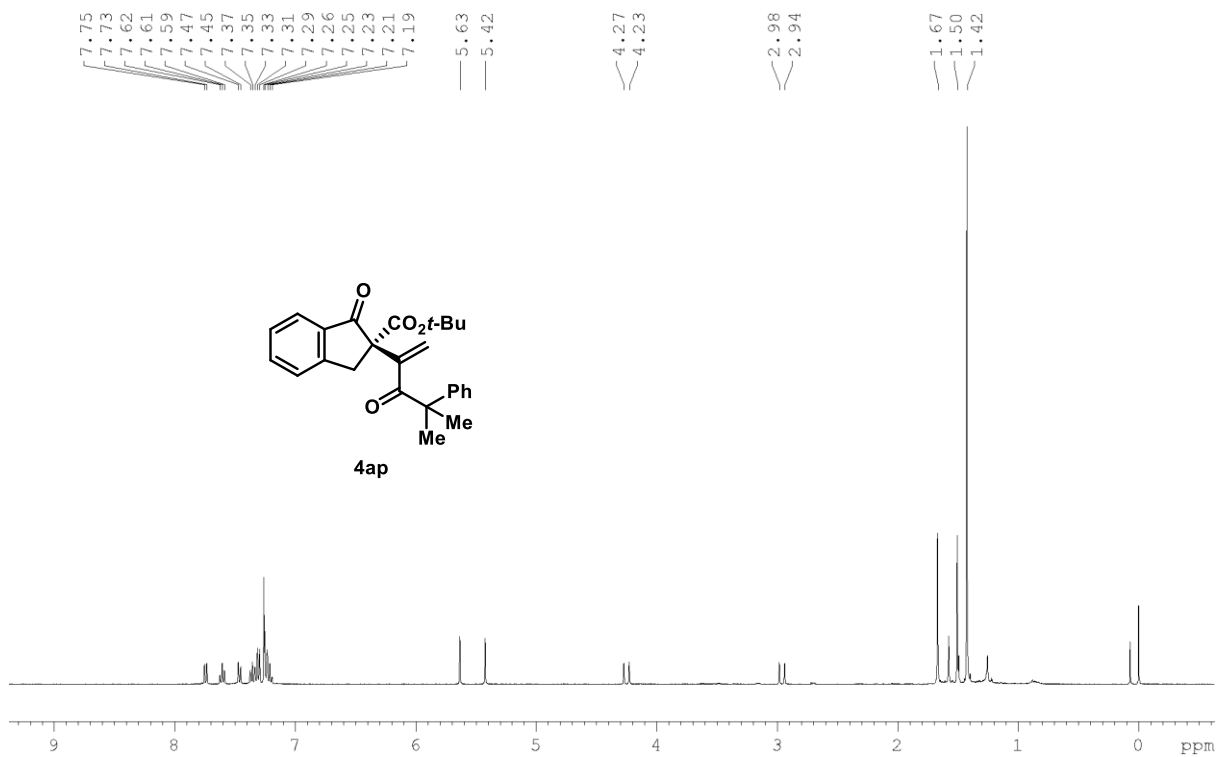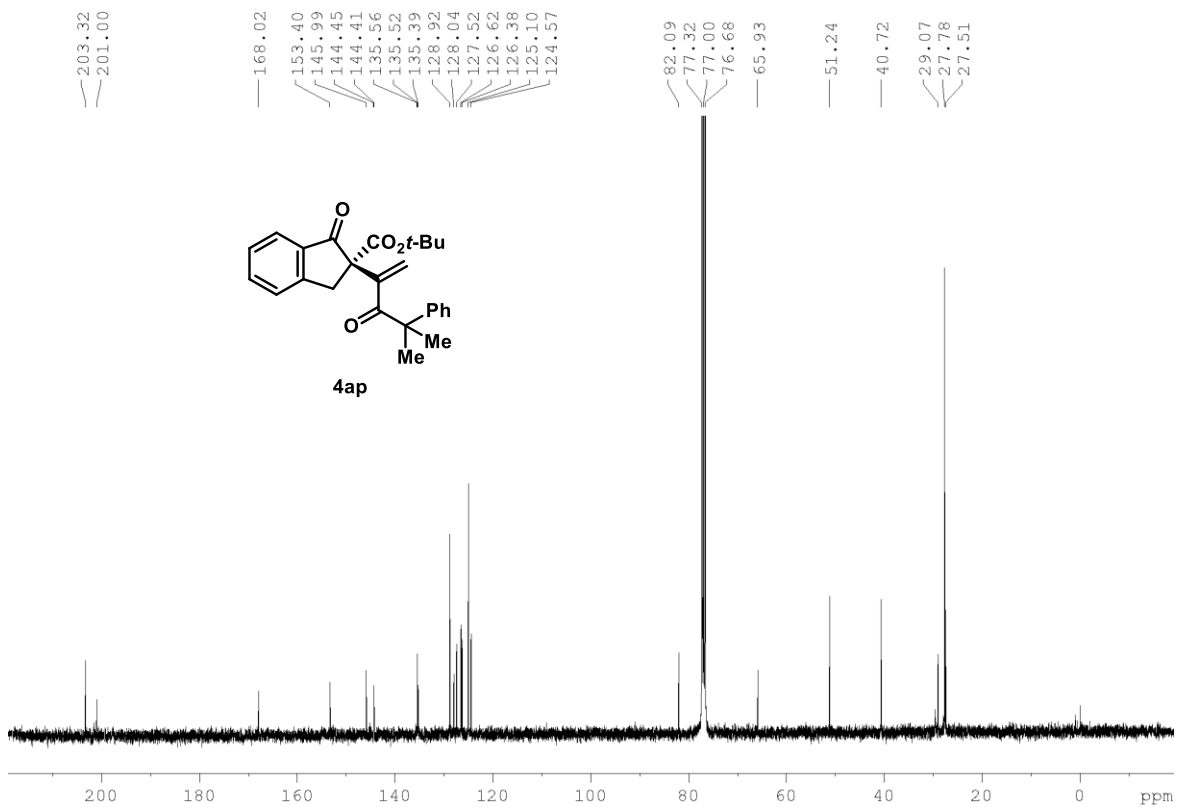



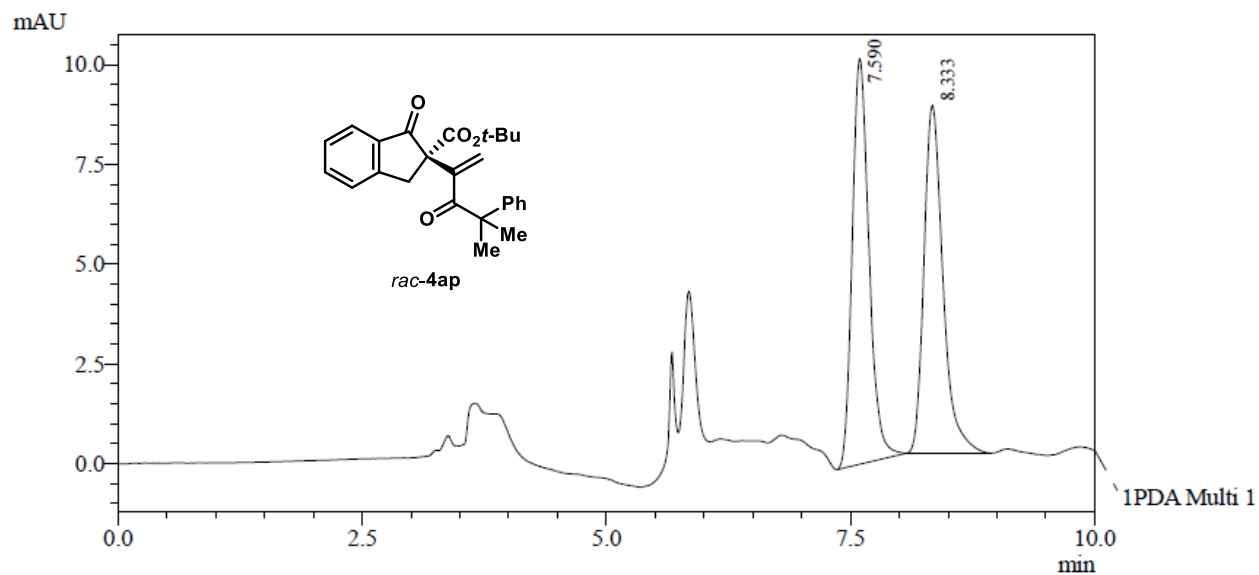

1 PDA Multi 1 / 254nm 4nm

PeakTable

PDA Ch1 254nm 4nm

| Peak# | Ret. Time | Area   | Area %  |
|-------|-----------|--------|---------|
| 1     | 7.590     | 121248 | 50.658  |
| 2     | 8.333     | 118097 | 49.342  |
| Total |           | 239346 | 100.000 |

Daicel Chiralpak IE column (*n*-Hexane/EtOH = 95:5, 1.0 mL min<sup>-1</sup>, 20 °C, 254 nm)

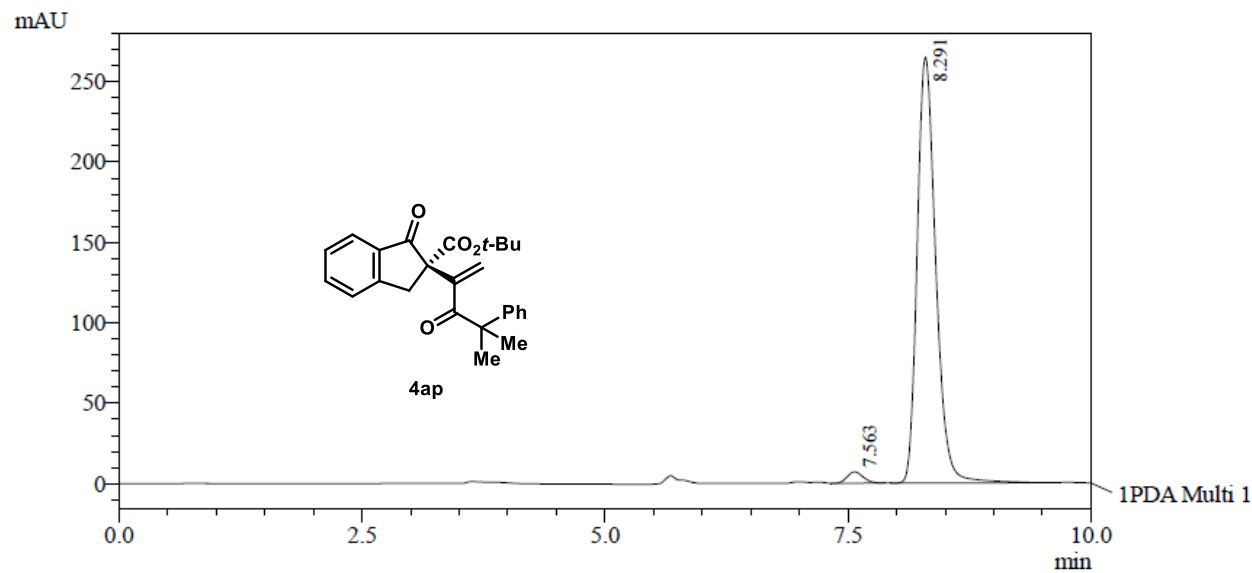

1 PDA Multi 1 / 254nm 4nm

PeakTable

PDA Ch1 254nm 4nm

| Peak# | Ret. Time | Area    | Area %  |
|-------|-----------|---------|---------|
| 1     | 7.563     | 80982   | 2.250   |
| 2     | 8.291     | 3517655 | 97.750  |
| Total |           | 3598636 | 100.000 |

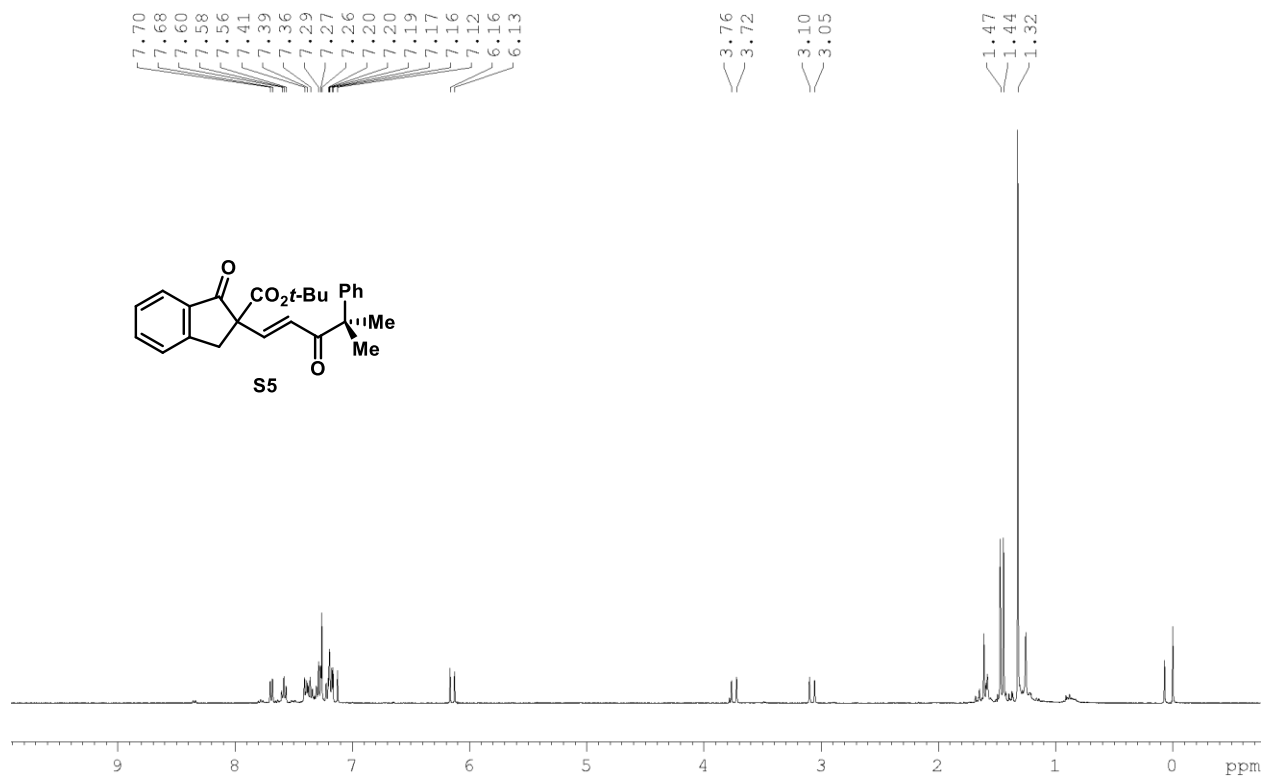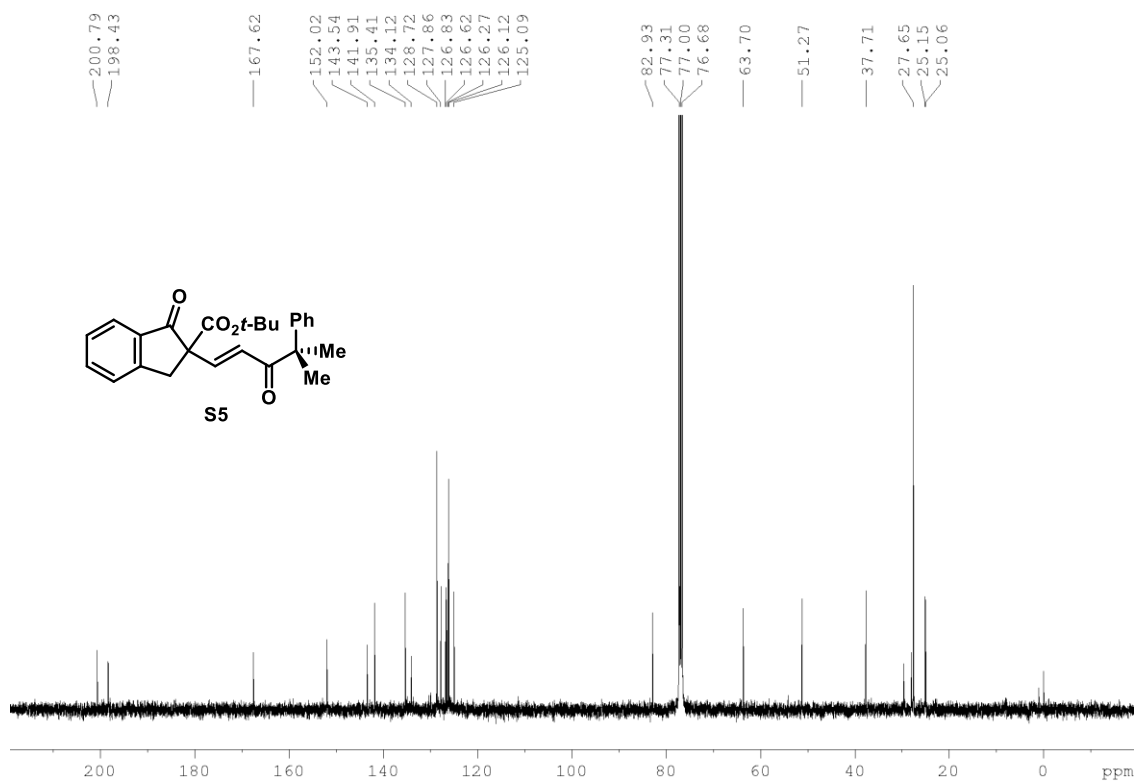

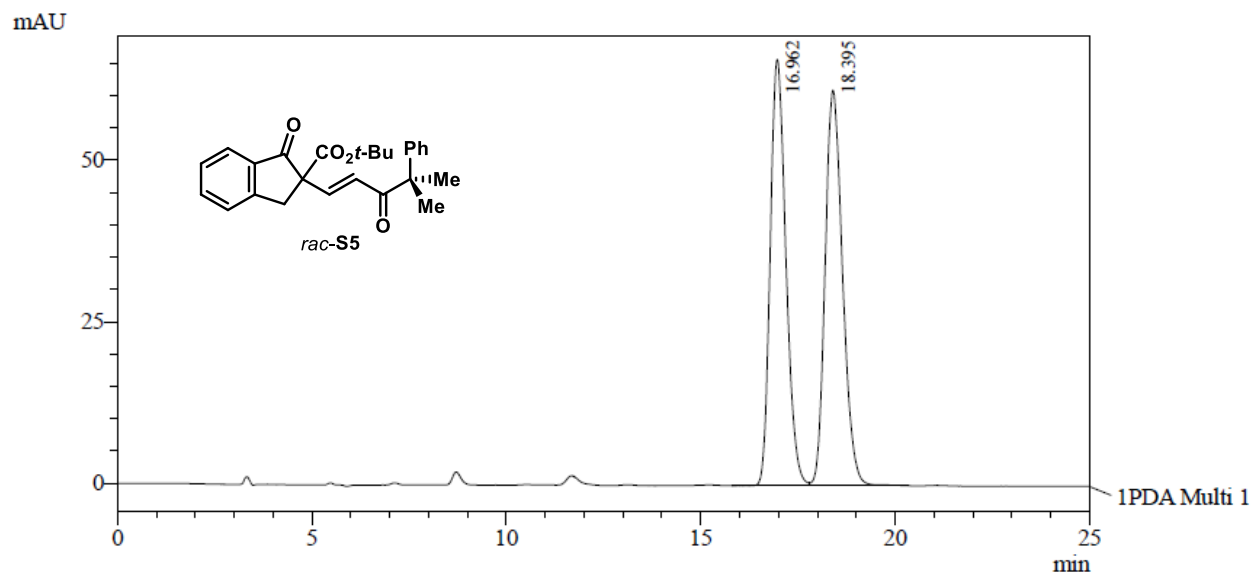

1 PDA Multi 1 / 254nm 4nm

PeakTable

PDA Ch1 254nm 4nm

| Peak# | Ret. Time | Area    | Area %  |
|-------|-----------|---------|---------|
| 1     | 16.962    | 1851722 | 49.150  |
| 2     | 18.395    | 1915808 | 50.850  |
| Total |           | 3767530 | 100.000 |

Daicel Chiralpak IE column (*n*-Hexane/IPA = 90:10, 1.0 mL min<sup>-1</sup>, 20 °C, 254 nm)

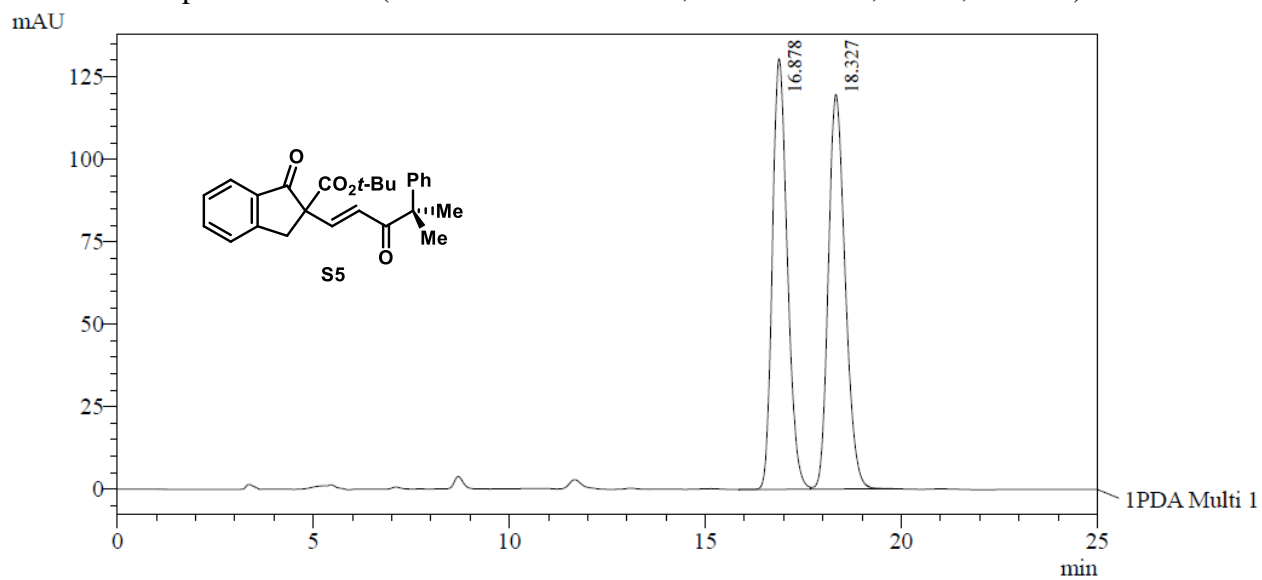

1 PDA Multi 1 / 254nm 4nm

PeakTable

PDA Ch1 254nm 4nm

| Peak# | Ret. Time | Area    | Area %  |
|-------|-----------|---------|---------|
| 1     | 16.878    | 3470845 | 49.229  |
| 2     | 18.327    | 3579552 | 50.771  |
| Total |           | 7050398 | 100.000 |

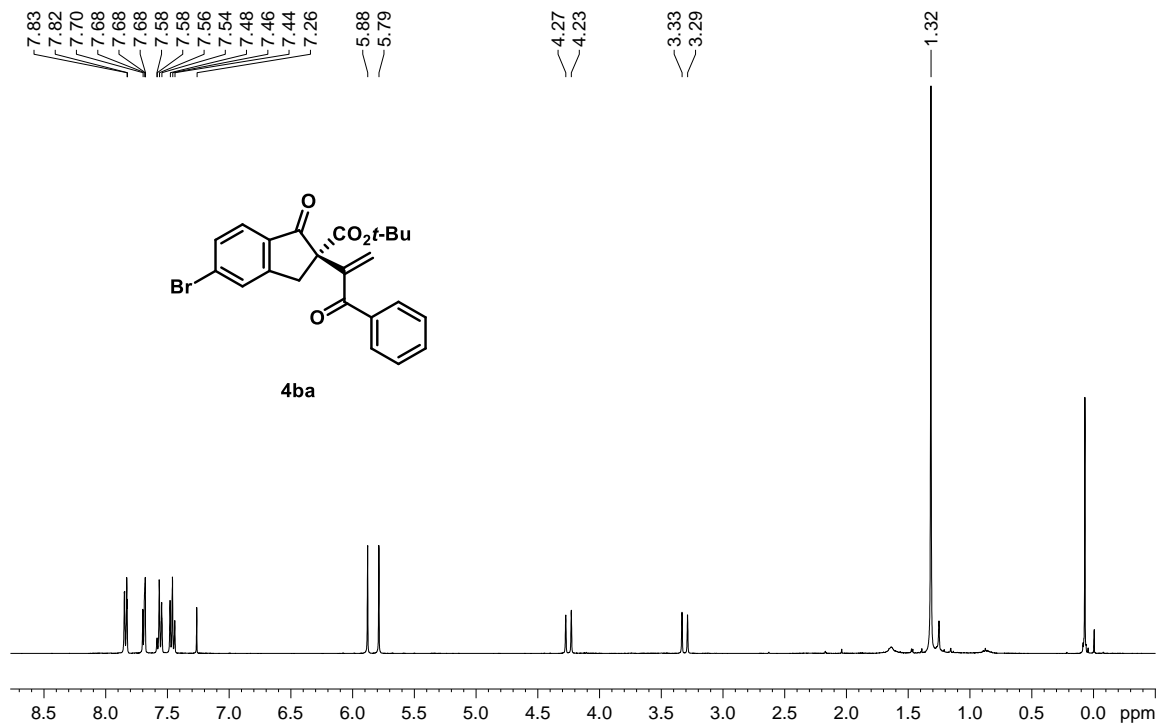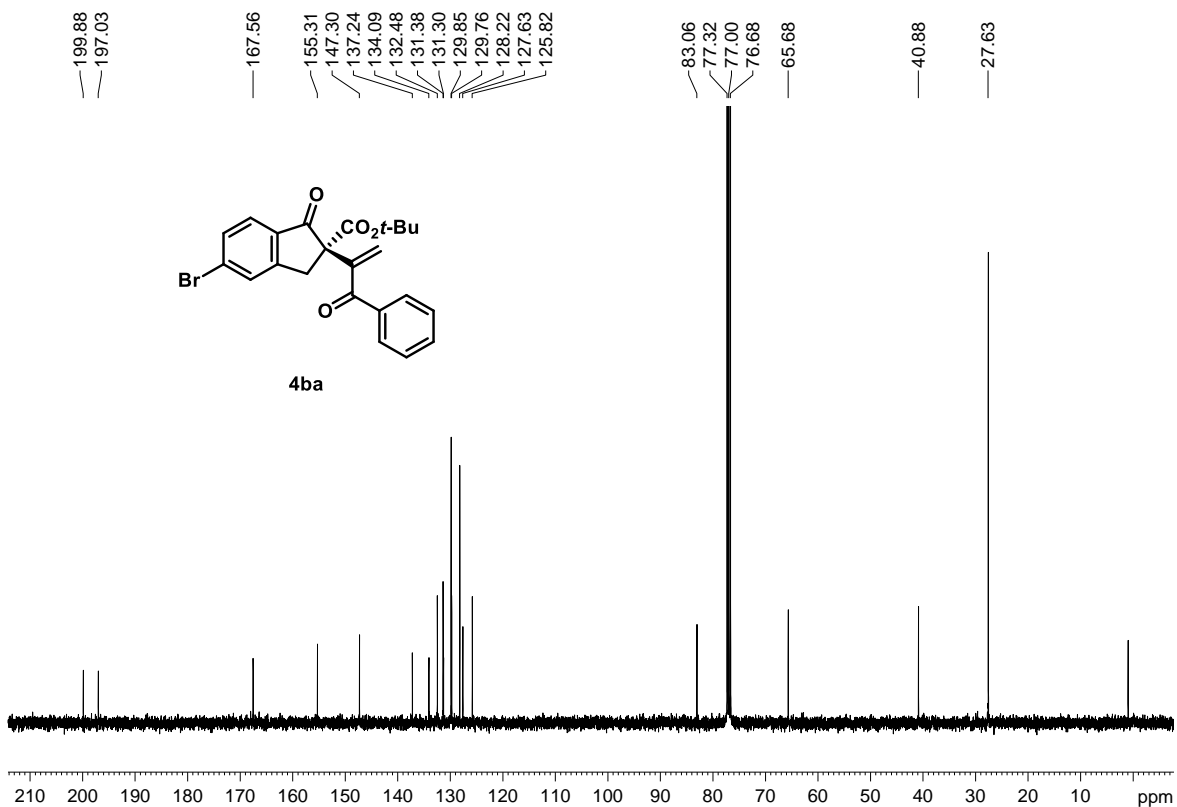

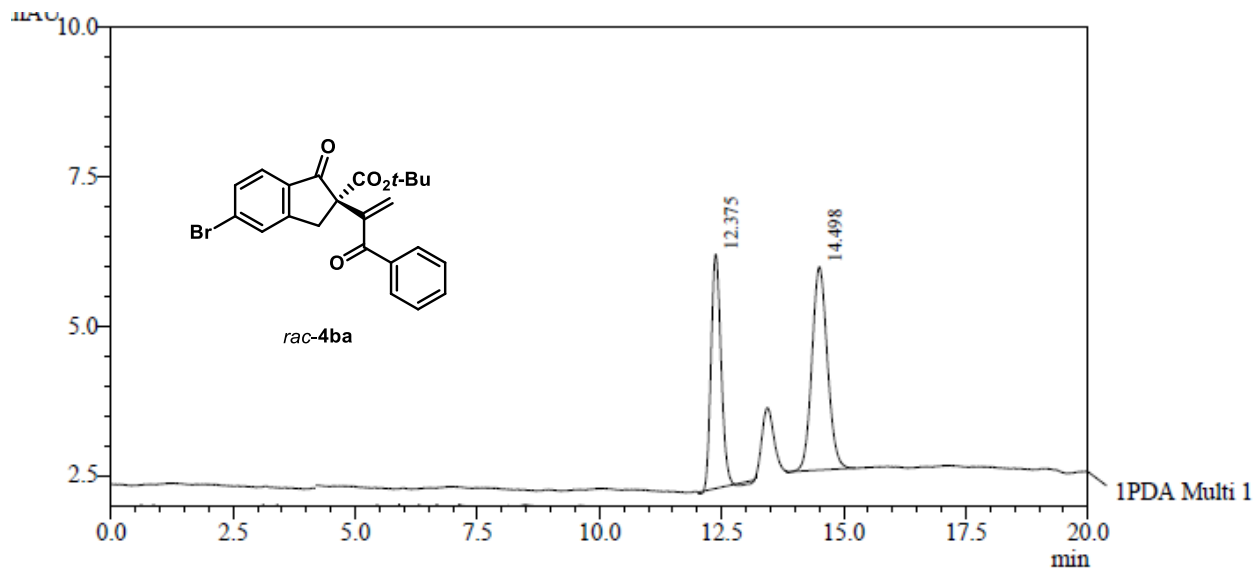

1 PDA Multi 1 / 254nm 4nm

PeakTable

PDA Ch1 254nm 4nm

| Peak# | Ret. Time | Area   | Area %  |
|-------|-----------|--------|---------|
| 1     | 12.375    | 75403  | 50.113  |
| 2     | 14.498    | 75063  | 49.887  |
| Total |           | 150466 | 100.000 |

Daicel Chiralpak AD-H column (*n*-Hexane/EtOH = 95:5, 1.0 mL min<sup>-1</sup>, 20 °C, 254 nm)

mAU

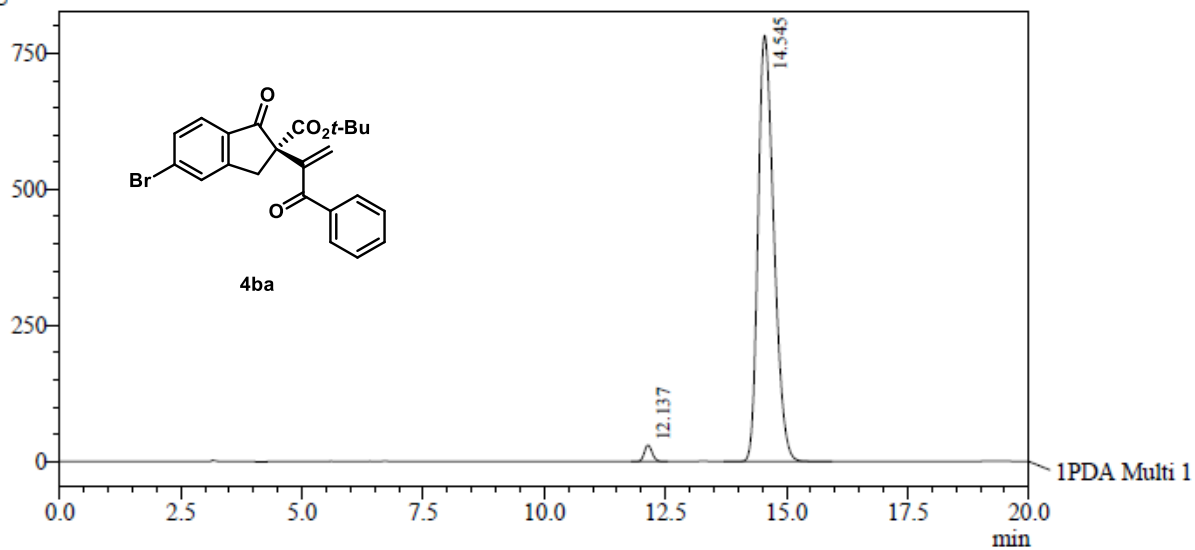

1 PDA Multi 1 / 254nm 4nm

PeakTable

PDA Ch1 254nm 4nm

| Peak# | Ret. Time | Area     | Area %  |
|-------|-----------|----------|---------|
| 1     | 12.137    | 341963   | 1.882   |
| 2     | 14.545    | 17827076 | 98.118  |
| Total |           | 18169039 | 100.000 |

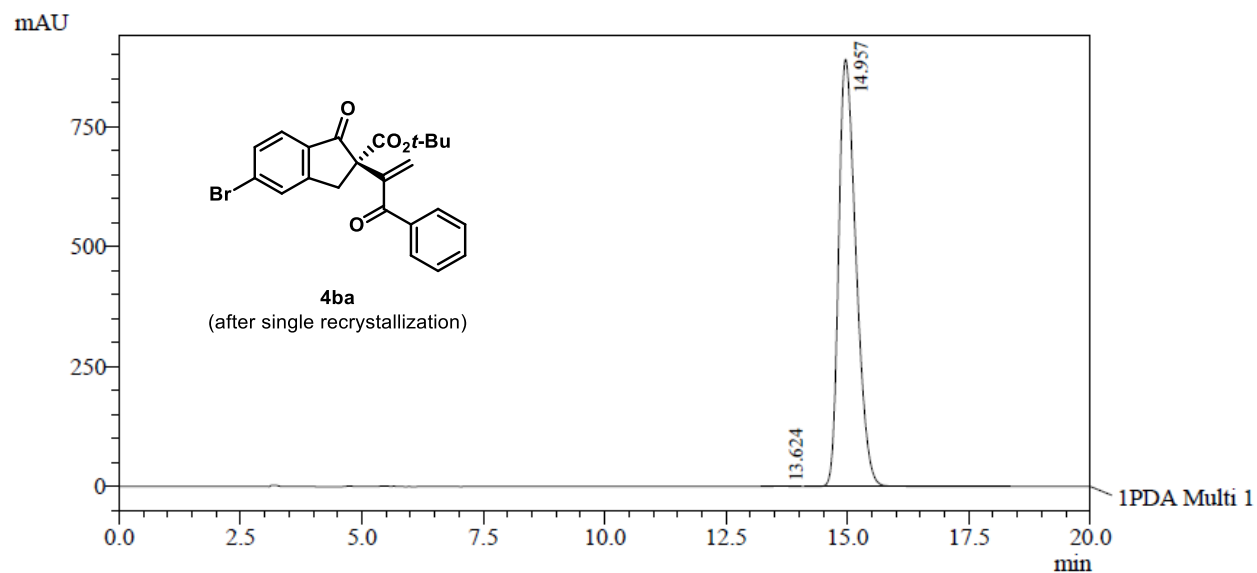

1 PDA Multi 1 / 254nm 4nm

PeakTable

PDA Ch1 254nm 4nm

| Peak# | Ret. Time | Area     | Area %  |
|-------|-----------|----------|---------|
| 1     | 13.624    | 17545    | 0.079   |
| 2     | 14.957    | 22132168 | 99.921  |
| Total |           | 22149713 | 100.000 |

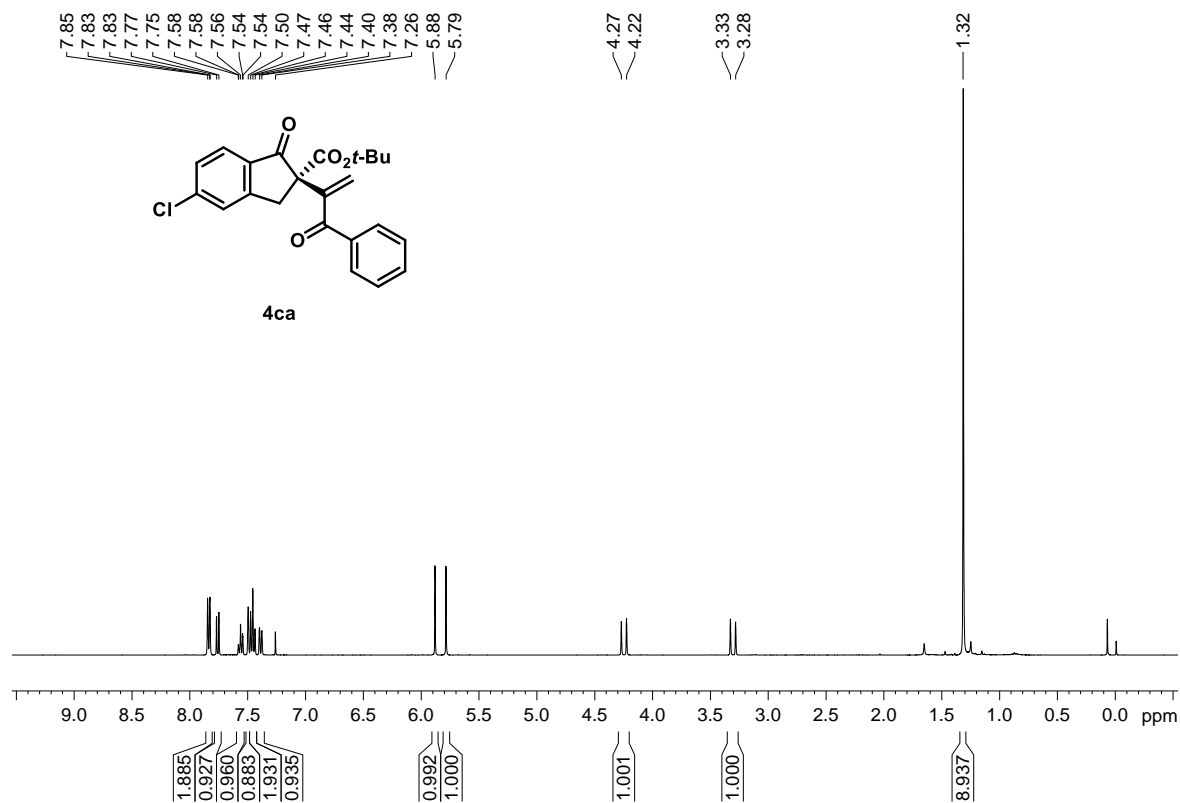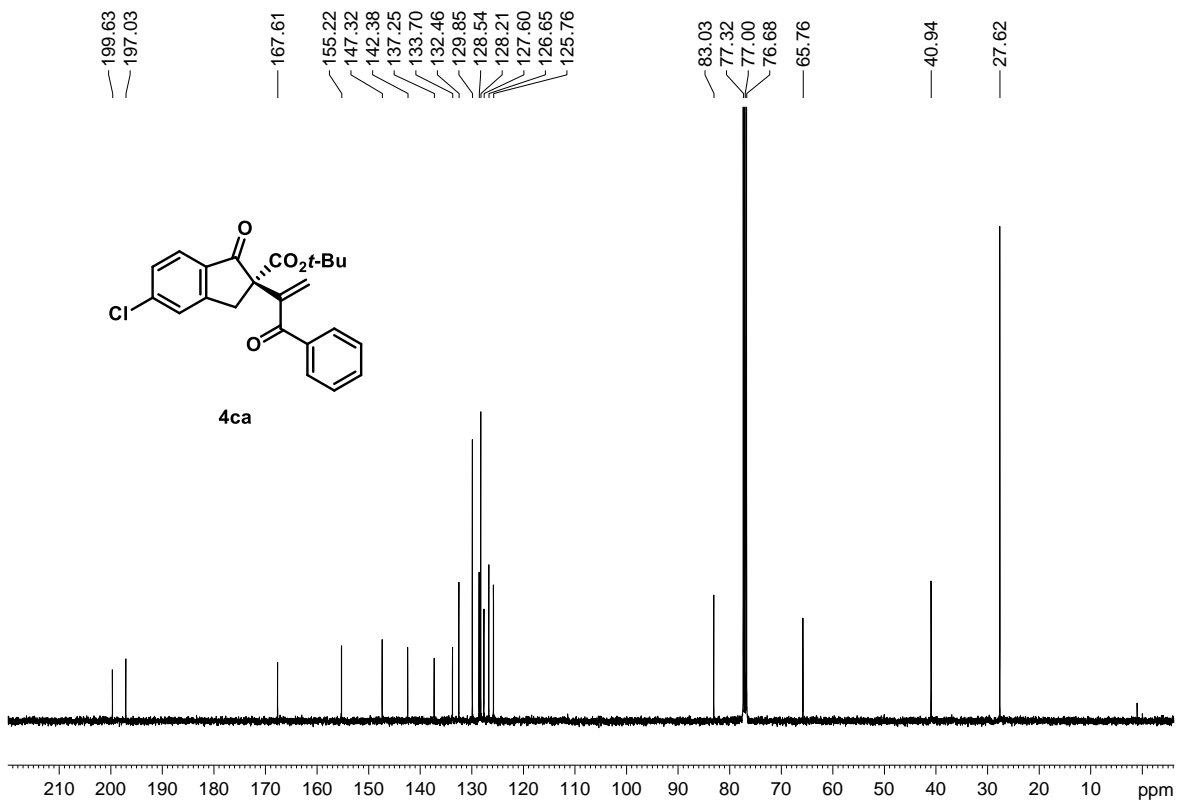

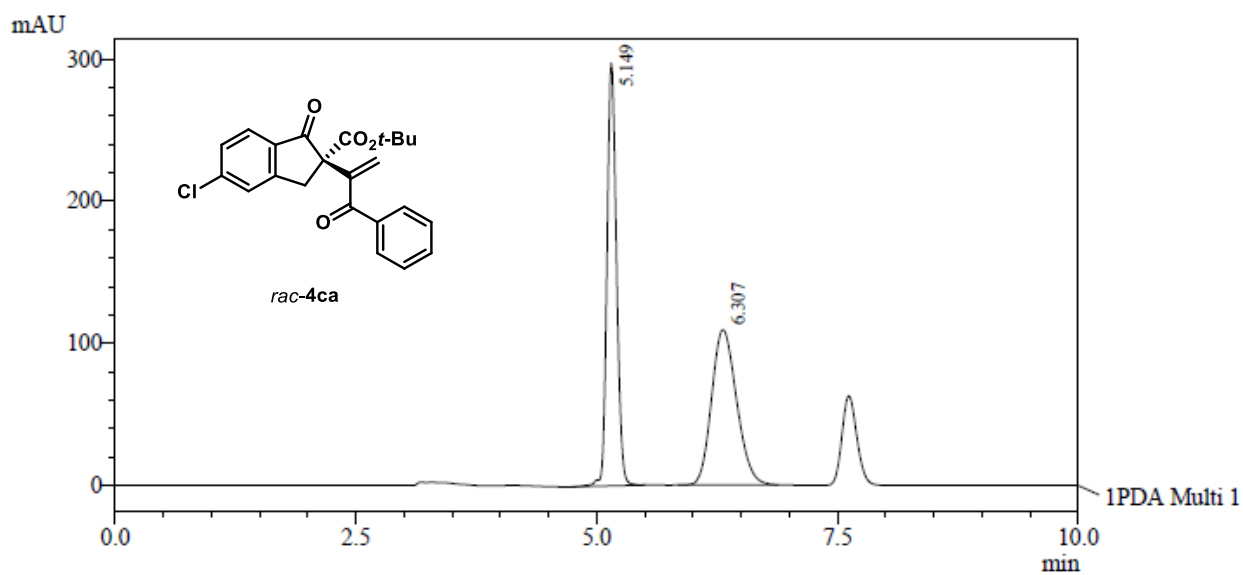

1 PDA Multi 1 / 254nm 4nm

PeakTable

PDA Ch1 254nm 4nm

| Peak# | Ret. Time | Area    | Area %  |
|-------|-----------|---------|---------|
| 1     | 5.149     | 2040003 | 50.811  |
| 2     | 6.307     | 1974901 | 49.189  |
| Total |           | 4014904 | 100.000 |

Daicel Chiralpak AS-H column (*n*-Hexane/EtOH = 95:5, 1.0 mL min<sup>-1</sup>, 20 °C, 254 nm)

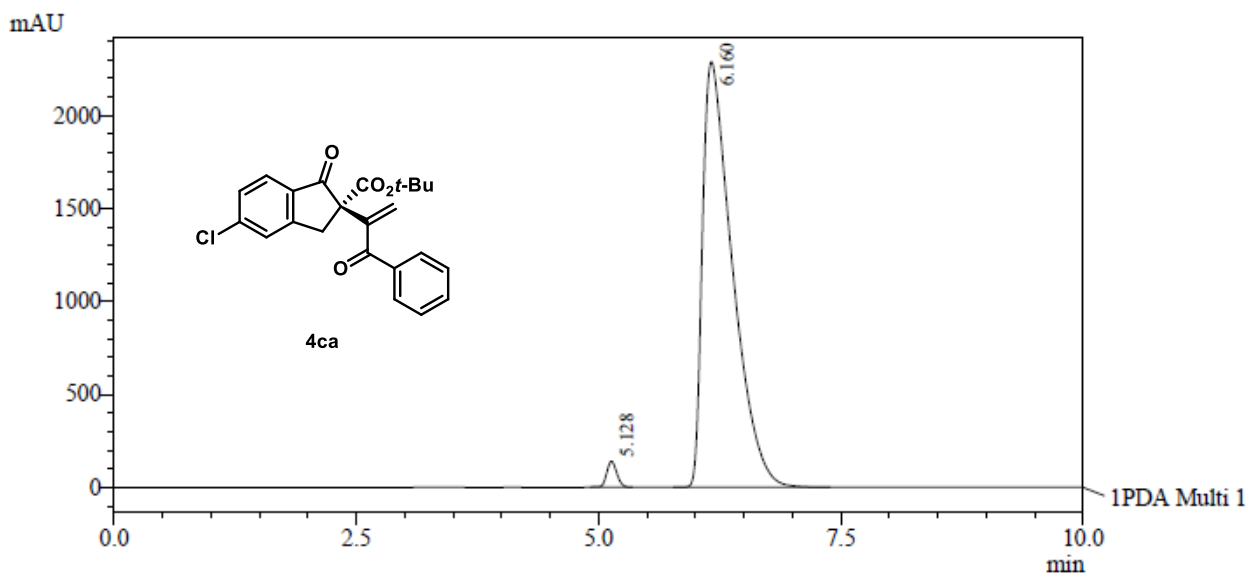

1 PDA Multi 1 / 254nm 4nm

PeakTable

PDA Ch1 254nm 4nm

| Peak# | Ret. Time | Area     | Area %  |
|-------|-----------|----------|---------|
| 1     | 5.128     | 1006629  | 2.006   |
| 2     | 6.160     | 49174146 | 97.994  |
| Total |           | 50180775 | 100.000 |



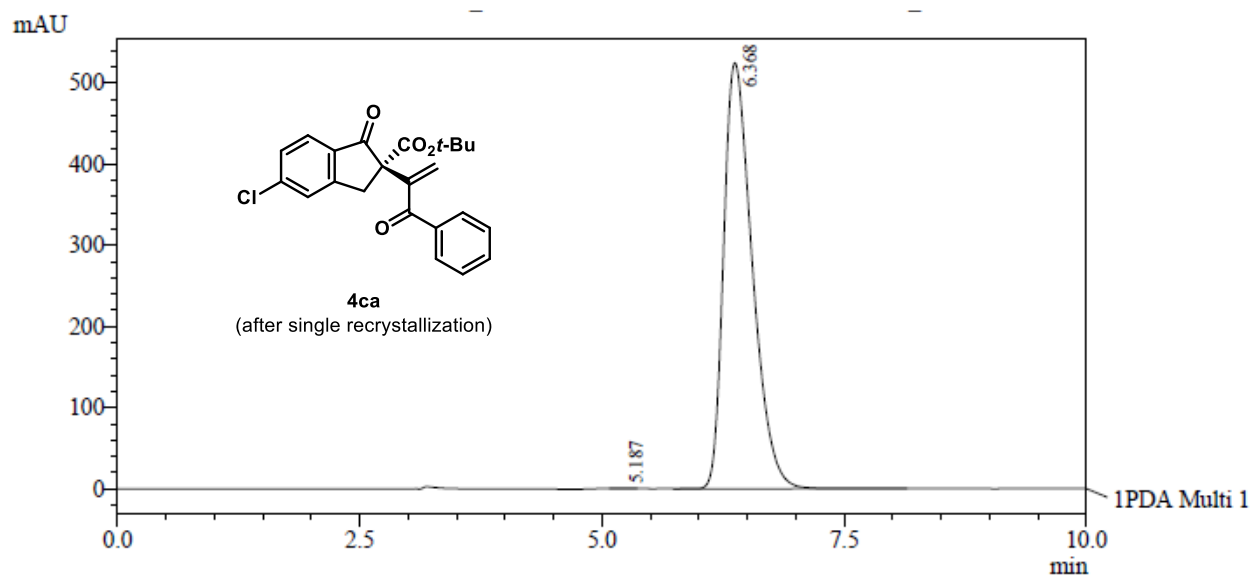

PeakTable

PDA Ch1 254nm 4nm

| Peak# | Ret. Time | Area     | Area %  |
|-------|-----------|----------|---------|
| 1     | 5.187     | 3023     | 0.028   |
| 2     | 6.368     | 10781915 | 99.972  |
| Total |           | 10784938 | 100.000 |

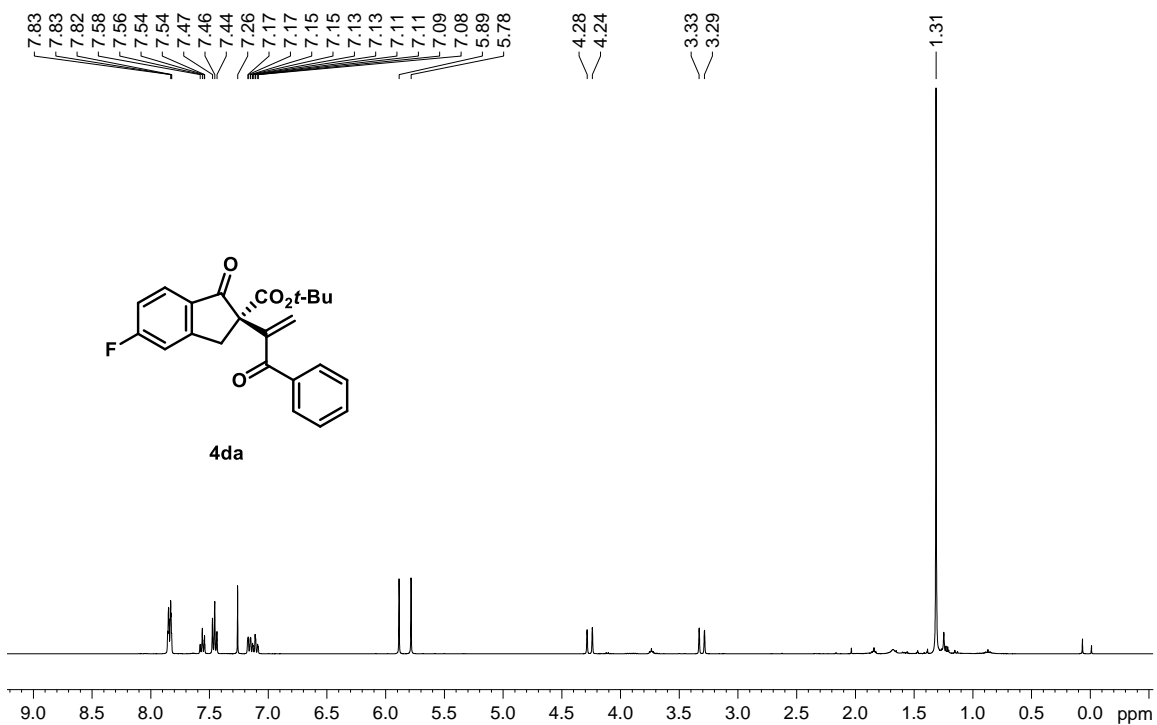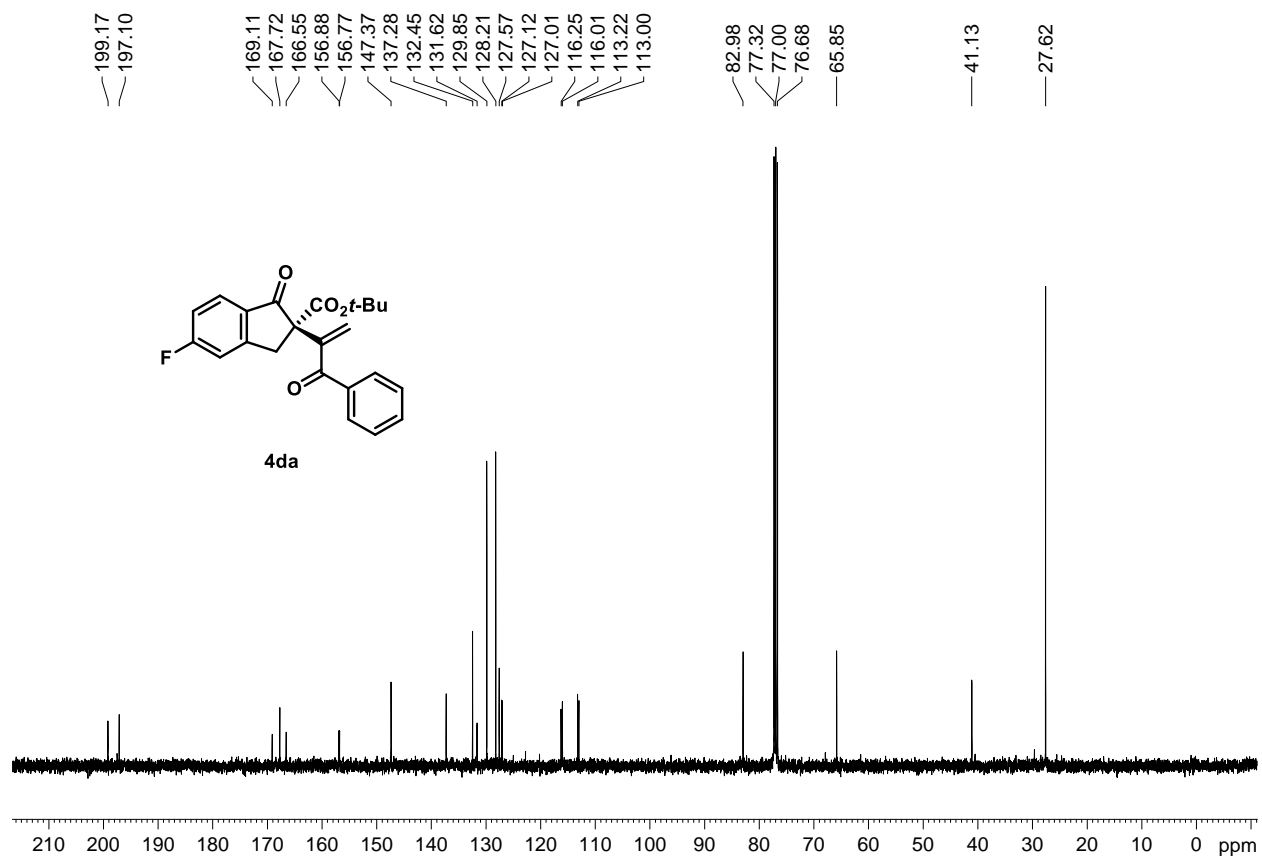

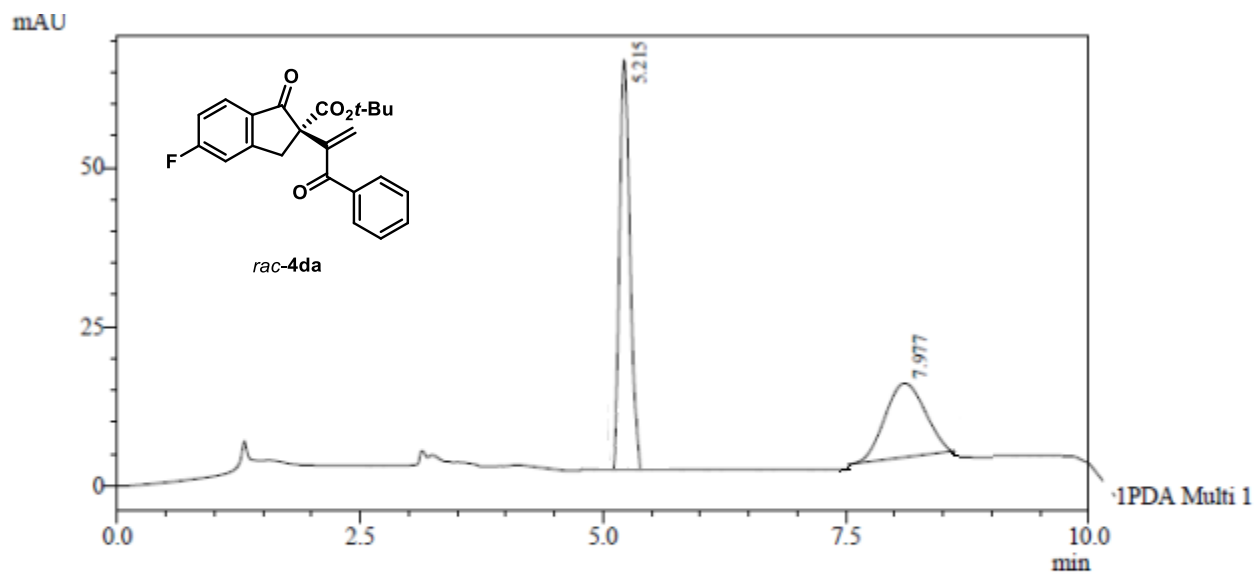

1 PDA Multi 1 / 254nm 4nm

PeakTable

PDA Ch1 254nm 4nm

| Peak# | Ret. Time | Area   | Area %  |
|-------|-----------|--------|---------|
| 1     | 5.215     | 370735 | 52.609  |
| 2     | 7.977     | 333961 | 47.391  |
| Total |           | 704696 | 100.000 |

Daicel Chiralpak AS-H column (*n*-Hexane/EtOH = 95:5, 1.0 mL min<sup>-1</sup>, 20 °C, 254 nm)

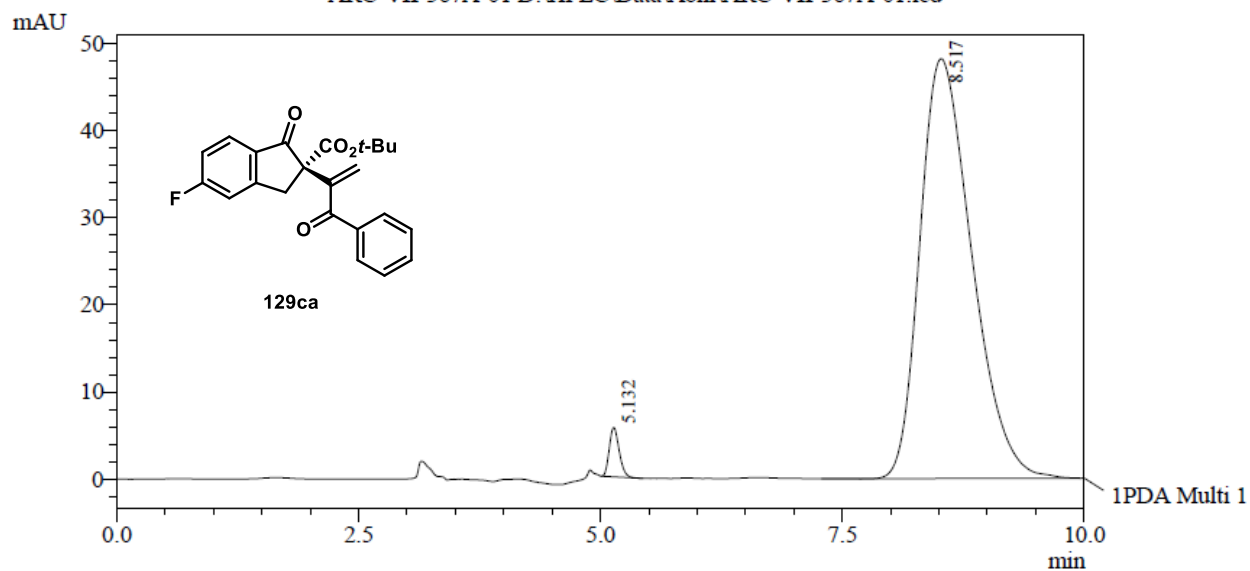

1 PDA Multi 1 / 254nm 4nm

PeakTable

PDA Ch1 254nm 4nm

| Peak# | Ret. Time | Area    | Area %  |
|-------|-----------|---------|---------|
| 1     | 5.132     | 40430   | 2.204   |
| 2     | 8.517     | 1794205 | 97.796  |
| Total |           | 1834635 | 100.000 |

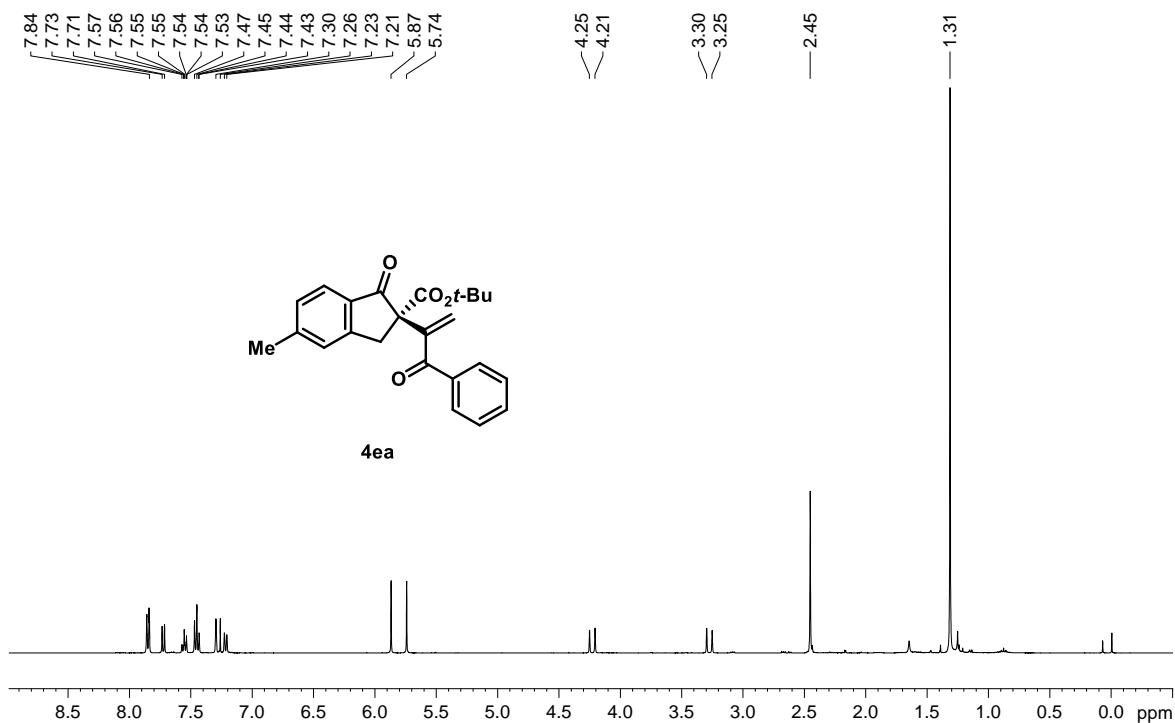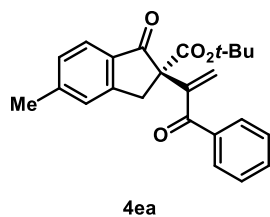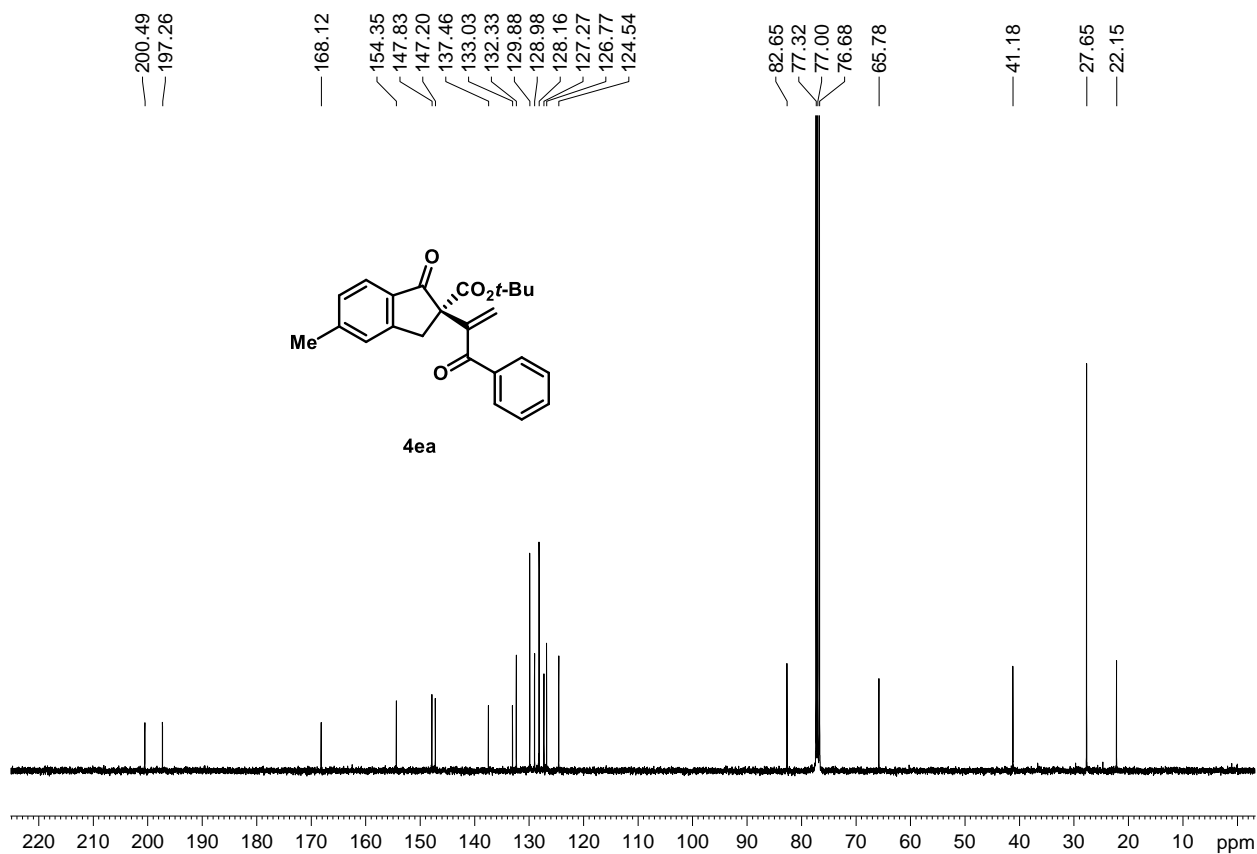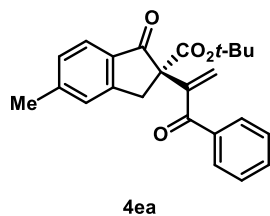

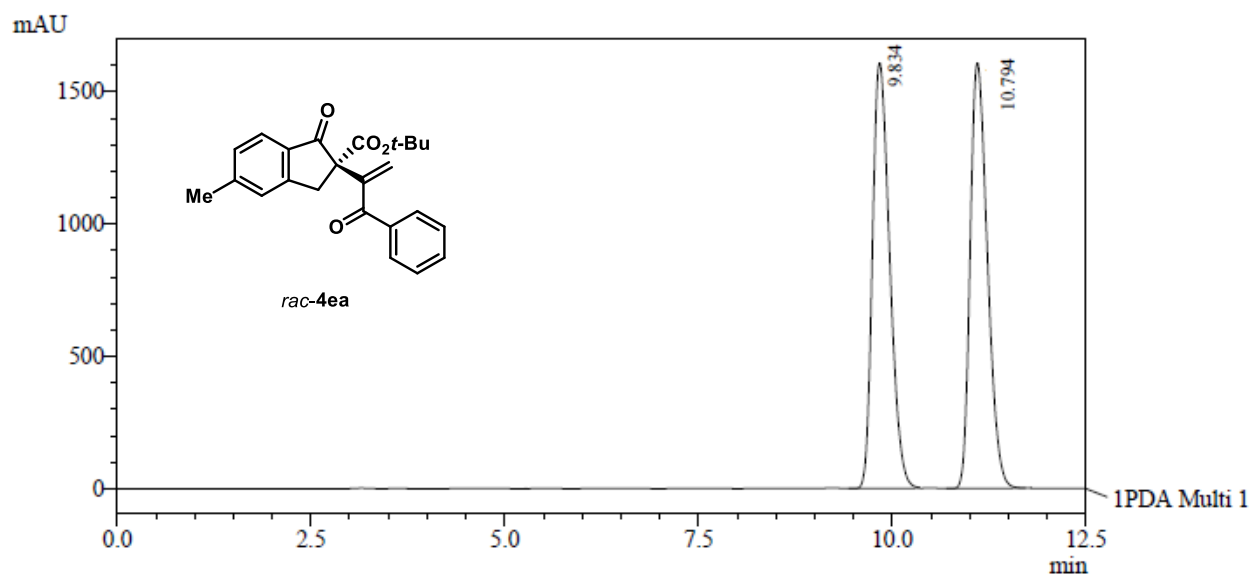

1 PDA Multi 1 / 254nm 4nm

PeakTable

PDA Ch1 254nm 4nm

| Peak# | Ret. Time | Area    | Area %  |
|-------|-----------|---------|---------|
| 1     | 9.834     | 1540045 | 50.911  |
| 2     | 10.794    | 1484926 | 49.089  |
| Total |           | 3024971 | 100.000 |

Daicel Chiralpak AD-H column (*n*-Hexane/EtOH = 95:5, 1.0 mL min<sup>-1</sup>, 20 °C, 254 nm)

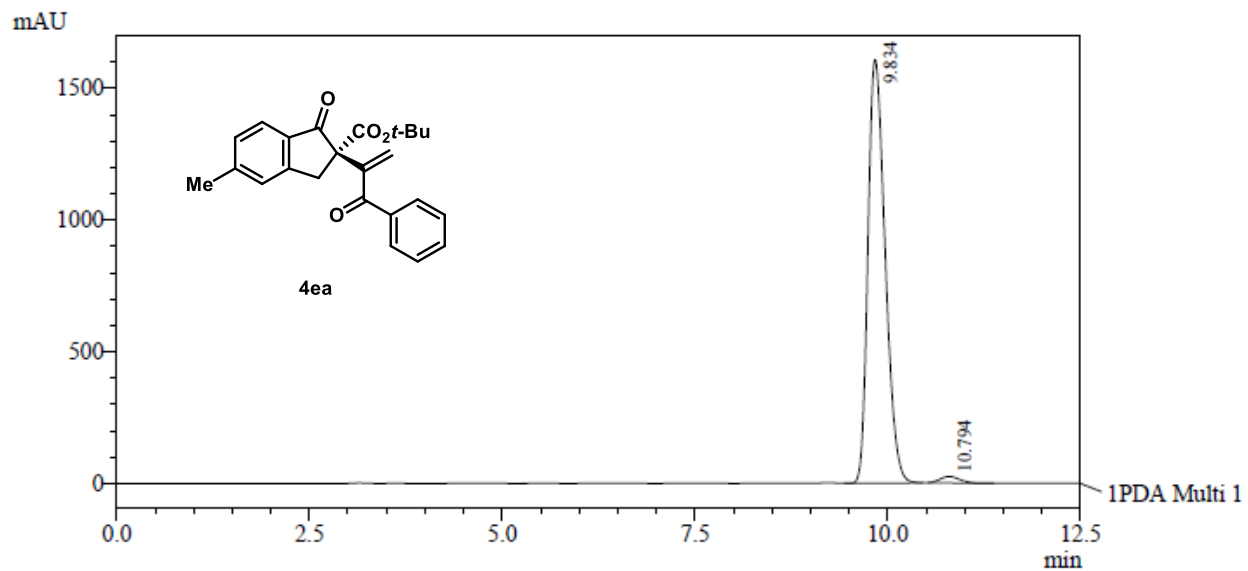

1 PDA Multi 1 / 254nm 4nm

PeakTable

PDA Ch1 254nm 4nm

| Peak# | Ret. Time | Area     | Area %  |
|-------|-----------|----------|---------|
| 1     | 9.834     | 24879281 | 98.306  |
| 2     | 10.794    | 428661   | 1.694   |
| Total |           | 25307942 | 100.000 |

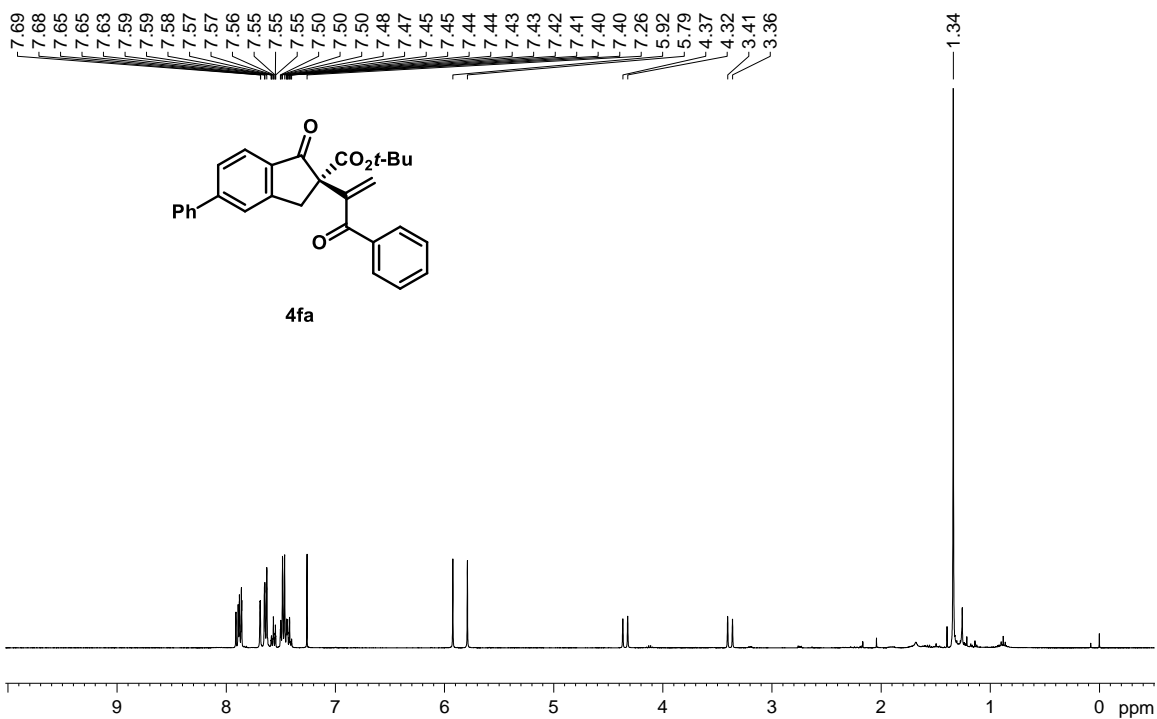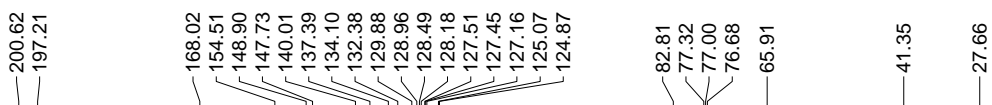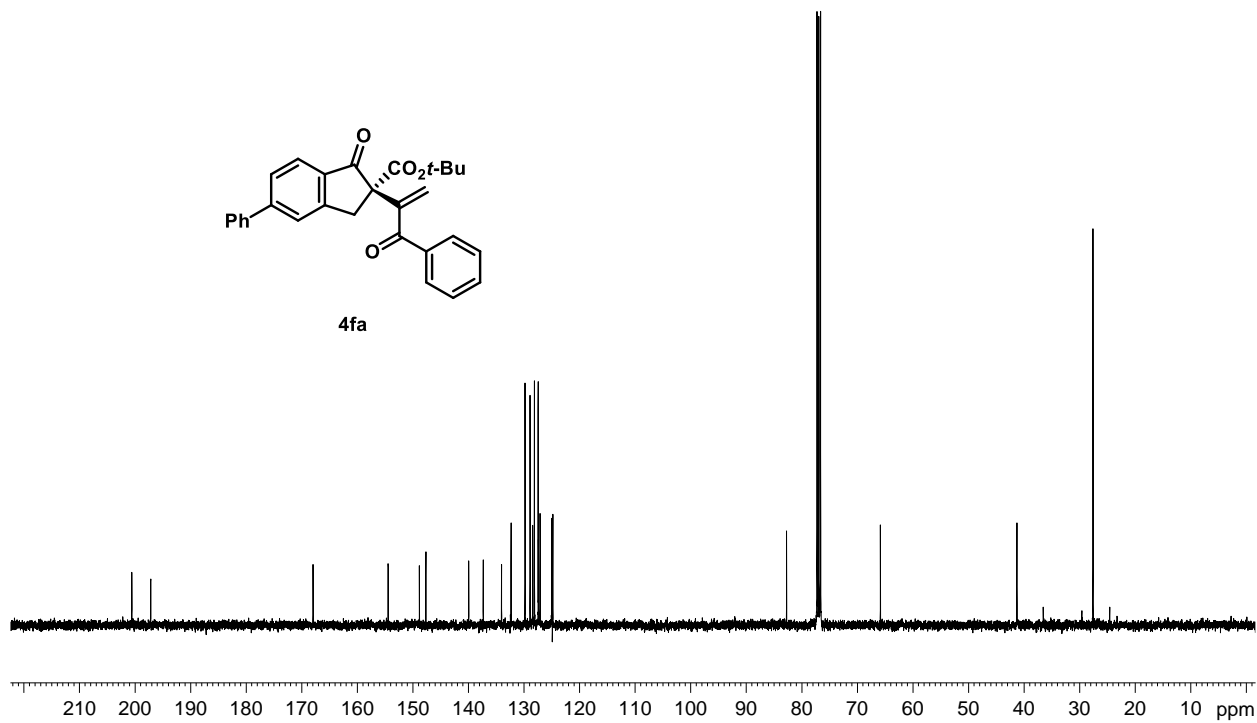

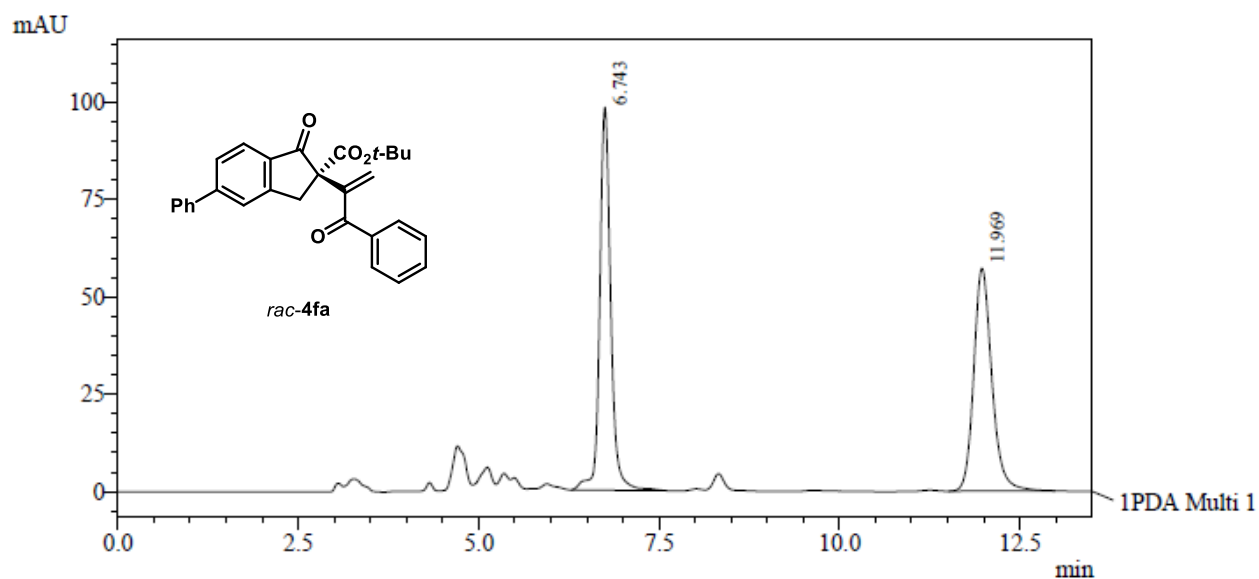

1 PDA Multi 1 / 254nm 4nm

PeakTable

PDA Ch1 254nm 4nm

| Peak# | Ret. Time | Area    | Area %  |
|-------|-----------|---------|---------|
| 1     | 6.743     | 1042853 | 51.017  |
| 2     | 11.969    | 1001294 | 48.983  |
| Total |           | 2044147 | 100.000 |

Daicel Chiralpak IB column (*n*-Hexane/IPA = 90:10, 1.0 mL min<sup>-1</sup>, 20 °C, 254 nm)

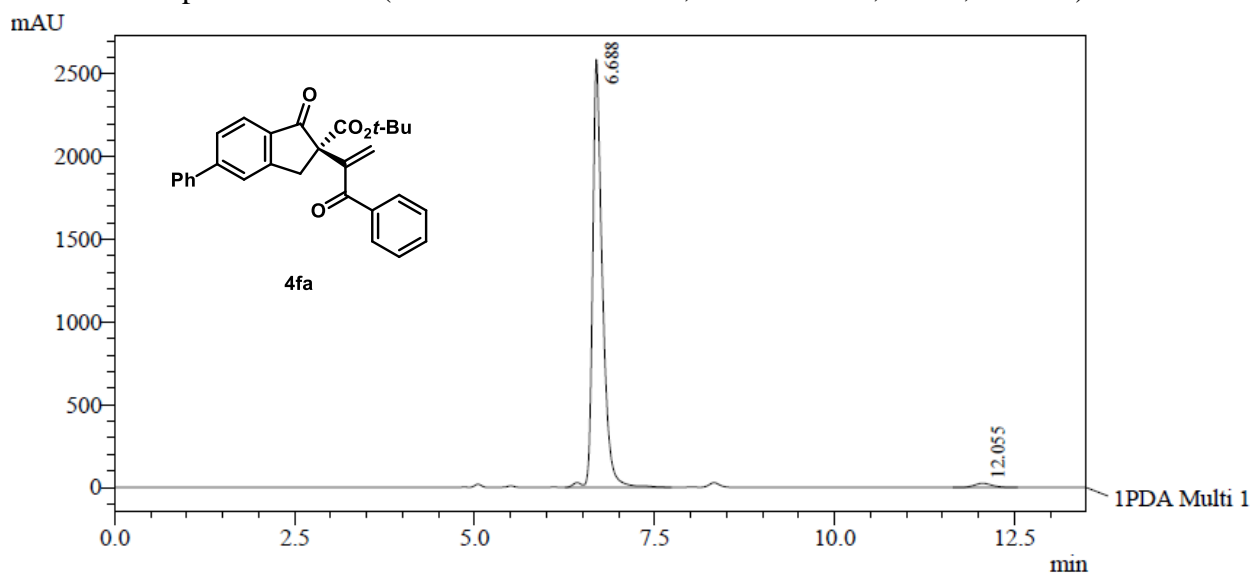

1 PDA Multi 1 / 254nm 4nm

PeakTable

PDA Ch1 254nm 4nm

| Peak# | Ret. Time | Area     | Area %  |
|-------|-----------|----------|---------|
| 1     | 6.688     | 24367322 | 98.252  |
| 2     | 12.055    | 433585   | 1.748   |
| Total |           | 24800907 | 100.000 |

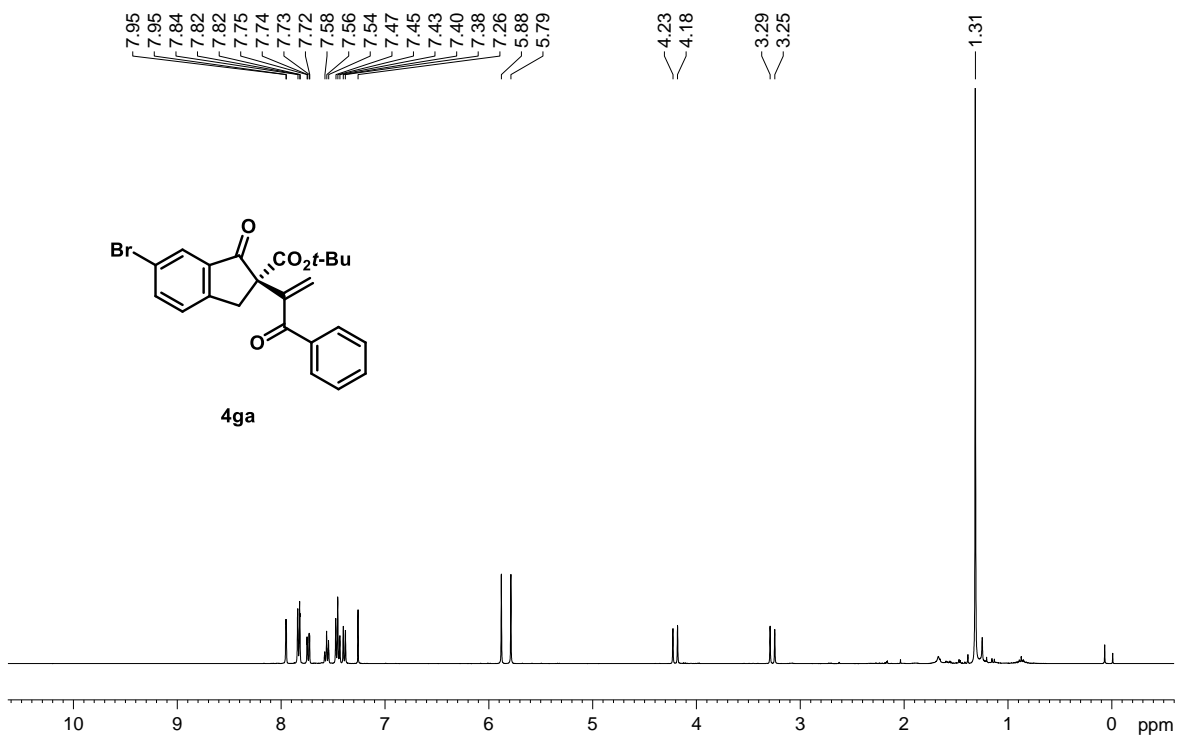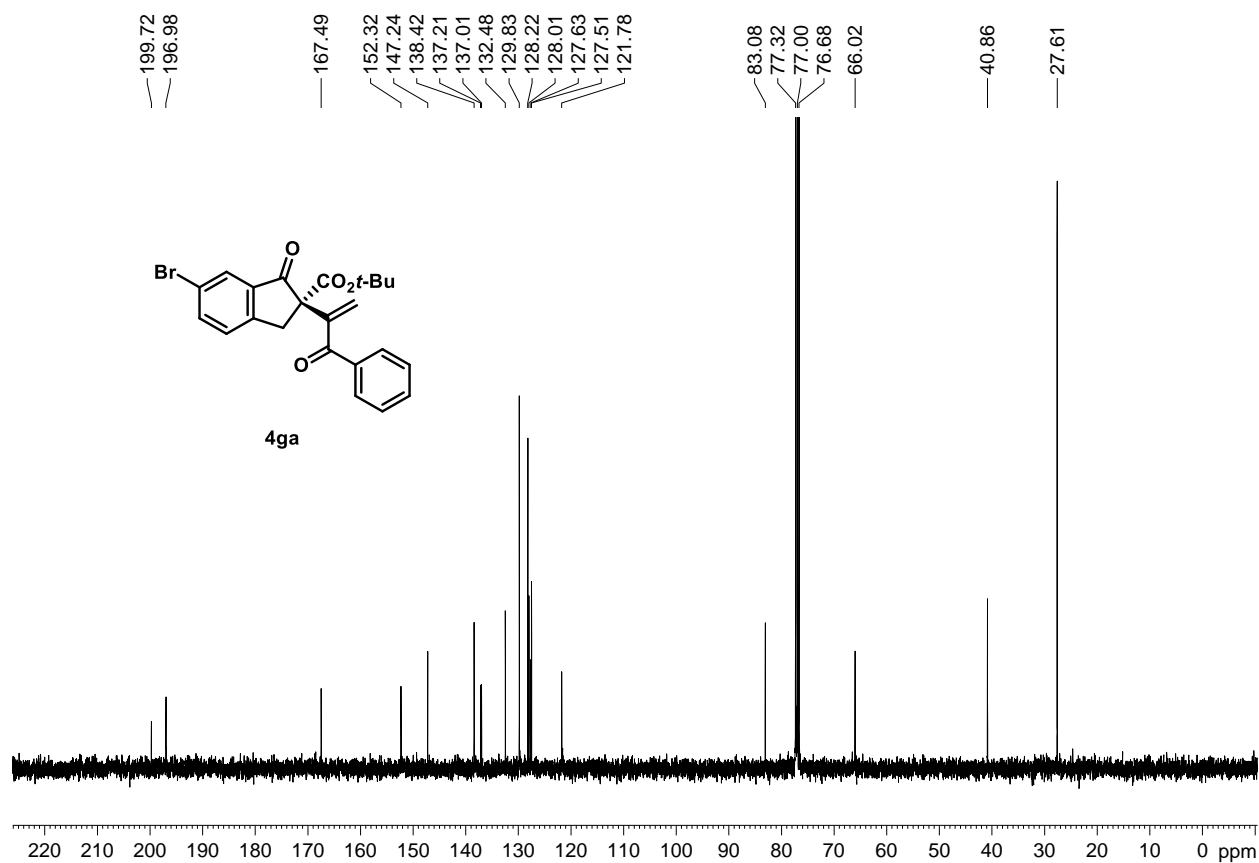



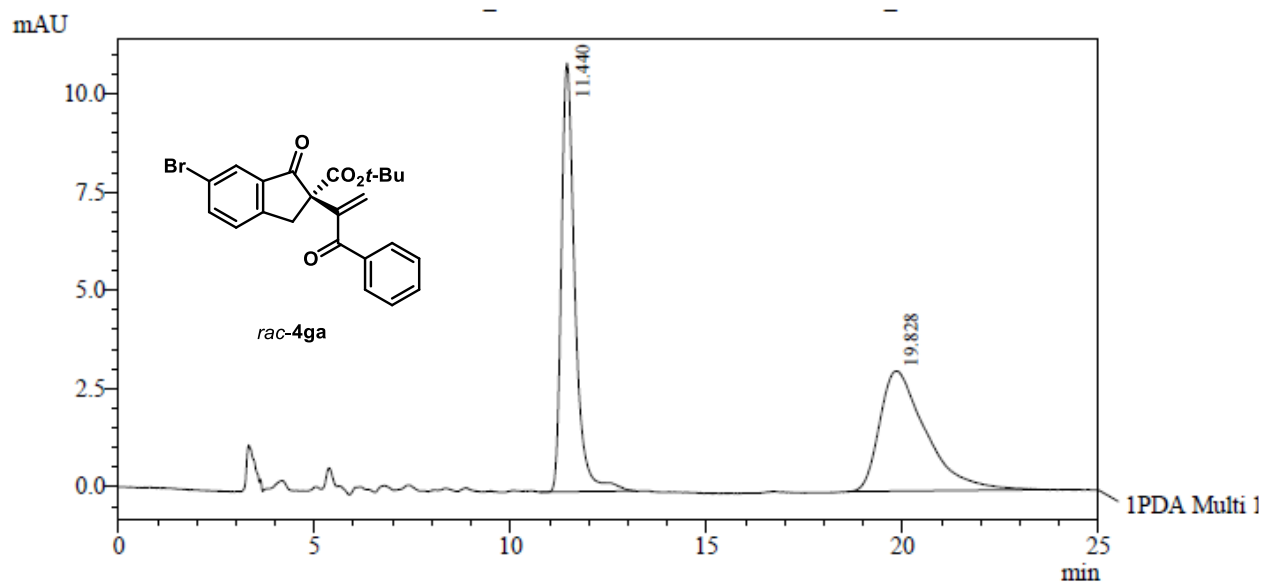

1 PDA Multi 1 / 254nm 4nm

PeakTable

PDA Ch1 254nm 4nm

| Peak# | Ret. Time | Area   | Area %  |
|-------|-----------|--------|---------|
| 1     | 11.440    | 262086 | 51.166  |
| 2     | 19.828    | 250137 | 48.834  |
| Total |           | 512224 | 100.000 |

Daicel Chiralpak IE column (*n*-Hexane/IPA = 90:10, 1.0 mL min<sup>-1</sup>, 20 °C, 254 nm)

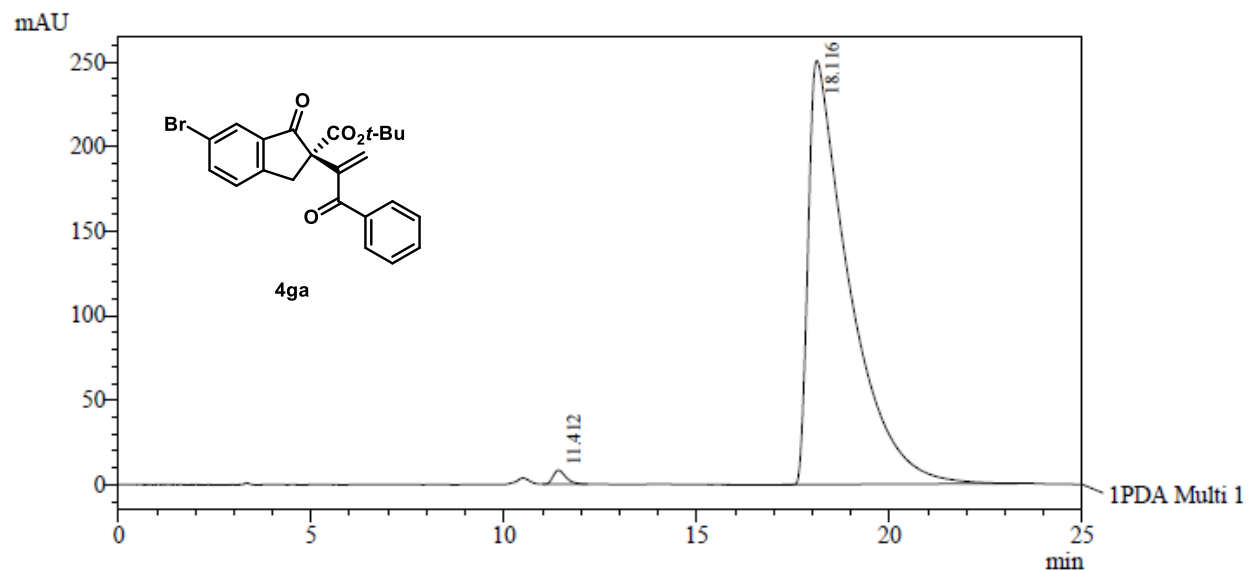

1 PDA Multi 1 / 254nm 4nm

PeakTable

PDA Ch1 254nm 4nm

| Peak# | Ret. Time | Area     | Area %  |
|-------|-----------|----------|---------|
| 1     | 11.412    | 187942   | 1.006   |
| 2     | 18.116    | 18485113 | 98.994  |
| Total |           | 18673055 | 100.000 |

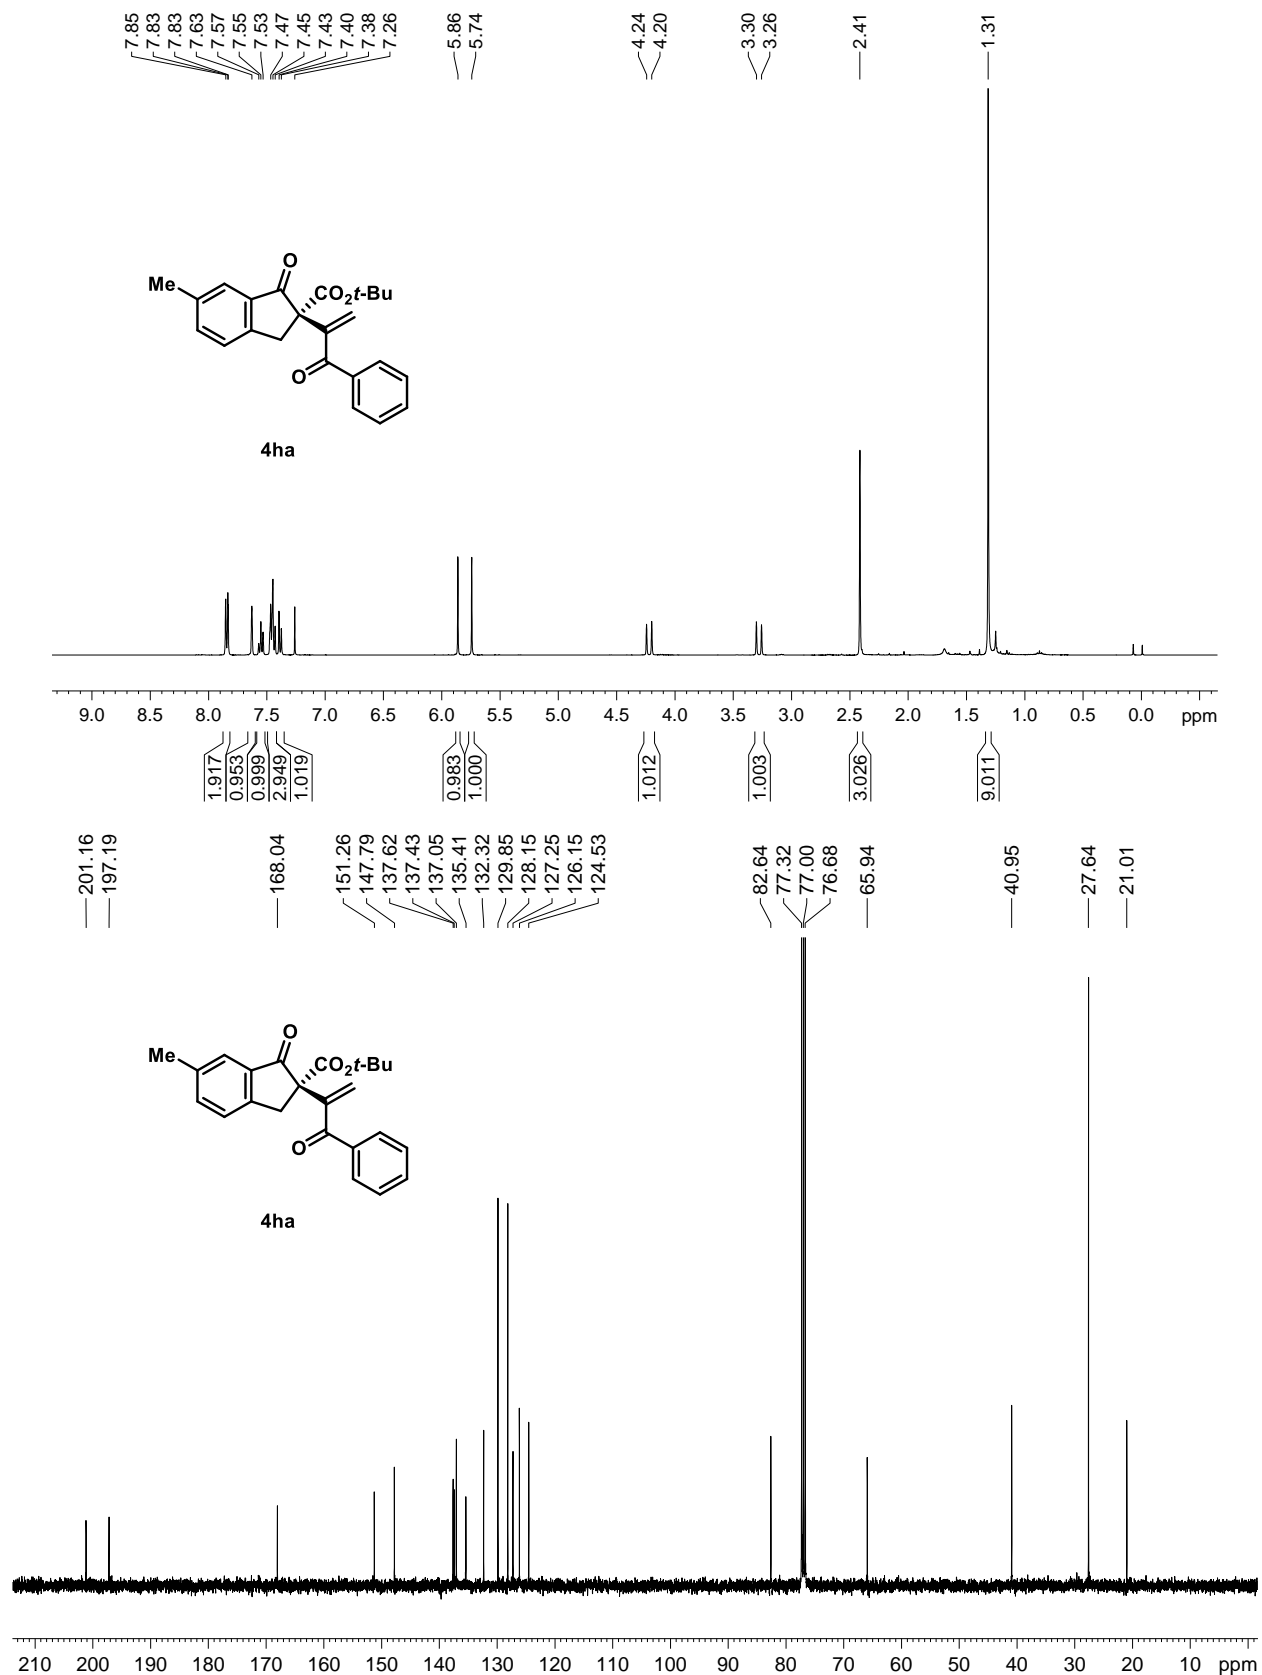

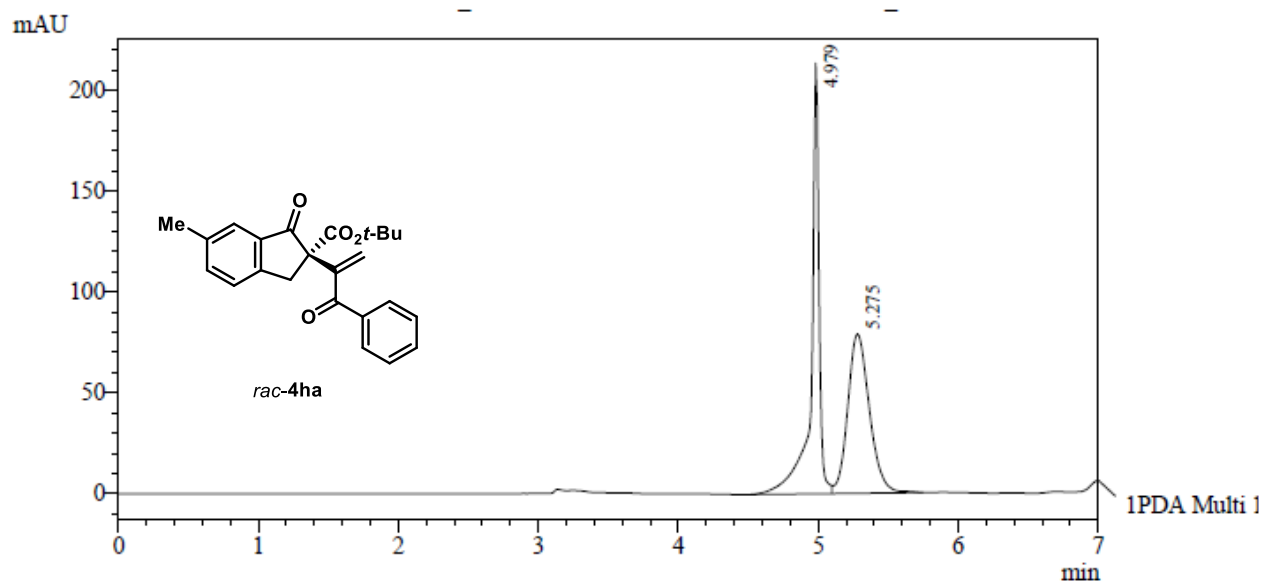

1 PDA Multi 1 / 254nm 4nm

PeakTable

PDA Ch1 254nm 4nm

| Peak# | Ret. Time | Area    | Area %  |
|-------|-----------|---------|---------|
| 1     | 4.979     | 830728  | 49.407  |
| 2     | 5.275     | 850675  | 50.593  |
| Total |           | 1681404 | 100.000 |

Daicel Chiralpak AS-H column (*n*-Hexane/EtOH = 95:5, 1.0 mL min<sup>-1</sup>, 20 °C, 254 nm)

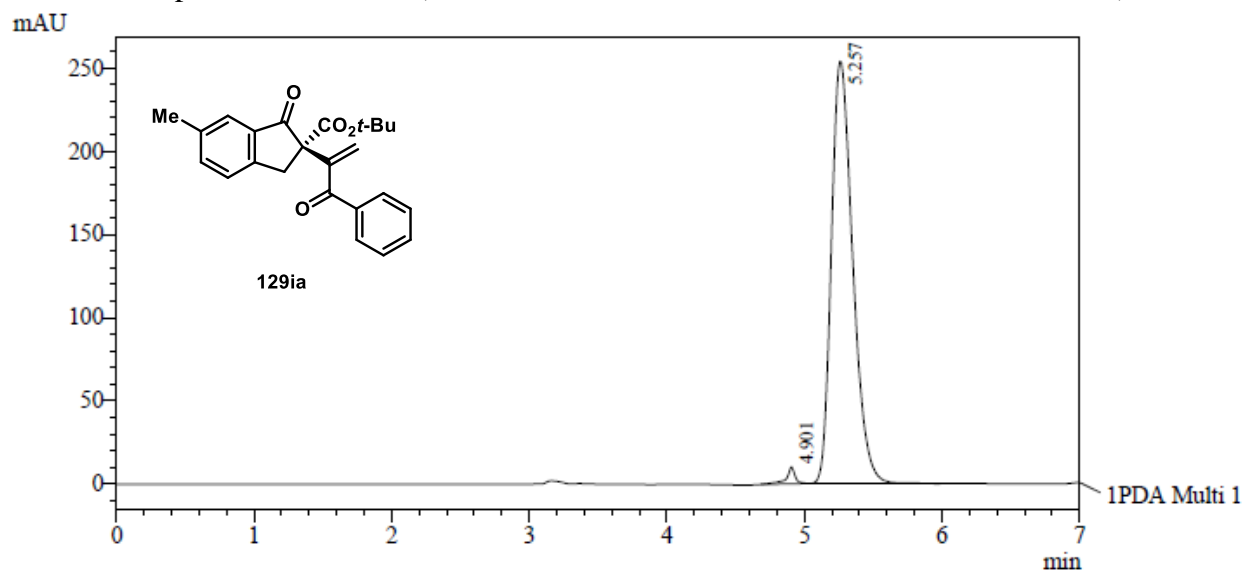

1 PDA Multi 1 / 254nm 4nm

PeakTable

PDA Ch1 254nm 4nm

| Peak# | Ret. Time | Area    | Area %  |
|-------|-----------|---------|---------|
| 1     | 4.901     | 43839   | 1.577   |
| 2     | 5.257     | 2736220 | 98.423  |
| Total |           | 2780059 | 100.000 |

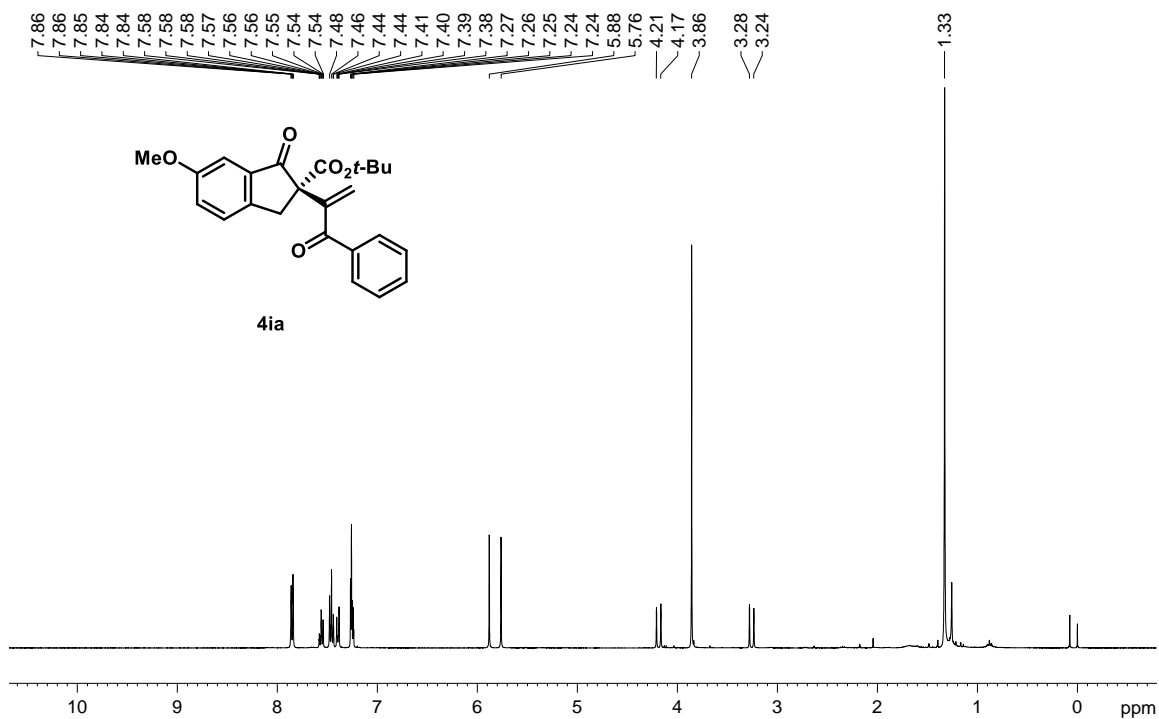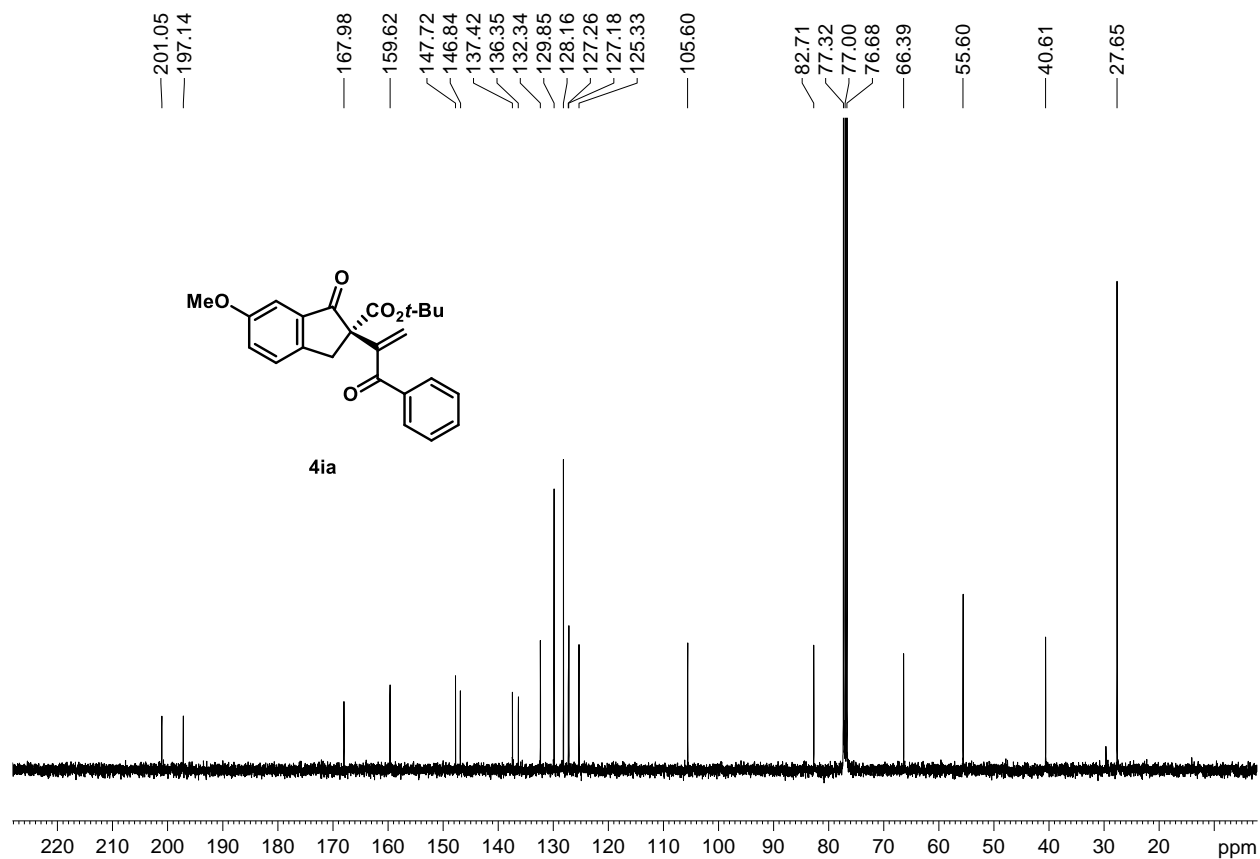

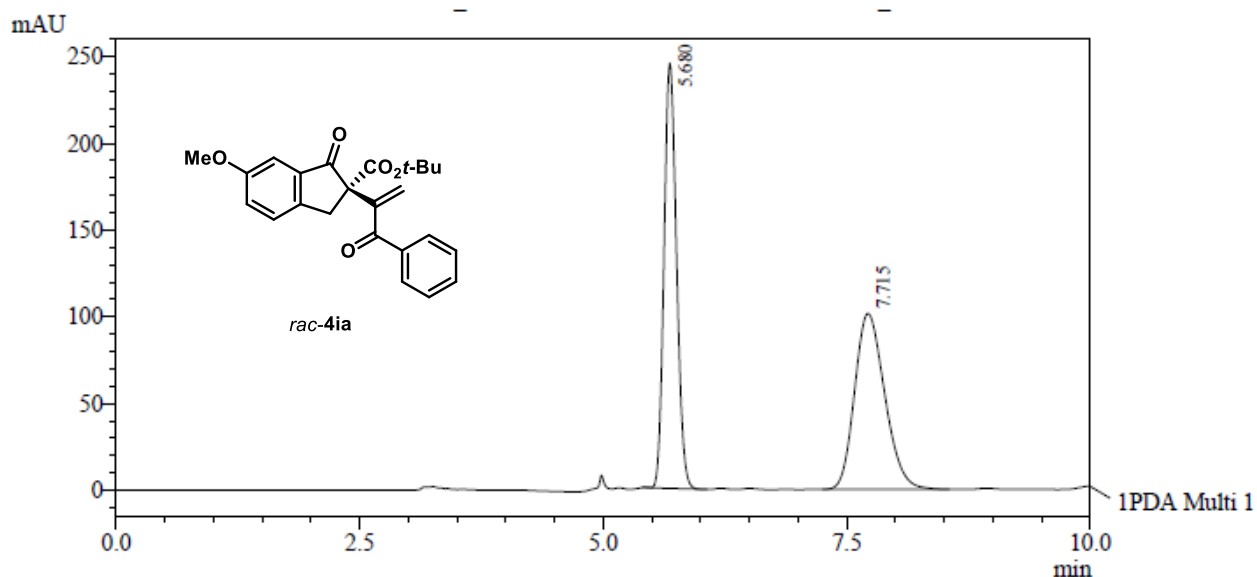

1 PDA Multi 1 / 254nm 4nm

PeakTable

PDA Ch1 254nm 4nm

| Peak# | Ret. Time | Area    | Area %  |
|-------|-----------|---------|---------|
| 1     | 5.680     | 2182074 | 49.971  |
| 2     | 7.715     | 2184618 | 50.029  |
| Total |           | 4366692 | 100.000 |

Daicel Chiralpak AS-H column (*n*-Hexane/EtOH = 95:5, 1.0 mL min<sup>-1</sup>, 20 °C, 254 nm)

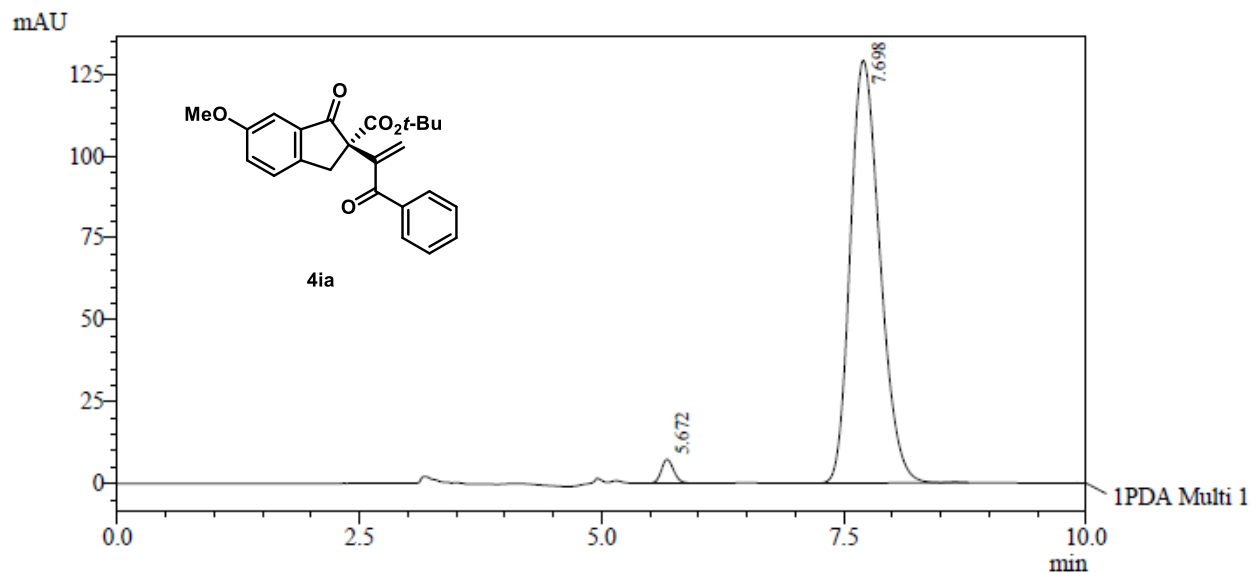

1 PDA Multi 1 / 254nm 4nm

PeakTable

PDA Ch1 254nm 4nm

| Peak# | Ret. Time | Area    | Area %  |
|-------|-----------|---------|---------|
| 1     | 5.672     | 64327   | 2.284   |
| 2     | 7.698     | 2752598 | 97.716  |
| Total |           | 2816925 | 100.000 |

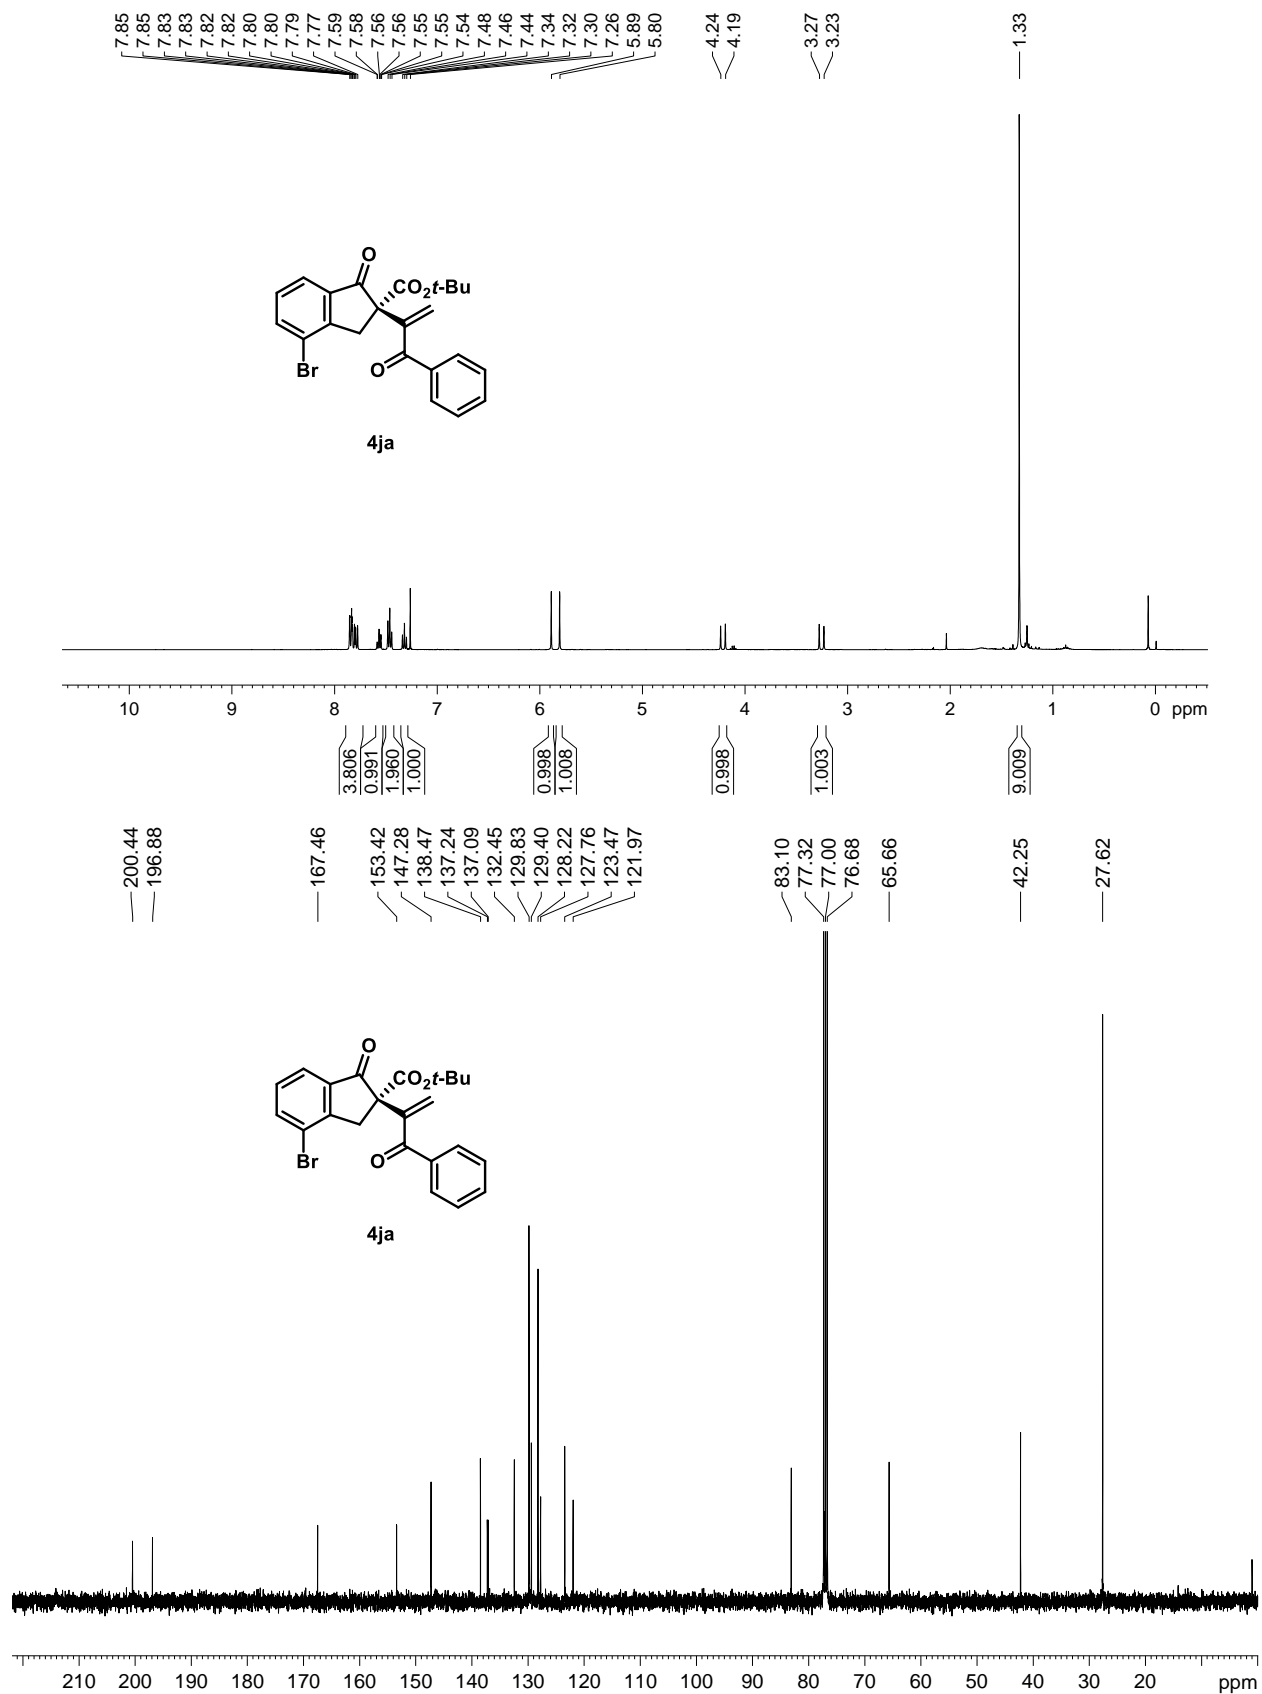

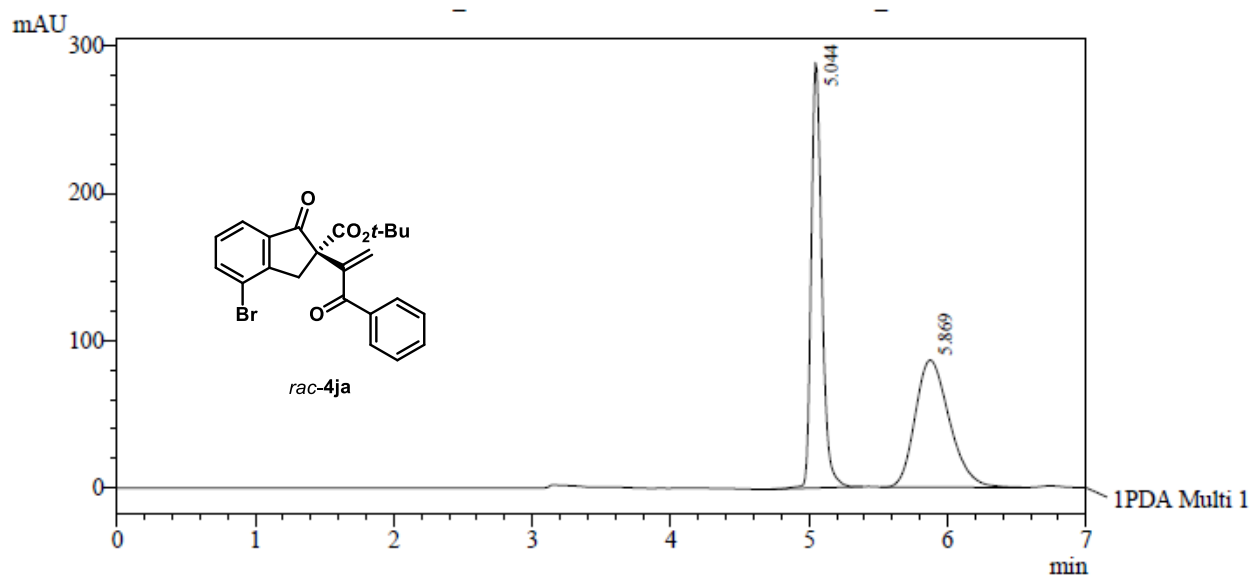

1 PDA Multi 1 / 254nm 4nm

PeakTable

PDA Ch1 254nm 4nm

| Peak# | Ret. Time | Area    | Area %  |
|-------|-----------|---------|---------|
| 1     | 5.044     | 1540045 | 50.911  |
| 2     | 5.869     | 1484926 | 49.089  |
| Total |           | 3024971 | 100.000 |

Daicel Chiralpak AS-H column (*n*-Hexane/EtOH = 95:5, 1.0 mL min<sup>-1</sup>, 20 °C, 254 nm)

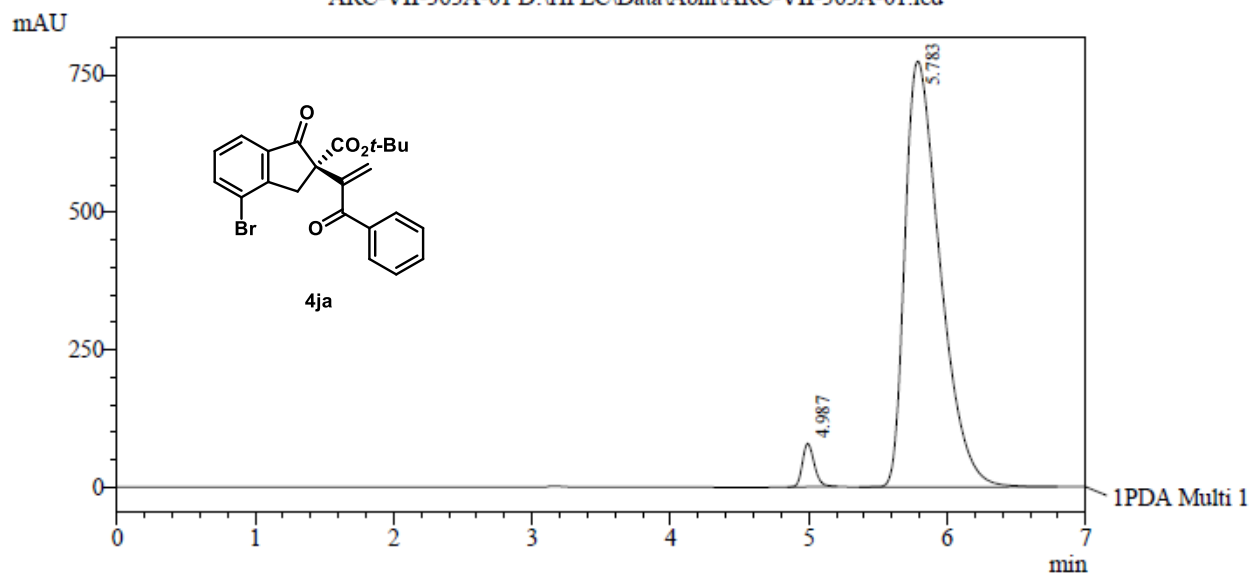

1 PDA Multi 1 / 254nm 4nm

PeakTable

PDA Ch1 254nm 4nm

| Peak# | Ret. Time | Area     | Area %  |
|-------|-----------|----------|---------|
| 1     | 4.987     | 471970   | 3.340   |
| 2     | 5.783     | 13659276 | 96.660  |
| Total |           | 14131246 | 100.000 |

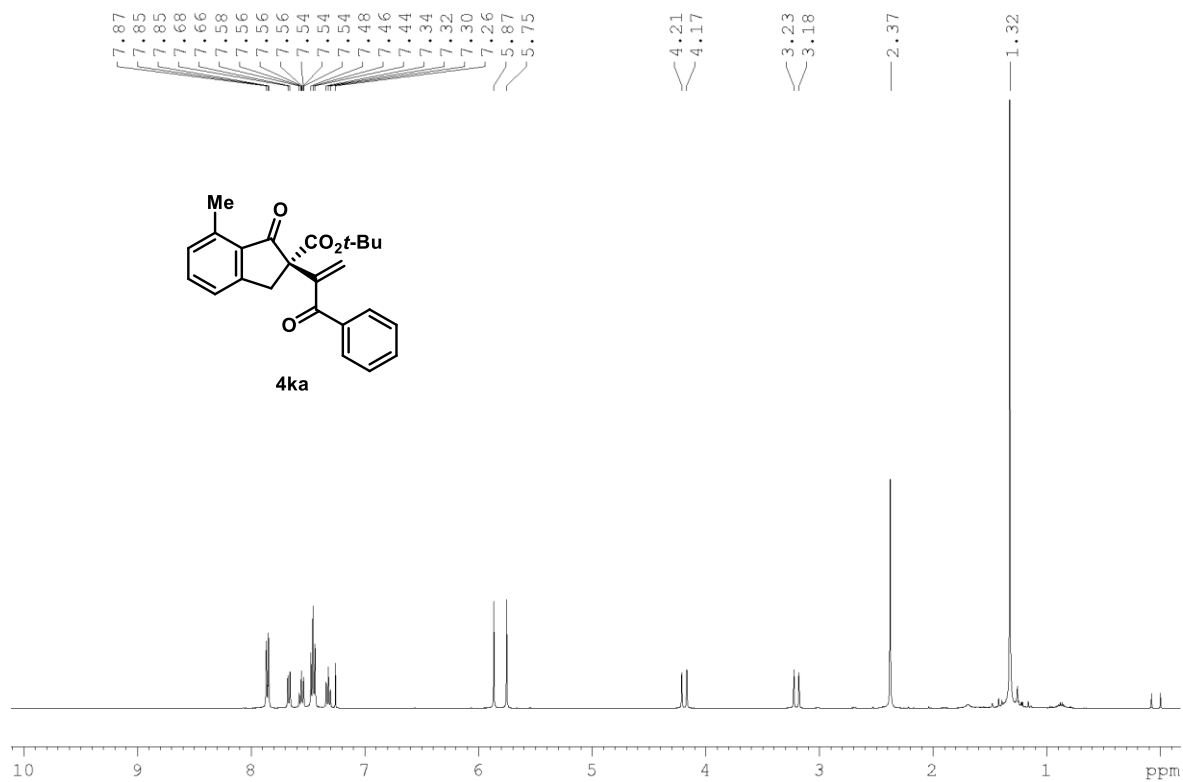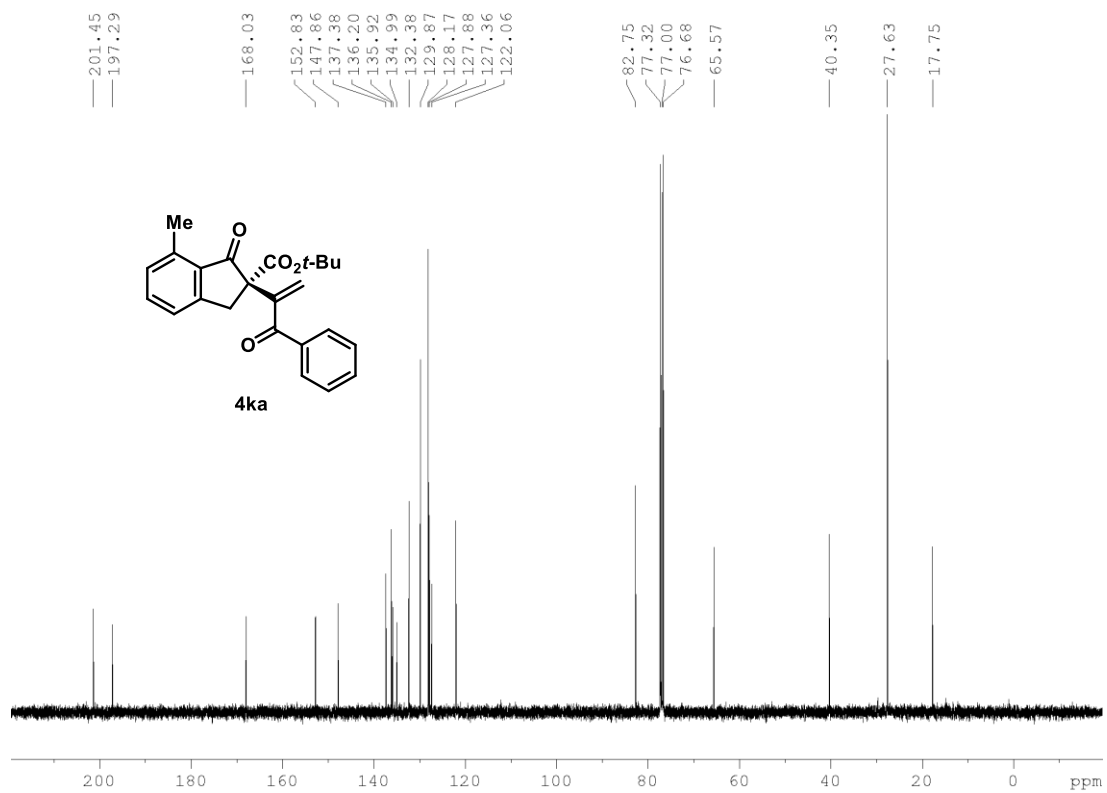



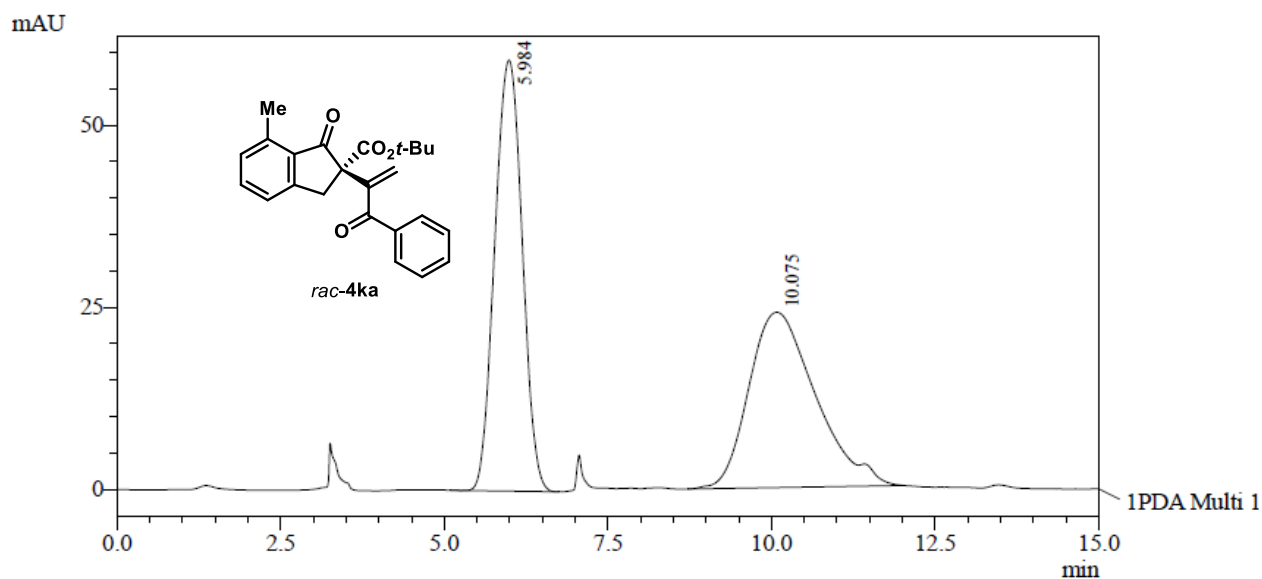

1 PDA Multi 1 / 254nm 4nm

PeakTable

PDA Ch1 254nm 4nm

| Peak# | Ret. Time | Area    | Area %  |
|-------|-----------|---------|---------|
| 1     | 5.984     | 1730760 | 50.309  |
| 2     | 10.075    | 1709510 | 49.691  |
| Total |           | 3440270 | 100.000 |

Daicel Chiralpak AS-H column (*n*-Hexane/EtOH = 98:2, 1.0 mL min<sup>-1</sup>, 20 °C, 254 nm)

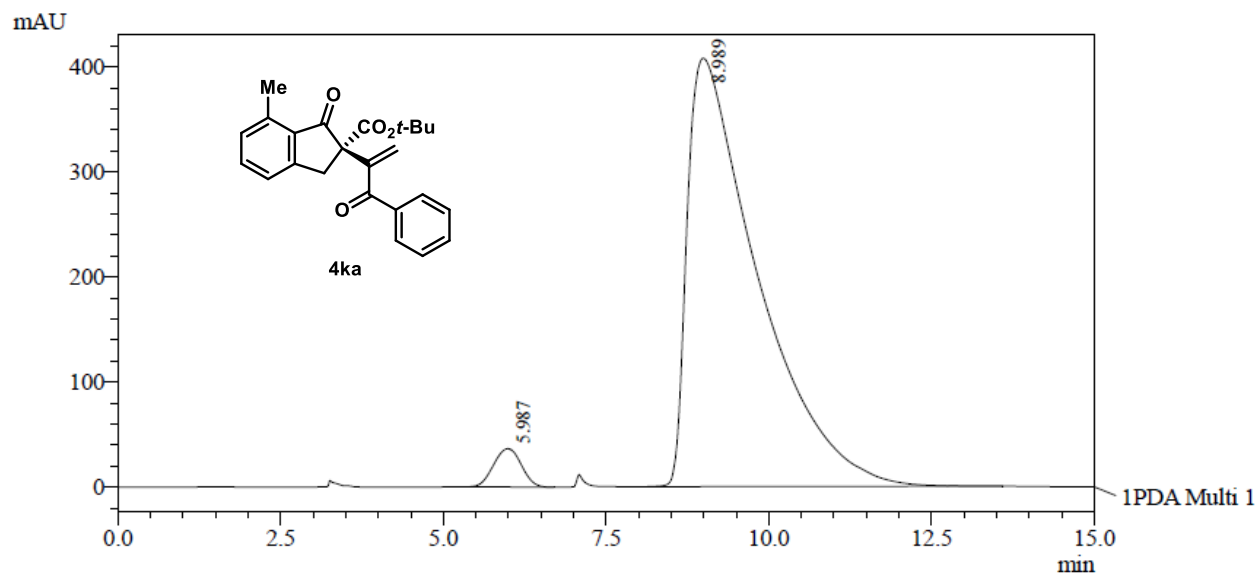

1 PDA Multi 1 / 254nm 4nm

PeakTable

PDA Ch1 254nm 4nm

| Peak# | Ret. Time | Area     | Area %  |
|-------|-----------|----------|---------|
| 1     | 5.987     | 1086190  | 3.414   |
| 2     | 8.989     | 30731302 | 96.586  |
| Total |           | 31817492 | 100.000 |

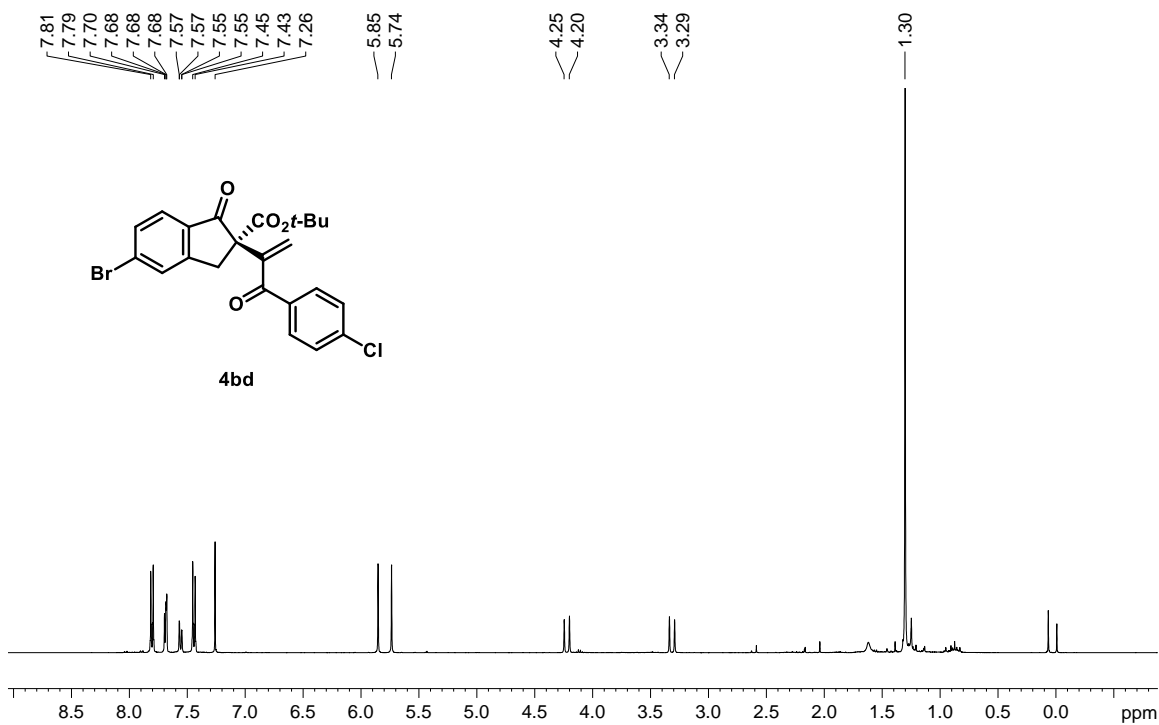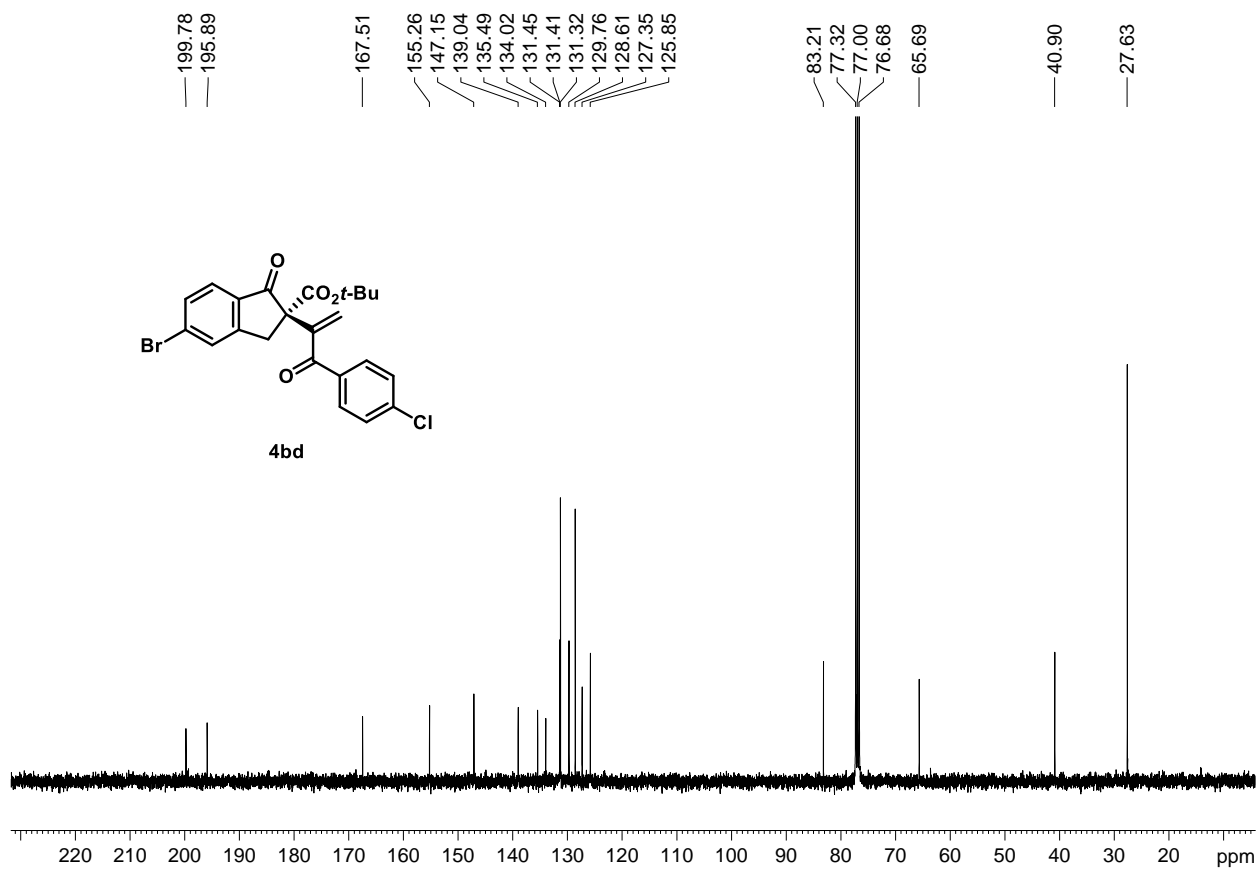

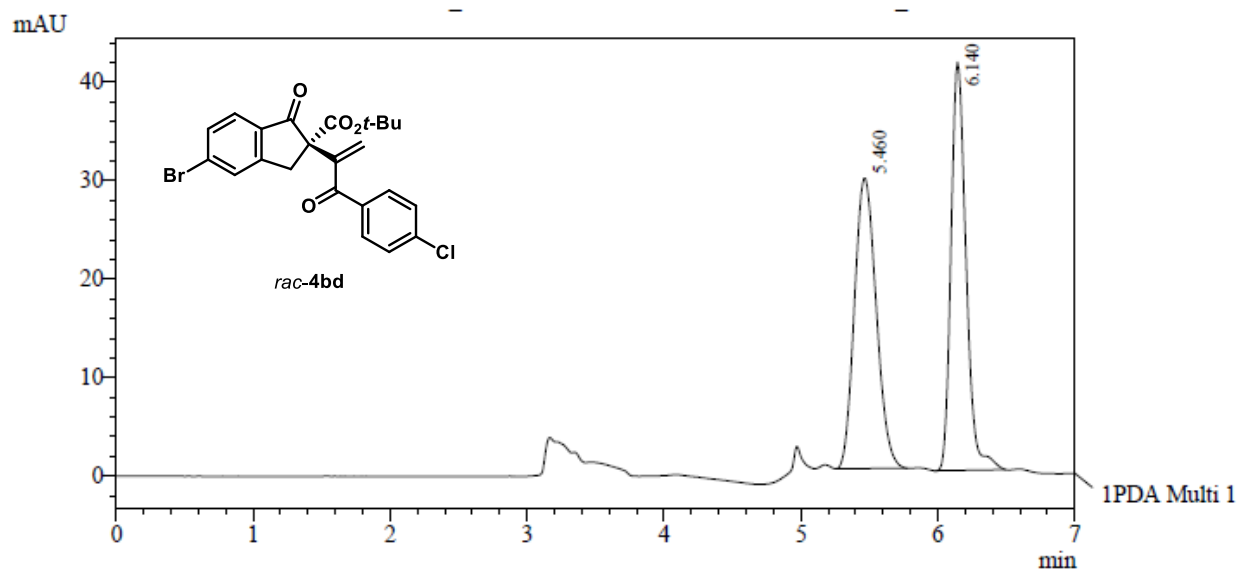

1 PDA Multi 1 / 254nm 4nm

PeakTable

PDA Ch1 254nm 4nm

| Peak# | Ret. Time | Area   | Area %  |
|-------|-----------|--------|---------|
| 1     | 5.460     | 326919 | 50.773  |
| 2     | 6.140     | 316967 | 49.227  |
| Total |           | 643886 | 100.000 |

Daicel Chiralpak AS-H column (*n*-Hexane/EtOH = 95:5, 1.0 mL min<sup>-1</sup>, 20 °C, 254 nm)

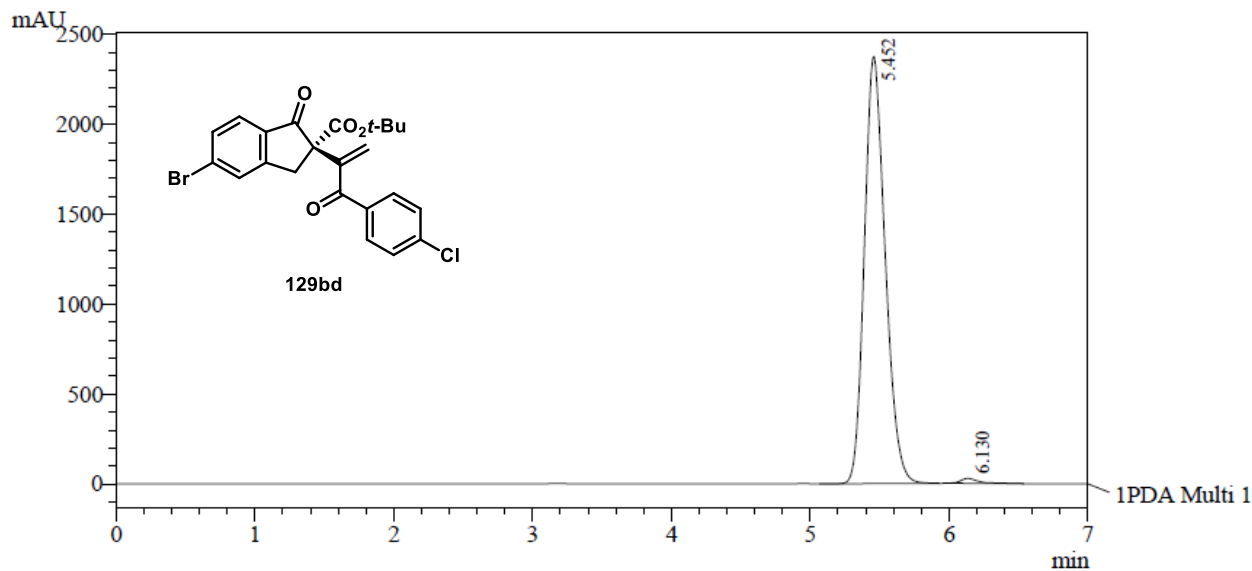

1 PDA Multi 1 / 254nm 4nm

PeakTable

PDA Ch1 254nm 4nm

| Peak# | Ret. Time | Area     | Area %  |
|-------|-----------|----------|---------|
| 1     | 5.452     | 24769208 | 99.030  |
| 2     | 6.130     | 242613   | 0.970   |
| Total |           | 25011821 | 100.000 |

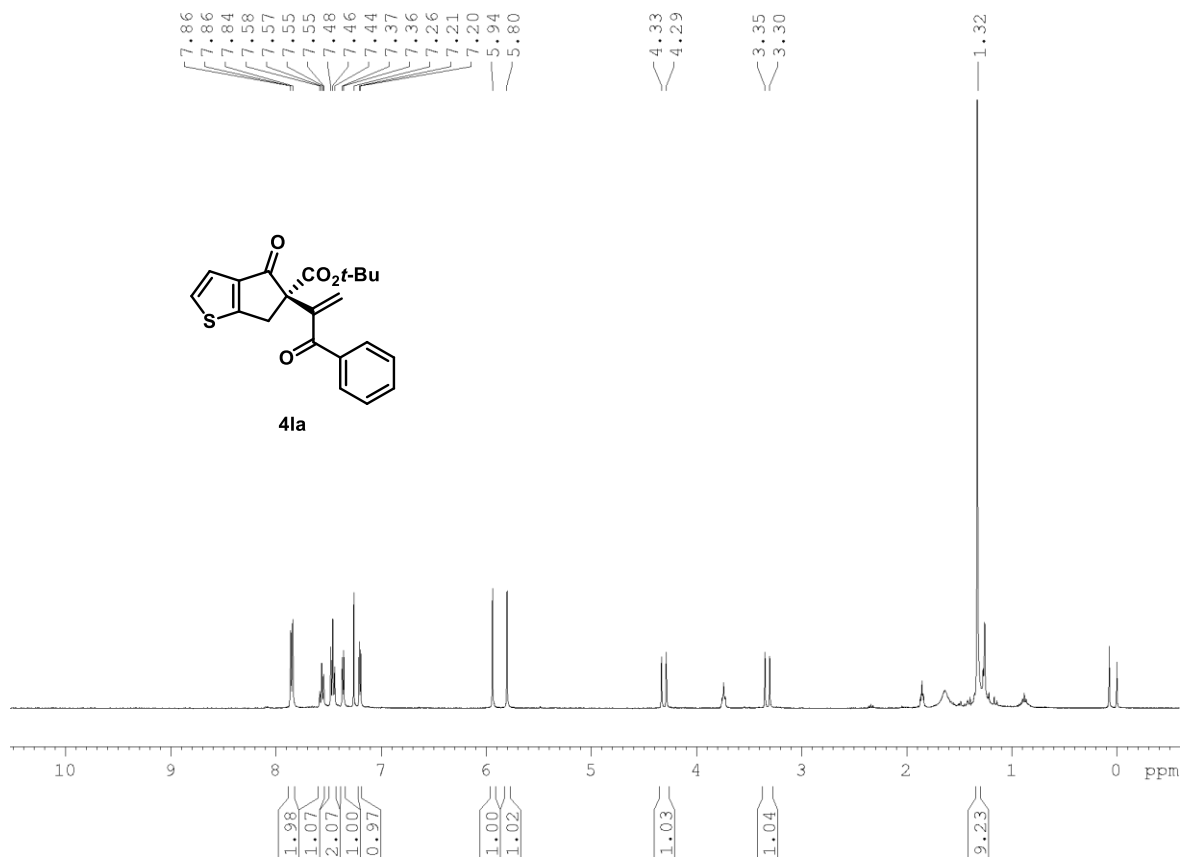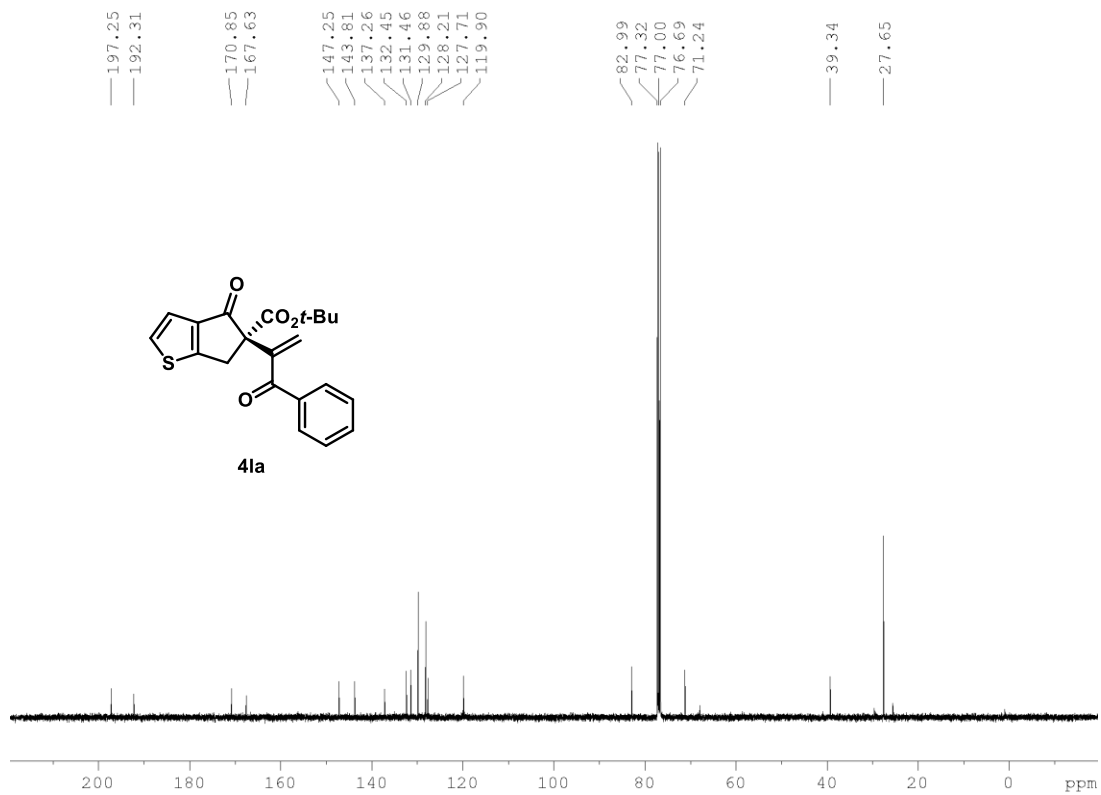

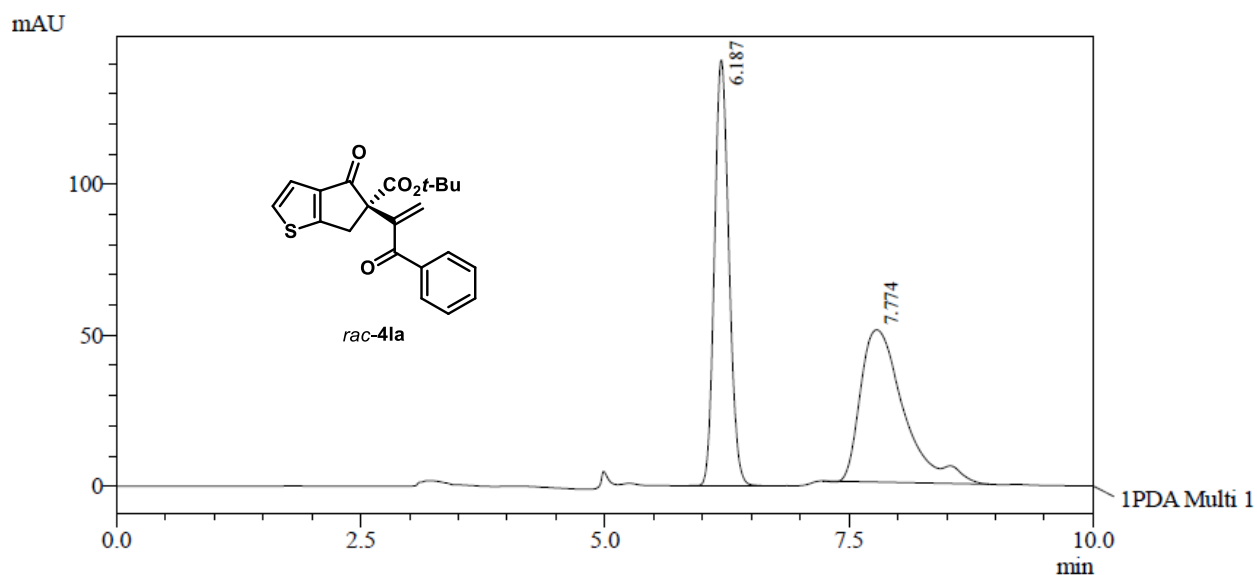

1 PDA Multi 1 / 254nm 4nm

PeakTable

PDA Ch1 254nm 4nm

| Peak# | Ret. Time | Area    | Area %  |
|-------|-----------|---------|---------|
| 1     | 6.187     | 1458242 | 48.255  |
| 2     | 7.774     | 1563683 | 51.745  |
| Total |           | 3021925 | 100.000 |

Daicel Chiralpak AS-H column (*n*-Hexane/EtOH = 95:5, 1.0 mL min<sup>-1</sup>, 20 °C, 254 nm)

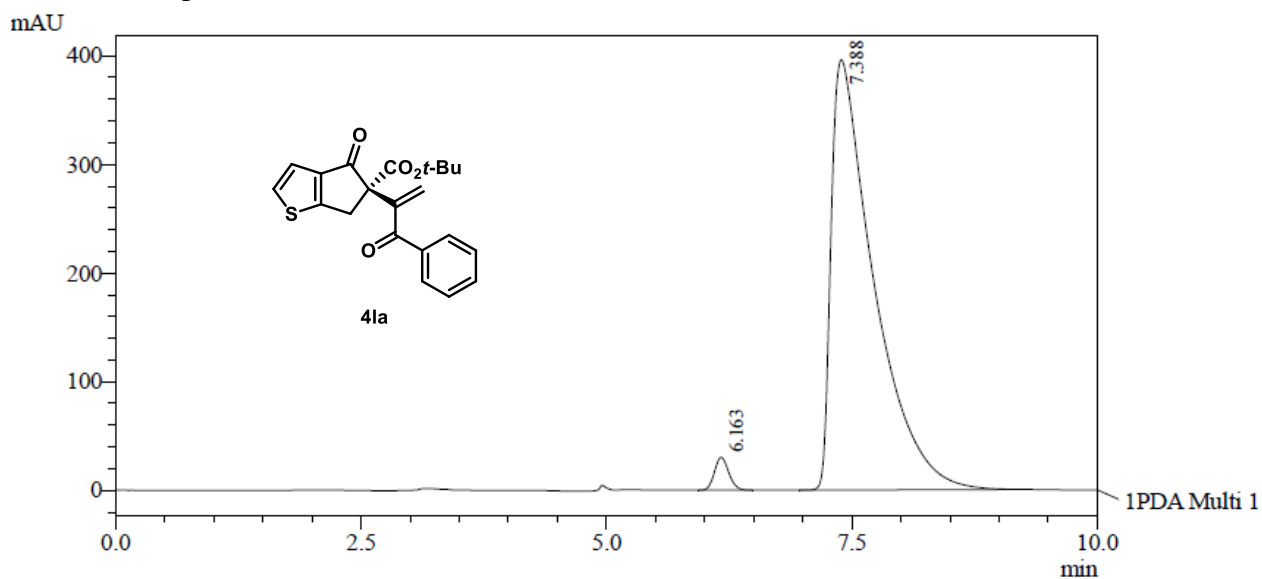

1 PDA Multi 1 / 254nm 4nm

PeakTable

PDA Ch1 254nm 4nm

| Peak# | Ret. Time | Area     | Area %  |
|-------|-----------|----------|---------|
| 1     | 6.163     | 305797   | 2.491   |
| 2     | 7.388     | 11969175 | 97.509  |
| Total |           | 12274972 | 100.000 |

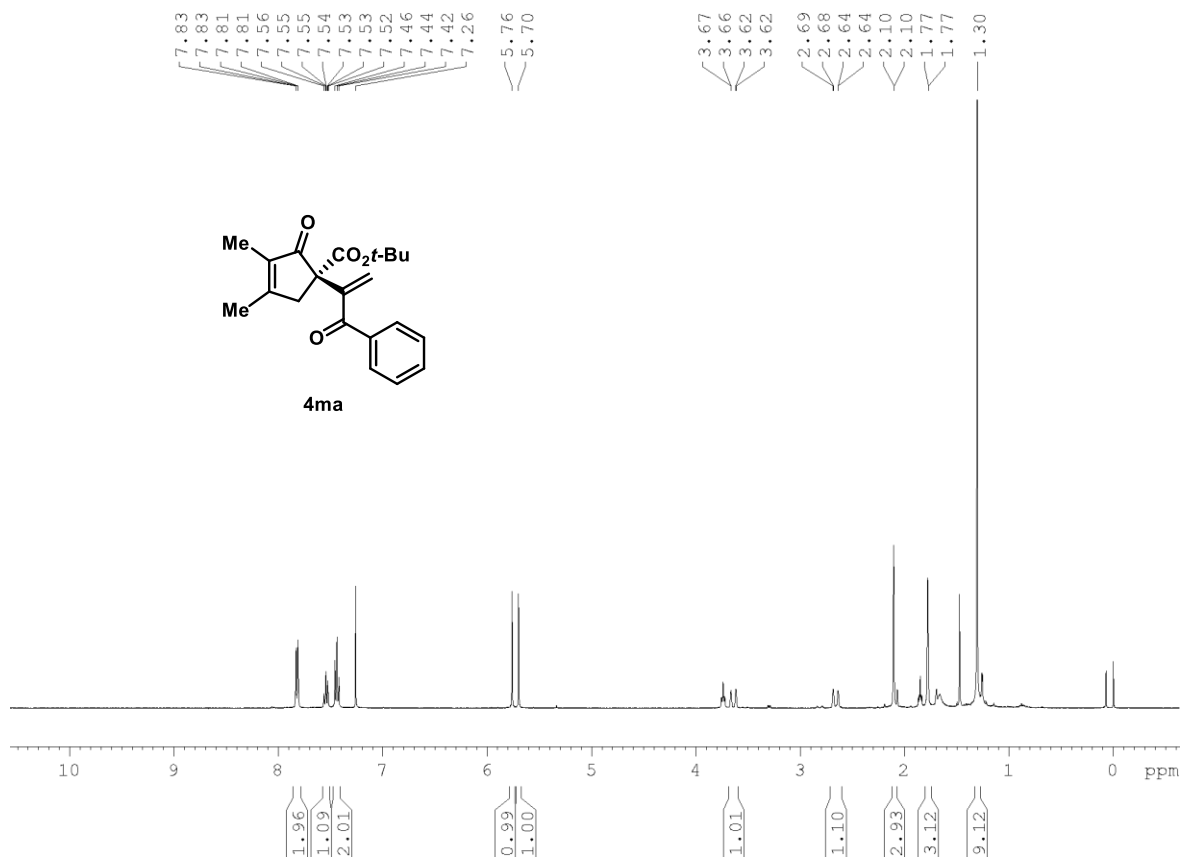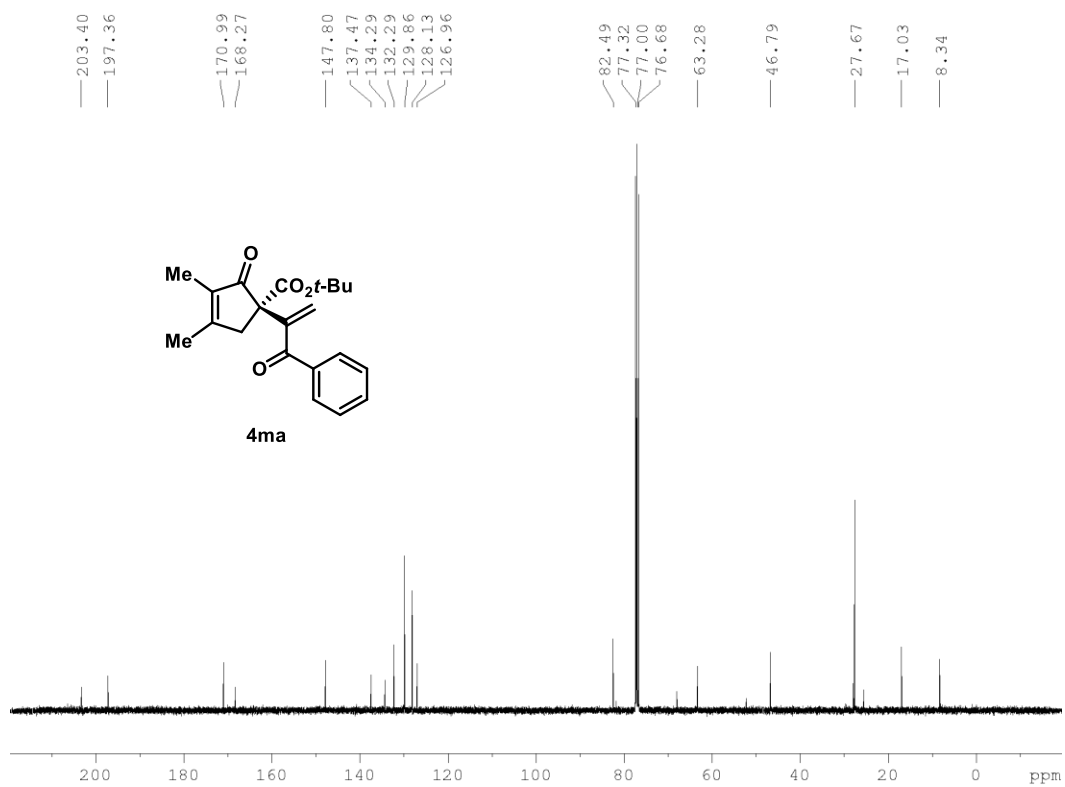

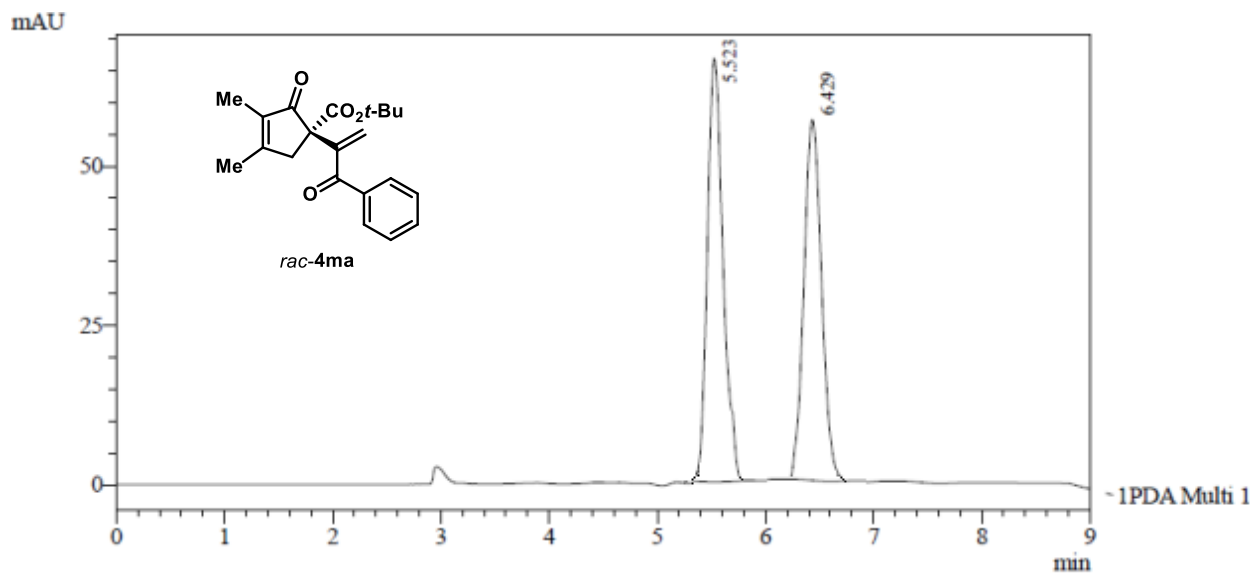

1 PDA Multi 1 / 254nm 4nm

PeakTable

PDA Ch1 254nm 4nm

| Peak# | Ret. Time | Area    | Area %  |
|-------|-----------|---------|---------|
| 1     | 5.523     | 588263  | 49.363  |
| 2     | 6.429     | 603439  | 50.637  |
| Total |           | 1191702 | 100.000 |

Phenomenex C1 column (*n*-Hexane/IPA = 95:5, 1.0 mL min<sup>-1</sup>, 20 °C, 254 nm)

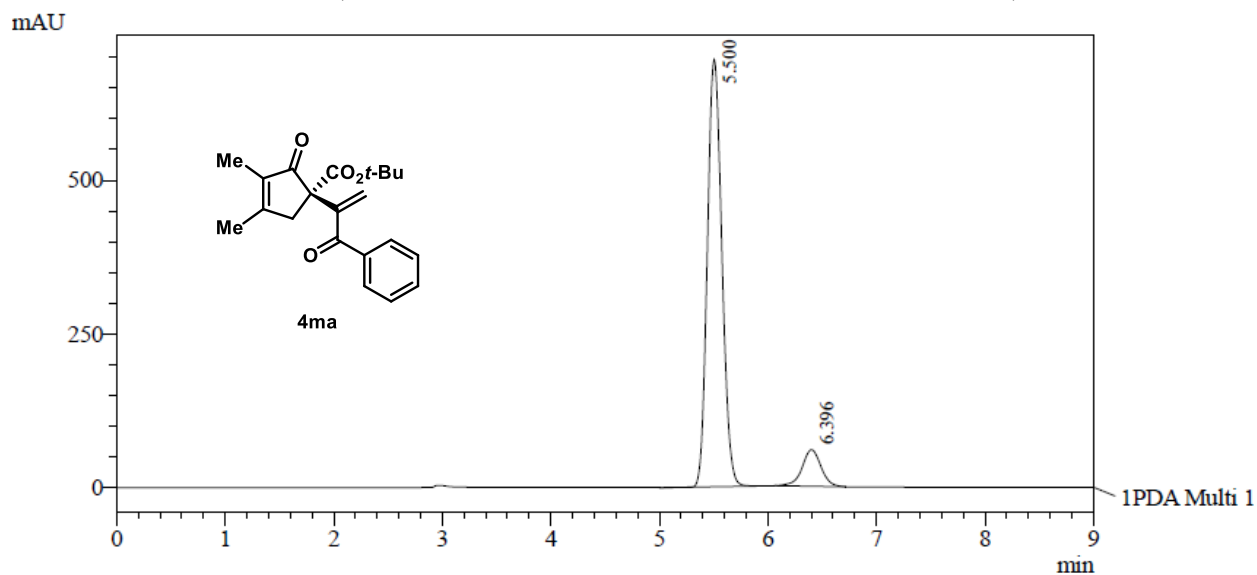

1 PDA Multi 1 / 254nm 4nm

PeakTable

PDA Ch1 254nm 4nm

| Peak# | Ret. Time | Area    | Area %  |
|-------|-----------|---------|---------|
| 1     | 5.500     | 6452425 | 89.952  |
| 2     | 6.396     | 720761  | 10.048  |
| Total |           | 7173186 | 100.000 |

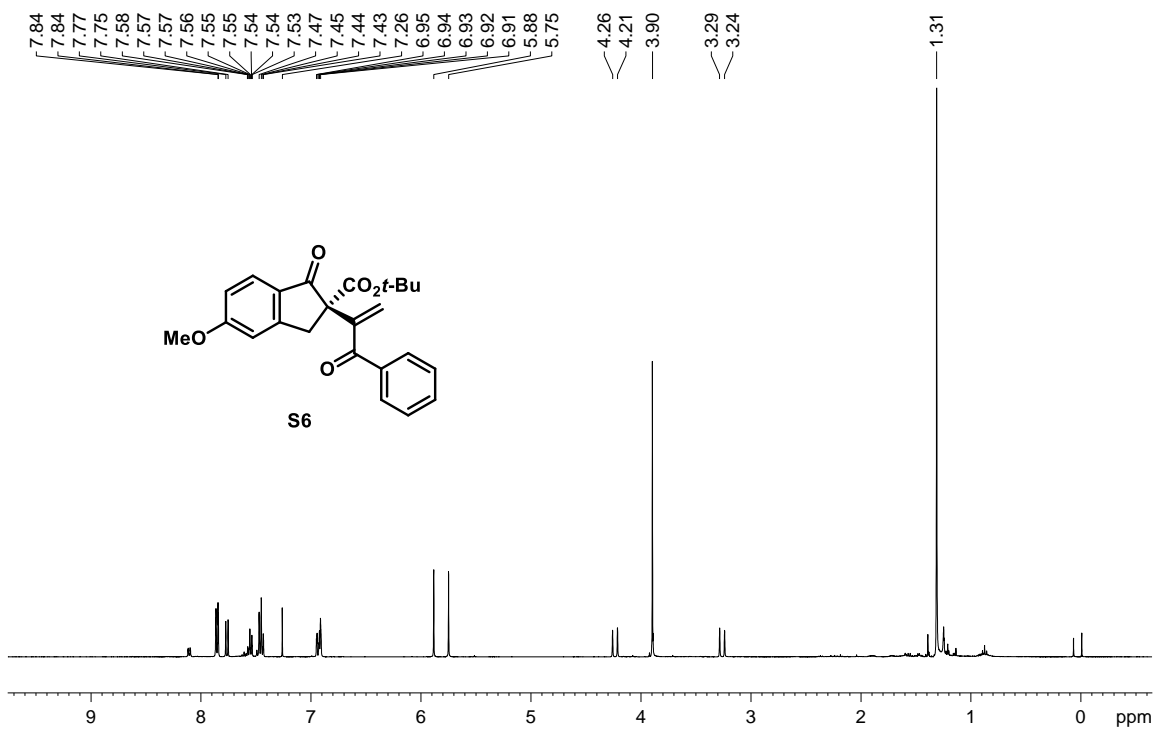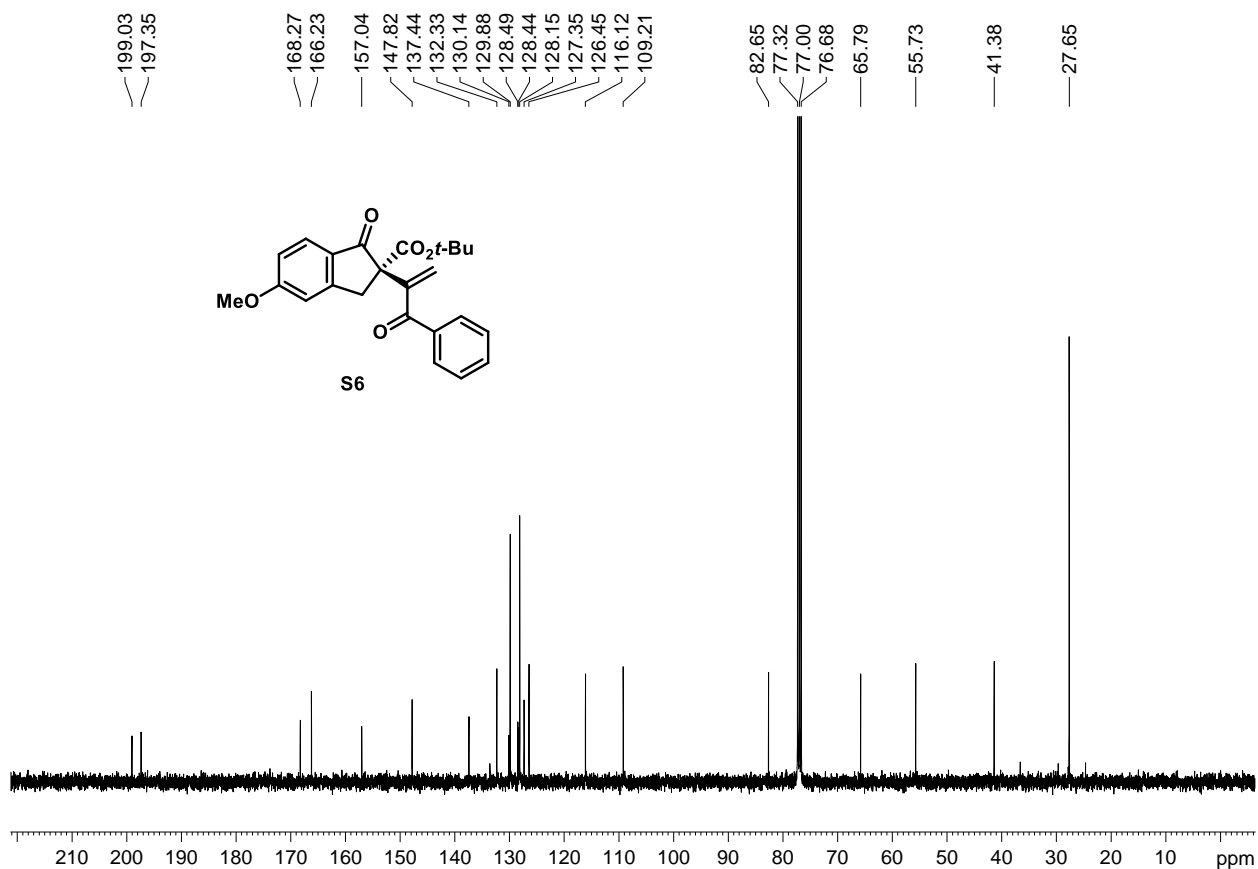



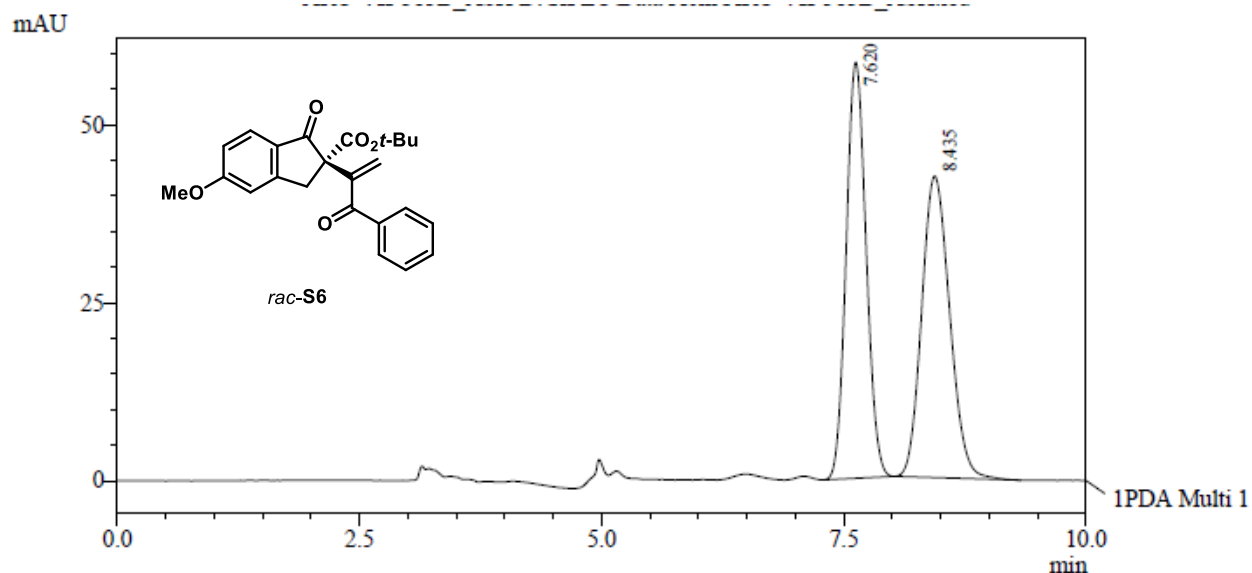

1 PDA Multi 1 / 254nm 4nm

PeakTable

PDA Ch1 254nm 4nm

| Peak# | Ret. Time | Area    | Area %  |
|-------|-----------|---------|---------|
| 1     | 7.620     | 836145  | 49.586  |
| 2     | 8.435     | 850102  | 50.414  |
| Total |           | 1686248 | 100.000 |

Daicel Chiralpak AS-H column (*n*-Hexane/EtOH = 95:5, 1.0 mL min<sup>-1</sup>, 20 °C, 254 nm)

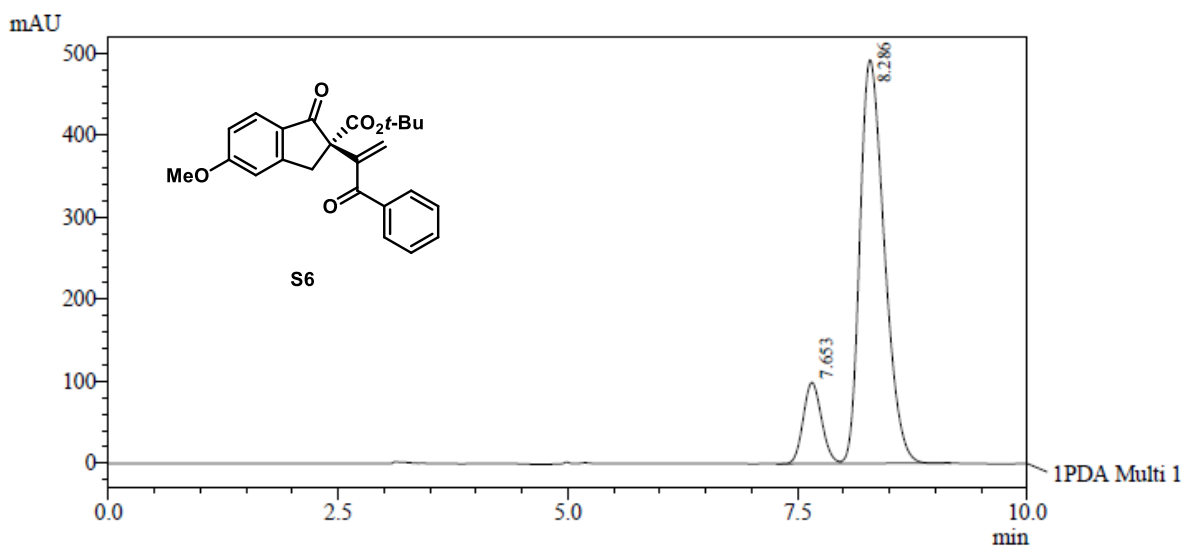

1 PDA Multi 1 / 254nm 4nm

PeakTable

PDA Ch1 254nm 4nm

| Peak# | Ret. Time | Area     | Area %  |
|-------|-----------|----------|---------|
| 1     | 7.653     | 1373932  | 13.110  |
| 2     | 8.286     | 9106220  | 86.890  |
| Total |           | 10480151 | 100.000 |

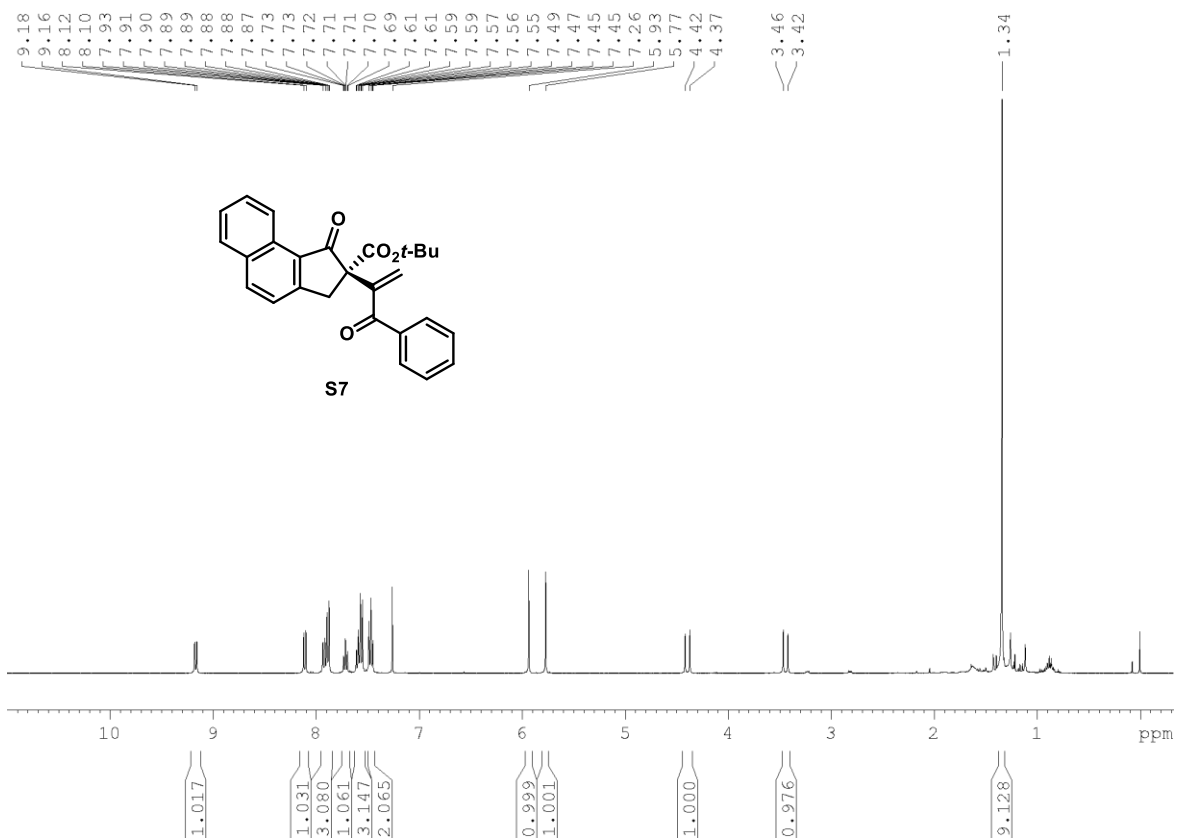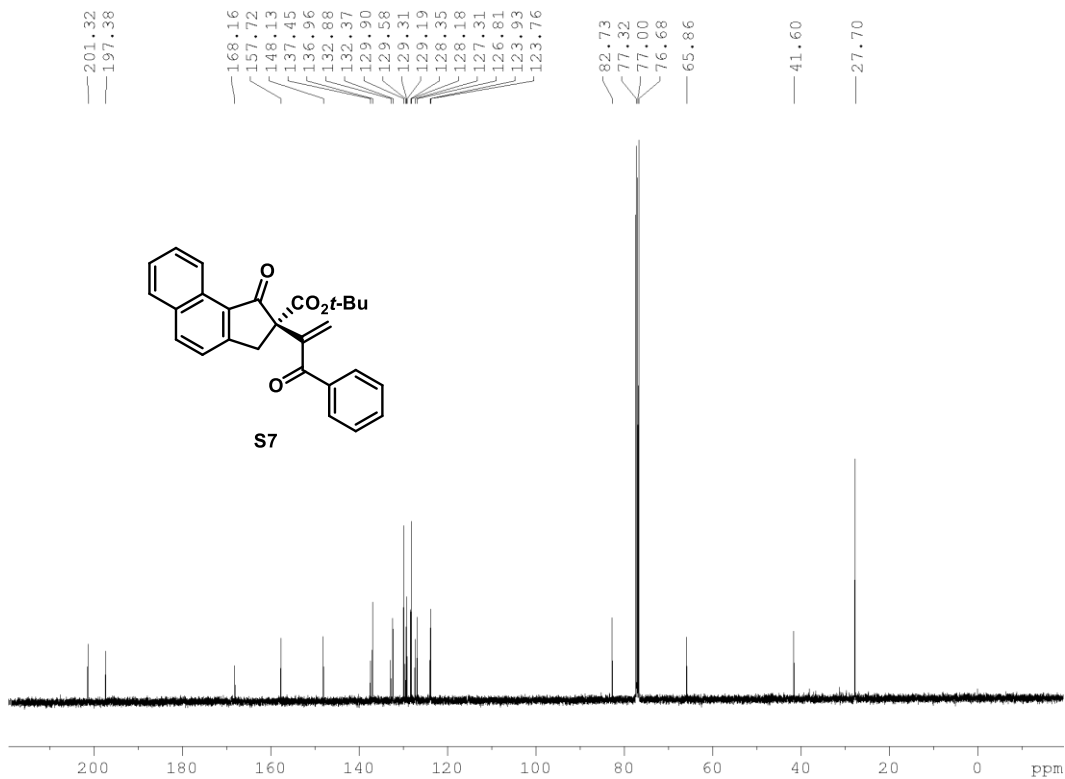

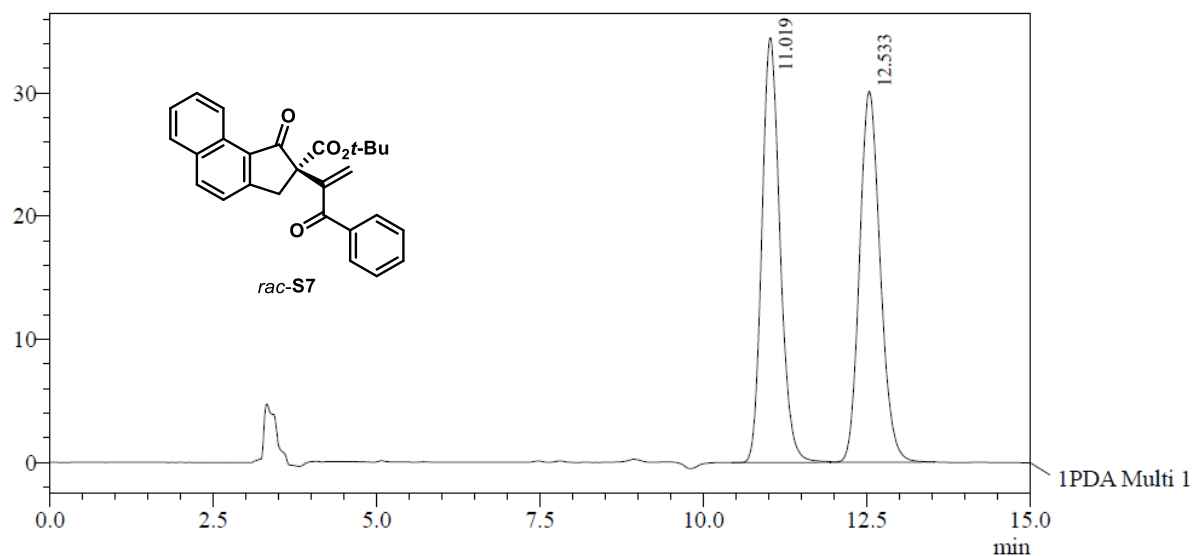

1 PDA Multi 1 / 254nm 4nm

PeakTable

PDA Ch1 254nm 4nm

| Peak# | Ret. Time | Area    | Area %  |
|-------|-----------|---------|---------|
| 1     | 11.019    | 665186  | 50.010  |
| 2     | 12.533    | 664911  | 49.990  |
| Total |           | 1330097 | 100.000 |

Daicel Chiralpak IC column (*n*-Hexane/IPA = 95:5, 1.0 mL min<sup>-1</sup>, 20 °C, 254 nm)

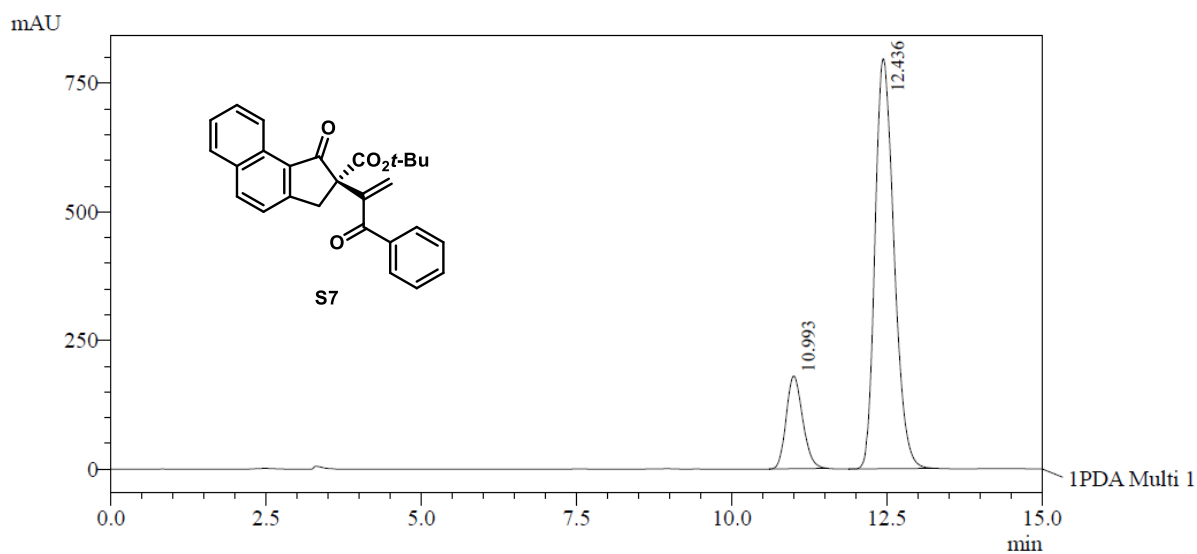

1 PDA Multi 1 / 254nm 4nm

PeakTable

PDA Ch1 254nm 4nm

| Peak# | Ret. Time | Area     | Area %  |
|-------|-----------|----------|---------|
| 1     | 10.993    | 3329740  | 16.386  |
| 2     | 12.436    | 16990640 | 83.614  |
| Total |           | 20320380 | 100.000 |

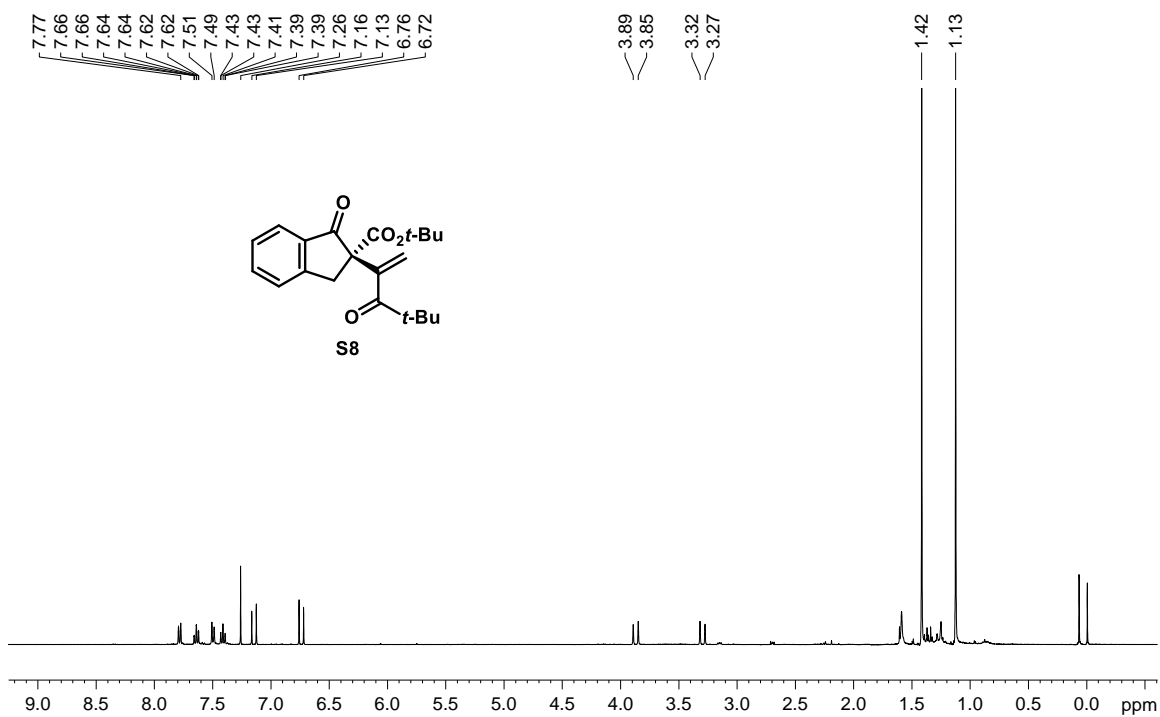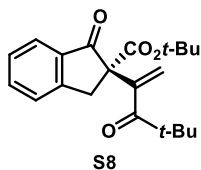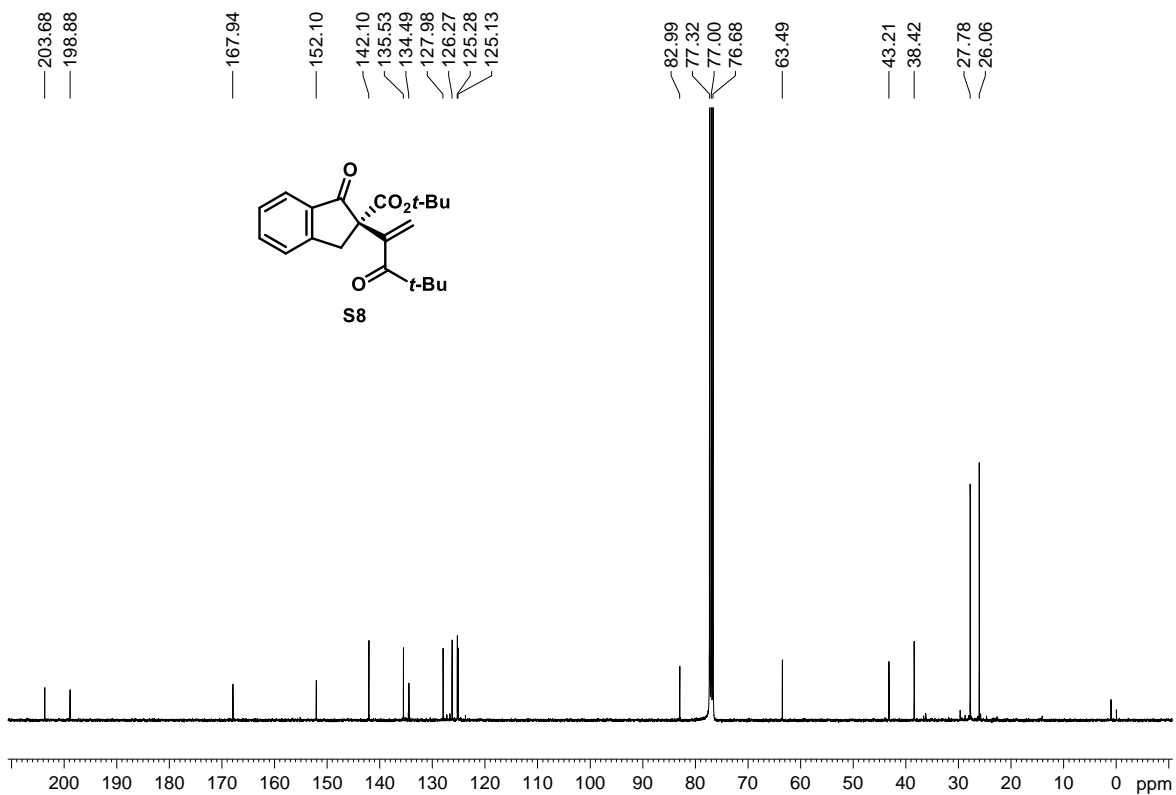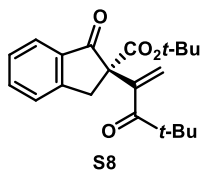

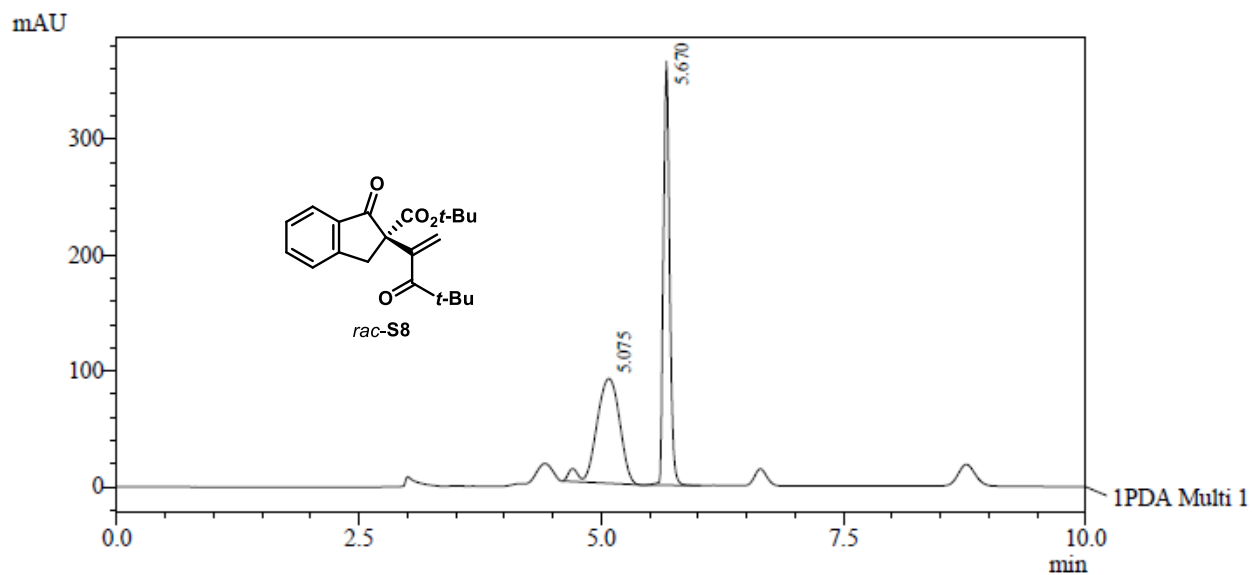

1 PDA Multi 1 / 254nm 4nm

PeakTable

PDA Ch1 254nm 4nm

| Peak# | Ret. Time | Area    | Area %  |
|-------|-----------|---------|---------|
| 1     | 5.075     | 1525132 | 48.332  |
| 2     | 5.670     | 1630390 | 51.668  |
| Total |           | 3155522 | 100.000 |

Phenomenex C-1 column (*n*-Hexane/EtOH = 95:5, 1.0 mL min<sup>-1</sup>, 20 °C, 254 nm)

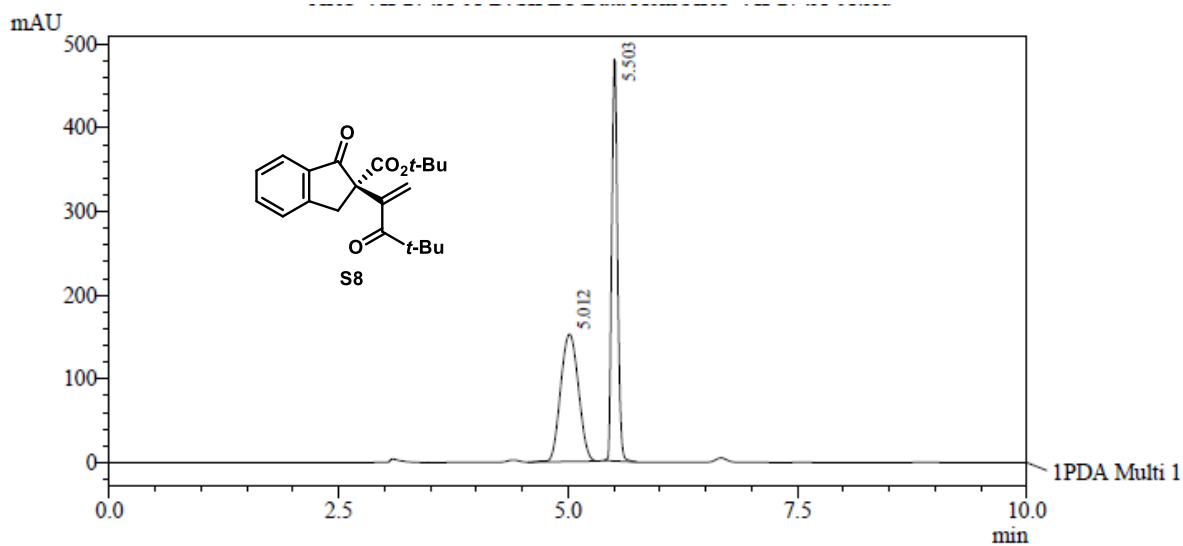

1 PDA Multi 1 / 254nm 4nm

PeakTable

PDA Ch1 254nm 4nm

| Peak# | Ret. Time | Area    | Area %  |
|-------|-----------|---------|---------|
| 1     | 5.012     | 2057338 | 49.543  |
| 2     | 5.503     | 2095281 | 50.457  |
| Total |           | 4152619 | 100.000 |

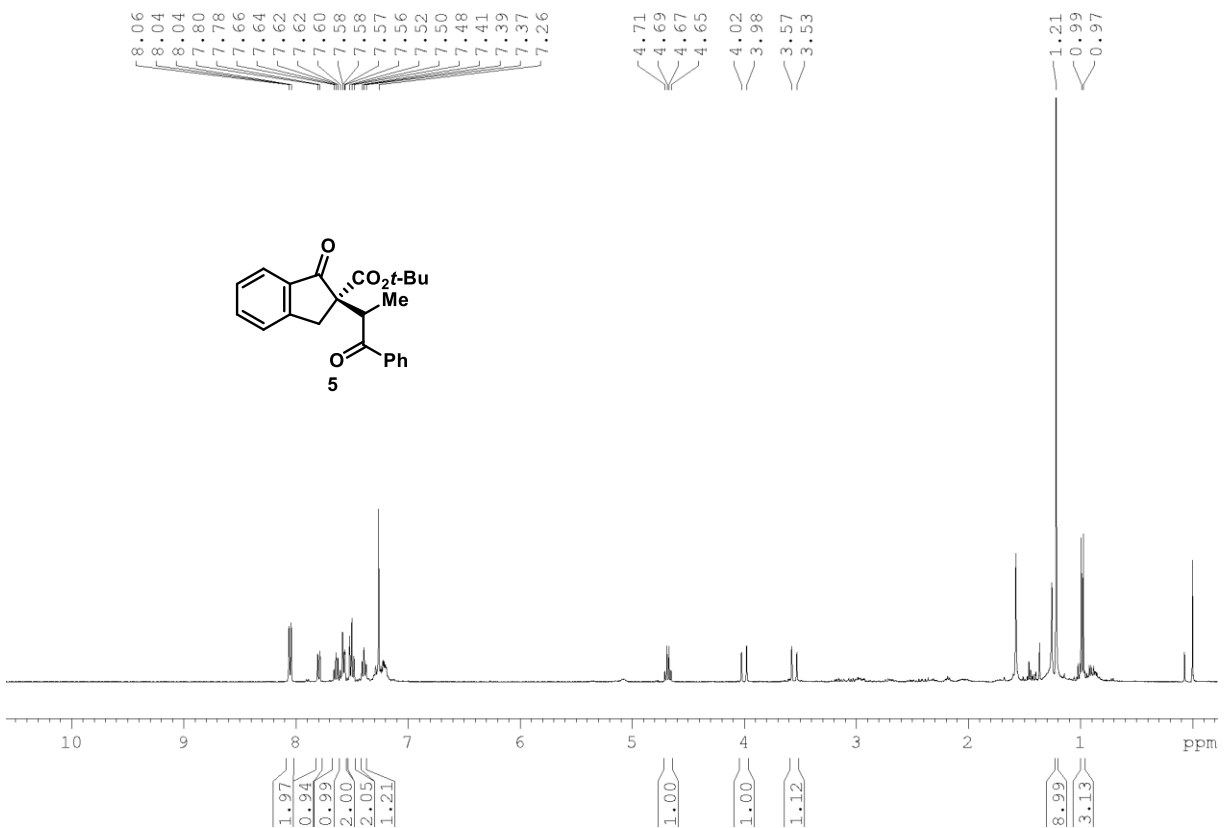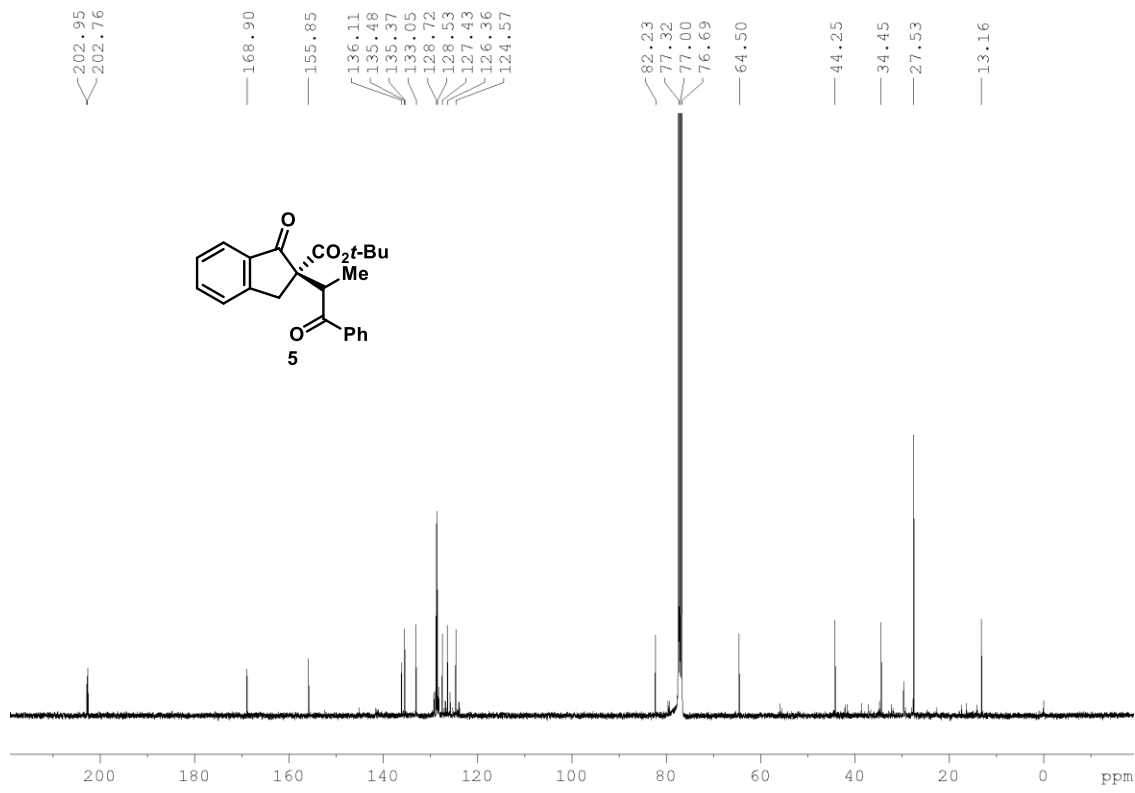

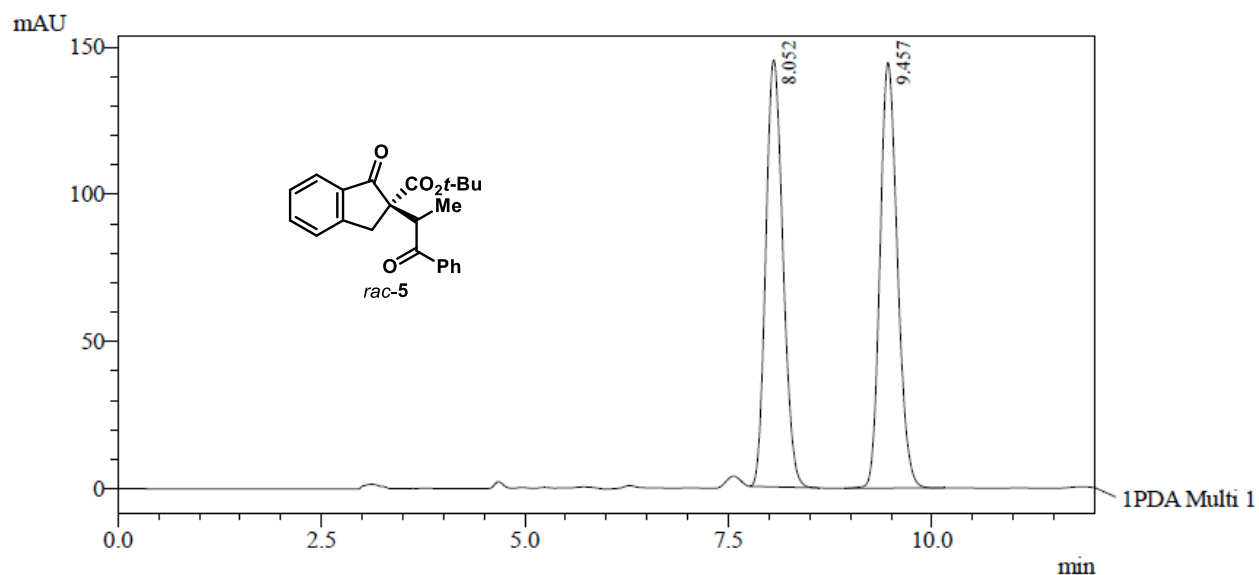

1 PDA Multi 1 / 254nm 4nm

PeakTable

PDA Ch1 254nm 4nm

| Peak# | Ret. Time | Area    | Area %  |
|-------|-----------|---------|---------|
| 1     | 8.052     | 2128640 | 49.718  |
| 2     | 9.457     | 2152816 | 50.282  |
| Total |           | 4281456 | 100.000 |

Daicel Chiralpak AD-H column (*n*-Hexane/IPA = 90:10, 1.0 mL min<sup>-1</sup>, 20 °C, 254 nm)

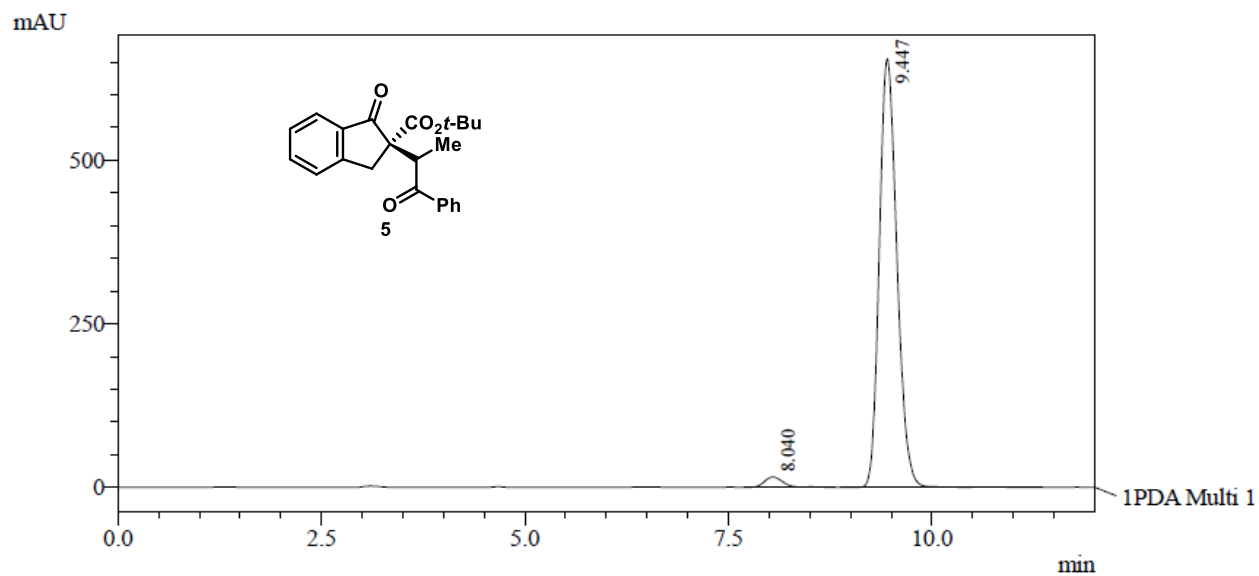

1 PDA Multi 1 / 254nm 4nm

PeakTable

PDA Ch1 254nm 4nm

| Peak# | Ret. Time | Area     | Area %  |
|-------|-----------|----------|---------|
| 1     | 8.040     | 251657   | 2.491   |
| 2     | 9.447     | 9852156  | 97.509  |
| Total |           | 10103813 | 100.000 |

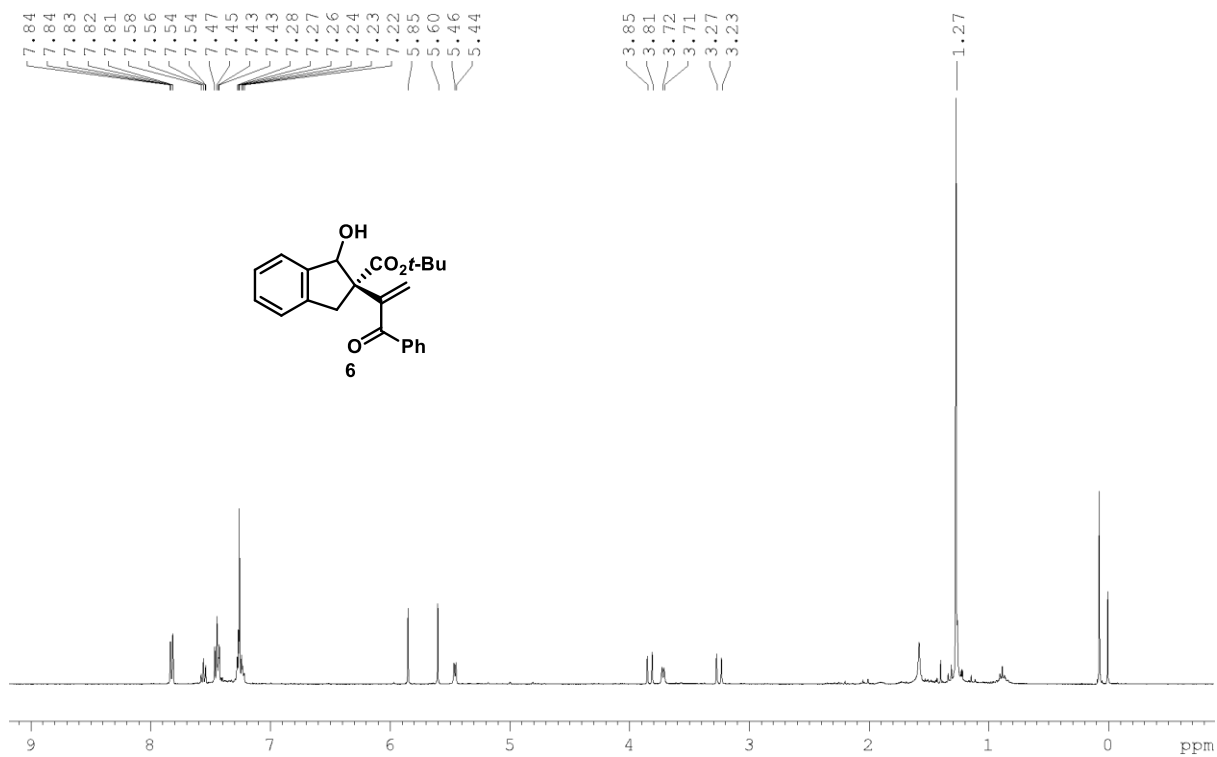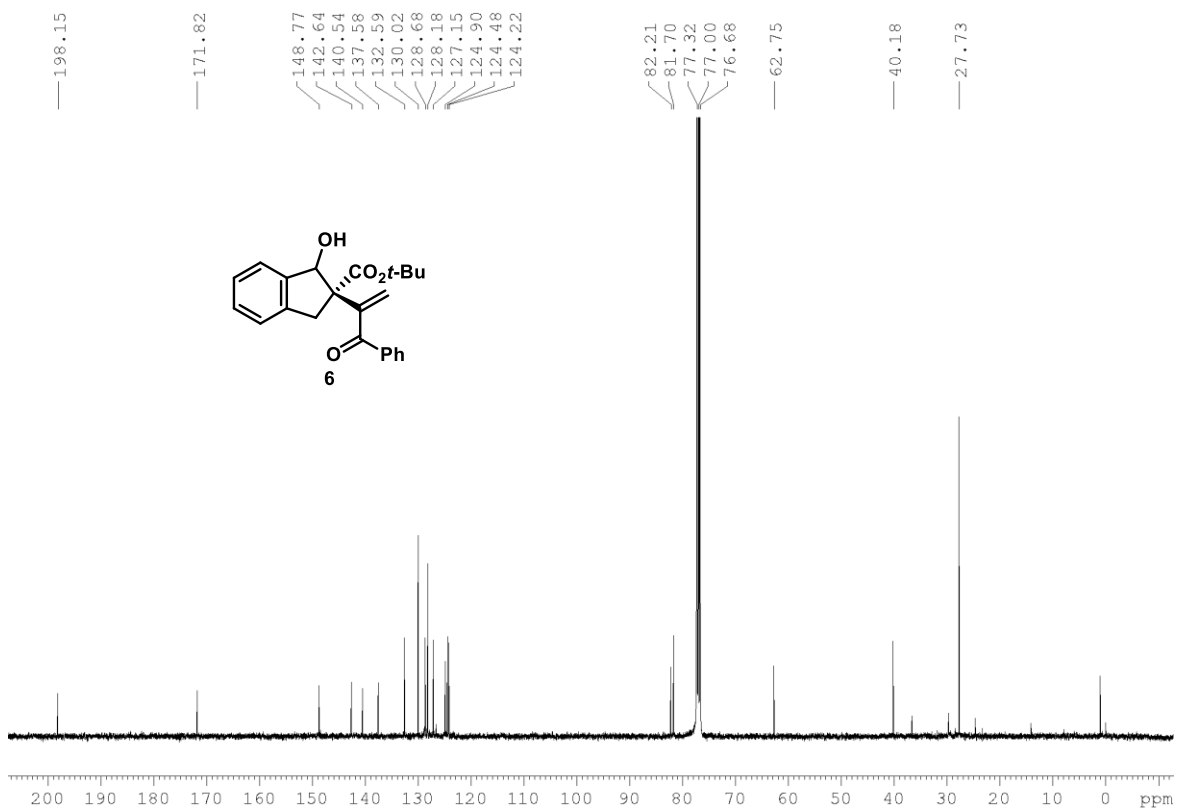



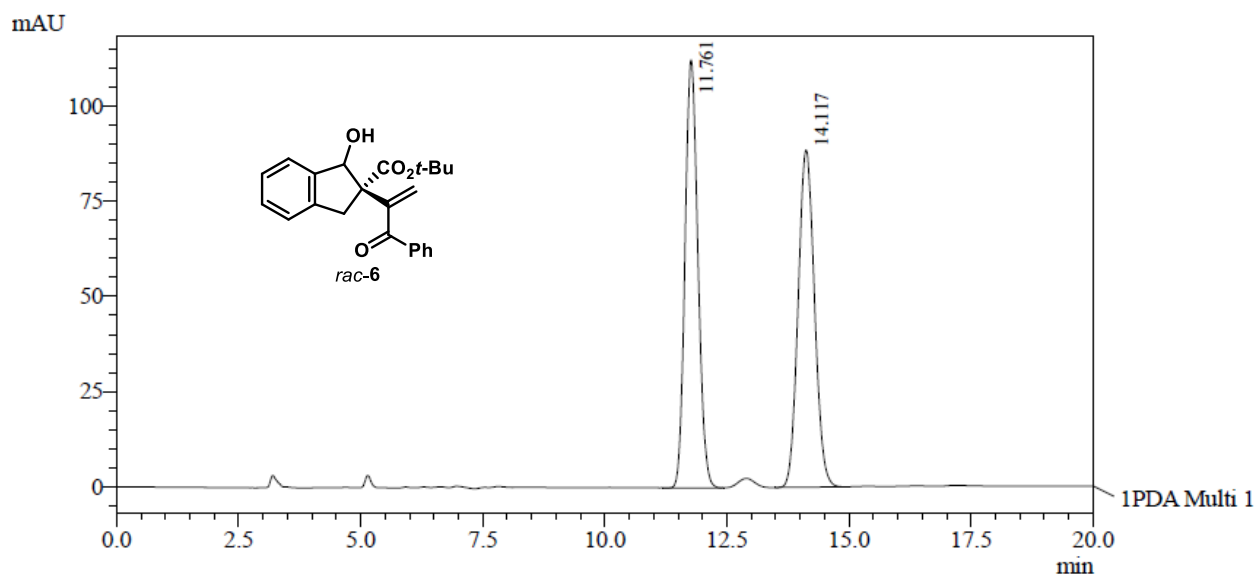

1 PDA Multi 1 / 254nm 4nm

PeakTable

PDA Ch1 254nm 4nm

| Peak# | Ret. Time | Area    | Area %  |
|-------|-----------|---------|---------|
| 1     | 11.761    | 2062410 | 49.963  |
| 2     | 14.117    | 2065502 | 50.037  |
| Total |           | 4127912 | 100.000 |

Daicel Chiralpak AD-H column (*n*-Hexane/EtOH = 95:5, 1.0 mL min<sup>-1</sup>, 20 °C, 254 nm)

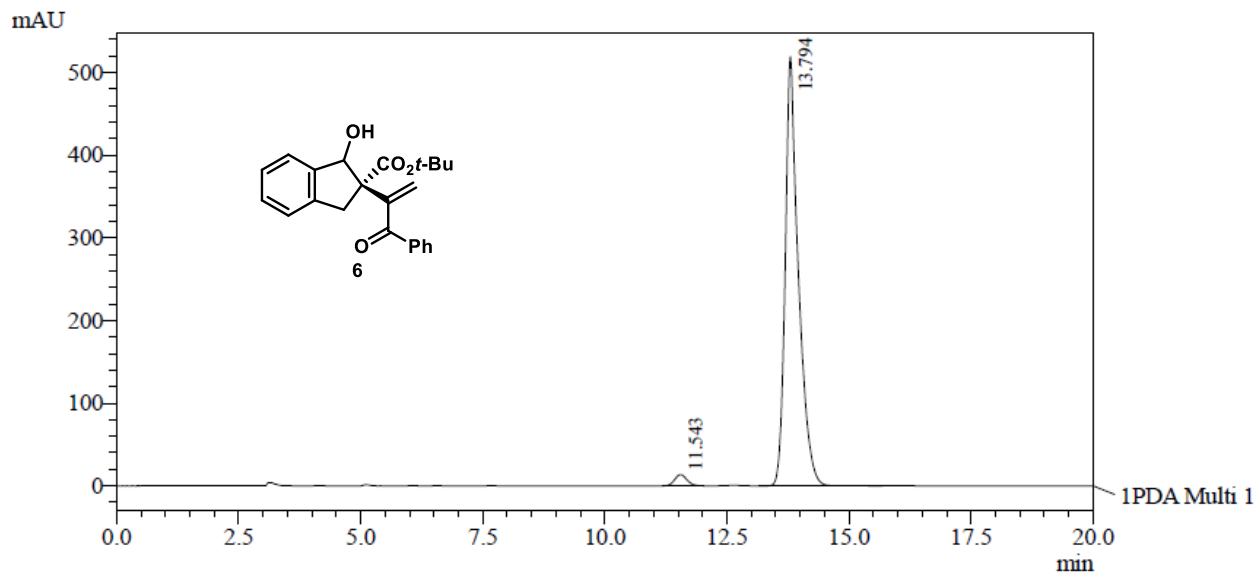

1 PDA Multi 1 / 254nm 4nm

PeakTable

PDA Ch1 254nm 4nm

| Peak# | Ret. Time | Area    | Area %  |
|-------|-----------|---------|---------|
| 1     | 11.543    | 235909  | 2.365   |
| 2     | 13.794    | 9739268 | 97.635  |
| Total |           | 9975177 | 100.000 |

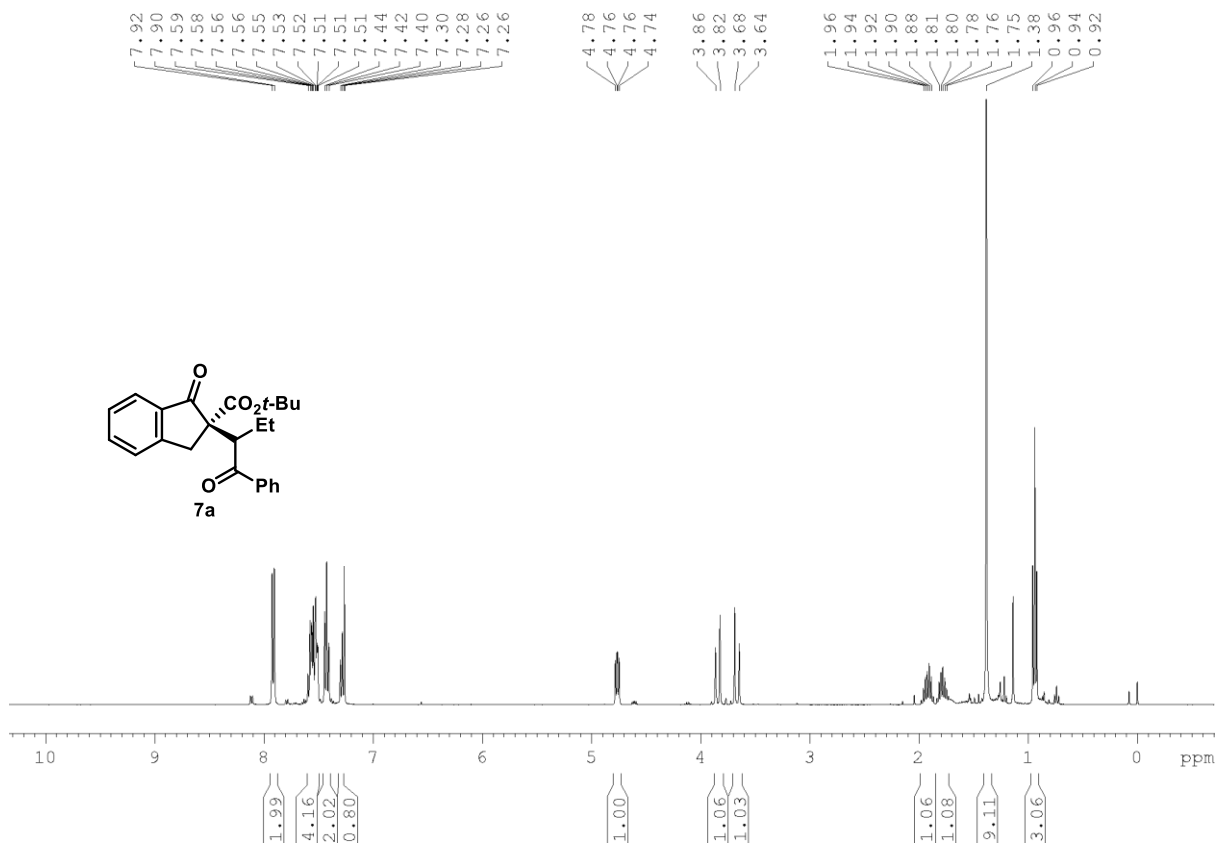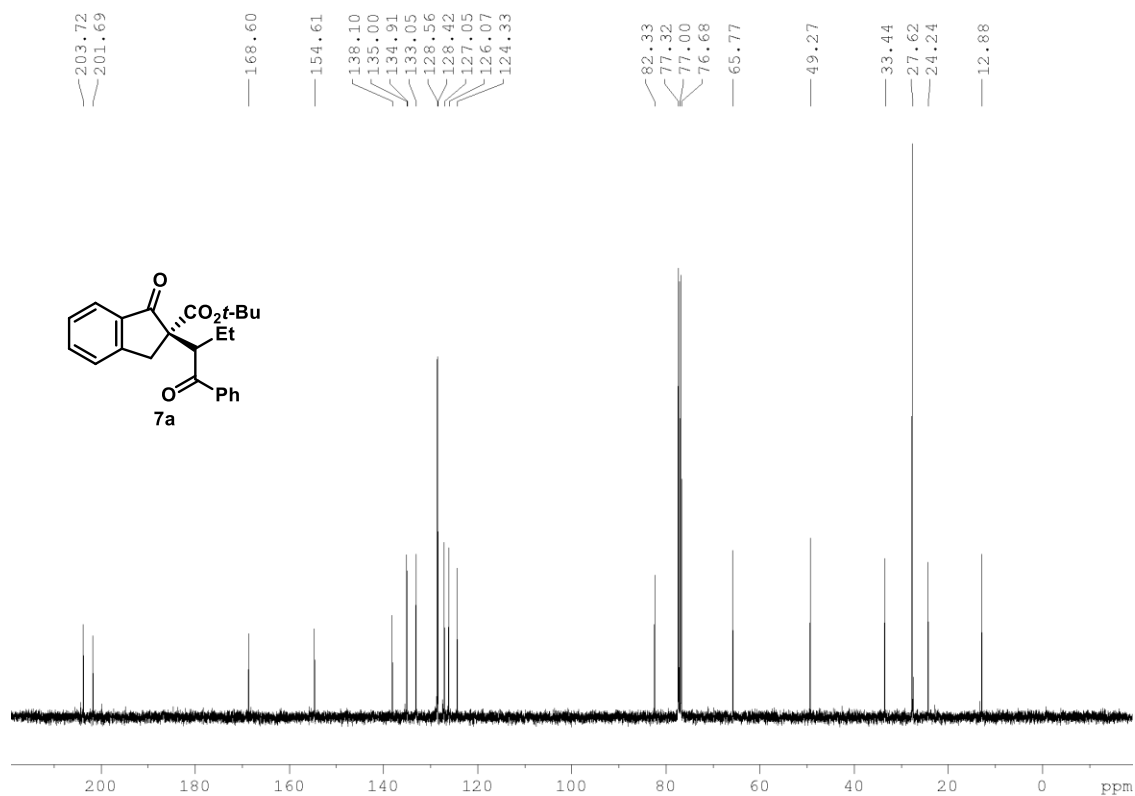

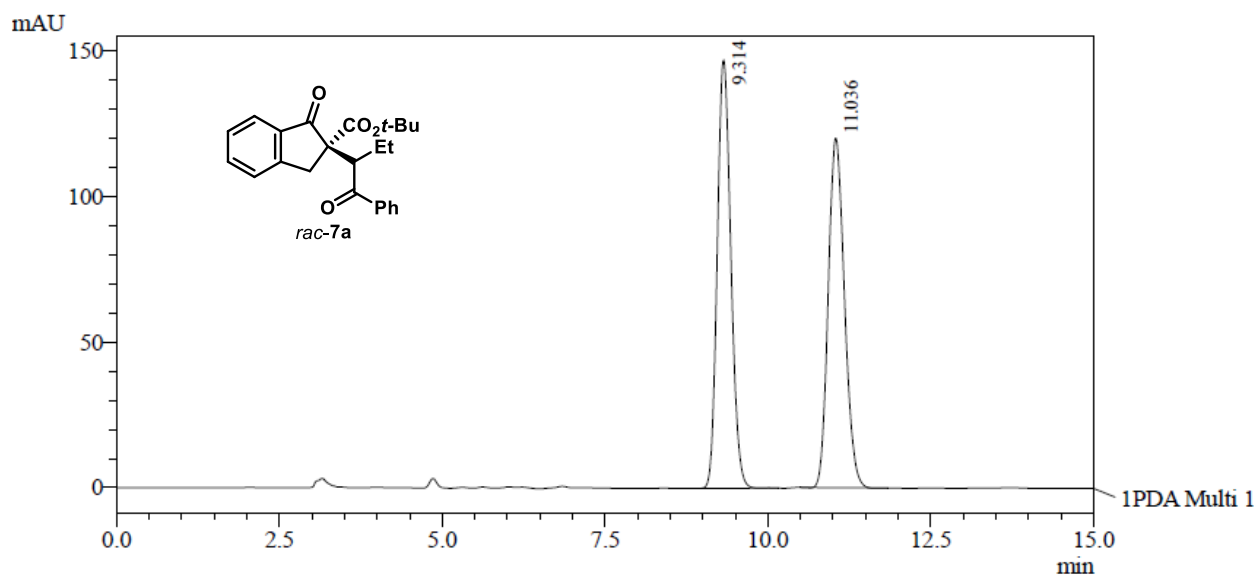

1 PDA Multi 1 / 254nm 4nm

PeakTable

PDA Ch1 254nm 4nm

| Peak# | Ret. Time | Area    | Area %  |
|-------|-----------|---------|---------|
| 1     | 9.314     | 2141246 | 50.749  |
| 2     | 11.036    | 2078019 | 49.251  |
| Total |           | 4219264 | 100.000 |

Daicel Chiralpak AD-H column (*n*-Hexane/EtOH = 95:5, 1.0 mL min<sup>-1</sup>, 20 °C, 254 nm)

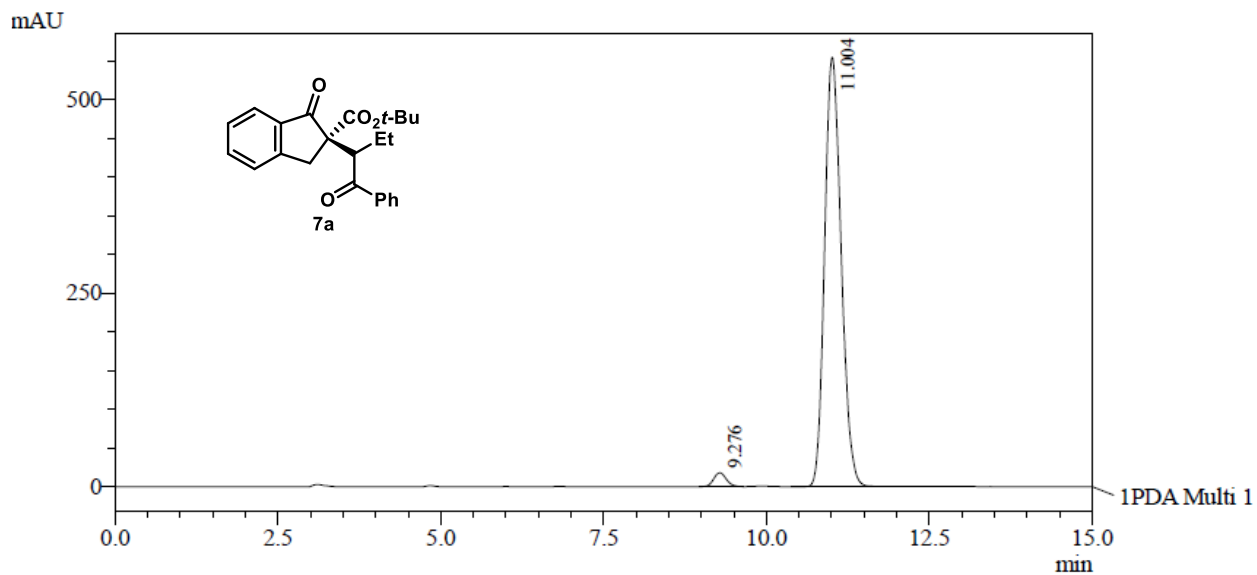

1 PDA Multi 1 / 254nm 4nm

PeakTable

PDA Ch1 254nm 4nm

| Peak# | Ret. Time | Area     | Area %  |
|-------|-----------|----------|---------|
| 1     | 9.276     | 240631   | 2.389   |
| 2     | 11.004    | 9833890  | 97.611  |
| Total |           | 10074520 | 100.000 |

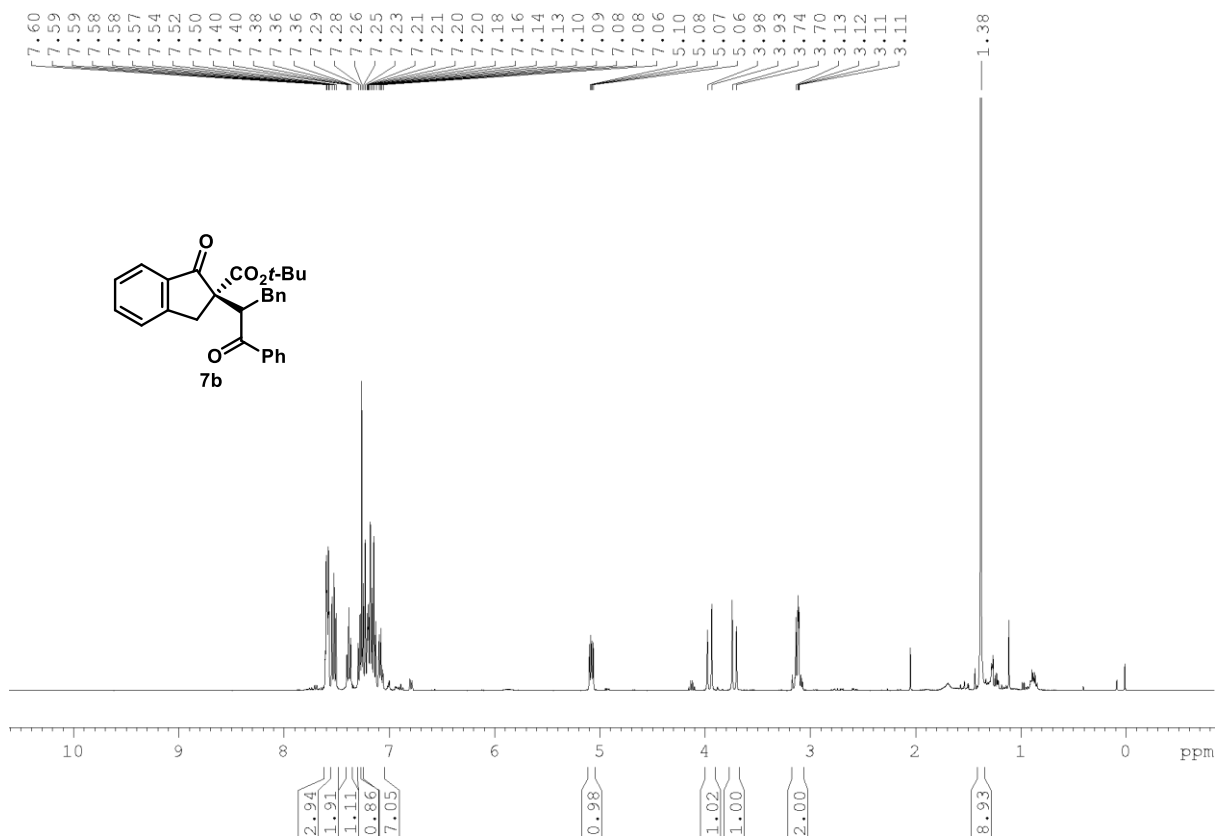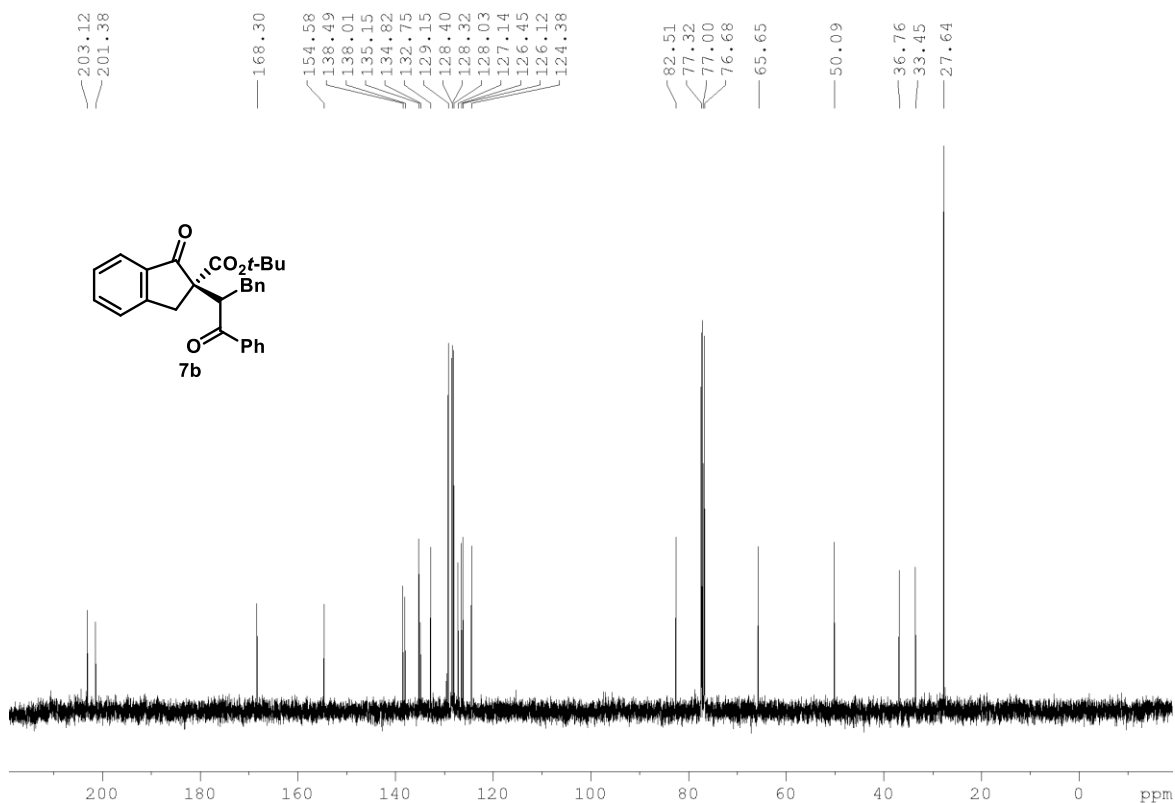

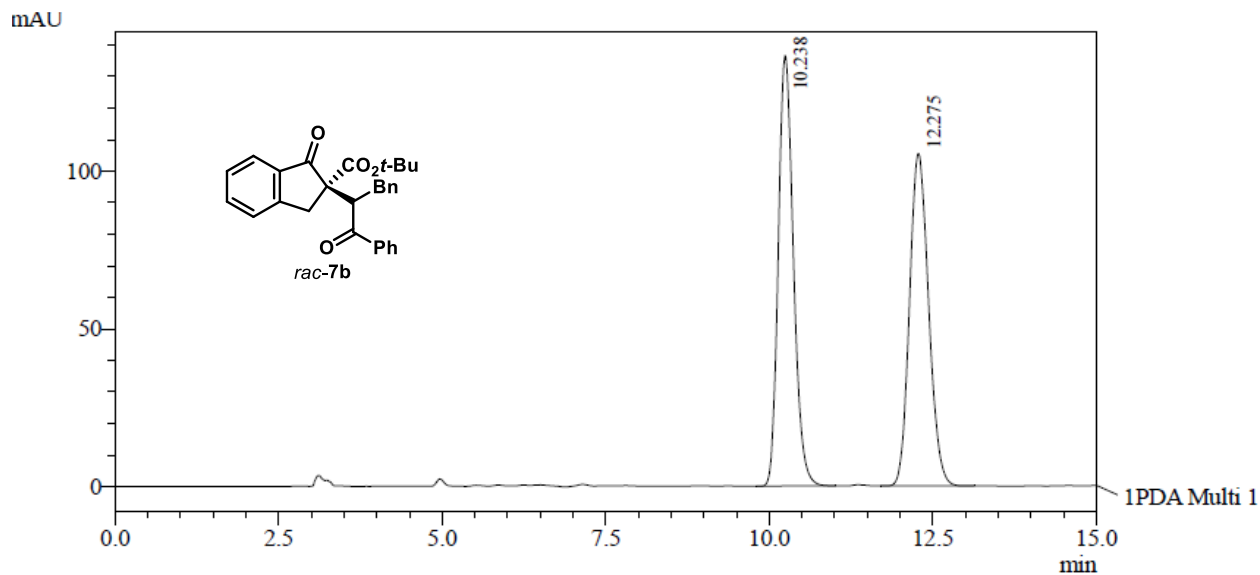

1 PDA Multi 1 / 254nm 4nm

PeakTable

PDA Ch1 254nm 4nm

| Peak# | Ret. Time | Area    | Area %  |
|-------|-----------|---------|---------|
| 1     | 10.238    | 2193416 | 50.612  |
| 2     | 12.275    | 2140394 | 49.388  |
| Total |           | 4333810 | 100.000 |

Daicel Chiralpak AD-H column (*n*-Hexane/IPA = 90:10, 1.0 mL min<sup>-1</sup>, 20 °C, 254 nm)

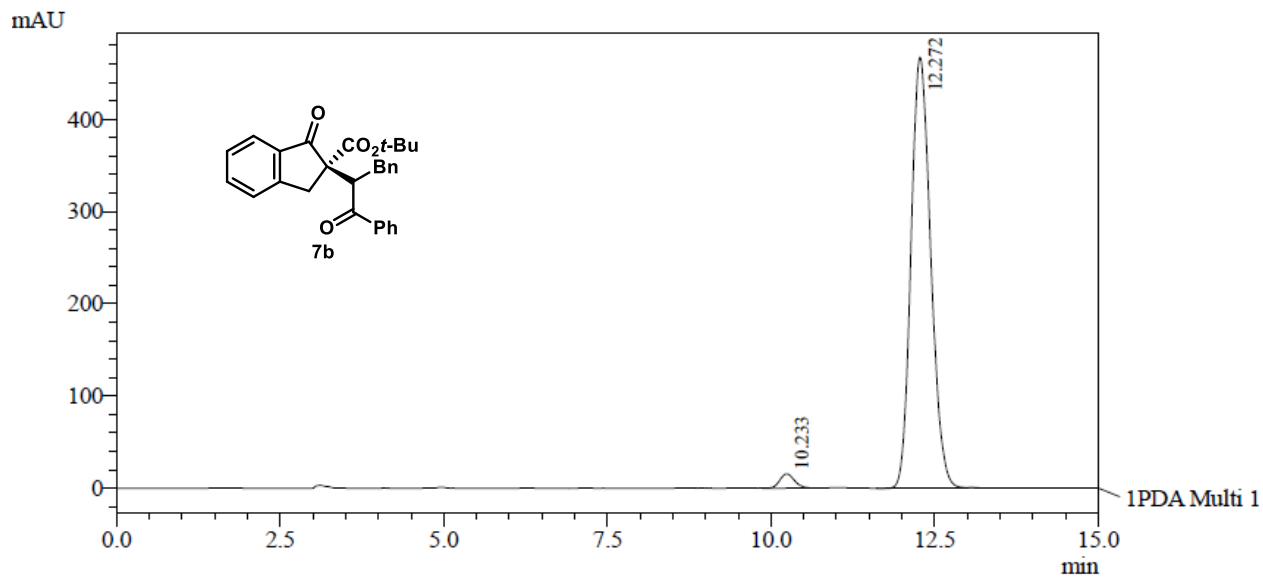

1 PDA Multi 1 / 254nm 4nm

PeakTable

PDA Ch1 254nm 4nm

| Peak# | Ret. Time | Area     | Area %  |
|-------|-----------|----------|---------|
| 1     | 10.233    | 238508   | 2.379   |
| 2     | 12.272    | 9788262  | 97.621  |
| Total |           | 10026770 | 100.000 |
